# Supplementary material for: Genome-wide interaction study of a proxy for stress-sensitivity and its prediction of major depressive disorder
Source: PLoS One. 2018 Dec 20;13(12):e0209160. doi: 10.1371/journal.pone.0209160 (PMC6301766; doi:10.1371/journal.pone.0209160)
Supplement: S1 File — (CSV) [file pone.0209160.s002.csv]

##########################################################################
#
#	BP Base pair position (GRCh37/hg19)
#	A1 minor allele.
#	A2 major allele.
#	BETA1 SNP effect in neuroticism score (EPQN) within MDD controls.
#	SE1 Standard error BETA1.
#	BETA2 SNP effect in EPQN within MDD cases.
#	SE2 Standard error BETA2.
#	P reflects significance of BETA coefficient.
#	BETA stress-sensitivity effect (i.e. differential allelic effect in EPQN between MDD cases and controls; BETA2 effect minus BETA1 effect).
#
##########################################################################
CHR	SNP	GenDist	BP	A1	A2	BETA1	SE1	BETA2	SE2	P	BETA
3	rs10510908	95.941	63762994	A	G	-0.07792	0.02704	0.1588	0.04224	2.364e-06	0.23672
11	rs7934698	0	134412739	A	G	-0.0633	0.03157	0.2141	0.04959	2.366e-06	0.2774
2	rs7606549	124.15	115490198	A	G	0.02374	0.02006	-0.154	0.03187	2.37e-06	-0.17774
4	rs6851779	76.1337	45487679	A	G	0.09384	0.03685	-0.2235	0.05645	2.505e-06	-0.31734
2	rs319858	190.028	115530841	G	A	0.05248	0.01983	-0.1204	0.03181	3.995e-06	-0.17288
3	rs13098181	153.978	63749405	A	G	-0.07987	0.02695	0.1452	0.04225	7.109e-06	0.22507
3	rs12108177	161.912	63673795	G	A	-0.07852	0.0261	0.1383	0.04087	7.76e-06	0.21682
20	rs6063840	12.5441	51208949	G	A	0.06519	0.02116	-0.1145	0.03416	7.772e-06	-0.17969
12	rs4765723	12.3913	3352543	C	A	-0.04887	0.02382	0.1471	0.03699	8.394e-06	0.19597
20	rs6068235	85.9976	51167169	A	G	0.06096	0.02135	-0.1195	0.03443	8.424e-06	-0.18046
7	rs13241748	66.0077	95794801	A	G	-0.1035	0.02557	0.1116	0.04126	9.316e-06	0.2151
20	rs2869652	172.114	51167318	G	A	0.0601	0.02133	-0.1188	0.03441	9.957e-06	-0.1789
20	rs2143942	84.4164	51168994	C	A	0.06006	0.02134	-0.1188	0.03441	1.003e-05	-0.17886
20	rs2207195	56.3039	51182264	C	A	0.06041	0.02133	-0.1168	0.03441	1.202e-05	-0.17721
20	rs6063820	84.8571	51166112	C	A	0.06033	0.02133	-0.1169	0.03443	1.206e-05	-0.17723
20	rs6126593	26.4778	51156147	A	C	0.0606	0.02133	-0.1162	0.03441	1.263e-05	-0.1768
20	rs6068222	24.9002	51158341	A	G	0.06024	0.02136	-0.1162	0.03442	1.322e-05	-0.17644
20	rs4811371	81.1843	51197000	C	A	0.06266	0.02113	-0.1118	0.03419	1.419e-05	-0.17446
20	rs1884003	0	51157242	A	C	0.05146	0.02111	-0.1219	0.03402	1.493e-05	-0.17336
14	rs988014	89.7855	79184350	G	A	0.06101	0.02053	-0.1053	0.03255	1.545e-05	-0.16631
7	rs13245850	52.5528	95937098	G	A	-0.09797	0.02532	0.1089	0.04117	1.859e-05	0.20687
2	rs4849321	110.661	114992849	A	G	-0.05192	0.0256	0.1545	0.04095	1.925e-05	0.20642
13	rs7985488	143.393	76109536	A	G	0.03894	0.02317	-0.1453	0.03661	2.123e-05	-0.18424
5	rs6879518	43.0321	27199033	C	A	-0.08711	0.03192	0.1661	0.05087	2.484e-05	0.25321
9	rs11265963	28.3538	92499771	A	G	-0.02704	0.02311	0.1546	0.03694	3.075e-05	0.18164
18	rs1420955	228.778	25152084	A	G	-0.03709	0.03786	0.2617	0.06095	3.12e-05	0.29879
13	rs975797	100.389	73797952	A	G	0.04264	0.02588	-0.1607	0.04149	3.2e-05	-0.20334
9	rs12003053	144.462	92499739	A	C	-0.02645	0.0231	0.1531	0.03695	3.789e-05	0.17955
15	rs16955177	142.577	46747377	G	A	0.05813	0.02818	-0.1578	0.04443	4.072e-05	-0.21593
22	rs6519955	54.2704	46421842	A	C	0.061	0.02045	-0.09776	0.03321	4.685e-05	-0.15876
21	rs760462	106.073	46328099	A	G	-0.01608	0.02475	0.1805	0.04149	4.749e-05	0.19658
10	rs7901509	160.11	14224687	G	A	-0.03006	0.0209	0.1256	0.03228	5.196e-05	0.15566
18	rs11081606	44.295	76031820	G	A	-0.06092	0.02057	0.09613	0.03301	5.404e-05	0.15705
20	rs6111696	0.0911038	17822834	G	A	-0.092	0.05573	0.334	0.08973	5.507e-05	0.426
2	rs319853	25.5547	115526908	G	A	-0.0395	0.01989	0.1105	0.03158	5.875e-05	0.15
1	rs1413216	50.7864	242805757	A	G	0.02135	0.02959	-0.2026	0.04724	5.884e-05	-0.22395
17	rs230989	129.33	15113435	G	A	0.03314	0.02214	-0.1367	0.03612	6.111e-05	-0.16984
9	rs9695510	85.8944	92105483	A	G	-0.1578	0.05036	0.2279	0.08206	6.166e-05	0.3857
14	rs2693684	103.317	99670005	C	A	-0.1302	0.03747	0.1549	0.06059	6.292e-05	0.2851
6	rs9358817	56.1247	9300312	A	G	-0.05133	0.01971	0.09791	0.03173	6.48e-05	0.14924
1	rs10919946	103.96	200456424	A	G	0.05821	0.04426	-0.2863	0.07412	6.594e-05	-0.34451
14	rs10135955	65.2704	78049734	A	G	-0.05353	0.01998	0.09838	0.0324	6.598e-05	0.15191
10	rs7905928	62.9728	14227908	A	C	-0.03041	0.02085	0.1222	0.03218	6.878e-05	0.15261
2	rs2117851	8.728	115500323	A	G	-0.05015	0.02263	0.1215	0.0367	6.88e-05	0.17165
1	rs1106201	22.1078	205272926	A	G	0.05351	0.02144	-0.1112	0.03544	7.009e-05	-0.16471
1	rs1539695	159.676	205274675	A	G	0.05382	0.02146	-0.1108	0.0354	7.015e-05	-0.16462
6	rs9349331	175.452	45808357	C	A	0.05636	0.02374	-0.1233	0.03847	7.044e-05	-0.17966
16	rs9939076	70.704	89079773	A	G	-0.05867	0.0211	0.09726	0.03313	7.191e-05	0.15593
10	rs7068441	35.32	14234352	G	A	-0.03884	0.02235	0.125	0.03473	7.308e-05	0.16384
2	rs10454125	190.89	129865142	A	C	0.2175	0.05676	-0.1899	0.08581	7.527e-05	-0.4074
9	rs9775506	121.377	92501780	A	G	-0.0184	0.0265	0.1763	0.04153	7.759e-05	0.1947
2	rs7340215	56.8937	241805851	A	G	0.05537	0.0201	-0.09406	0.03204	7.804e-05	-0.14943
2	rs16838083	219.376	207076024	C	A	-0.03869	0.05773	0.3876	0.09124	7.856e-05	0.42629
14	rs182709	8.72047	30486324	A	G	-0.06165	0.02415	0.1158	0.03828	8.869e-05	0.17745
6	rs2743597	90.0797	19563321	G	A	-0.02333	0.02172	0.1361	0.03463	9.609e-05	0.15943
15	rs4357890	144.131	70689995	G	A	-0.06682	0.02744	0.1377	0.0447	9.623e-05	0.20452
20	rs6114608	166.491	24273444	G	A	-0.06701	0.05464	0.3537	0.09314	9.799e-05	0.42071
7	rs2159813	197.155	52557887	A	G	0.02694	0.02712	-0.1665	0.04165	9.931e-05	-0.19344
22	rs2213767	62.5067	27370782	A	G	-0.0643	0.0295	0.152	0.04714	0.0001008	0.2163
20	rs968162	197.002	51037837	A	G	0.05742	0.022	-0.1054	0.03581	0.0001066	-0.16282
5	rs2607374	71.8786	67959925	G	A	-0.03256	0.02951	0.1815	0.04675	0.0001077	0.21406
4	rs1507439	78.4799	29195105	C	A	0.03748	0.01961	-0.1056	0.03132	0.0001086	-0.14308
12	rs17109924	55.2137	71977787	G	A	-0.1167	0.03858	0.1642	0.06167	0.000113	0.2809
6	rs7771410	4.49025	39863468	A	G	-0.1986	0.07431	0.3601	0.1244	0.000115	0.5587
9	rs7859211	105.747	92093576	A	G	-0.1648	0.05113	0.2182	0.08514	0.0001154	0.383
19	rs7248792	73.4713	56798230	A	G	-0.1116	0.03893	0.1772	0.06404	0.0001165	0.2888
5	rs2278395	68.3055	150138196	A	C	0.09507	0.05052	-0.2591	0.07686	0.0001178	-0.35417
4	rs6844474	67.4568	93354048	A	G	0.08903	0.03161	-0.1408	0.05064	0.0001179	-0.22983
4	rs2009775	118.353	137760899	A	G	0.05294	0.02335	-0.117	0.03748	0.0001191	-0.16994
16	rs12446689	67.9246	56938016	G	A	-0.04132	0.02924	0.1736	0.0476	0.0001194	0.21492
16	rs7498845	134.095	89066527	A	G	-0.05541	0.02098	0.09395	0.03273	0.0001222	0.14936
9	rs10757821	57.77	29230848	A	C	-0.06506	0.03267	0.1689	0.05148	0.0001248	0.23396
2	rs7594662	71.7601	49984263	A	G	0.1061	0.04457	-0.215	0.07101	0.0001283	-0.3211
2	rs10497301	169.096	167586125	G	A	-0.01458	0.02823	0.1873	0.04456	0.0001295	0.20188
13	rs1324061	31.2021	74388087	G	A	0.04014	0.01963	-0.1024	0.03168	0.0001313	-0.14254
20	rs988255	41.8345	51013319	C	A	0.05515	0.02191	-0.1051	0.03573	0.0001317	-0.16025
15	rs16955801	48.4607	46788587	G	A	0.04832	0.02428	-0.1274	0.0391	0.0001352	-0.17572
15	rs17816375	76.546	33080747	G	A	-0.07354	0.02186	0.08396	0.03502	0.0001361	0.1575
8	rs241181	51.596	28647832	A	C	-0.05279	0.02612	0.1311	0.04059	0.0001387	0.18389
17	rs230999	75.7317	15101792	G	A	0.03467	0.0223	-0.1283	0.0365	0.0001389	-0.16297
9	rs10813028	78.2251	29223296	A	G	-0.06159	0.03257	0.1687	0.05106	0.0001432	0.23029
2	rs4675792	71.5493	241819526	G	A	0.0481	0.02021	-0.09673	0.03229	0.0001434	-0.14483
18	rs9967271	100.28	25199125	G	A	-0.02901	0.03804	0.2419	0.06043	0.0001487	0.27091
20	rs861333	113.068	51247928	A	G	0.05433	0.02074	-0.09329	0.03293	0.0001487	-0.14762
2	rs1112310	81.8333	234567916	A	C	0.03502	0.02205	-0.1224	0.03518	0.0001501	-0.15742
4	rs1563804	111.928	156772468	G	A	0.04985	0.0233	-0.1214	0.03874	0.0001527	-0.17125
11	rs17119743	110.986	116344404	C	A	0.03446	0.02329	-0.1291	0.03642	0.0001542	-0.16356
4	rs12639884	258.49	178013213	A	G	-0.02711	0.03024	0.194	0.05004	0.0001554	0.22111
10	rs174849	117.937	44615859	A	G	0.05671	0.03454	-0.1822	0.05299	0.0001588	-0.23891
5	rs7705250	8.77872	44066669	A	G	-0.05521	0.03109	0.1676	0.05014	0.0001593	0.22281
22	rs17687000	41.8199	32668726	A	G	-0.02846	0.03867	0.253	0.06375	0.0001604	0.28146
9	rs10121164	98.3183	115918552	G	A	-0.01663	0.02113	0.1318	0.03332	0.0001681	0.14843
17	rs231010	140.846	15096828	A	C	0.03238	0.02232	-0.1286	0.03651	0.0001691	-0.16098
11	rs12222524	18.4714	116233206	G	A	-0.2193	0.0915	0.4288	0.1462	0.0001712	0.6481
2	rs11123233	36.3496	114987326	G	A	-0.02051	0.02071	0.1244	0.03259	0.0001749	0.14491
2	rs4849179	237.743	113985170	A	G	-0.04781	0.0207	0.0991	0.03328	0.0001777	0.14691
7	rs1880736	85.5493	48315796	C	A	-0.06297	0.02062	0.08273	0.03296	0.0001787	0.1457
6	rs7768472	20.1085	9308123	G	A	-0.04836	0.02363	0.1174	0.03741	0.0001791	0.16576
12	rs1163929	42.9019	17602872	A	C	-0.07072	0.02237	0.08541	0.03516	0.0001794	0.15613
2	rs882575	50.9842	115018255	G	A	-0.007086	0.02154	0.1443	0.03419	0.0001806	0.151386
4	rs6820781	91.1207	29141525	A	G	0.0466	0.02005	-0.09515	0.03212	0.0001811	-0.14175
2	rs4561658	112.14	216742443	G	A	-0.08171	0.03689	0.1817	0.05995	0.0001823	0.26341
18	rs8087963	83.2104	19569454	A	G	-0.1121	0.07125	0.4121	0.1208	0.0001859	0.5242
5	rs403237	7.79536	110884998	A	G	0.008904	0.02188	-0.1485	0.03598	0.0001859	-0.157404
4	rs1490463	65.3407	149386704	A	G	0.1202	0.03224	-0.109	0.05219	0.0001866	-0.2292
20	rs2745844	75.5873	17822659	G	A	-0.06708	0.0521	0.3025	0.08415	0.0001884	0.36958
4	rs1531959	115.496	81462163	A	G	-0.05461	0.03773	0.2089	0.05967	0.0001897	0.26351
16	rs4786722	51.77	5636332	A	G	-0.08746	0.02938	0.1225	0.04813	0.0001961	0.20996
4	rs12650756	66.7687	81453383	A	G	-0.0588	0.03798	0.2062	0.06017	0.0001962	0.265
3	rs328047	102.187	78972040	G	A	0.02699	0.02056	-0.1154	0.03224	0.0001969	-0.14239
8	rs17094707	124.98	13460704	G	A	0.03969	0.02827	-0.1658	0.04747	0.0001995	-0.20549
2	rs11889877	132.542	66080617	A	G	0.03828	0.02529	-0.1387	0.04031	0.0001996	-0.17698
1	rs6696698	133.763	91658368	G	A	-0.1755	0.08278	0.4111	0.1343	0.0002002	0.5866
11	rs10894953	104.819	134919439	A	G	-0.05697	0.02512	0.1255	0.0422	0.0002037	0.18247
12	rs7299659	151.75	8696661	A	G	-0.02926	0.02574	0.1485	0.04039	0.0002057	0.17776
1	rs7523607	184	242767678	A	C	0.04618	0.02344	-0.1213	0.03858	0.0002065	-0.16748
7	rs804751	136.686	52623937	C	A	-0.084	0.02471	0.0917	0.04043	0.0002084	0.1757
20	rs11087800	78.0123	894951	A	G	0.01246	0.02287	-0.1519	0.03798	0.0002097	-0.16436
6	rs9502509	76.3333	6816332	A	G	0.03447	0.02296	-0.1304	0.03808	0.0002103	-0.16487
7	rs2222649	146.519	48294575	A	G	-0.06213	0.02065	0.08183	0.03294	0.000213	0.14396
20	rs2180911	22.5648	44949747	G	A	-0.02661	0.02108	0.1208	0.03376	0.0002131	0.14741
6	rs10457728	60.0912	142200163	G	A	0.04982	0.02195	-0.105	0.03558	0.0002136	-0.15482
9	rs12343454	169.816	133816023	A	G	-0.131	0.08391	0.4292	0.1259	0.000214	0.5602
4	rs344117	18.3005	77619296	G	A	0.04607	0.01999	-0.0942	0.03219	0.0002142	-0.14027
17	rs231007	121.859	15097744	G	A	0.03257	0.02232	-0.1258	0.03651	0.0002153	-0.15837
4	rs6849668	43.5776	81764113	A	G	-0.04496	0.02583	0.1347	0.04111	0.0002154	0.17966
7	rs17547830	20.7932	48313510	G	A	-0.06234	0.02064	0.08127	0.03291	0.0002184	0.14361
4	rs13111397	40.8163	81449030	A	G	-0.06059	0.03792	0.2015	0.0599	0.0002187	0.26209
1	rs4846127	133.951	12663774	A	G	-0.07085	0.01961	0.06742	0.03187	0.0002196	0.13827
7	rs677014	80.78	71200151	C	A	-0.06942	0.02288	0.09135	0.03703	0.0002212	0.16077
9	rs7025492	153.712	29849587	A	C	0.05293	0.02053	-0.08884	0.03249	0.0002252	-0.14177
10	rs10906620	209.16	14212066	G	A	-0.02687	0.02055	0.1138	0.03214	0.0002265	0.14067
10	rs7477069	159.676	54542138	A	G	0.02308	0.0203	-0.1199	0.03306	0.0002283	-0.14298
2	rs10205187	210.988	113333410	A	G	0.08857	0.03474	-0.1476	0.05397	0.0002332	-0.23617
3	rs4679496	75.75	59580150	A	C	-0.05977	0.01966	0.078	0.03187	0.0002344	0.13777
13	rs9509121	81.7744	20836930	A	G	-0.07254	0.08228	0.5211	0.1391	0.0002397	0.59364
14	rs943163	64.7509	34238126	A	G	-0.02526	0.02039	0.1174	0.0331	0.0002435	0.14266
16	rs12447686	229.164	89048291	A	G	-0.06186	0.02262	0.09261	0.03552	0.0002438	0.15447
7	rs17135113	141.852	4817952	A	C	0.0409	0.04021	-0.2357	0.06381	0.0002446	-0.2766
12	rs7305388	80.4255	72102047	A	G	-0.1111	0.0403	0.1723	0.06606	0.0002495	0.2834
13	rs9510483	141.462	23555339	A	G	-0.02511	0.02353	0.1397	0.03836	0.0002496	0.16481
11	rs7118058	92.1142	7641875	A	C	0.1075	0.03498	-0.146	0.05976	0.0002512	-0.2535
1	rs12563114	52.3701	201344908	A	G	0.1822	0.0768	-0.4223	0.1462	0.0002519	-0.6045
18	rs221877	36.6558	55066546	G	A	0.07835	0.03068	-0.1333	0.04907	0.0002541	-0.21165
2	rs10932563	93.7838	215567903	A	G	-0.05085	0.02334	0.1098	0.03723	0.000257	0.16065
5	rs17057594	177.281	159702834	G	A	0.09263	0.04638	-0.2382	0.07774	0.0002572	-0.33083
4	rs12501471	56.27	61903366	A	G	-0.06577	0.05774	0.3507	0.09828	0.0002584	0.41647
10	rs17102865	64.7	85724777	G	A	0.0679	0.04191	-0.2116	0.0641	0.0002627	-0.2795
14	rs877455	4.99428	98361012	A	G	0.09008	0.03793	-0.1642	0.05849	0.0002643	-0.25428
20	rs2618582	111.82	17834953	G	A	-0.06089	0.04461	0.2602	0.07588	0.0002643	0.32109
1	rs7539841	28.3	20049351	A	C	-0.03265	0.0236	0.1282	0.03726	0.000266	0.16085
10	rs4642997	16.4977	73653867	G	A	0.05547	0.02349	-0.1051	0.03724	0.0002662	-0.16057
7	rs13233225	159.936	48314798	A	C	-0.06244	0.02065	0.07923	0.03292	0.0002671	0.14167
20	rs6036213	76.3276	22738735	A	G	0.02475	0.02129	-0.1204	0.03374	0.0002736	-0.14515
6	rs1154854	75.5568	55612431	G	A	-0.03709	0.02058	0.1035	0.03272	0.0002743	0.14059
9	rs7020852	107.128	96163260	G	A	0.01881	0.02034	-0.1206	0.03251	0.0002773	-0.13941
1	rs536662	185.707	120292733	A	G	-0.04185	0.01987	0.09424	0.03173	0.0002782	0.13609
9	rs9330449	75.9389	92501369	A	G	-0.0326	0.02067	0.1081	0.03274	0.0002792	0.1407
10	rs12784646	104.07	26876769	G	A	0.01766	0.02311	-0.1395	0.03663	0.0002855	-0.15716
6	rs4709025	92.5776	164362709	G	A	-0.08395	0.03042	0.1262	0.0493	0.0002855	0.21015
7	rs6951397	39.5246	128368205	G	A	-0.03032	0.02103	0.1125	0.0333	0.000286	0.14282
14	rs8017303	120.048	34243248	A	G	-0.03144	0.02346	0.1287	0.03741	0.0002867	0.16014
10	rs10906624	17.4629	14225797	C	A	-0.03956	0.0221	0.1087	0.03438	0.0002872	0.14826
2	rs13395779	179.965	113329522	G	A	0.08514	0.03475	-0.1476	0.05397	0.0002877	-0.23274
20	rs856427	157.005	51251485	G	A	0.04877	0.0205	-0.09071	0.03268	0.0003003	-0.13948
13	rs12857574	109.17	107061428	A	C	-0.009278	0.02062	0.1307	0.03281	0.0003036	0.139978
3	rs498805	52.4109	78968841	G	A	0.0481	0.02075	-0.09167	0.03269	0.0003067	-0.13977
4	rs7672761	55.0981	81385386	G	A	-0.06628	0.03839	0.1939	0.061	0.000307	0.26018
2	rs6722369	115.923	88591175	G	A	0.06634	0.03016	-0.14	0.04858	0.0003081	-0.20634
18	rs11661210	150.926	75485034	C	A	-0.02339	0.05613	0.3581	0.08962	0.0003089	0.38149
11	rs4753073	58.2993	92717475	G	A	-0.05118	0.01991	0.08353	0.0316	0.00031	0.13471
18	rs873353	69.6787	19607342	G	A	-0.1007	0.04677	0.2179	0.07491	0.00031	0.3186
4	rs344135	36.405	77652219	G	A	0.05193	0.01998	-0.08446	0.03213	0.0003128	-0.13639
16	rs6498937	51.2989	64207981	A	C	0.05746	0.03865	-0.2114	0.06379	0.0003131	-0.26886
10	rs7080759	42.1281	14237503	A	G	-0.03221	0.02222	0.1154	0.03445	0.000316	0.14761
12	rs17109973	78.99	72006799	A	G	-0.105	0.03866	0.1577	0.06185	0.0003169	0.2627
16	rs6500514	51.6492	89057561	G	A	-0.05778	0.02102	0.08185	0.03262	0.0003198	0.13963
4	rs12645025	111.072	81441407	A	G	-0.05312	0.0368	0.1949	0.05828	0.0003203	0.24802
1	rs620092	61.1639	57421166	G	A	-0.05328	0.02017	0.08137	0.03155	0.0003233	0.13465
9	rs2306183	85.8251	96052179	G	A	0.04028	0.01968	-0.09433	0.03187	0.0003258	-0.13461
4	rs7693669	109.727	14433990	G	A	-0.02572	0.02008	0.1106	0.03221	0.0003279	0.13632
2	rs13010891	226.15	215570362	A	G	-0.04517	0.02682	0.1341	0.0421	0.0003301	0.17927
10	rs11517066	41.831	100953030	G	A	-0.05171	0.03159	0.1584	0.04929	0.0003312	0.21011
9	rs2184255	65.6419	96176203	A	G	0.01872	0.02032	-0.1188	0.03246	0.0003312	-0.13752
14	rs11157743	103.698	50861993	A	G	0.01257	0.02139	-0.1312	0.03392	0.0003377	-0.14377
22	rs7286890	51.9935	49686659	A	G	-0.04845	0.02965	0.1566	0.04892	0.0003377	0.20505
14	rs2297060	33.0396	25281219	G	A	0.2166	0.08845	-0.3505	0.1312	0.0003382	-0.5671
19	rs1005731	180.154	33908717	C	A	0.04067	0.02267	-0.1144	0.03688	0.0003419	-0.15507
11	rs6483212	106.739	92725240	A	G	-0.0496	0.01989	0.08401	0.03157	0.0003424	0.13361
2	rs12711805	189.28	115551783	A	C	0.03396	0.02018	-0.1037	0.03273	0.0003436	-0.13766
19	rs2074977	32.0245	3434028	C	A	0.007096	0.02062	-0.1327	0.03316	0.0003446	-0.139796
6	rs9444758	104.762	91061153	C	A	0.03904	0.02799	-0.1571	0.04711	0.0003451	-0.19614
10	rs1078145	118.13	85718958	G	A	0.06561	0.04393	-0.2209	0.06702	0.0003494	-0.28651
5	rs675785	25.5052	41648335	A	G	-0.09155	0.04255	0.1913	0.06673	0.0003508	0.28285
1	rs4845713	75.296	151894887	G	A	-0.07844	0.02062	0.0569	0.03178	0.0003532	0.13534
12	rs17206242	105.416	79402617	A	G	0.08555	0.02696	-0.09791	0.04372	0.0003542	-0.18346
5	rs316717	46.2833	41669628	A	C	-0.08458	0.04271	0.1995	0.06714	0.0003569	0.28408
5	rs13166990	45.3888	101215710	A	C	-0.05549	0.02067	0.08462	0.03336	0.0003572	0.14011
20	rs856404	146.518	51263786	G	A	0.0362	0.02082	-0.1029	0.03293	0.0003576	-0.1391
9	rs7860650	96.805	78721689	A	G	-0.0455	0.0315	0.1641	0.04961	0.0003602	0.2096
18	rs221885	76.1995	55072358	A	G	0.08047	0.03081	-0.1271	0.04935	0.0003607	-0.20757
13	rs6562749	122.016	73815959	A	C	0.08772	0.0371	-0.1577	0.05795	0.0003622	-0.24542
20	rs1033662	185.847	51025381	G	A	0.05581	0.0203	-0.08297	0.03322	0.0003635	-0.13878
5	rs7723992	20.1698	41853514	C	A	-0.08836	0.04232	0.1915	0.0661	0.0003637	0.27986
20	rs6068182	140.015	51056675	G	A	-0.04426	0.02348	0.1131	0.03739	0.0003657	0.15736
19	rs3746070	74.7013	3181066	A	G	-0.06722	0.03469	0.1603	0.05361	0.0003671	0.22752
15	rs16955195	41.0996	46748538	C	A	0.0458	0.02763	-0.1376	0.04348	0.000372	-0.1834
10	rs11200757	24.6571	85723816	G	A	0.06665	0.04396	-0.218	0.06689	0.0003765	-0.28465
13	rs12875027	57.9734	23571993	G	A	-0.03615	0.02372	0.125	0.03862	0.0003767	0.16115
3	rs212017	80.627	59984501	C	A	-0.06113	0.0328	0.1561	0.05155	0.0003767	0.21723
10	rs11238713	56.82	44295539	G	A	-0.04285	0.03617	0.2	0.05794	0.0003771	0.24285
2	rs319855	2.94834	115527730	A	G	0.04177	0.01984	-0.09146	0.03182	0.0003807	-0.13323
12	rs11115613	5.44325	77219305	A	C	-0.01003	0.03603	0.2389	0.0601	0.000381	0.24893
8	rs6421404	190.976	17542215	G	A	-0.03521	0.02104	0.1082	0.03446	0.0003813	0.14341
16	rs2550904	55.6431	75528511	A	G	-0.02253	0.02055	0.1158	0.03311	0.0003845	0.13833
6	rs11966263	69.5176	7629859	A	G	0.06744	0.02166	-0.07933	0.03522	0.0003851	-0.14677
20	rs856416	106.794	51252989	G	A	0.04799	0.02053	-0.08929	0.03278	0.0003864	-0.13728
1	rs857785	14.3492	158784259	A	G	0.03134	0.01956	-0.102	0.0321	0.0003882	-0.13334
12	rs10777566	67.4704	94387329	A	G	0.02755	0.01999	-0.1056	0.03177	0.0003894	-0.13315
10	rs11004255	123.637	56122405	G	A	0.02562	0.0197	-0.108	0.03217	0.0003957	-0.13362
2	rs4664346	3.64699	161515983	G	A	-0.05175	0.02076	0.08601	0.03289	0.0003974	0.13776
16	rs8045339	80.12	84036681	G	A	0.03285	0.02944	-0.1682	0.04855	0.0003998	-0.20105
7	rs6465973	19.4462	77671200	G	A	0.06172	0.03285	-0.1546	0.05155	0.0004011	-0.21632
6	rs2057154	110.113	110662570	G	A	-0.03744	0.02145	0.1039	0.03369	0.0004021	0.14134
2	rs7589901	119.33	113993344	C	A	-0.04496	0.02075	0.09378	0.03327	0.0004031	0.13874
5	rs10941402	87.8594	38723307	A	G	-0.04982	0.01953	0.08234	0.03184	0.0004037	0.13216
4	rs11734172	82.6312	81648384	G	A	-0.0494	0.02325	0.105	0.03694	0.0004038	0.1544
12	rs1478290	159.74	21761315	C	A	-0.04459	0.02098	0.09769	0.03433	0.0004055	0.14228
9	rs1169758	105.155	29317769	A	G	0.02159	0.01965	-0.1096	0.03148	0.0004085	-0.13119
8	rs1450790	42.337	82289838	G	A	0.04105	0.02085	-0.09953	0.03388	0.0004096	-0.14058
16	rs444373	78.96	66892324	A	G	-0.03813	0.01967	0.09315	0.03153	0.0004112	0.13128
4	rs12512915	124.351	126119697	A	G	-0.098	0.03074	0.1047	0.04848	0.0004141	0.2027
1	rs11204915	10.2839	151882826	G	A	-0.07483	0.02045	0.05821	0.03165	0.0004147	0.13304
1	rs1065607	42.8512	211972775	G	A	0.08125	0.03225	-0.1347	0.052	0.000417	-0.21595
22	rs16983313	64.1743	27373538	A	C	-0.1046	0.0455	0.1913	0.0705	0.0004204	0.2959
10	rs7903170	51.1712	44223180	G	A	-0.02392	0.03491	0.2091	0.05612	0.0004214	0.23302
9	rs4744227	86.4244	96126075	A	G	-0.0339	0.01962	0.09866	0.03208	0.000424	0.13256
1	rs12045736	60.9874	12654035	A	G	-0.06001	0.01967	0.07149	0.03171	0.0004248	0.1315
9	rs3810908	78.7246	115928275	A	G	-0.03051	0.02592	0.1363	0.03961	0.0004261	0.16681
6	rs161070	74.5182	143785485	G	A	-0.03403	0.02975	0.1651	0.04807	0.0004288	0.19913
5	rs631069	85.0669	41699025	A	G	-0.0799	0.04224	0.1982	0.06673	0.0004293	0.2781
1	rs857788	74.6019	158785137	G	A	0.03024	0.01954	-0.102	0.0321	0.0004322	-0.13224
18	rs11564361	146.34	25904868	G	A	-0.02534	0.0231	0.1293	0.03738	0.0004326	0.15464
6	rs214544	135.276	18284716	A	G	0.06188	0.0374	-0.196	0.06304	0.0004357	-0.25788
6	rs17072752	183.361	143848143	C	A	-0.02842	0.03743	0.2183	0.05934	0.0004369	0.24672
6	rs2206819	155.64	77805227	C	A	0.05031	0.02753	-0.1331	0.04432	0.0004394	-0.18341
4	rs7682572	40.7009	139258276	G	A	0.03607	0.01979	-0.09334	0.03105	0.0004405	-0.12941
3	rs9853234	50.89	181935178	G	A	0.01162	0.02222	-0.1369	0.03596	0.0004427	-0.14852
11	rs16905753	57.2408	48285906	A	G	-0.03861	0.02797	0.1501	0.04595	0.0004513	0.18871
7	rs10499749	193.272	54801714	G	A	-0.0583	0.02426	0.1002	0.03813	0.000453	0.1585
12	rs7314394	23.8629	27152666	A	G	-0.07561	0.03428	0.1491	0.05418	0.0004576	0.22471
3	rs1320287	47.7604	175722327	A	G	-0.03857	0.05589	0.332	0.08989	0.0004634	0.37057
3	rs6810130	189.78	25898495	A	G	0.06779	0.02425	-0.09349	0.03919	0.0004662	-0.16128
6	rs9472114	39.5115	43695675	G	A	-0.03237	0.02249	0.119	0.03697	0.0004696	0.15137
10	rs12258494	102.69	44233503	G	A	-0.02519	0.03489	0.2047	0.05572	0.00047	0.22989
10	rs12246329	151.112	17059462	A	G	0.01016	0.02834	0.1979	0.04559	0.0004701	0.18774
5	rs2303059	214.614	159714528	G	A	0.09647	0.041	-0.1809	0.06789	0.0004706	-0.27737
12	rs4310669	149.551	110118995	A	G	-0.01505	0.02371	0.1414	0.03795	0.0004723	0.15645
1	rs17474256	70.0624	104524676	G	A	-0.07058	0.03387	0.151	0.05358	0.0004723	0.22158
18	rs12954459	161.325	8251933	A	G	-0.01423	0.02168	0.1268	0.03401	0.0004734	0.14103
5	rs1027348	122.137	41786266	A	G	-0.0852	0.04261	0.1908	0.0665	0.0004752	0.276
1	rs517237	44.5373	120284988	G	A	-0.04129	0.0199	0.09041	0.03201	0.0004758	0.1317
5	rs6879107	152.222	44051305	C	A	-0.04691	0.02903	0.1439	0.04634	0.0004829	0.19081
8	rs241166	83.4822	28657998	A	G	-0.04326	0.02579	0.1245	0.04058	0.0004842	0.16776
7	rs6952563	57.7461	128364895	G	A	0.05142	0.02852	-0.1338	0.04478	0.000485	-0.18522
3	rs13093663	24.3921	105122452	A	G	0.02778	0.02094	-0.1091	0.03317	0.0004867	-0.13688
7	rs10277267	115.668	1809120	A	G	-0.0422	0.02378	0.1122	0.03734	0.0004879	0.1544
7	rs296316	81.2256	52439967	A	G	0.03321	0.02337	-0.1197	0.03711	0.0004907	-0.15291
5	rs643505	169.068	41698513	A	G	-0.08332	0.04274	0.1937	0.06702	0.000491	0.27702
5	rs4310017	184.545	155066004	A	G	-0.02198	0.02088	0.1192	0.03473	0.0004928	0.14118
13	rs593564	95.028	110871759	A	G	-0.022	0.01948	0.1074	0.03163	0.0004932	0.1294
5	rs10062703	44.2414	41916688	C	A	-0.0853	0.04286	0.1927	0.06741	0.0005003	0.278
5	rs10064380	51.7827	41918947	G	A	-0.09134	0.04303	0.1866	0.06727	0.0005006	0.27794
13	rs9520845	122.025	108991004	G	A	-0.002979	0.0197	-0.1316	0.03127	0.0005029	-0.128621
6	rs6570251	154.184	138970367	G	A	-0.004184	0.02268	0.1419	0.03534	0.0005036	0.146084
20	rs4811336	73.1328	51002433	G	A	0.05166	0.02025	-0.08356	0.03319	0.0005055	-0.13522
13	rs944015	12.0539	20939005	A	G	-0.05071	0.0412	0.2252	0.0678	0.0005071	0.27591
2	rs1827746	39.5177	114999941	A	G	-0.01674	0.02076	0.1191	0.03311	0.0005076	0.13584
19	rs4362488	83.8199	33914944	G	A	0.04899	0.01998	-0.08258	0.03214	0.0005082	-0.13157
7	rs3779329	62.3061	77677237	A	G	0.06333	0.03351	-0.1596	0.05468	0.0005085	-0.22293
5	rs7719054	50.6913	78728923	G	A	0.003252	0.02558	0.1702	0.04065	0.0005096	0.166948
5	rs7706089	53.572	150138634	G	A	0.1039	0.04839	-0.2055	0.07476	0.0005102	-0.3094
6	rs4896378	106.217	138933559	C	A	-0.005313	0.02168	0.1354	0.03421	0.0005131	0.140713
9	rs12684544	55.5401	13510394	A	C	0.04424	0.02445	-0.1169	0.03944	0.0005152	-0.16114
8	rs7003440	175.906	135586279	G	A	-0.04717	0.02356	0.1087	0.03822	0.0005159	0.15587
12	rs12305107	88.4792	101440714	G	A	-0.02797	0.02996	0.1738	0.04983	0.0005198	0.20177
20	rs932472	63.2948	51199343	G	A	0.04444	0.03074	-0.1593	0.05004	0.0005223	-0.20374
16	rs152173	33.0489	66912552	A	C	-0.03878	0.01966	0.08986	0.03146	0.0005248	0.12864
2	rs13002648	93.1021	142164422	A	G	0.1459	0.05808	-0.2229	0.08912	0.0005263	-0.3688
4	rs1509951	166.181	94995494	G	A	-0.0318	0.02023	0.09751	0.03136	0.0005303	0.12931
5	rs4958133	10.4801	132991517	G	A	-0.02894	0.01975	0.09814	0.03091	0.0005314	0.12708
1	rs12566620	109.117	211920427	G	A	0.0798	0.03226	-0.1323	0.05206	0.0005327	-0.2121
1	rs4364936	124.109	212010527	G	A	0.07926	0.03218	-0.1322	0.05196	0.0005396	-0.21146
1	rs6685187	66.3249	151858888	A	G	-0.07372	0.02051	0.05701	0.03173	0.0005403	0.13073
6	rs760669	73.02	19561987	A	G	-0.02207	0.02183	0.1202	0.03486	0.0005411	0.14227
15	rs973410	44.1523	94530152	A	G	-0.06278	0.0194	0.06447	0.03126	0.0005422	0.12725
3	rs2289428	136.19	124412524	C	A	-0.03418	0.02482	0.1321	0.04118	0.0005438	0.16628
22	rs5992838	162.565	18264831	G	A	-0.01256	0.02037	0.1206	0.03267	0.0005439	0.13316
16	rs149156	172.888	66912706	G	A	-0.03835	0.01966	0.08994	0.03146	0.0005442	0.12829
11	rs11246020	3.17003	233067	A	G	0.06769	0.02442	-0.08991	0.03849	0.0005452	-0.1576
2	rs2139412	55.0653	115560289	A	G	0.02922	0.01988	-0.1013	0.0321	0.000546	-0.13052
7	rs17587111	185.3	46796519	G	A	-0.04057	0.02637	0.1314	0.04218	0.000547	0.17197
5	rs11952896	48.1568	150161038	A	G	0.1126	0.0493	-0.199	0.07547	0.0005474	-0.3116
2	rs744809	68.9	10789249	G	A	0.03566	0.0204	-0.09776	0.03277	0.0005475	-0.13342
3	rs9881131	37.8051	80912002	A	C	-0.04417	0.02144	0.0935	0.03357	0.0005476	0.13767
13	rs17121478	18.6007	113329401	A	G	-0.005958	0.02495	0.1563	0.03979	0.00055	0.162258
11	rs7939975	94.6991	37688427	C	A	-0.04125	0.01987	0.08861	0.03191	0.0005509	0.12986
13	rs7328831	116.553	103339709	A	G	-0.06938	0.042	0.2116	0.06964	0.0005511	0.28098
9	rs1128774	140.326	115925396	G	A	-0.02955	0.02589	0.1338	0.03961	0.000557	0.16335
7	rs4419752	89.32	115699678	G	A	0.04391	0.02273	-0.1023	0.03573	0.0005572	-0.14621
18	rs11151851	85.3048	70952073	G	A	0.06231	0.02687	-0.1136	0.04332	0.000558	-0.17591
4	rs1493177	89.0077	81667695	A	G	-0.04799	0.02307	0.1019	0.0368	0.000558	0.14989
20	rs8123919	132.828	50826346	A	G	0.05259	0.01995	-0.07804	0.03218	0.0005605	-0.13063
9	rs11794048	92.6244	115915194	G	A	0.02409	0.01969	-0.1024	0.03097	0.0005651	-0.12649
13	rs4943116	173.258	34097650	A	G	0.002167	0.01961	-0.1251	0.03128	0.0005662	-0.127267
5	rs10805539	36.0938	29931737	A	G	0.02468	0.02063	-0.1101	0.03323	0.0005689	-0.13478
8	rs7816628	69.8464	28943734	A	G	-0.03213	0.02179	0.1097	0.0349	0.0005697	0.14183
21	rs7283760	50.7835	45640629	A	G	0.02173	0.02122	-0.1176	0.03441	0.0005705	-0.13933
2	rs10184938	137.233	9913006	A	G	-0.03827	0.02575	0.1281	0.04085	0.0005706	0.16637
19	rs11672573	50.9943	33927742	G	A	0.053	0.03209	-0.1585	0.05235	0.0005716	-0.2115
14	rs6574857	118.22	86310164	A	G	-0.1236	0.06828	0.3732	0.127	0.0005719	0.4968
5	rs10076689	162.553	41907381	A	G	-0.09457	0.0435	0.1818	0.06742	0.000573	0.27637
6	rs12204525	185.352	45791913	A	G	0.04237	0.02022	-0.09325	0.0338	0.000574	-0.13562
1	rs2996494	221.36	201343638	G	A	0.1932	0.07858	-0.3735	0.1448	0.0005821	-0.5667
15	rs1258734	114.159	33067656	G	A	-0.07398	0.02109	0.06256	0.03364	0.0005837	0.13654
14	rs2886167	146.511	78311180	A	G	-0.03777	0.02091	0.09845	0.03367	0.0005884	0.13622
2	rs6713203	74.9371	203636012	A	G	0.06493	0.03255	-0.1455	0.05188	0.0005889	-0.21043
17	rs9902576	119.65	6170245	G	A	-0.1165	0.06331	0.3493	0.1199	0.0005905	0.4658
5	rs278496	116.408	100100157	A	G	-0.0623	0.02046	0.06936	0.03242	0.0005939	0.13166
21	rs13050861	101.485	42485808	G	A	0.05551	0.02413	-0.1024	0.03915	0.0005946	-0.15791
15	rs745636	47.4605	70457720	A	G	0.08152	0.02328	-0.0686	0.037	0.0005952	-0.15012
1	rs2279502	90.6259	151917652	G	A	-0.05823	0.02031	0.07046	0.03152	0.0005982	0.12869
9	rs10761209	48.6624	96077465	C	A	0.06798	0.02156	-0.0714	0.03444	0.0006018	-0.13938
18	rs4581794	162.87	70951212	G	A	0.06218	0.02684	-0.1123	0.04321	0.000603	-0.17448
19	rs4806934	0	3432252	G	A	0.008036	0.02057	-0.1258	0.03317	0.0006035	-0.133836
5	rs11167733	189.576	155049089	A	G	-0.01772	0.02084	0.1211	0.03471	0.0006048	0.13882
14	rs17826506	47.7075	95089709	G	A	0.08881	0.02881	-0.09568	0.04543	0.0006055	-0.18449
11	rs588700	75.5256	48449889	A	G	-0.03373	0.02421	0.1287	0.04073	0.0006065	0.16243
6	rs7774918	31.284	138893460	G	A	-0.03967	0.05001	0.2805	0.07885	0.0006066	0.32017
8	rs7817551	49.2773	13438708	G	A	0.05514	0.03167	-0.1579	0.05345	0.0006068	-0.21304
15	rs3751586	32.9374	51677259	G	A	0.09588	0.02445	-0.05904	0.03801	0.0006081	-0.15492
10	rs4080021	3.76891	44268654	G	A	-0.02072	0.03499	0.2047	0.05572	0.0006114	0.22542
9	rs615544	55.2787	21383734	A	C	-0.05273	0.03124	0.1481	0.04961	0.0006138	0.20083
18	rs16975731	33.2099	39763575	G	A	-0.02277	0.02881	0.1692	0.04808	0.0006141	0.19197
19	rs12610693	50.1511	11139636	A	C	-0.03799	0.02063	0.09567	0.03312	0.0006142	0.13366
16	rs6500700	139.642	5636061	A	C	-0.07324	0.02895	0.1177	0.04767	0.0006162	0.19094
5	rs17458304	142.674	113804486	A	G	-0.07198	0.03446	0.1459	0.0535	0.0006194	0.21788
5	rs6866871	91.4076	54915930	A	G	-0.1357	0.04909	0.1885	0.08103	0.0006205	0.3242
6	rs9495144	52.1812	138900935	G	A	-0.03948	0.05022	0.2827	0.07963	0.0006213	0.32218
10	rs10887188	96.864	85709761	G	A	0.07151	0.04325	-0.1999	0.06649	0.0006233	-0.27141
7	rs6583546	14.1173	48336844	G	A	-0.04773	0.02056	0.08476	0.03282	0.0006241	0.13249
4	rs17714421	149.214	29299647	G	A	0.02978	0.01964	-0.09709	0.03146	0.0006249	-0.12687
20	rs2749813	105.989	23062984	A	G	-0.02497	0.0207	0.1096	0.03345	0.0006255	0.13457
7	rs664112	62.9498	71148103	A	G	-0.06549	0.02225	0.07916	0.03597	0.0006264	0.14465
11	rs2510877	38.3861	120412867	C	A	0.03725	0.02195	-0.1041	0.03503	0.0006287	-0.14135
6	rs9484186	105.486	138929434	A	G	0.003795	0.02422	0.1588	0.03835	0.0006326	0.155005
19	rs11881006	22.7308	51032396	A	G	0.02427	0.02804	-0.1556	0.04454	0.0006332	-0.17987
14	rs11846930	118.39	62557328	A	G	-0.06988	0.04051	0.1781	0.06024	0.000636	0.24798
1	rs903050	55.4329	111098766	G	A	0.04569	0.03165	-0.1598	0.05118	0.0006367	-0.20549
11	rs11215954	56.4755	116348066	A	C	0.04767	0.02347	-0.1022	0.03707	0.0006377	-0.14987
18	rs12456839	130.646	25895735	A	G	-0.02241	0.02311	0.1274	0.03728	0.000638	0.14981
20	rs1883999	190.991	51210063	A	G	0.04033	0.03075	-0.16	0.04999	0.0006413	-0.20033
22	rs132667	77.3452	36565029	G	A	0.06725	0.01992	-0.05859	0.03102	0.0006417	-0.12584
2	rs17016433	247.196	79404926	A	G	-0.0185	0.02513	0.1426	0.03998	0.0006433	0.1611
19	rs6510383	118.39	33918787	G	A	0.03441	0.02405	-0.1219	0.03901	0.0006446	-0.15631
16	rs152168	125.442	66886559	A	G	-0.01869	0.01997	0.1106	0.03221	0.0006449	0.12929
18	rs608955	112.737	55043782	A	G	0.06923	0.03056	-0.1273	0.04888	0.0006519	-0.19653
10	rs149624	27.9316	80344742	A	G	-0.04	0.03605	0.1972	0.05954	0.0006539	0.2372
12	rs10778078	59.4286	101195088	A	G	0.06946	0.02174	-0.0706	0.03489	0.0006565	-0.14006
19	rs43211	99.2866	54652203	A	G	0.05361	0.02483	-0.1071	0.04012	0.0006576	-0.16071
10	rs10490967	64.57	52702677	G	A	0.04875	0.0208	-0.0849	0.03329	0.0006612	-0.13365
16	rs2283530	106.625	22879917	A	G	0.1133	0.04487	-0.1684	0.06949	0.0006616	-0.2817
9	rs1078868	44.6867	78915454	A	G	-0.01362	0.02262	0.1323	0.0364	0.0006635	0.14592
6	rs6570248	45.3519	138966214	G	A	-0.005338	0.02268	0.1379	0.03545	0.0006672	0.143238
3	rs1501202	67.9422	134961213	A	G	-0.02896	0.02525	0.1339	0.04066	0.0006673	0.16286
11	rs10838833	35.0769	48238880	A	G	-0.03878	0.02815	0.1443	0.04586	0.0006683	0.18308
4	rs10857170	189.061	81430314	G	A	-0.05248	0.02664	0.1159	0.0417	0.0006684	0.16838
11	rs717897	122.755	48375604	A	G	-0.03262	0.02422	0.1283	0.04063	0.0006697	0.16092
16	rs7194802	227.48	60665097	C	A	0.06198	0.02369	-0.09066	0.03811	0.0006698	-0.15264
9	rs10811482	75.1427	21153985	G	A	0.06723	0.02322	-0.08243	0.03737	0.0006702	-0.14966
4	rs1507500	146.896	147993702	G	A	-0.01069	0.03485	0.2069	0.05365	0.0006711	0.21759
5	rs2011105	14.7936	42019110	G	A	-0.06826	0.04069	0.1861	0.06275	0.0006714	0.25436
9	rs4744201	0.6576	96015256	G	A	0.03911	0.01974	-0.08851	0.03192	0.000672	-0.12762
5	rs10071236	155.376	150140140	A	G	0.09938	0.04826	-0.2013	0.0741	0.0006734	-0.30068
2	rs12467106	102.656	79447701	A	G	-0.02101	0.02639	0.1458	0.04137	0.0006739	0.16681
17	rs231005	59.7343	15099023	G	A	0.01365	0.02083	-0.1206	0.03356	0.0006743	-0.13425
12	rs10778077	47.9821	101193988	G	A	0.06919	0.02171	-0.0703	0.03481	0.0006745	-0.13949
5	rs827782	18.4654	169833843	A	G	-0.04577	0.02871	0.1338	0.04439	0.000681	0.17957
10	rs3851552	32.5872	49799453	G	A	-0.02301	0.0204	0.1065	0.03221	0.0006825	0.12951
18	rs11151852	88.25	70952783	A	G	0.06401	0.02711	-0.1102	0.04357	0.0006853	-0.17421
7	rs4917078	81.7601	48385877	G	A	-0.03339	0.02628	0.1366	0.04262	0.0006865	0.16999
3	rs2138110	54.1681	80654883	A	C	-0.04557	0.02159	0.09141	0.0341	0.0006894	0.13698
19	rs11672472	148.032	33977370	A	G	0.04746	0.03229	-0.1621	0.05262	0.0006897	-0.20956
3	rs7431461	202.663	80599812	A	G	-0.04652	0.02158	0.09041	0.03412	0.000694	0.13693
5	rs7707639	9.33045	55010963	A	G	-0.1244	0.04812	0.1927	0.08014	0.0006947	0.3171
5	rs4703116	279.167	100128913	G	A	-0.06434	0.02041	0.06581	0.0325	0.0006951	0.13015
1	rs12568672	104.28	66411430	G	A	0.09288	0.06401	-0.3366	0.1093	0.0006987	-0.42948
3	rs7431531	33.803	105198374	G	A	0.0222	0.02093	-0.1116	0.03347	0.0007025	-0.1338
7	rs1608875	184.93	71154079	A	G	-0.06556	0.0222	0.07744	0.03589	0.0007025	0.143
1	rs543703	63.1201	120285546	G	A	0.04205	0.021	-0.09233	0.03364	0.0007029	-0.13438
7	rs10272635	156.314	39874986	G	A	0.002781	0.02119	-0.1322	0.03376	0.0007075	-0.134981
6	rs7767721	116.329	9789093	A	C	0.04694	0.03044	-0.1438	0.04737	0.0007076	-0.19074
1	rs532208	106.691	120292279	A	C	-0.03702	0.01987	0.09034	0.03193	0.0007086	0.12736
11	rs3901366	130.918	120408071	A	G	0.0477	0.0217	-0.09107	0.03477	0.0007101	-0.13877
7	rs1005311	18.7233	39880053	G	A	0.004757	0.02107	-0.1296	0.03366	0.0007147	-0.134357
16	rs11074811	159.553	26957696	G	A	-0.01862	0.02729	0.1505	0.04188	0.0007164	0.16912
4	rs2047039	85.0391	81735968	G	A	-0.05187	0.02303	0.09474	0.03671	0.0007176	0.14661
11	rs4980335	97.6191	221824	A	G	0.06541	0.02443	-0.08862	0.03843	0.0007188	-0.15403
2	rs1529788	102.881	79447879	G	A	-0.02114	0.02639	0.1447	0.04136	0.0007213	0.16584
2	rs6744162	12.2847	66060863	G	A	0.01558	0.0225	-0.1271	0.0357	0.0007246	-0.14268
5	rs10077481	108.015	41918457	A	G	-0.08445	0.0428	0.1844	0.06705	0.0007253	0.26885
3	rs3864096	24.07	186937276	G	A	0.06264	0.03541	-0.1639	0.05692	0.0007266	-0.22654
3	rs2363518	83.8496	24942213	G	A	0.02439	0.02138	-0.1099	0.03351	0.0007285	-0.13429
6	rs1577619	219.957	142276494	A	G	0.0386	0.02225	-0.1065	0.03675	0.0007326	-0.1451
4	rs4082347	128.063	115919123	G	A	-0.06421	0.04202	0.1948	0.06419	0.0007364	0.25901
5	rs2231910	9.86476	41924949	G	A	-0.08419	0.04279	0.1842	0.06704	0.0007376	0.26839
1	rs6537748	101.553	113214381	C	A	-0.02131	0.01982	0.1046	0.03163	0.0007425	0.12591
13	rs2225275	63.81	20943224	A	G	-0.03209	0.0421	0.2413	0.06926	0.0007439	0.27339
6	rs12197645	67.8584	142259172	A	G	0.03952	0.02228	-0.1056	0.03681	0.0007466	-0.14512
14	rs162640	152.888	83821807	A	G	-0.008245	0.05432	-0.3801	0.09597	0.0007471	-0.371855
10	rs10906625	114.772	14238978	C	A	-0.02116	0.02039	0.1059	0.03169	0.0007485	0.12706
2	rs1478581	246.207	218292652	A	G	0.03039	0.02631	-0.1351	0.04145	0.0007488	-0.16549
9	rs10761224	99.7955	96166579	G	A	0.03654	0.0198	-0.08927	0.03165	0.0007522	-0.12581
2	rs17483267	193.606	40224494	A	G	-0.05827	0.02375	0.09399	0.03845	0.0007539	0.15226
2	rs10173681	62.8524	47057325	G	A	0.02525	0.02228	-0.117	0.03587	0.0007541	-0.14225
8	rs10888085	72.6505	14037030	G	A	-0.05363	0.0219	0.08938	0.03638	0.0007576	0.14301
11	rs1483118	147.496	48376650	C	A	-0.03233	0.02422	0.1269	0.04063	0.0007611	0.15923
17	rs230929	27.79	15121520	G	A	0.01324	0.02061	-0.1179	0.03306	0.0007612	-0.13114
22	rs8140558	77.5489	46440273	G	A	0.04712	0.02025	-0.08399	0.03327	0.0007614	-0.13111
7	rs3857714	77.7614	22073513	A	G	-0.04586	0.03735	0.1825	0.05664	0.0007624	0.22836
17	rs11078298	139.812	15317059	A	G	0.01621	0.03054	-0.1705	0.04637	0.0007691	-0.18671
21	rs2838737	120.817	46335580	A	G	-0.02534	0.02659	0.1481	0.04424	0.0007764	0.17344
14	rs7143785	86.6607	79171473	A	G	0.01683	0.02423	-0.1357	0.03838	0.0007801	-0.15253
3	rs12630978	230.636	80536788	A	G	-0.04633	0.02158	0.0894	0.03416	0.0007819	0.13573
5	rs10045473	25.9619	41943776	A	G	-0.08191	0.04341	0.1876	0.0675	0.0007847	0.26951
16	rs8056716	74.9497	13643974	A	G	0.04007	0.0204	-0.08804	0.03225	0.0007873	-0.12811
7	rs6974358	74.8551	9680160	A	G	0.00817	0.02516	-0.1537	0.04112	0.0007883	-0.16187
18	rs2040176	74.1826	892467	G	A	-0.03115	0.0275	0.1455	0.04487	0.0007892	0.17665
4	rs11573768	237.669	70718083	C	A	-0.3532	0.1147	0.3934	0.1906	0.0007913	0.7466
14	rs1538904	172.637	50857973	G	A	0.01809	0.02229	-0.121	0.03497	0.0007942	-0.13909
18	rs221853	33.0371	55052519	G	A	0.06888	0.03057	-0.1246	0.04891	0.0007956	-0.19348
9	rs13293217	10.9829	96082919	G	A	0.04221	0.01983	-0.08466	0.03222	0.000797	-0.12687
4	rs17486233	41.8025	115787479	A	G	-0.04071	0.03803	0.1992	0.06061	0.0008007	0.23991
6	rs1970352	262.391	143861900	A	G	0.001214	0.02492	0.1612	0.04071	0.0008027	0.159986
1	rs1417584	71.9669	231819050	G	A	-0.03266	0.01976	0.09248	0.03168	0.0008038	0.12514
4	rs4863054	67.7034	189508238	G	A	-0.06077	0.03042	0.1358	0.05016	0.0008038	0.19657
2	rs12473869	30.9656	130457465	A	G	0.03328	0.01977	-0.09362	0.0323	0.0008053	-0.1269
8	rs12678874	60.787	55832055	A	G	-0.0335	0.02195	0.1045	0.03486	0.0008061	0.138
5	rs10059424	32.22	41906206	G	A	-0.08263	0.04282	0.1839	0.06705	0.0008077	0.26653
2	rs976394	136.554	66094705	C	A	0.03745	0.02525	-0.122	0.04034	0.0008087	-0.15945
1	rs6657868	20.7535	65913707	A	G	-0.02074	0.02043	0.1077	0.03245	0.0008105	0.12844
5	rs10515523	161.35	142972893	A	G	0.05351	0.0331	-0.1548	0.05265	0.0008112	-0.20831
10	rs164247	13.7948	80338908	A	G	-0.04359	0.0362	0.1905	0.05981	0.0008117	0.23409
11	rs7483847	64.7922	17692011	A	G	-0.05158	0.02373	0.09852	0.03803	0.000812	0.1501
18	rs2849460	41.567	55052923	G	A	0.06857	0.03057	-0.1246	0.04891	0.000812	-0.19317
5	rs356065	29.51	173655405	G	A	0.03078	0.02184	-0.1075	0.03506	0.0008122	-0.13828
12	rs7959737	86.679	110150552	A	G	-0.03159	0.02297	0.1131	0.03661	0.0008124	0.14469
10	rs2860750	80.3235	95973747	G	A	0.04391	0.02006	-0.08285	0.03211	0.0008144	-0.12676
19	rs4239576	153.715	33915360	G	A	0.06319	0.02133	-0.07285	0.03459	0.0008146	-0.13604
11	rs11224829	35.3386	101412875	A	G	0.04793	0.037	-0.1902	0.06076	0.0008156	-0.23813
6	rs17812683	124.472	74092923	A	G	-0.05497	0.02174	0.08339	0.03516	0.0008158	0.13836
9	rs17617922	152.059	73936166	A	G	-0.0154	0.02813	0.163	0.04527	0.0008158	0.1784
6	rs9341423	114.092	74167406	A	G	-0.008395	0.02032	0.1206	0.03275	0.0008172	0.128995
7	rs1547473	80.5814	52517562	G	A	0.0245	0.02197	-0.1136	0.03495	0.0008185	-0.1381
11	rs1508098	110.403	116338899	G	A	0.03791	0.0217	-0.09914	0.03474	0.000819	-0.13705
2	rs7425164	115.157	16784998	A	G	-0.02639	0.02015	0.1003	0.03205	0.0008199	0.12669
18	rs9944971	4.28884	56356856	G	A	0.0186	0.02219	-0.1235	0.03621	0.0008207	-0.1421
22	rs3788723	131.627	46905533	A	G	0.03789	0.02132	-0.09708	0.03425	0.0008211	-0.13497
17	rs9906432	63.5268	528868	G	A	-0.02717	0.02519	0.1346	0.04128	0.0008215	0.16177
2	rs11679137	98.3866	30480027	A	G	-0.03473	0.02219	0.103	0.03467	0.0008238	0.13773
3	rs1383407	78.78	78908171	G	A	0.006309	0.01969	0.1327	0.03228	0.0008253	0.126391
5	rs4416606	138.96	83986193	G	A	-0.05129	0.02552	0.1051	0.0392	0.0008255	0.15639
10	rs164232	96.2068	80328687	G	A	-0.04572	0.03619	0.1879	0.05977	0.0008264	0.23362
3	rs6798944	78.6709	126109485	G	A	0.0756	0.02393	-0.07405	0.03782	0.0008271	-0.14965
12	rs12316219	83.1548	101446085	G	A	-0.03518	0.02759	0.1413	0.045	0.0008287	0.17648
12	rs1163263	51.4899	81113830	A	G	0.06982	0.03748	-0.1715	0.06171	0.0008295	-0.24132
8	rs6994715	44.5292	142530251	A	G	-0.03397	0.01969	0.09166	0.03202	0.0008316	0.12563
10	rs17093770	1.97271	92830260	A	C	0.05403	0.02621	-0.1086	0.041	0.0008336	-0.16263
16	rs7193624	34.5349	77574020	G	A	-0.06214	0.02728	0.1079	0.04298	0.0008347	0.17004
2	rs993468	133.698	66095536	C	A	0.03909	0.0253	-0.1196	0.04021	0.0008357	-0.15869
15	rs11071200	198.479	55950082	A	C	0.02323	0.02389	-0.1245	0.03721	0.0008361	-0.14773
4	rs10517266	146.592	53549643	G	A	0.01722	0.03387	-0.1913	0.05246	0.0008371	-0.20852
9	rs4745304	208.031	76845371	A	G	0.04578	0.02071	-0.08494	0.03321	0.0008381	-0.13072
11	rs574223	235.169	116329043	C	A	0.03116	0.01948	-0.09149	0.03113	0.0008389	-0.12265
16	rs889814	11.7062	12544425	A	C	-0.02879	0.02073	0.102	0.03323	0.0008442	0.13079
22	rs5750121	51.48	35976572	A	G	-0.05003	0.02736	0.1175	0.04209	0.0008476	0.16753
21	rs2826672	0.281008	22503372	A	G	-0.03152	0.01991	0.09365	0.0318	0.0008488	0.12517
7	rs3750046	64.1698	76959815	G	A	0.008278	0.02141	-0.1264	0.03421	0.0008497	-0.134678
18	rs10502557	146.387	28628256	C	A	-0.05431	0.02301	0.09126	0.03709	0.0008511	0.14557
1	rs743111	23.7083	94388569	G	A	-0.04266	0.01957	0.0806	0.03136	0.0008534	0.12326
2	rs6760588	126.188	234572783	C	A	0.03399	0.02223	-0.1063	0.03573	0.0008605	-0.14029
5	rs7710353	120.131	42220979	C	A	-0.05524	0.04031	0.1939	0.06297	0.0008612	0.24914
6	rs4521580	95.1764	23421034	G	A	-0.03582	0.02002	0.09174	0.03263	0.0008628	0.12756
10	rs10904481	118.66	5415954	G	A	-0.01516	0.02193	0.125	0.03589	0.0008645	0.14016
3	rs7631866	75.7935	80575042	C	A	-0.0464	0.02156	0.08816	0.03416	0.0008645	0.13456
15	rs8024587	108.441	90680136	A	G	-0.02224	0.01982	0.1023	0.03173	0.0008681	0.12454
13	rs1325788	65.0131	22039671	A	G	0.009383	0.02396	-0.1424	0.03877	0.0008701	-0.151783
1	rs2932586	106.897	151922808	G	A	-0.05338	0.0203	0.07151	0.03156	0.0008727	0.12489
1	rs12079489	128.08	204628101	A	G	-0.09636	0.04614	0.1924	0.07347	0.0008733	0.28876
9	rs16907545	91.2163	121469510	G	A	-0.05554	0.0349	0.1724	0.05892	0.0008744	0.22794
14	rs2069970	61.4902	95053286	A	G	-0.08038	0.03338	0.1268	0.05257	0.0008762	0.20718
19	rs507905	76.5643	3185563	G	A	0.05083	0.01978	-0.07377	0.0318	0.0008776	-0.1246
3	rs9872004	53.1318	172321976	G	A	0.08791	0.04256	-0.1823	0.06922	0.000881	-0.27021
16	rs8045344	80.3582	68435906	G	A	-0.04172	0.02207	0.09971	0.03635	0.0008822	0.14143
5	rs1529476	64.7111	150167118	G	A	0.1053	0.04895	-0.1924	0.07497	0.0008834	-0.2977
6	rs11967863	152.982	135837851	A	C	-0.1235	0.06941	0.3244	0.1155	0.0008838	0.4479
19	rs507872	40.3054	3185553	G	A	0.0535	0.01988	-0.07153	0.03193	0.0008852	-0.12503
22	rs2009681	103.745	35976171	G	A	-0.05004	0.02734	0.1168	0.04208	0.0008854	0.16684
5	rs4277860	174.969	67475952	G	A	-0.04131	0.02994	0.148	0.04845	0.0008856	0.18931
5	rs4516825	4.9136	75810243	C	A	0.05926	0.02271	-0.08415	0.03668	0.000888	-0.14341
4	rs12648912	12.9888	108517790	C	A	0.02908	0.01975	-0.0946	0.03154	0.0008902	-0.12368
19	rs17531264	71.8372	33897223	G	A	0.0406	0.02775	-0.134	0.04463	0.0008939	-0.1746
5	rs17111302	48.6153	150102244	G	A	0.1039	0.04839	-0.1905	0.07428	0.0008954	-0.2944
10	rs158289	30.8863	80329506	G	A	-0.04305	0.03617	0.189	0.05977	0.0008967	0.23205
6	rs1535507	163.869	43711981	A	G	-0.05808	0.02672	0.1131	0.04407	0.0008972	0.17118
2	rs7583781	108.813	206808059	G	A	-0.05782	0.02133	0.0736	0.03336	0.0009038	0.13142
4	rs10021442	22.1598	47589896	G	A	-0.06116	0.03472	0.1693	0.06016	0.0009089	0.23046
12	rs7974914	77.5562	17927602	A	G	-0.01064	0.02017	0.1159	0.0324	0.0009111	0.12654
10	rs11014511	106.287	18787195	G	A	0.02564	0.03056	-0.1673	0.04952	0.000913	-0.19294
4	rs7655196	130	183880034	G	A	-0.03212	0.03406	0.1852	0.05603	0.0009173	0.21732
10	rs7069316	22.42	96000282	G	A	0.03983	0.02002	-0.08495	0.03189	0.0009184	-0.12478
14	rs10145477	16.5213	43203919	C	A	-0.05575	0.02762	0.1193	0.04502	0.0009206	0.17505
6	rs9443353	139.149	77825472	A	G	0.04668	0.02769	-0.1278	0.0448	0.0009228	-0.17448
4	rs12501064	89.1659	189525837	G	A	-0.1463	0.05356	0.1818	0.08332	0.0009229	0.3281
14	rs10149693	74.6373	94494601	A	C	-0.05873	0.02196	0.08011	0.03572	0.000929	0.13884
4	rs1470618	55.1945	111510571	A	G	-0.03082	0.02453	0.1214	0.03887	0.0009299	0.15222
22	rs8137493	147.475	46448819	G	A	0.03618	0.0197	-0.08908	0.0323	0.0009309	-0.12526
12	rs703817	83.9557	57489828	G	A	-0.02087	0.01957	0.1024	0.03167	0.000931	0.12327
11	rs11601331	27.7381	44851822	A	G	0.04577	0.04038	-0.2025	0.06322	0.0009329	-0.24827
3	rs2667706	4.6623	189877157	G	A	0.03686	0.02728	-0.1343	0.04393	0.0009344	-0.17116
16	rs412284	114.635	83774014	A	G	-0.03206	0.02172	0.1027	0.03446	0.0009376	0.13476
6	rs7758456	46.0497	7638095	G	A	0.06068	0.02202	-0.07705	0.03533	0.0009384	-0.13773
3	rs6780238	73.1	105134490	A	C	0.03255	0.02045	-0.09538	0.03283	0.0009409	-0.12793
2	rs1439975	143.779	7620637	C	A	-0.04292	0.02083	0.08742	0.03347	0.0009467	0.13034
2	rs4516492	46.6143	137055404	G	A	0.04208	0.02254	-0.09738	0.03567	0.0009484	-0.13946
12	rs1194049	63.81	127253943	A	G	0.04133	0.02094	-0.09001	0.03377	0.0009486	-0.13134
5	rs27056	107.829	1473977	A	G	-0.03409	0.02223	0.104	0.03538	0.0009509	0.13809
2	rs4546035	17.3843	3302962	A	G	-0.006411	0.02239	0.1343	0.03624	0.0009523	0.140711
5	rs370652	79.4127	131312327	C	A	-0.02056	0.02569	0.1433	0.0424	0.0009528	0.16386
8	rs11994775	148.841	120127586	A	G	-0.03814	0.02004	0.0859	0.03175	0.0009531	0.12404
8	rs10095864	40.4295	4881304	C	A	-0.05257	0.01958	0.0697	0.03141	0.000954	0.12227
17	rs434307	77.9149	554080	G	A	-0.0314	0.0274	0.1401	0.04411	0.0009577	0.1715
3	rs12488994	78.9577	105129061	A	G	0.03261	0.02044	-0.0952	0.03287	0.0009603	-0.12781
10	rs956794	76.7243	52154517	A	G	-0.08925	0.04961	0.2137	0.07721	0.0009641	0.30295
11	rs7110240	128.579	116343848	G	A	0.03986	0.0222	-0.09768	0.03528	0.0009688	-0.13754
2	rs3132038	86.8434	114996082	A	G	-0.02089	0.02116	0.1117	0.03415	0.0009695	0.13259
13	rs9601605	108.877	81959008	A	G	-0.1394	0.07418	0.3286	0.1209	0.0009704	0.468
5	rs440970	160.544	131336287	C	A	-0.01561	0.0204	0.108	0.03144	0.0009704	0.12361
10	rs976936	56.6182	11090917	A	G	-0.01983	0.03186	0.1722	0.04871	0.0009714	0.19203
5	rs10076380	23.8318	44088038	G	A	-0.04155	0.02945	0.1413	0.04697	0.0009717	0.18285
2	rs9309116	21.3838	44557919	G	A	0.03779	0.02083	-0.09041	0.03282	0.0009738	-0.1282
12	rs4765633	118.286	125357016	A	G	0.0214	0.01973	-0.1037	0.03241	0.0009774	-0.1251
5	rs12523086	47.1575	83983783	A	G	-0.04913	0.02559	0.1054	0.03929	0.0009795	0.15453
12	rs4762978	15.4766	20791982	G	A	0.0246	0.02141	-0.1088	0.03436	0.0009801	-0.1334
6	rs12527897	101.496	7632243	G	A	0.05788	0.022	-0.07934	0.03536	0.0009822	-0.13722
13	rs9506987	51.9214	23556694	A	G	-0.0176	0.02602	0.1459	0.04223	0.0009827	0.1635
3	rs17074496	114.308	42515965	A	G	0.0703	0.04176	-0.1811	0.06387	0.0009856	-0.2514
2	rs3791425	59.0295	240039119	C	A	-0.03029	0.02639	0.1337	0.04223	0.000988	0.16399
2	rs11679132	8.59046	30479992	A	C	-0.03472	0.02218	0.1006	0.0346	0.0009893	0.13532
20	rs6076019	32.8188	23064279	G	A	-0.01617	0.01974	0.106	0.03142	0.0009896	0.12217
1	rs9943251	66.4696	151917115	A	G	-0.04572	0.02107	0.08349	0.0331	0.0009924	0.12921
9	rs10815647	200.211	7607425	G	A	-0.04975	0.02138	0.08196	0.03381	0.0009946	0.13171
2	rs17043657	100.646	22568473	G	A	-0.131	0.04695	0.151	0.07165	0.0009949	0.282
7	rs11767151	170.594	115671435	G	A	0.04469	0.02284	-0.09522	0.03585	0.0009963	-0.13991
20	rs6137821	12.1676	23067799	G	A	-0.01357	0.01973	0.1084	0.03139	0.0009999	0.12197
1	rs13320	10.6112	151846517	G	A	-0.07836	0.02047	0.04584	0.03172	0.001001	0.1242
1	rs12091814	49.1101	165098287	G	A	-0.04965	0.03082	0.1537	0.05357	0.001002	0.20335
6	rs1006257	78.5945	142278682	G	A	0.0412	0.0221	-0.09929	0.03653	0.001002	-0.14049
5	rs12653537	233.15	150158164	G	C	0.0944	0.0484	-0.1972	0.07427	0.001003	-0.2916
3	rs2280677	183.705	126113127	G	A	0.07429	0.0239	-0.07239	0.03765	0.001005	-0.14668
14	rs17106478	37.7332	78328310	A	G	-0.03781	0.02418	0.112	0.03861	0.00101	0.14981
13	rs4772782	155.962	107062167	A	G	0.0275	0.0197	-0.09527	0.03173	0.001012	-0.12277
18	rs8086224	58.8518	76041134	C	A	-0.06711	0.02446	0.08512	0.03932	0.001012	0.15223
8	rs171313	69.3543	28643722	A	G	-0.01322	0.0207	0.1169	0.03374	0.001012	0.13012
6	rs2787933	61.6717	88420902	A	G	0.05793	0.02251	-0.08268	0.03639	0.001015	-0.14061
17	rs4128645	128.368	10082169	A	G	0.007852	0.03467	-0.2088	0.05607	0.001017	-0.216652
1	rs7411090	119.641	177762940	G	A	-0.05524	0.02004	0.07058	0.03263	0.001019	0.12582
12	rs10505729	44.3413	4416085	G	A	-0.0449	0.02091	0.08514	0.03361	0.001021	0.13004
2	rs7597777	82.3246	138888963	A	C	0.09363	0.03127	-0.09637	0.04867	0.001023	-0.19
18	rs1943214	12.7683	58009426	A	G	-0.02724	0.02818	0.1498	0.04596	0.001024	0.17704
13	rs9317361	65.9435	23557407	A	G	0.03415	0.02078	-0.09604	0.03377	0.001026	-0.13019
9	rs2182318	34.47	37641833	G	A	-0.05307	0.02964	0.1261	0.04584	0.001028	0.17917
22	rs10483246	89.9755	49683905	A	G	0.03278	0.02159	-0.09798	0.03349	0.001033	-0.13076
12	rs12826091	125.226	26563399	G	A	-0.05116	0.01999	0.07273	0.03204	0.001035	0.12389
22	rs5992751	110.711	18080154	G	A	-0.01482	0.02224	0.1217	0.03517	0.001036	0.13652
12	rs3217830	118.607	4392530	A	G	0.06042	0.02061	-0.068	0.03329	0.001037	-0.12842
9	rs1359741	106.591	22336954	A	G	-0.02317	0.01978	0.09944	0.03172	0.001039	0.12261
14	rs2693693	46.3312	99676186	A	G	-0.1219	0.03995	0.1297	0.0655	0.00104	0.2516
9	rs2889274	80.1204	76872628	A	G	0.04471	0.02069	-0.08303	0.03301	0.001041	-0.12774
6	rs2295085	109.488	88240047	G	A	0.05159	0.02375	-0.09553	0.03807	0.001042	-0.14712
1	rs17131325	183.719	91620137	A	G	-0.1655	0.08229	0.3418	0.1311	0.001047	0.5073
7	rs1404887	111.141	53165642	C	A	-0.01301	0.02445	0.1407	0.04003	0.001048	0.15371
18	rs1944017	167.102	76032305	A	C	0.03889	0.0197	-0.08229	0.0313	0.00105	-0.12118
10	rs7078243	237.553	94414263	A	C	-0.0412	0.01992	0.07961	0.03104	0.001053	0.12081
17	rs8082538	92.504	9300195	G	A	-0.0281	0.01969	0.09488	0.03196	0.001053	0.12298
1	rs17128166	26.5993	66438365	G	A	0.07751	0.06376	-0.3371	0.1093	0.001054	-0.41461
4	rs4392546	171.451	185830781	A	G	0.04753	0.02433	-0.1062	0.04012	0.001054	-0.15373
8	rs11204050	45.6717	19355978	A	G	-0.04263	0.02142	0.08765	0.03351	0.001054	0.13028
11	rs10792584	64.1667	81376074	C	A	-0.03828	0.02084	0.0887	0.0327	0.001056	0.12698
5	rs7734716	30.7679	53707175	A	G	-0.04333	0.02307	0.1005	0.03738	0.001061	0.14383
2	rs3789724	51.4744	113313794	G	A	0.07144	0.03395	-0.1347	0.05304	0.001063	-0.20614
5	rs4245983	216.455	42231896	G	A	-0.05217	0.04018	0.1918	0.06279	0.001063	0.24397
1	rs7520019	242.477	94400045	G	A	-0.04217	0.01958	0.07877	0.03134	0.001066	0.12094
4	rs10957824	80.1905	122211103	A	C	0.03802	0.02862	-0.1305	0.04282	0.001066	-0.16852
3	rs2372735	3.34898	81012204	A	G	-0.03763	0.02135	0.0922	0.03345	0.001069	0.12983
10	rs12256183	82.0037	7622047	A	G	-0.09577	0.03436	0.1202	0.05637	0.00107	0.21597
1	rs10925300	174.619	237216900	A	G	-0.06706	0.03496	0.157	0.05891	0.001073	0.22406
18	rs4545915	44.554	56422868	A	G	0.02324	0.02333	-0.1215	0.03763	0.001077	-0.14474
12	rs1044931	3.69949	57449810	A	G	0.01769	0.01976	-0.1034	0.03135	0.001079	-0.12109
19	rs421505	16.3908	44496145	G	A	-0.003058	0.0222	0.1347	0.03582	0.001082	0.137758
5	rs2867327	68.16	133001245	G	A	0.03483	0.01964	-0.08596	0.03131	0.001084	-0.12079
3	rs9865909	43.113	6102823	G	A	-0.05353	0.01991	0.07252	0.03305	0.001087	0.12605
20	rs2153934	14.1751	60389846	A	C	-0.01666	0.02149	0.1158	0.03438	0.001089	0.13246
5	rs666581	93.9034	42152335	A	C	-0.05176	0.04026	0.1918	0.06279	0.001091	0.24356
9	rs10821123	149.544	96169561	A	G	-0.04741	0.02003	0.07686	0.03235	0.001091	0.12427
13	rs9555639	192.178	110498334	G	A	-0.02805	0.03654	0.1913	0.05639	0.001093	0.21935
1	rs11808316	80.3924	11619154	A	G	0.0218	0.02722	-0.1439	0.04283	0.001095	-0.1657
3	rs12491058	202.694	59542556	A	G	0.01638	0.02209	-0.1215	0.03601	0.001096	-0.13788
12	rs16946868	41.0453	117067787	A	G	-0.0446	0.03528	0.175	0.05727	0.001097	0.2196
10	rs164243	125.778	80334556	A	G	-0.04226	0.03581	0.1805	0.0581	0.001098	0.22276
2	rs1453322	67.2205	234565438	A	G	0.03274	0.02255	-0.1066	0.03624	0.001098	-0.13934
12	rs1689411	93.4162	89751085	A	G	-0.05653	0.0244	0.09293	0.03876	0.001101	0.14946
14	rs1351980	111.094	83792268	A	G	0.00298	0.05494	-0.3472	0.09219	0.001104	-0.35018
2	rs7557611	32.5258	161440199	A	C	-0.05799	0.02159	0.07415	0.03427	0.001105	0.13214
14	rs225994	80.0115	30494365	G	A	-0.05163	0.02333	0.09094	0.03696	0.001106	0.14257
20	rs6080859	98.8396	17818141	G	A	0.007762	0.02133	-0.1218	0.03352	0.00111	-0.129562
5	rs1875216	116.776	30756641	A	G	-0.0008902	0.05078	0.3062	0.0793	0.00111	0.3070902
19	rs16979965	51.74	14950679	G	A	-0.02857	0.025	0.1253	0.04001	0.001111	0.15387
8	rs12543990	170.567	17522377	G	A	0.1405	0.05287	-0.1681	0.0785	0.001111	-0.3086
17	rs2881564	59.0733	31786051	G	A	-0.05031	0.02055	0.07611	0.03287	0.001112	0.12642
8	rs1491467	112.819	126962912	A	C	-0.07166	0.03972	0.1662	0.06119	0.001113	0.23786
3	rs9290737	42.2019	181979272	G	A	0.01528	0.02145	-0.1176	0.03465	0.001114	-0.13288
2	rs895522	72.27	101559604	A	G	-0.02846	0.01992	0.09326	0.03158	0.001115	0.12172
8	rs12544499	115.861	17522269	G	A	0.1404	0.05288	-0.1681	0.0785	0.001118	-0.3085
14	rs3088089	46.7736	51722682	A	G	-0.03973	0.03966	0.2108	0.06585	0.00112	0.25053
4	rs2976499	42.4705	139336708	G	A	-0.03006	0.02013	0.09235	0.03172	0.001121	0.12241
2	rs10803852	80.61	171665709	A	G	-0.0141	0.03622	0.2241	0.06351	0.001122	0.2382
20	rs228838	178.17	50068701	A	G	0.004928	0.03146	-0.1843	0.04884	0.001123	-0.189228
14	rs1534813	150.561	22461595	C	A	0.05407	0.03683	-0.1775	0.06081	0.001124	-0.23157
9	rs12341303	153.081	96003435	A	G	0.03597	0.01976	-0.08658	0.03201	0.001124	-0.12255
5	rs16872344	130.465	3735278	A	G	-0.03816	0.02016	0.08594	0.03233	0.001125	0.1241
9	rs4837510	14.5826	120591239	A	G	0.05106	0.02013	-0.07204	0.03201	0.001132	-0.1231
10	rs7906427	121.085	60683190	G	A	-0.03182	0.02007	0.09355	0.03287	0.001133	0.12537
10	rs11013137	2.00165	18531619	G	A	-0.04613	0.01994	0.07684	0.03209	0.001134	0.12297
6	rs2077573	56.5042	30428351	G	A	0.07348	0.02486	-0.08674	0.04249	0.001134	-0.16022
11	rs4319495	13.8988	7458223	C	A	-0.06935	0.0199	0.05435	0.03238	0.001136	0.1237
4	rs2903736	129.046	81703379	C	A	-0.04761	0.0372	0.1779	0.05847	0.001139	0.22551
4	rs4496623	220.935	185835029	A	G	0.04849	0.02431	-0.1041	0.04011	0.001139	-0.15259
22	rs5759844	123.713	23817891	A	G	-0.04645	0.02228	0.0915	0.03609	0.001144	0.13795
20	rs6073768	132.292	44130146	G	A	0.06509	0.02692	-0.09876	0.04259	0.001146	-0.16385
1	rs10918123	34.9282	165095279	A	G	-0.04803	0.03078	0.153	0.05362	0.001147	0.20103
4	rs1392615	74.3624	45224500	A	G	0.03611	0.02095	-0.09394	0.03407	0.001148	-0.13005
6	rs10456703	33.0643	13739490	G	A	-0.05987	0.02341	0.08847	0.03916	0.001149	0.14834
6	rs2784940	37.7856	142267503	A	G	0.02829	0.01967	-0.09219	0.03141	0.001151	-0.12048
3	rs755202	93.3672	194990363	G	A	0.08406	0.06947	-0.3483	0.1135	0.001154	-0.43236
3	rs9856251	123.547	1511108	G	A	0.06644	0.04623	-0.2142	0.07296	0.001159	-0.28064
16	rs9923900	73.5371	83967469	A	G	0.00603	0.02167	-0.1281	0.03516	0.001163	-0.13413
10	rs11198669	150.431	120668089	A	G	-0.01292	0.03136	0.1924	0.05488	0.001164	0.20532
1	rs7514391	99.1476	79123094	G	A	-0.06704	0.01986	0.05563	0.03214	0.001165	0.12267
16	rs889791	59.8875	79687003	A	C	-0.04103	0.02246	0.09324	0.03472	0.001167	0.13427
8	rs13273355	119.373	13424583	G	A	0.05222	0.02596	-0.1087	0.04221	0.001167	-0.16092
21	rs7283354	151.263	34877070	A	G	-0.02215	0.02129	0.1054	0.03303	0.00117	0.12755
4	rs598210	72.087	57126378	A	G	0.06324	0.02203	-0.07408	0.03615	0.001179	-0.13732
5	rs6897017	212.68	30695813	G	A	-0.01414	0.04829	0.2811	0.07713	0.00118	0.29524
20	rs4813944	81.7985	10769877	G	A	0.03592	0.01975	-0.08561	0.03185	0.001182	-0.12153
13	rs9528119	148.778	60954630	G	A	0.04984	0.01961	-0.07014	0.03139	0.001186	-0.11998
19	rs11667211	55.8906	1839483	A	G	0.0976	0.02738	-0.06958	0.04369	0.001186	-0.16718
8	rs17770304	8.50092	135624103	A	G	-0.04818	0.02377	0.09738	0.03808	0.001186	0.14556
10	rs11187825	40.6968	95987313	G	A	0.04027	0.02015	-0.08247	0.03206	0.001189	-0.12274
8	rs7011709	51.2947	55824925	C	A	-0.03149	0.02188	0.1017	0.03481	0.001192	0.13319
12	rs2031041	72.4013	128427252	A	G	0.08988	0.05168	-0.2193	0.0802	0.001194	-0.30918
18	rs17746949	224.969	31324766	A	G	-0.05335	0.05877	0.3081	0.09482	0.001194	0.36145
9	rs4979220	144.469	115963802	A	G	-0.01845	0.02161	0.1108	0.03352	0.001195	0.12925
6	rs945128	45.068	43710756	G	A	-0.05141	0.02512	0.1055	0.0414	0.001196	0.15691
3	rs329814	98.03	78957109	C	A	0.0245	0.02082	-0.1006	0.03251	0.001197	-0.1251
4	rs10033492	37.5274	29287401	C	A	0.03101	0.01962	-0.08922	0.0315	0.001199	-0.12023
9	rs10745384	85.252	137662523	G	A	-0.02566	0.01984	0.09607	0.03192	0.001201	0.12173
1	rs10489534	65.7892	40325764	A	C	0.1238	0.07954	-0.3338	0.1168	0.001202	-0.4576
8	rs10086465	54.21	127651504	A	G	0.113	0.06913	-0.31	0.1108	0.001202	-0.423
8	rs17684050	86.6592	119855817	G	A	-0.1254	0.05966	0.2488	0.09895	0.001202	0.3742
2	rs584526	67.7721	161603829	A	G	0.03779	0.0201	-0.08337	0.03156	0.001203	-0.12116
1	rs2188112	76.2765	158816589	A	G	-0.03744	0.02318	0.1036	0.03688	0.001204	0.14104
8	rs2247296	29.6001	30946605	C	A	0.1889	0.07095	-0.2467	0.1143	0.001204	-0.4356
13	rs766106	137.62	108989698	A	G	0.0139	0.01999	0.1346	0.03147	0.001205	0.1207
8	rs13281818	76.8585	6622685	G	A	-0.03323	0.02776	0.1383	0.04511	0.001206	0.17153
1	rs7547680	139.493	56687749	C	A	0.06073	0.02116	-0.0688	0.03396	0.001207	-0.12953
5	rs691889	51.1555	176212812	G	A	-0.1156	0.04406	0.1471	0.06815	0.001207	0.2627
14	rs10151712	104.917	78052809	G	A	0.04641	0.01969	-0.07493	0.03191	0.00121	-0.12134
5	rs2438479	121.756	5602530	G	A	-0.04075	0.0212	0.08736	0.03343	0.001211	0.12811
3	rs4293672	224.703	25913415	A	G	0.05443	0.02446	-0.09589	0.03949	0.001212	-0.15032
10	rs7072007	190.831	12062959	A	G	-0.01082	0.03135	0.1817	0.05057	0.001214	0.19252
7	rs2072237	150.3	29111093	A	G	-0.04076	0.02565	0.1147	0.04064	0.001216	0.15546
7	rs6959593	89.3376	52525336	C	A	-0.06187	0.03088	0.1285	0.05008	0.001216	0.19037
19	rs4801699	108.39	56785231	G	A	-0.08878	0.03618	0.1322	0.05793	0.001218	0.22098
8	rs10090349	222.308	13426508	G	A	0.0446	0.0251	-0.1086	0.04015	0.001218	-0.1532
6	rs1362115	75.5114	30414848	A	G	0.07311	0.02487	-0.0861	0.04248	0.001219	-0.15921
22	rs743959	152.198	27389201	G	A	-0.09837	0.05104	0.2036	0.07822	0.001225	0.30197
5	rs10942497	107.124	86482632	G	A	-0.06126	0.03871	0.1771	0.0628	0.001232	0.23836
18	rs2621167	142.031	458662	G	A	-0.04088	0.02109	0.08503	0.03277	0.001233	0.12591
8	rs2514864	21.7289	108393800	A	G	-0.08089	0.02131	0.04897	0.03409	0.001235	0.12986
15	rs12907134	109.992	81525319	G	A	0.02515	0.02019	-0.09627	0.03171	0.001237	-0.12142
5	rs735331	127.561	155413224	G	A	0.08192	0.04335	-0.1808	0.06883	0.001238	-0.26272
1	rs2494034	86.3053	158842453	A	G	-0.04562	0.02284	0.09004	0.03526	0.001242	0.13566
20	rs6100478	76.0877	58100862	A	C	-0.05587	0.01982	0.06583	0.03206	0.001242	0.1217
12	rs2701818	47.8523	128413153	G	A	0.004093	0.06541	0.4074	0.1064	0.001244	0.403307
7	rs7803262	229	48039485	A	C	0.06041	0.03537	-0.1482	0.05408	0.001247	-0.20861
16	rs17137037	78.1496	4492718	C	A	0.0439	0.0359	-0.1709	0.05606	0.001249	-0.2148
4	rs3884638	73.8807	29998461	C	A	-0.05421	0.02071	0.07442	0.03407	0.001253	0.12863
8	rs241167	233.454	28657761	G	A	-0.008039	0.02084	0.1206	0.03399	0.001254	0.128639
8	rs3990015	151.033	6628841	A	G	-0.02097	0.03159	0.1746	0.05173	0.001254	0.19557
7	rs7778623	40.619	95078296	G	A	-0.02758	0.02091	0.0978	0.03276	0.001257	0.12538
16	rs1865810	43.6686	5901163	A	G	0.1008	0.02529	-0.05456	0.04098	0.001258	-0.15536
21	rs233609	192.131	28394696	C	A	0.08754	0.04007	-0.1589	0.06504	0.001258	-0.24644
4	rs6828013	102.68	108135681	A	G	0.06607	0.03822	-0.167	0.06136	0.00126	-0.23307
19	rs10422803	51.1592	35597215	A	C	-0.02871	0.02008	0.093	0.03196	0.001262	0.12171
5	rs171711	51.3975	86471345	A	C	-0.03771	0.03352	0.1652	0.05325	0.001262	0.20291
6	rs4288220	36.3917	139035790	G	A	0.09091	0.04382	-0.1815	0.07225	0.001266	-0.27241
1	rs11166438	125.27	100800905	A	C	0.01314	0.0199	-0.1082	0.03197	0.001267	-0.12134
2	rs17385675	34.1724	202807196	A	G	0.02614	0.0371	-0.1997	0.05946	0.001269	-0.22584
5	rs17341747	114.157	103570158	A	C	-0.03932	0.03461	0.1637	0.05268	0.001275	0.20302
15	rs1479809	9.15224	94530443	G	A	-0.07305	0.01944	0.04562	0.03129	0.001276	0.11867
19	rs12611036	158.673	8784481	A	G	0.01604	0.02205	-0.1155	0.03439	0.001277	-0.13154
5	rs2910721	87.5572	37755337	G	A	-0.09547	0.03609	0.1197	0.05623	0.001278	0.21517
2	rs6544527	59.9703	42494273	A	G	-0.03761	0.0197	0.08245	0.03165	0.001282	0.12006
1	rs728859	121.097	41347228	A	C	-0.04588	0.02234	0.08971	0.0357	0.001283	0.13559
22	rs7510754	89.1537	46446758	G	A	0.05572	0.02063	-0.07171	0.03377	0.001283	-0.12743
18	rs11081425	5.71154	8896310	A	G	0.001004	0.02157	-0.1293	0.03426	0.001291	-0.130304
6	rs421500	146.176	133228839	G	A	-0.03659	0.02047	0.08778	0.03278	0.001292	0.12437
11	rs7102501	129.192	55091268	A	G	-0.02979	0.02247	0.1074	0.03627	0.001298	0.13719
5	rs1007586	150.452	26942758	G	A	-0.1243	0.0347	0.08859	0.05635	0.001298	0.21289
5	rs6896806	92.4709	89092732	G	A	-0.09155	0.02019	0.0306	0.03216	0.001298	0.12215
5	rs7710392	127.288	171115769	A	G	0.04748	0.02764	-0.1167	0.04291	0.001298	-0.16418
1	rs522277	56.6771	120288333	G	A	0.03874	0.02105	-0.08915	0.03377	0.001309	-0.12789
9	rs10811697	23.3475	22364080	A	G	-0.02656	0.01977	0.09314	0.03157	0.001309	0.1197
2	rs2302346	121.097	42488045	G	A	0.03331	0.01959	-0.08586	0.03148	0.00131	-0.11917
1	rs3738154	12.5774	205063949	A	G	-0.0384	0.01989	0.08171	0.03165	0.001312	0.12011
19	rs3765148	111.608	49447713	A	G	-0.005093	0.03994	0.2426	0.06595	0.001314	0.247693
17	rs7221329	134.868	9098228	A	G	-0.03153	0.04154	0.2263	0.06867	0.001316	0.25783
3	rs9637536	37.9635	38800873	A	G	-0.03052	0.02744	0.1375	0.04453	0.001316	0.16802
2	rs1154652	103.23	110934723	G	A	0.07992	0.0266	-0.08246	0.04299	0.001318	-0.16238
8	rs6990880	85.3761	4880786	A	G	-0.05375	0.01958	0.06514	0.03142	0.00132	0.11889
2	rs7582614	153.341	155308672	C	A	-0.01911	0.01972	0.09976	0.03133	0.001322	0.11887
4	rs4956005	97.5272	108132331	A	G	0.06484	0.03824	-0.1681	0.06167	0.001324	-0.23294
16	rs4416010	3.05493	51289687	G	A	0.03947	0.01987	-0.08138	0.03197	0.001325	-0.12085
17	rs10521104	10.7694	504459	G	A	-0.02531	0.02726	0.141	0.04407	0.001326	0.16631
12	rs10861896	66.3742	108739630	G	A	-0.05979	0.02127	0.06934	0.03414	0.001327	0.12913
4	rs1460160	30.9771	137634874	A	G	-0.03064	0.0244	0.1193	0.03985	0.001328	0.14994
12	rs11612558	131.282	15820297	G	A	-0.07192	0.02016	0.04889	0.03178	0.001329	0.12081
17	rs7215204	65.4985	9312566	A	G	0.03202	0.01983	-0.08749	0.03152	0.001329	-0.11951
5	rs819355	120.24	89084473	G	A	-0.0919	0.02018	0.0301	0.03221	0.001329	0.122
18	rs9303973	2.38481	5170379	G	A	0.03862	0.03899	-0.1911	0.06003	0.00133	-0.22972
22	rs9617490	166.95	49059556	G	A	-0.03039	0.02119	0.09968	0.03455	0.00133	0.13007
3	rs1501875	11.8418	117238112	G	A	-0.05257	0.01987	0.06893	0.03223	0.001331	0.1215
9	rs9775695	109.103	124900788	G	A	0.02422	0.02	-0.0971	0.03208	0.001331	-0.12132
3	rs2736794	162.893	59964805	G	A	-0.02523	0.02234	0.1092	0.03545	0.001333	0.13443
7	rs799588	50.8543	96902638	A	G	0.0129	0.01991	-0.1082	0.03204	0.001334	-0.1211
2	rs10165970	95.5188	101456989	A	G	0.06534	0.02806	-0.1026	0.04419	0.001335	-0.16794
9	rs2026662	21.6563	16060746	G	A	0.02465	0.02077	-0.1008	0.03315	0.001338	-0.12545
12	rs11178695	167.32	71627117	G	A	-0.05911	0.02006	0.06266	0.03223	0.001339	0.12177
9	rs1543729	131.65	29831400	A	G	0.03835	0.01999	-0.0829	0.03209	0.00134	-0.12125
5	rs9313114	12.4379	5605051	A	G	-0.04107	0.0212	0.08597	0.03346	0.001342	0.12704
12	rs4523784	75.1209	26329788	G	A	-0.01969	0.029	0.1545	0.04593	0.001344	0.17419
4	rs7678939	153.25	80645990	C	A	0.004149	0.02647	-0.1586	0.04329	0.001344	-0.162749
1	rs12565445	226.137	9510150	G	A	0.06467	0.02087	-0.06425	0.03437	0.001345	-0.12892
5	rs10476041	56.27	172003493	A	C	0.02375	0.02706	-0.1373	0.04231	0.001346	-0.16105
10	rs9794109	11.9407	98007545	A	G	-0.05325	0.02132	0.07869	0.03522	0.001349	0.13194
8	rs12334631	119.098	8979776	A	C	-0.05586	0.02024	0.06631	0.03231	0.001353	0.12217
14	rs4905373	74.9219	42656202	A	G	0.04057	0.03474	-0.1665	0.05448	0.001354	-0.20707
19	rs3786867	201.392	55684200	A	G	0.1309	0.03033	-0.05039	0.04778	0.001356	-0.18129
3	rs9290759	38.9737	183295453	G	A	-0.04193	0.02001	0.07779	0.03159	0.001368	0.11972
2	rs12694937	107.03	158657433	G	A	-0.0008466	0.06353	-0.3845	0.1016	0.001369	-0.3836534
3	rs537205	170.965	189871715	A	G	0.04085	0.02754	-0.1258	0.04418	0.001369	-0.16665
2	rs7565295	52.1408	2605585	G	A	0.04702	0.02019	-0.07421	0.03205	0.00137	-0.12123
5	rs6870870	77.9068	55294328	A	C	-0.04783	0.01977	0.07161	0.03166	0.001375	0.11944
7	rs17393952	94.8905	88601192	A	C	-0.07025	0.02478	0.07957	0.03973	0.001375	0.14982
5	rs1318543	88.9592	5602308	A	G	-0.04075	0.0212	0.08597	0.03346	0.001378	0.12672
14	rs985956	157.054	79187749	G	A	0.05218	0.02079	-0.0736	0.03338	0.001382	-0.12578
4	rs6813768	161.272	147941013	G	A	-0.086	0.04798	0.2199	0.08273	0.001382	0.3059
1	rs11804407	57.5657	114828360	A	G	0.07873	0.03019	-0.1035	0.04832	0.001384	-0.18223
19	rs12461494	78.078	14949774	A	C	-0.02722	0.02503	0.1237	0.04002	0.001386	0.15092
6	rs211456	52.9437	33389381	A	C	-0.005278	0.02	0.1159	0.03218	0.001387	0.121178
18	rs1155333	38.877	24750734	G	A	0.02348	0.02234	-0.111	0.03565	0.00139	-0.13448
3	rs10511418	148.81	123532046	A	G	0.01275	0.05321	0.3249	0.0819	0.001393	0.31215
1	rs2852657	86.5708	158847720	A	G	-0.04486	0.02282	0.08936	0.03526	0.001395	0.13422
5	rs11167699	259.425	154050914	A	G	-0.005316	0.03054	-0.1923	0.04991	0.001397	-0.186984
2	rs17279771	156.582	171438522	A	G	-0.03501	0.01981	0.08405	0.03157	0.0014	0.11906
12	rs1403506	95.8688	99350700	G	A	-0.04557	0.02386	0.09702	0.03773	0.001402	0.14259
13	rs532238	101.68	39953327	A	C	-0.04085	0.02164	0.09029	0.03489	0.001402	0.13114
1	rs10917268	81.7	22937818	A	G	0.04346	0.03598	-0.1761	0.05857	0.001403	-0.21956
2	rs2139099	25.3849	88557666	G	A	0.06217	0.02987	-0.118	0.04785	0.001403	-0.18017
5	rs9327661	115.529	133002123	G	A	0.03219	0.02581	-0.1256	0.04212	0.001403	-0.15779
9	rs11144870	130.194	79004213	A	G	0.03029	0.02186	-0.1032	0.03562	0.001403	-0.13349
5	rs17148926	77.5536	121510586	C	A	0.05512	0.02537	-0.09963	0.0413	0.001409	-0.15475
19	rs8100775	157.19	14924875	G	A	0.03837	0.0214	-0.09358	0.03536	0.001411	-0.13195
9	rs12376503	13.0144	24121196	G	A	-0.05492	0.02567	0.1013	0.04167	0.001411	0.15622
14	rs10132022	122.854	68500751	G	A	0.05968	0.02621	-0.09849	0.04205	0.001412	-0.15817
1	rs17104182	39.2649	48594201	G	A	-0.06407	0.06103	0.2998	0.09629	0.001412	0.36387
3	rs6551001	26.9782	25913954	C	A	0.05352	0.02451	-0.09515	0.0396	0.001412	-0.14867
9	rs7027743	67.8578	115915624	A	G	-0.03106	0.01987	0.08819	0.03164	0.001412	0.11925
5	rs10076429	275.834	84003689	A	C	-0.05551	0.02245	0.08122	0.03649	0.001415	0.13673
6	rs28512317	151.503	30413182	C	A	0.07435	0.02487	-0.08277	0.0425	0.001418	-0.15712
3	rs2596834	173.407	10820067	A	G	-0.05338	0.02002	0.06616	0.03167	0.00142	0.11954
18	rs7227840	31.1478	75164995	A	G	0.01458	0.02086	-0.1115	0.03358	0.001421	-0.12608
5	rs16874969	219.27	59602340	A	G	-0.0338	0.02532	0.1212	0.04145	0.001421	0.155
18	rs4800787	10.9781	24686365	A	G	0.02338	0.02119	-0.1026	0.03335	0.001426	-0.12598
1	rs4657270	58.2206	163378647	A	G	-0.09092	0.03802	0.143	0.06273	0.001426	0.23392
10	rs2386647	21.2791	5691135	A	G	-0.007519	0.03598	0.2119	0.05866	0.001427	0.219419
4	rs6841260	68.9	121894207	G	A	0.05694	0.02788	-0.1141	0.04582	0.001432	-0.17104
10	rs17130335	12.1925	115140256	G	A	0.08036	0.04955	-0.2269	0.08268	0.001433	-0.30726
1	rs6663064	110.058	151915541	A	G	-0.04955	0.02171	0.07829	0.03372	0.001433	0.12784
8	rs2542436	41.8201	140602616	G	A	-0.01525	0.02533	0.136	0.04013	0.001433	0.15125
10	rs692788	73.5737	89799613	G	A	0.05354	0.02602	-0.1047	0.0423	0.001436	-0.15824
6	rs7758727	160.244	71959728	A	C	-0.01628	0.03708	0.2082	0.05988	0.001436	0.22448
9	rs12346252	28.3376	1239644	A	G	0.02891	0.03172	-0.1641	0.05157	0.001436	-0.19301
14	rs229835	154.254	83866544	A	G	0.02173	0.01968	-0.09709	0.03166	0.001437	-0.11882
12	rs770087	51.7101	89744773	C	A	-0.05915	0.02472	0.09028	0.03985	0.001439	0.14943
6	rs373695	100.796	6184352	G	A	0.01072	0.03286	-0.195	0.05559	0.001446	-0.20572
8	rs11136912	97.7237	559071	G	A	0.03447	0.02154	-0.09463	0.03435	0.00145	-0.1291
10	rs1547643	139.9	96011865	A	C	0.04096	0.02003	-0.07901	0.03192	0.001454	-0.11997
1	rs667246	178.078	120293367	A	G	0.0379	0.02107	-0.08892	0.03381	0.001455	-0.12682
10	rs7085697	129.938	52939040	G	A	0.009311	0.01987	-0.1093	0.03154	0.00146	-0.118611
3	rs11718362	112.459	183293954	A	G	-0.04186	0.02004	0.07733	0.03164	0.00146	0.11919
3	rs2064016	64.6032	60116055	G	A	0.02394	0.02647	-0.1333	0.04172	0.00146	-0.15724
2	rs6719824	53.0377	33604048	C	A	-0.1083	0.03506	0.09995	0.05528	0.001464	0.20825
4	rs2912467	111.922	139345618	A	G	-0.02433	0.02078	0.1007	0.03334	0.001464	0.12503
4	rs7691380	39.1448	75624475	A	G	-0.0649	0.02232	0.07147	0.03659	0.001465	0.13637
6	rs4959047	1.73834	30416553	A	G	0.07264	0.02486	-0.08387	0.04247	0.00147	-0.15651
18	rs11660264	204.281	75470654	A	C	-0.05256	0.0414	0.1899	0.06403	0.001471	0.24246
1	rs12120762	19.1248	198699793	G	A	-0.04538	0.02067	0.07744	0.03265	0.00148	0.12282
15	rs9920796	160.893	60607380	G	A	0.0266	0.02262	-0.1119	0.03725	0.001487	-0.1385
1	rs6541019	195.411	12436431	A	G	0.03881	0.02062	-0.0859	0.0334	0.001489	-0.12471
6	rs4959050	80.78	30416831	A	G	0.07156	0.02495	-0.08569	0.04275	0.001489	-0.15725
17	rs8074995	77.8676	64792131	A	G	-0.03566	0.0277	0.1261	0.04274	0.00149	0.16176
8	rs873224	34.9597	142530964	G	A	0.06299	0.03446	-0.1508	0.05782	0.001492	-0.21379
2	rs13394704	119.914	234537447	A	C	0.03333	0.02259	-0.1024	0.0363	0.001497	-0.13573
3	rs1447963	50.3903	103777910	C	A	-0.0288	0.02248	0.1072	0.03647	0.001499	0.136
2	rs1427696	23.8908	235735930	A	G	0.1002	0.03108	-0.09045	0.05138	0.0015	-0.19065
12	rs704073	247.151	89741711	A	G	-0.05855	0.0247	0.09044	0.03991	0.001501	0.14899
2	rs7604433	65.6647	177260099	A	G	-0.02016	0.02002	0.1006	0.03234	0.001501	0.12076
5	rs10491465	134.939	156080965	A	C	-0.09003	0.08979	0.4462	0.1431	0.001505	0.53623
12	rs7972272	34.7373	129014884	A	G	-0.06651	0.02102	0.06033	0.034	0.001507	0.12684
10	rs10826893	162.107	19344979	G	A	-0.02802	0.02134	0.1049	0.03606	0.001508	0.13292
1	rs2064901	5.52554	120017900	A	G	0.0196	0.02079	-0.1072	0.03413	0.001508	-0.1268
5	rs10074991	11.0416	40790551	A	G	-0.06321	0.02229	0.0714	0.03609	0.001508	0.13461
12	rs4517620	84.0735	26318180	A	G	-0.02045	0.02901	0.152	0.04596	0.001509	0.17245
5	rs327864	83.4239	125226570	G	A	0.001521	0.03888	-0.2269	0.0606	0.001509	-0.228421
9	rs4263842	223.507	115917783	G	A	-0.02199	0.02073	0.1012	0.03282	0.00151	0.12319
5	rs1379273	75.3589	174777691	A	G	-0.02107	0.0272	0.1447	0.04459	0.001511	0.16577
10	rs9414844	62.1458	52929610	G	A	0.009196	0.01987	-0.1091	0.03155	0.001513	-0.118296
2	rs1479588	28.7731	168117790	A	G	0.0233	0.023	-0.1135	0.03649	0.001514	-0.1368
15	rs1703791	57.2592	99616337	A	C	-0.06233	0.02529	0.08989	0.04079	0.001515	0.15222
6	rs6917933	99.598	74104299	A	C	-0.04571	0.02752	0.1176	0.04351	0.001515	0.16331
10	rs10905889	102.15	11082012	G	A	-0.01842	0.03161	0.1648	0.04836	0.001516	0.18322
8	rs7834039	69.5916	18193096	C	A	-0.04004	0.01986	0.07762	0.03134	0.001516	0.11766
12	rs16943519	69.5786	114401696	G	A	-0.004943	0.03418	0.2074	0.0576	0.001519	0.212343
2	rs13010568	28.3	221362838	A	G	0.03235	0.02028	-0.08841	0.03223	0.001519	-0.12076
5	rs2914129	44.0855	29928351	A	C	0.01344	0.01992	-0.1048	0.03151	0.001519	-0.11824
9	rs4877525	99.7878	82583014	G	A	0.04435	0.05605	-0.2798	0.0855	0.001519	-0.32415
2	rs250916	91.3603	235017927	A	C	0.05888	0.02841	-0.1056	0.04341	0.001523	-0.16448
7	rs12703326	75.79	153907603	A	G	-0.06066	0.02729	0.1045	0.04439	0.001523	0.16516
7	rs804755	36.22	52612575	A	G	0.03241	0.02304	-0.1035	0.03615	0.001524	-0.13591
1	rs12030948	100.116	67701765	A	C	0.002384	0.02046	-0.12	0.03276	0.001527	-0.122384
3	rs4859211	114.445	183292676	G	A	-0.04391	0.02006	0.07475	0.03161	0.001527	0.11866
6	rs866236	104.062	43726956	A	G	-0.03143	0.02306	0.1067	0.03699	0.001529	0.13813
12	rs769700	133.051	89743614	G	A	-0.05876	0.0247	0.08999	0.03992	0.00153	0.14875
11	rs628524	209.16	56310222	G	A	-0.04668	0.02218	0.08803	0.03627	0.001531	0.13471
7	rs984197	140.671	52548691	A	G	0.02287	0.02172	-0.1067	0.03464	0.001532	-0.12957
12	rs3782362	77.5997	72885554	C	A	0.06084	0.02595	-0.09205	0.04069	0.001533	-0.15289
12	rs7296535	71.5934	17933131	G	A	0.01919	0.02015	-0.1002	0.03186	0.001535	-0.11939
8	rs4732885	53.7654	28696395	G	A	-0.01603	0.02065	0.1097	0.0339	0.001535	0.12573
9	rs10810126	13.4427	14292207	A	G	0.04729	0.02091	-0.07841	0.03373	0.001537	-0.1257
2	rs6541829	102.284	123222183	G	A	-0.02956	0.02171	0.1028	0.03573	0.001538	0.13236
6	rs9493450	129.687	133135807	A	G	-0.03157	0.01996	0.08759	0.03189	0.001538	0.11916
9	rs6475457	191.406	20537343	A	G	0.04219	0.01992	-0.0767	0.03182	0.001539	-0.11889
1	rs1894647	109.449	7205950	A	G	-0.03817	0.0357	0.1768	0.05774	0.001541	0.21497
5	rs277868	62.9258	100094210	A	G	-0.04237	0.02133	0.08394	0.03371	0.001542	0.12631
6	rs4714695	68.1589	43711459	A	G	-0.05179	0.02515	0.1018	0.04147	0.001544	0.15359
3	rs16857652	50.1221	145664959	A	G	-0.06728	0.02355	0.07425	0.038	0.001546	0.14153
7	rs296307	162.749	52432938	A	G	0.03081	0.0212	-0.09446	0.03342	0.001547	-0.12527
1	rs3765945	89.6815	120051446	G	A	0.02033	0.02078	-0.1065	0.03424	0.00155	-0.12683
4	rs6842373	150.71	146998070	A	G	-0.06569	0.03166	0.1162	0.04795	0.00155	0.18189
15	rs7180380	23.2814	70474226	A	G	-0.01619	0.01985	0.1034	0.03217	0.001556	0.11959
5	rs10063826	133.397	172004039	A	G	0.02193	0.02699	-0.1368	0.04228	0.001557	-0.15873
4	rs6848228	60.2362	75619533	G	A	-0.05416	0.02405	0.09262	0.03967	0.001559	0.14678
10	rs3740236	78.7974	31134214	G	A	-0.03324	0.0312	0.159	0.05216	0.001563	0.19224
2	rs10495557	76.2042	7631459	A	G	-0.04043	0.02091	0.08465	0.03359	0.001569	0.12508
9	rs12004434	180.23	129058924	A	G	0.04311	0.02388	-0.09923	0.03818	0.001575	-0.14234
16	rs4077730	71.8636	7877054	G	A	-0.06341	0.04233	0.199	0.07142	0.001576	0.26241
9	rs11144905	187.445	79065299	C	A	0.01558	0.02067	-0.1081	0.03324	0.001576	-0.12368
10	rs12218663	96.3222	121219756	A	G	0.1915	0.05847	-0.1454	0.08915	0.001579	-0.3369
5	rs10060454	92.4994	30672798	A	G	-0.02357	0.04906	0.273	0.08005	0.001582	0.29657
20	rs16979829	47.8052	54947050	C	A	0.1961	0.0554	-0.1389	0.09046	0.001588	-0.335
10	rs164226	154.086	80325854	A	C	-0.0441	0.0362	0.1756	0.05943	0.001589	0.2197
9	rs10870194	33.6819	139327034	G	A	0.0004459	0.01974	0.1175	0.03137	0.001589	0.1170541
11	rs637912	78.1388	56294818	A	G	-0.04632	0.02216	0.08777	0.03622	0.00159	0.13409
6	rs13207432	80.0493	52454094	C	A	0.03728	0.021	-0.08763	0.03353	0.001593	-0.12491
1	rs10494384	83.6908	163349039	G	A	-0.09133	0.03612	0.1257	0.05851	0.001594	0.21703
7	rs357399	82.4184	138044576	G	A	0.05252	0.02143	-0.07609	0.03465	0.001595	-0.12861
1	rs1318463	77.2446	242738254	A	G	-0.0431	0.02048	0.07658	0.03191	0.001596	0.11968
8	rs1559746	145.175	6613787	G	A	-0.01401	0.02017	0.1043	0.03161	0.001597	0.11831
13	rs943385	107.276	23556441	A	G	0.03663	0.02169	-0.09428	0.03537	0.001604	-0.13091
1	rs867321	79.6697	16087164	A	G	-0.07302	0.03019	0.1061	0.04807	0.001604	0.17912
1	rs856118	109.463	158899720	C	A	-0.04473	0.02285	0.08837	0.03547	0.001608	0.1331
1	rs4951175	90.03	205089977	G	A	-0.1177	0.08596	0.3952	0.1381	0.001609	0.5129
7	rs6959540	62.7351	77845098	A	C	0.03042	0.02119	-0.0945	0.03347	0.001613	-0.12492
5	rs700706	33.1701	132864295	A	G	0.0128	0.02063	-0.1097	0.03291	0.001614	-0.1225
9	rs10992689	26.7473	96017751	G	A	0.06703	0.02178	-0.06195	0.03462	0.001614	-0.12898
10	rs4747204	63.9195	73598889	A	G	-0.04424	0.02412	0.09918	0.03857	0.001619	0.14342
9	rs1407508	76.2315	101644538	G	A	-0.07577	0.03977	0.1563	0.06195	0.00162	0.23207
7	rs17157870	79.3073	110287125	A	C	-0.04341	0.05228	0.2548	0.07884	0.001621	0.29821
7	rs11764857	84.8491	152782900	A	G	-0.0267	0.02159	0.1026	0.03487	0.001624	0.1293
1	rs12077203	158.444	165117250	A	G	-0.05004	0.03527	0.1662	0.05886	0.001625	0.21624
5	rs11956267	87.5953	27154889	A	G	-0.03042	0.02318	0.1096	0.03791	0.001625	0.14002
20	rs6068212	92.7894	51133920	C	A	0.02021	0.01987	-0.1001	0.0326	0.001629	-0.12031
2	rs6544523	106.246	42465484	A	C	0.05054	0.02061	-0.07112	0.03266	0.001632	-0.12166
3	rs16865412	184.977	190077120	A	G	-0.04442	0.02867	0.125	0.04552	0.001633	0.16942
3	rs9819930	111.38	59933791	A	G	-0.04508	0.02982	0.1306	0.04712	0.001633	0.17568
8	rs16880528	117.574	111244015	A	G	-0.0671	0.03428	0.1374	0.05515	0.001633	0.2045
5	rs10078687	29.2123	26944286	A	G	-0.1243	0.03453	0.0839	0.05634	0.001634	0.2082
20	rs6048300	11.2169	22708359	A	G	0.02578	0.02176	-0.1019	0.03419	0.001635	-0.12768
9	rs3003599	125.737	130979181	A	G	-0.027	0.02488	0.12	0.03949	0.001635	0.147
3	rs4481144	152.363	1175539	G	A	0.03319	0.02018	-0.08711	0.03243	0.001637	-0.1203
16	rs6498482	50.81	13987719	G	A	0.008281	0.0202	-0.1117	0.0323	0.001644	-0.119981
6	rs9381400	71.5405	45800800	A	G	0.09638	0.03033	-0.08351	0.04845	0.001648	-0.17989
5	rs7730111	165.025	44132277	G	A	-0.001208	0.02971	0.1799	0.04928	0.001649	0.181108
12	rs10841530	53.8901	20599112	G	A	0.03598	0.02039	-0.08668	0.03322	0.001651	-0.12266
11	rs7946766	30.9099	48004369	A	G	-0.03803	0.02801	0.1315	0.04603	0.001652	0.16953
14	rs170697	52.6675	83856849	G	A	0.02322	0.01926	-0.09346	0.0317	0.001657	-0.11668
1	rs4950989	84.0636	205282979	A	G	0.05858	0.02149	-0.07057	0.03498	0.001657	-0.12915
3	rs11708971	62.4717	40627829	A	G	-0.01103	0.02085	0.1151	0.03427	0.001657	0.12613
8	rs1489359	184.664	111830570	G	A	0.02092	0.04383	0.2909	0.07378	0.001657	0.26998
18	rs16978151	78.4167	42325886	A	G	-0.006507	0.02266	-0.1407	0.03617	0.00166	-0.134193
5	rs4958344	61.9648	152927244	G	A	-0.01604	0.02144	0.1149	0.03571	0.001665	0.13094
3	rs9289186	3.30444	121740304	A	G	0.07494	0.03199	-0.1168	0.05194	0.00167	-0.19174
15	rs1836698	110.121	100459434	A	C	-0.03166	0.01989	0.08573	0.03161	0.001671	0.11739
12	rs10877327	107.094	60074185	A	C	0.03033	0.0291	-0.1435	0.04706	0.001673	-0.17383
12	rs11059421	100.179	128436536	G	A	0.09113	0.05156	-0.2067	0.07953	0.001674	-0.29783
6	rs200232	105.304	50414325	A	G	0.04876	0.02307	-0.08769	0.0368	0.00168	-0.13645
10	rs11595661	116.464	52255254	G	A	-0.07143	0.02987	0.1043	0.04728	0.001683	0.17573
1	rs860637	99.3265	158884519	A	G	-0.04206	0.02283	0.09021	0.03539	0.001683	0.13227
12	rs10879355	2.85876	72413009	A	G	-0.001326	0.02027	0.1178	0.03205	0.001685	0.119126
8	rs4373503	16.3042	125044118	A	G	-0.0315	0.02085	0.09163	0.0332	0.001686	0.12313
5	rs3933957	56.1384	41623306	C	A	-0.07108	0.03602	0.1435	0.05809	0.001692	0.21458
12	rs536361	51.0086	17728453	G	A	-0.0497	0.02295	0.08402	0.03588	0.001693	0.13372
1	rs372814	66.1839	120193579	A	G	0.01915	0.0217	-0.1108	0.03525	0.001696	-0.12995
18	rs625719	63.101	8858086	A	G	-0.02312	0.02207	0.1068	0.03504	0.001697	0.12992
4	rs2672487	162.287	108537766	A	G	0.02847	0.02006	-0.08966	0.03185	0.001697	-0.11813
19	rs921935	61.6515	35600510	C	A	-0.02541	0.01996	0.09277	0.03193	0.001698	0.11818
15	rs7172044	209.523	88911898	G	A	0.08909	0.02666	-0.07017	0.04319	0.001703	-0.15926
11	rs1459885	49.926	21625552	C	A	-0.0309	0.01967	0.08509	0.0313	0.001705	0.11599
17	rs2279914	138.424	79168151	A	G	0.0471	0.04338	-0.2088	0.06905	0.001705	-0.2559
4	rs16879070	86.4983	27262518	A	G	0.0493	0.01981	-0.0682	0.03179	0.001707	-0.1175
2	rs6740463	14.7687	77783335	G	A	0.0421	0.01985	-0.07447	0.03143	0.001712	-0.11657
14	rs11156787	11.1249	33841444	A	G	0.05071	0.01973	-0.06578	0.03148	0.001717	-0.11649
9	rs13283472	20.0885	125105790	C	A	-0.06284	0.031	0.1217	0.05006	0.001721	0.18454
7	rs3847104	108.493	130400698	G	A	0.04011	0.02925	-0.1366	0.04821	0.001722	-0.17671
21	rs2826709	116.971	22519580	G	A	-0.02708	0.02013	0.09163	0.03209	0.001723	0.11871
8	rs17078076	111.072	6628927	G	A	-0.02312	0.03151	0.1662	0.05154	0.001728	0.18932
3	rs9968130	32.5471	185953613	A	C	-0.1309	0.05297	0.1761	0.08246	0.00173	0.307
5	rs3733925	63.1927	150090344	G	A	0.06011	0.04884	-0.2259	0.07714	0.001732	-0.28601
16	rs8056954	17.836	56930229	A	C	-0.03604	0.02699	0.1263	0.04425	0.001733	0.16234
8	rs2450063	84.1275	120097576	G	A	-0.04273	0.0205	0.07904	0.03304	0.001736	0.12177
4	rs10028122	70.9616	53578009	A	G	0.008298	0.03322	-0.1834	0.05144	0.00174	-0.191698
3	rs7620637	163.671	1175950	A	G	0.03256	0.02014	-0.0869	0.0324	0.001741	-0.11946
3	rs17061972	63.5416	60047076	C	A	-0.0694	0.03982	0.1605	0.0617	0.001745	0.2299
2	rs6731283	257.788	168073830	A	C	0.02628	0.02299	-0.1086	0.03643	0.001749	-0.13488
1	rs11590302	62.8326	40305271	G	A	0.1244	0.08099	-0.3263	0.1191	0.001751	-0.4507
17	rs3744063	119.245	75210574	C	A	0.01472	0.02216	-0.1189	0.0365	0.001753	-0.13362
3	rs552666	85.3904	16408534	A	G	0.08389	0.02285	-0.05057	0.03639	0.001754	-0.13446
5	rs13355489	52.4029	156664822	G	A	-0.05311	0.02823	0.1158	0.046	0.001754	0.16891
11	rs11263596	134.909	69637967	A	C	-0.0896	0.04119	0.1427	0.0618	0.001759	0.2323
9	rs4744195	161.93	95985281	A	G	0.0411	0.01977	-0.07661	0.03202	0.00176	-0.11771
14	rs12880418	122.05	79169828	A	G	0.04506	0.02127	-0.08106	0.03426	0.001762	-0.12612
18	rs3910498	98.2649	28656735	G	A	-0.02626	0.02299	0.1094	0.03677	0.001764	0.13566
17	rs7208912	149.746	76944029	C	A	-0.04322	0.01973	0.07265	0.03136	0.001767	0.11587
2	rs7602084	60.7853	123900548	C	A	-0.07207	0.02445	0.06984	0.03823	0.001767	0.14191
8	rs750835	82.2442	5981454	A	G	0.02866	0.01996	-0.08853	0.03172	0.001767	-0.11719
3	rs4234249	160.963	35988262	C	A	0.05424	0.0328	-0.1414	0.05328	0.001769	-0.19564
4	rs13148223	67.7026	156762493	G	A	0.03859	0.01994	-0.07996	0.03225	0.001769	-0.11855
1	rs1864348	158.828	158741091	G	A	0.02946	0.02	-0.08893	0.03216	0.001771	-0.11839
6	rs1983634	126.635	146665616	G	A	-0.02457	0.02199	0.1038	0.03467	0.001774	0.12837
5	rs10068769	128.615	133006274	A	G	-0.02649	0.01974	0.08826	0.03096	0.001775	0.11475
11	rs1023921	99.1409	55494172	A	G	-0.03135	0.0218	0.09754	0.035	0.001776	0.12889
7	rs2428290	75.919	116684434	A	G	0.04133	0.02232	-0.08851	0.03504	0.001777	-0.12984
4	rs12331356	4.82023	117885030	A	C	0.0234	0.01971	-0.09323	0.03169	0.001779	-0.11663
15	rs12148369	89.423	101767290	G	A	-0.04894	0.02848	0.1172	0.04491	0.001782	0.16614
1	rs2786508	3.37961	98141828	A	G	0.154	0.07355	-0.276	0.1164	0.001783	-0.43
2	rs12713982	55.3578	79448921	A	G	-0.005352	0.02005	0.1125	0.03195	0.001784	0.117852
3	rs162263	44.0808	78956204	C	A	0.04089	0.021	-0.08102	0.03289	0.001784	-0.12191
1	rs856119	125.88	158899747	C	A	-0.04296	0.02288	0.08901	0.03553	0.001789	0.13197
3	rs12635000	57.8004	26881106	A	G	0.07181	0.0203	-0.04766	0.03242	0.00179	-0.11947
8	rs278539	18.5241	94262608	A	G	-0.07711	0.0219	0.05458	0.03604	0.001792	0.13169
5	rs1989916	88.6363	136893719	A	G	-0.04782	0.0204	0.0713	0.03224	0.001794	0.11912
18	rs2851857	103.344	57244903	A	G	-0.02147	0.03499	0.1893	0.05771	0.001795	0.21077
7	rs12535571	34.5134	95069666	A	G	-0.01894	0.02125	0.1047	0.03343	0.001799	0.12364
4	rs11939608	190.044	174253938	A	G	0.1216	0.07317	-0.3241	0.1226	0.0018	-0.4457
4	rs6838230	133.647	184577177	G	A	-0.06146	0.02262	0.07513	0.03746	0.0018	0.13659
3	rs1445059	113.199	106159948	A	G	-0.03731	0.02062	0.08365	0.03281	0.001801	0.12096
4	rs17022539	110.575	148001517	A	G	-0.01934	0.03203	0.1687	0.05102	0.001801	0.18804
11	rs551711	28.5823	125567128	G	A	-0.06085	0.02665	0.09808	0.04339	0.001802	0.15893
3	rs6779739	164.05	168841534	A	C	-0.0245	0.0364	0.1885	0.05772	0.001805	0.213
8	rs7013899	55.0489	20656633	G	A	0.009226	0.0198	-0.1074	0.0317	0.001806	-0.116626
10	rs10825903	107.92	52160862	G	A	-0.07072	0.02901	0.09904	0.04602	0.001807	0.16976
17	rs4791347	69.1651	9262145	A	G	-0.07469	0.02832	0.09453	0.04625	0.001808	0.16922
2	rs10496307	92.0776	84378583	A	G	-0.005323	0.03428	-0.2128	0.05697	0.00181	-0.207477
8	rs4537289	75.687	124945090	A	G	0.06164	0.02458	-0.08362	0.03955	0.001811	-0.14526
1	rs6690512	52.1829	191340943	A	G	0.09482	0.0836	-0.4154	0.1406	0.001812	-0.51022
2	rs3791414	148.577	240032214	A	G	-0.02633	0.0264	0.1283	0.04194	0.001812	0.15463
2	rs7580177	78.0163	1693035	A	C	0.05643	0.02135	-0.06863	0.03393	0.001813	-0.12506
4	rs4356930	195.6	80635570	A	G	0.004297	0.02716	-0.1569	0.04396	0.001817	-0.161197
1	rs2518544	39.6105	158876921	G	A	-0.04474	0.02283	0.08636	0.03531	0.00182	0.1311
5	rs10940001	51.38	63960187	A	G	-0.01898	0.02027	0.1012	0.03279	0.001825	0.12018
12	rs6490156	87.028	118249043	G	A	0.02141	0.01952	-0.09519	0.03191	0.001827	-0.1166
22	rs137211	7.31808	26693227	A	G	0.06644	0.04501	-0.198	0.07191	0.001828	-0.26444
8	rs10094030	142.626	17518957	A	G	0.08166	0.04692	-0.1869	0.0723	0.001833	-0.26856
3	rs11130350	69.9745	53215875	A	C	-0.0254	0.02062	0.09724	0.03353	0.001834	0.12264
7	rs10226649	123.53	52510591	G	A	-0.05753	0.03149	0.129	0.0509	0.001834	0.18653
1	rs11207870	57.0815	40789927	A	G	-0.0381	0.02496	0.109	0.04009	0.001835	0.1471
4	rs4864099	58.7761	133005854	G	A	-0.04083	0.02007	0.07823	0.03252	0.001836	0.11906
1	rs11588057	168.306	205234575	A	G	-0.1131	0.08536	0.3862	0.1356	0.001837	0.4993
13	rs9523441	152.326	92524032	G	A	0.01683	0.01997	-0.1	0.03175	0.001838	-0.11683
4	rs34426652	77.26	2335396	G	A	-0.04861	0.02076	0.07388	0.03339	0.00184	0.12249
2	rs6725384	133.832	130433313	G	A	0.03343	0.02224	-0.09801	0.03586	0.001841	-0.13144
22	rs16983356	79.0122	27385773	G	A	-0.09116	0.0511	0.1999	0.07823	0.001842	0.29106
9	rs2777804	133.922	107571241	G	A	-0.02945	0.02141	0.09741	0.03465	0.001842	0.12686
4	rs13101958	46.8654	134538656	G	A	0.05129	0.02839	-0.1217	0.04777	0.001845	-0.17299
4	rs1431688	50.4326	133003374	A	C	-0.04144	0.02006	0.07753	0.03252	0.001847	0.11897
18	rs11151850	26.31	70950855	A	G	0.05976	0.02578	-0.09271	0.04164	0.001849	-0.15247
18	rs1371856	115.115	62559337	A	G	0.04634	0.01969	-0.06943	0.03155	0.00185	-0.11577
4	rs2726180	39.2556	108534358	C	A	0.0274	0.02008	-0.08985	0.03186	0.00185	-0.11725
12	rs11062538	165.749	3264901	A	G	0.004004	0.026	0.1537	0.04044	0.001851	0.149696
12	rs796051	66.49	89740864	G	A	-0.05811	0.02469	0.08801	0.03992	0.001851	0.14612
2	rs10754981	92.1958	174243909	A	G	0.06002	0.02321	-0.07563	0.03689	0.001854	-0.13565
4	rs17004812	161.236	80989462	A	G	0.07523	0.03764	-0.1466	0.06052	0.001855	-0.22183
16	rs7187932	33.9513	56931704	A	G	-0.0316	0.02614	0.1249	0.04295	0.001857	0.1565
7	rs193562	88.082	116811037	G	A	-0.02956	0.02471	0.1187	0.04075	0.001858	0.14826
21	rs2000461	42.3039	35019377	A	G	-0.01803	0.02127	0.1049	0.03329	0.001861	0.12293
1	rs6703448	107.16	151909453	C	A	-0.04952	0.02171	0.0752	0.03371	0.001866	0.12472
2	rs17039201	184.405	49947538	A	G	0.1317	0.04701	-0.1359	0.07206	0.001869	-0.2676
5	rs6889677	104.57	14039647	A	G	-0.02329	0.02725	0.135	0.04297	0.001871	0.15829
4	rs931885	100.824	189433594	G	A	0.03917	0.01984	-0.07642	0.03143	0.001873	-0.11559
3	rs361021	112.184	13045495	G	A	-0.01637	0.01941	0.09915	0.03168	0.001874	0.11552
12	rs9651929	43.6523	80290389	A	G	-0.03938	0.05867	0.3052	0.09405	0.00188	0.34458
11	rs163607	99.4152	72205699	A	G	-0.03655	0.02002	0.07907	0.03136	0.001884	0.11562
11	rs11224105	77.8435	134822929	C	A	-0.03702	0.02028	0.0824	0.03264	0.001885	0.11942
19	rs2974216	129.4	48088627	A	G	-0.05071	0.02964	0.1238	0.04769	0.001885	0.17451
5	rs7706191	100.68	7632077	A	G	-0.09022	0.03101	0.08674	0.04776	0.001887	0.17696
8	rs1971079	132.205	5990329	G	A	-0.02481	0.0207	0.09612	0.03296	0.001889	0.12093
17	rs12939117	165.602	9203143	A	G	-0.03275	0.02821	0.1327	0.04519	0.001893	0.16545
16	rs11639620	110.302	67073552	G	A	0.06063	0.02643	-0.09407	0.04222	0.001899	-0.1547
1	rs454510	164.045	120195042	A	G	0.02187	0.02134	-0.1045	0.03467	0.001899	-0.12637
13	rs7320808	16.6634	108340863	A	G	-0.07238	0.04323	0.1723	0.06588	0.0019	0.24468
8	rs7016989	78.6561	111822043	G	A	0.02079	0.04388	0.2876	0.07387	0.0019	0.26681
12	rs28365207	202.887	40616414	G	A	-0.09412	0.04776	0.1939	0.07952	0.001901	0.28802
9	rs4842161	75.656	137659688	C	A	0.04079	0.01976	-0.07612	0.03205	0.001903	-0.11691
12	rs6582090	59.8317	72893918	C	A	0.05463	0.0234	-0.08017	0.03658	0.001907	-0.1348
4	rs13116042	46.7413	184197313	A	G	0.01011	0.0301	-0.1691	0.04925	0.001908	-0.17921
3	rs734184	43.7586	59554896	A	G	-0.0436	0.01979	0.0728	0.03185	0.001909	0.1164
5	rs11948266	16.8824	121522316	G	A	0.04986	0.02538	-0.1005	0.04125	0.00191	-0.15036
19	rs4932932	178.886	22203214	A	G	-0.05582	0.0282	0.1082	0.04471	0.001911	0.16402
6	rs9261922	212.678	30392146	A	G	0.06918	0.02495	-0.08386	0.04253	0.001911	-0.15304
18	rs12458786	51.2603	23030650	A	G	0.02767	0.03331	-0.1644	0.05216	0.001912	-0.19207
10	rs2339732	139.565	52927242	C	A	0.008202	0.01992	-0.108	0.0317	0.001914	-0.116202
2	rs3789727	189.712	110907324	A	G	0.07731	0.02647	-0.07905	0.04288	0.001916	-0.15636
19	rs2074206	70.2144	58116143	A	C	0.06324	0.02462	-0.08263	0.04005	0.001919	-0.14587
20	rs6117434	202.083	731474	A	G	0.01573	0.03317	-0.1788	0.05322	0.00192	-0.19453
9	rs7023577	15.0352	96336993	G	A	-0.01909	0.01976	0.09735	0.03192	0.001922	0.11644
8	rs7829476	57.1558	135607485	A	G	-0.04058	0.02378	0.0992	0.03829	0.001928	0.13978
18	rs12964576	86.7826	56360397	G	A	0.02309	0.0233	-0.1139	0.03752	0.00193	-0.13699
16	rs9929395	26.19	56929901	G	A	-0.0336	0.027	0.1272	0.04426	0.001931	0.1608
2	rs17368508	80.5791	123818682	C	A	-0.0646	0.02681	0.08957	0.04187	0.001931	0.15417
19	rs4804078	187.609	8787140	A	C	0.02984	0.02509	-0.1138	0.03896	0.001932	-0.14364
3	rs262996	59.7784	183473203	G	A	0.01609	0.01997	-0.1007	0.03195	0.001939	-0.11679
3	rs6802120	51.61	178343683	A	G	0.05188	0.0274	-0.105	0.04255	0.00194	-0.15688
2	rs10490309	82.1416	75503870	G	A	-0.09934	0.04319	0.1632	0.07287	0.001941	0.26254
2	rs9646729	82.8898	167618745	C	A	-0.007468	0.03179	0.1785	0.0509	0.001945	0.185968
8	rs4734805	83.8955	105700583	G	A	0.07769	0.02658	-0.07652	0.04208	0.001945	-0.15421
14	rs11159308	10.0705	78374783	A	G	-0.05508	0.02257	0.07668	0.03604	0.001946	0.13176
2	rs17043407	101.561	115473521	A	G	0.01651	0.02038	-0.1036	0.033	0.001948	-0.12011
9	rs1124729	51.2088	124900274	G	A	0.01183	0.02038	-0.1069	0.03246	0.001949	-0.11873
18	rs11564296	75.477	25799959	G	A	-0.04566	0.0266	0.1111	0.04305	0.001952	0.15676
5	rs1002424	92.06	40767397	G	A	-0.06233	0.02231	0.06908	0.03608	0.001952	0.13141
12	rs1386483	37.5874	72412494	A	G	-0.0008855	0.02026	0.1166	0.03206	0.001953	0.1174855
19	rs973009	20.2558	39174332	G	A	-0.03625	0.02848	0.1325	0.04645	0.001953	0.16875
5	rs10064957	105.812	150049655	C	A	0.06782	0.0477	-0.2068	0.07476	0.001955	-0.27462
7	rs4024044	72.5465	48364245	G	A	-0.02431	0.02463	0.1209	0.0399	0.001955	0.14521
10	rs1904677	34.1465	52931142	G	A	0.01105	0.01989	-0.1045	0.03155	0.001956	-0.11555
11	rs11215467	176.972	115162376	G	A	-0.05456	0.03167	0.1236	0.04802	0.001959	0.17816
5	rs7380362	57.1762	84177660	A	G	0.04666	0.02215	-0.08193	0.03513	0.001959	-0.12859
3	rs12494371	91.71	135028331	G	A	-0.03641	0.02505	0.1109	0.04046	0.00196	0.14731
18	rs585187	65.85	58177124	A	C	0.0335	0.0197	-0.08019	0.03099	0.001962	-0.11369
3	rs1918964	145.033	169211767	G	A	-0.04321	0.01975	0.07236	0.03168	0.001962	0.11557
19	rs11878872	65.9824	48512634	A	G	0.03974	0.02849	-0.1233	0.0443	0.001964	-0.16304
11	rs11231080	29.9407	55561447	A	G	-0.03012	0.02183	0.09779	0.03508	0.001965	0.12791
18	rs2705366	154.128	43114792	G	A	-0.03716	0.03543	-0.2446	0.0569	0.001967	-0.20744
2	rs1983470	5.41608	184957166	G	A	0.01338	0.02168	-0.1135	0.03479	0.001969	-0.12688
10	rs10824799	277.87	54537089	G	A	0.03078	0.02324	-0.1051	0.03726	0.001978	-0.13588
15	rs3829490	108.103	90773059	A	G	-0.04067	0.02312	0.09665	0.03789	0.001978	0.13732
3	rs3821476	88.0152	59935451	A	G	-0.02297	0.02077	0.09712	0.03279	0.001978	0.12009
1	rs12133873	178.817	246116195	A	C	-0.06255	0.02503	0.08267	0.03972	0.001979	0.14522
22	rs9610320	28.2969	35976191	A	C	0.05344	0.02359	-0.08267	0.03716	0.001986	-0.13611
5	rs10064948	68.9	42315700	G	A	-0.05552	0.04031	0.1747	0.06263	0.001992	0.23022
13	rs9543290	43.8229	73819447	A	G	0.02051	0.029	-0.1524	0.04784	0.001993	-0.17291
7	rs6977897	66.9188	77693385	A	G	0.04022	0.01979	-0.07627	0.03208	0.001994	-0.11649
17	rs9674957	43.24	69111098	A	G	0.03103	0.02027	-0.08762	0.0326	0.001995	-0.11865
16	rs5801	55.4815	56913513	A	G	-0.05272	0.02891	0.1173	0.04679	0.001999	0.17002
2	rs1192277	151.924	85055822	G	A	0.04633	0.02895	-0.1265	0.04787	0.002001	-0.17283
7	rs475811	39.96	138071567	A	G	0.04845	0.03065	-0.1272	0.04787	0.002001	-0.17565
13	rs7324034	100.561	34084266	C	A	0.009387	0.01966	-0.1045	0.03119	0.002002	-0.113887
12	rs3809192	174.228	117176552	A	G	0.03886	0.0315	-0.1411	0.04902	0.002008	-0.17996
21	rs2834216	57.1868	34821372	A	G	-0.03974	0.0218	0.0842	0.03369	0.002009	0.12394
12	rs10772725	103.704	14232033	G	A	-0.00342	0.02167	-0.1298	0.03469	0.00201	-0.12638
3	rs6789637	15.8406	170201640	A	G	0.01282	0.02078	-0.11	0.03392	0.00201	-0.12282
4	rs17322390	23.2588	77523129	A	G	0.02821	0.02052	-0.0908	0.03262	0.002012	-0.11901
1	rs4838959	213.906	113085721	A	C	-0.01974	0.01978	0.09515	0.03153	0.002021	0.11489
11	rs988873	45.1571	115189228	G	A	-0.05044	0.02445	0.08938	0.03813	0.002023	0.13982
13	rs1333410	67.134	81795588	G	A	-0.131	0.0912	0.3934	0.1433	0.002023	0.5244
2	rs2269352	148.509	234512976	G	A	0.03212	0.02256	-0.09957	0.03621	0.002025	-0.13169
5	rs17053082	70.385	155394230	A	G	0.09044	0.0438	-0.1617	0.06895	0.002025	-0.25214
1	rs1252160	38.5397	237165077	A	G	0.03363	0.02786	-0.1352	0.04708	0.002028	-0.16883
12	rs4766108	140.832	3460879	A	G	0.05075	0.02038	-0.06647	0.03205	0.002029	-0.11722
3	rs479652	140.258	74380566	G	A	0.03223	0.02026	-0.08492	0.03212	0.002037	-0.11715
16	rs12446321	7.88872	59574497	G	A	0.03394	0.02362	-0.104	0.03799	0.00204	-0.13794
2	rs7563543	38.6279	26854065	A	G	-0.03357	0.0201	0.08328	0.03212	0.002043	0.11685
4	rs17041821	31.797	111392963	A	G	0.05452	0.03482	-0.1512	0.05694	0.00205	-0.20572
11	rs12421901	9.14319	113863209	A	G	-0.1717	0.1005	0.3544	0.138	0.002051	0.5261
1	rs1338319	29.7492	48957540	C	A	-0.05276	0.06388	0.3161	0.1012	0.002052	0.36886
13	rs9579598	100.18	31116998	G	A	0.04851	0.02526	-0.09418	0.03879	0.002054	-0.14269
11	rs513083	34.6278	116330732	A	G	0.03895	0.0202	-0.07784	0.03206	0.002055	-0.11679
7	rs7779963	122.225	95902397	A	C	-0.06953	0.02079	0.05308	0.03392	0.002055	0.12261
2	rs925825	42.2136	189748646	G	A	-0.02551	0.02051	0.09269	0.03242	0.002061	0.1182
5	rs4866772	76.2528	44208106	G	A	-0.01552	0.02935	0.1591	0.04847	0.002062	0.17462
2	rs9287721	76.6769	10815833	G	A	0.03105	0.02097	-0.09168	0.03387	0.002063	-0.12273
2	rs13431169	60.8165	88549952	A	G	0.03912	0.02653	-0.1148	0.04235	0.002064	-0.15392
2	rs2422173	137.62	75777968	A	G	0.04707	0.0198	-0.06792	0.03165	0.002067	-0.11499
8	rs2970646	20.1706	36834333	C	A	0.03142	0.02012	-0.08563	0.03224	0.002067	-0.11705
2	rs3771254	107.43	20406245	A	G	-0.05898	0.03357	0.1365	0.05387	0.002068	0.19548
12	rs7132636	81.4155	3473418	C	A	-0.08279	0.02771	0.08298	0.04614	0.00207	0.16577
14	rs10483786	110.62	66733526	A	G	0.09733	0.04331	-0.141	0.06414	0.00207	-0.23833
7	rs10271079	102.15	48272516	A	G	-0.06037	0.02041	0.05863	0.03281	0.00207	0.119
15	rs10518725	50.3971	53815752	A	G	0.06191	0.02514	-0.0814	0.03916	0.002072	-0.14331
16	rs12447988	153.982	13681347	G	A	-0.04028	0.0314	0.1403	0.04951	0.002072	0.18058
6	rs9497578	104.163	146929483	A	C	-0.07447	0.03663	0.1388	0.05879	0.002077	0.21327
7	rs7786287	117.158	122896288	A	G	0.05556	0.02311	-0.08098	0.03785	0.002077	-0.13654
6	rs2181111	76.8824	7624941	C	A	0.05386	0.01963	-0.06042	0.03151	0.00208	-0.11428
2	rs1564241	44.0814	218320757	A	G	0.05255	0.02903	-0.1155	0.04623	0.002081	-0.16805
9	rs10992674	70.5277	95963114	G	A	0.0611	0.02058	-0.05837	0.03291	0.002084	-0.11947
3	rs13081936	95.4949	59940778	A	G	0.006902	0.02022	-0.1078	0.03132	0.002085	-0.114702
11	rs7120013	86.54	46155938	A	G	0.03199	0.01948	-0.08192	0.03147	0.002086	-0.11391
3	rs996424	157.951	1165633	C	A	0.03039	0.02	-0.0854	0.03187	0.002087	-0.11579
1	rs4295913	72.5107	82837212	C	A	-0.01581	0.02006	0.1037	0.03325	0.002088	0.11951
12	rs782116	76.4615	58842292	G	A	0.03884	0.02077	-0.08313	0.03376	0.002089	-0.12197
10	rs17109372	174.961	95525331	A	C	0.01364	0.02427	-0.1301	0.03991	0.002091	-0.14374
12	rs1426624	39.7867	119665735	G	A	0.06577	0.01995	-0.05048	0.03208	0.002092	-0.11625
18	rs16962522	22.9379	19619704	G	A	-0.05796	0.03395	0.1354	0.05291	0.002093	0.19336
3	rs6772329	157.97	186914603	A	G	0.05455	0.03571	-0.1546	0.05785	0.002093	-0.20915
6	rs12215325	51.0714	161802448	G	A	-0.08076	0.02456	0.06357	0.03998	0.002101	0.14433
2	rs6711697	58.5557	38055544	G	A	0.002372	0.02191	-0.1251	0.03516	0.002102	-0.127472
3	rs6446102	277.866	59957116	A	G	-0.002609	0.02015	0.1136	0.03196	0.002104	0.116209
5	rs7730230	86.0821	142915171	G	A	0.035	0.02194	-0.09287	0.03532	0.002105	-0.12787
21	rs2833681	110.011	33519161	C	A	-0.2555	0.08582	0.2138	0.1262	0.002108	0.4693
16	rs12445698	4.94287	56928216	A	G	-0.03503	0.02699	0.1245	0.04432	0.002109	0.15953
19	rs12611321	146.198	49053248	A	G	-0.08173	0.03079	0.09747	0.0495	0.00211	0.1792
9	rs10781542	6.59513	139327439	G	A	0.002419	0.01973	0.1165	0.03142	0.00211	0.114081
2	rs4851383	82.0954	101560758	G	A	0.01827	0.01996	-0.0967	0.03163	0.002112	-0.11497
10	rs7919114	9.83632	14672121	A	G	-0.05881	0.05998	0.2876	0.09543	0.002113	0.34641
13	rs9551823	125.4	30662049	G	A	0.05066	0.03927	-0.1758	0.06233	0.002114	-0.22646
6	rs7762476	107.878	134633308	A	G	-0.0536	0.04093	0.1879	0.06706	0.002115	0.2415
12	rs2098963	8.44757	40780270	A	G	-0.05354	0.02596	0.092	0.03961	0.002117	0.14554
14	rs11850195	18.4409	93326861	A	G	-0.04643	0.03023	0.129	0.04844	0.002118	0.17543
16	rs2292324	159.735	84028014	G	C	0.04544	0.03211	-0.1447	0.05287	0.002119	-0.19014
1	rs3911890	107.506	204030721	A	G	-0.02836	0.02276	0.1026	0.03602	0.002119	0.13096
1	rs3912023	165.119	11630122	A	G	0.02304	0.03171	-0.1594	0.05018	0.00212	-0.18244
9	rs7019001	70.1279	96291224	A	G	-0.02039	0.01977	0.09499	0.03193	0.00212	0.11538
2	rs12053303	81.0136	161542328	G	A	0.02442	0.02036	-0.09171	0.03184	0.002124	-0.11613
12	rs11173297	200.814	60434728	C	A	-0.1789	0.07749	0.2689	0.1234	0.002125	0.4478
14	rs234220	104.841	98039922	G	A	0.02579	0.01973	-0.08757	0.03118	0.002125	-0.11336
6	rs7765283	72.55	135842804	A	G	-0.1004	0.0693	0.3115	0.1148	0.002126	0.4119
6	rs7775279	114.85	74693901	G	A	-0.03591	0.02093	0.08688	0.03406	0.002128	0.12279
17	rs1056292	107.471	1204124	A	G	-0.06433	0.02382	0.07214	0.03751	0.00213	0.13647
5	rs10516130	263.126	174769272	A	G	-0.0212	0.02724	0.1393	0.0446	0.00213	0.1605
10	rs11190037	142.09	101051812	A	G	-0.03657	0.02833	0.1254	0.04449	0.002134	0.16197
16	rs12447287	73.5455	56937998	G	A	-0.02872	0.02287	0.1061	0.03748	0.002134	0.13482
1	rs1008987	148.27	198333063	G	A	-0.09775	0.03457	0.09752	0.05337	0.002134	0.19527
3	rs4681158	150.294	148539284	G	A	0.02943	0.021	-0.09261	0.03375	0.002136	-0.12204
3	rs705298	32.9324	194275435	G	A	0.07532	0.02358	-0.0636	0.03862	0.002136	-0.13892
9	rs10973276	170.058	37260487	A	G	0.06859	0.04714	-0.2006	0.07393	0.002138	-0.26919
1	rs2383513	127.251	186599524	G	A	-0.01443	0.02914	0.1522	0.0458	0.002141	0.16663
2	rs608974	19.1645	4485192	G	A	0.05362	0.02344	-0.08249	0.03764	0.002141	-0.13611
7	rs16101	133.938	24344323	G	A	-0.05884	0.02846	0.1051	0.04519	0.002142	0.16394
4	rs1431686	93.4501	132980813	A	G	-0.04048	0.02011	0.07655	0.03239	0.002143	0.11703
4	rs4695945	167.44	175571589	A	G	-0.0612	0.0218	0.06742	0.03578	0.002145	0.12862
4	rs13106321	167.775	134489656	G	A	0.0579	0.02833	-0.1123	0.04766	0.002146	-0.1702
4	rs1708676	85.0684	89974554	C	A	0.06416	0.04719	-0.2125	0.07681	0.002147	-0.27666
13	rs9516696	48.2258	87927450	C	A	0.03313	0.02567	-0.1209	0.04313	0.002148	-0.15403
6	rs7764938	70.11	144220404	A	G	-0.03588	0.02364	0.1018	0.03815	0.00215	0.13768
9	rs2152210	125.559	29845253	A	C	0.03374	0.01971	-0.08052	0.03159	0.002151	-0.11426
14	rs225995	37.2838	30493712	A	G	0.0343	0.02172	-0.09308	0.03538	0.002152	-0.12738
2	rs250900	3.90112	235034610	C	A	0.05762	0.02862	-0.1029	0.04379	0.002152	-0.16052
19	rs8110307	138.49	1309647	A	G	-0.02832	0.05437	0.2934	0.08964	0.002154	0.32172
15	rs11161247	105.623	26118910	A	C	-0.09233	0.03707	0.1218	0.05916	0.00216	0.21413
13	rs1553705	6.1663	108492897	G	A	0.02651	0.0239	-0.1129	0.03868	0.002161	-0.13941
3	rs212051	47.2881	60034455	A	G	0.01974	0.02182	-0.106	0.03472	0.002161	-0.12574
17	rs9916167	111.647	15094180	G	A	0.02848	0.02369	-0.1117	0.03907	0.002163	-0.14018
8	rs9650076	55.42	120133272	G	A	-0.04513	0.02057	0.07393	0.03293	0.002164	0.11906
12	rs1706673	57.9569	17744821	A	G	-0.04885	0.02293	0.08163	0.03584	0.002165	0.13048
11	rs4565893	46.0021	21632174	G	A	0.02832	0.01971	-0.08615	0.0317	0.002166	-0.11447
3	rs13083227	81.1135	11948258	A	C	-0.0316	0.0204	0.0882	0.03333	0.002171	0.1198
13	rs7996348	110.377	103272017	A	G	-0.04531	0.03362	0.1519	0.05486	0.002172	0.19721
4	rs7680727	80.6152	53472171	G	A	0.004839	0.03405	-0.1878	0.05282	0.002174	-0.192639
5	rs2304034	61.3388	148410920	C	A	-0.08149	0.02877	0.08675	0.04674	0.002174	0.16824
12	rs11611501	37.8408	130533750	A	G	0.02113	0.024	-0.115	0.03738	0.002176	-0.13613
2	rs1503242	61.3518	68097760	A	C	-0.04417	0.03577	0.1682	0.05934	0.00218	0.21237
3	rs262992	168.571	183477126	G	A	0.0182	0.01997	-0.09729	0.03196	0.00218	-0.11549
5	rs10491469	47.708	63959834	A	C	-0.01794	0.0203	0.1003	0.0328	0.00218	0.11824
1	rs209690	55.2561	22922800	A	G	0.007998	0.03256	-0.1816	0.05262	0.002182	-0.189598
2	rs2082875	153.388	115511716	A	G	0.03562	0.0204	-0.08346	0.03308	0.002183	-0.11908
2	rs12614560	60.8631	42427002	G	A	-0.03675	0.01974	0.07769	0.03171	0.002186	0.11444
12	rs7961005	38.4207	75849475	G	A	-0.05076	0.02784	0.1129	0.04559	0.002191	0.16366
15	rs12050872	12.3767	33053468	A	C	-0.05887	0.02552	0.0877	0.04049	0.002195	0.14657
16	rs12597696	28.4381	12540424	G	A	-0.02886	0.02053	0.0896	0.03279	0.002196	0.11846
9	rs10977679	173.701	9352861	G	A	0.03603	0.01988	-0.07678	0.03102	0.002198	-0.11281
4	rs6827817	44.997	88330987	A	G	-0.03333	0.01956	0.08012	0.03148	0.002206	0.11345
7	rs13228098	83.56	89856433	A	G	-0.0961	0.05572	0.2367	0.09335	0.002206	0.3328
22	rs7289738	128.183	27379830	G	A	-0.05214	0.03252	0.1391	0.05336	0.002207	0.19124
10	rs1904694	6.16477	52905494	G	A	0.01732	0.02006	-0.09808	0.03193	0.00221	-0.1154
3	rs194706	114.958	38355917	A	G	-0.04584	0.04857	0.2391	0.07943	0.002213	0.28494
10	rs6479991	58.5615	52936188	G	A	0.006147	0.01993	-0.1084	0.0317	0.002214	-0.114547
3	rs34037947	60.3853	108896155	A	G	-0.1984	0.09117	0.3698	0.1618	0.002214	0.5682
1	rs2999508	80.6094	151934447	A	C	-0.04543	0.02017	0.06915	0.03155	0.002215	0.11458
16	rs185042	49.3956	66883119	A	G	-0.03094	0.01996	0.08493	0.03218	0.002216	0.11587
18	rs9950541	213.143	56350396	C	A	0.01067	0.02194	-0.1159	0.03507	0.002216	-0.12657
3	rs540365	58.6203	74378567	A	C	0.04143	0.02097	-0.07941	0.03347	0.002218	-0.12084
4	rs1440304	72.2157	117888361	G	A	0.02294	0.0197	-0.09093	0.03157	0.002218	-0.11387
9	rs1410846	67.468	23788680	A	G	0.05738	0.02128	-0.06891	0.03538	0.002218	-0.12629
4	rs17037547	118.941	108127486	G	A	0.05847	0.0392	-0.1685	0.06301	0.00222	-0.22697
13	rs4769707	43.6767	29824465	A	G	0.03578	0.05694	-0.2849	0.08802	0.002222	-0.32068
15	rs12440844	102.23	53854322	A	C	-0.03974	0.0211	0.0818	0.03367	0.002223	0.12154
3	rs6551000	160.94	25913883	A	G	0.05435	0.02389	-0.08498	0.0388	0.002229	-0.13933
14	rs1158081	104.807	79173250	G	A	0.0183	0.02521	-0.1252	0.03958	0.002231	-0.1435
6	rs411136	15.0545	33408542	A	G	-0.008853	0.01991	0.1065	0.03203	0.002231	0.115353
21	rs9975710	63.7986	41400858	G	A	0.05042	0.02654	-0.105	0.04335	0.002235	-0.15542
1	rs4915518	28.8344	201312346	G	A	-0.01941	0.021	0.1028	0.03401	0.002236	0.12221
2	rs1524915	227.368	155219508	C	A	0.03848	0.02147	-0.08589	0.03456	0.002237	-0.12437
10	rs1801241	111.912	16918972	G	A	0.09715	0.04578	-0.1708	0.07476	0.002238	-0.26795
19	rs4806716	100.102	54639868	G	A	0.05506	0.02465	-0.08777	0.03971	0.002241	-0.14283
11	rs17237067	55.0734	95904791	A	C	0.002183	0.03899	0.2225	0.06063	0.002242	0.220317
3	rs328049	275.502	78985805	A	G	-0.01358	0.01962	0.1007	0.03183	0.00225	0.11428
5	rs171742	77.7483	132927454	A	G	-0.01857	0.02004	0.09521	0.03139	0.002251	0.11378
7	rs10282266	47.9321	37359548	A	G	-0.01905	0.03222	0.1667	0.05157	0.002252	0.18575
2	rs1192395	241.453	85024731	A	G	0.04597	0.02906	-0.1252	0.04791	0.002253	-0.17117
19	rs12151343	129.826	8789773	A	G	0.02772	0.02506	-0.1134	0.03881	0.00226	-0.14112
9	rs10986273	136.311	126969598	A	G	-0.01557	0.02419	0.1269	0.03991	0.002264	0.14247
7	rs6970817	95.884	17746655	A	G	0.02581	0.01997	-0.09111	0.03268	0.002265	-0.11692
3	rs7614435	51.5265	28887146	A	C	0.01101	0.01983	-0.1029	0.03161	0.002266	-0.11391
1	rs11576398	243.896	193265225	A	G	-0.06296	0.03387	0.1211	0.04987	0.002267	0.18406
5	rs11744988	122.867	42474696	A	G	-0.04746	0.04047	0.1794	0.06232	0.002268	0.22686
7	rs1568629	60.3664	150239113	G	A	-0.03083	0.02765	0.1276	0.04391	0.002269	0.15843
20	rs2904155	113.887	50963243	A	G	0.03999	0.0203	-0.07856	0.03311	0.002271	-0.11855
2	rs4971552	1.92588	50302978	G	A	-0.01055	0.01958	0.1043	0.03215	0.002274	0.11485
12	rs10843660	64.6889	30368457	A	G	-0.04801	0.02015	0.06685	0.03179	0.002278	0.11486
14	rs6573638	175.602	66328997	G	A	0.07317	0.02739	-0.08691	0.04475	0.002279	-0.16008
7	rs3735141	77.1058	65420340	G	A	0.1031	0.04875	-0.1956	0.08491	0.002279	-0.2987
12	rs7967001	83.2747	72955245	G	A	0.06202	0.02338	-0.07108	0.03684	0.002284	-0.1331
1	rs1877720	149.775	48824407	A	G	-0.1163	0.05681	0.2089	0.09023	0.002286	0.3252
3	rs802775	115.966	59968353	A	G	-0.02192	0.02235	0.1062	0.03556	0.002286	0.12812
1	rs11118448	137.121	220052720	G	A	-0.006278	0.02101	0.1143	0.03347	0.002287	0.120578
11	rs9666924	116.111	47540007	G	A	-0.05019	0.02784	0.1119	0.04527	0.00229	0.16209
8	rs10435648	80.6178	29587962	C	A	-0.04958	0.02866	0.1175	0.04669	0.00229	0.16708
19	rs436790	47.5668	44491927	A	G	-0.003035	0.02206	0.1239	0.03531	0.002292	0.126935
12	rs12425122	77.3812	75862495	A	G	-0.04996	0.02779	0.1129	0.04559	0.002294	0.16286
13	rs7317164	228.68	108787344	A	G	-0.08535	0.05236	0.2232	0.08658	0.002294	0.30855
6	rs10456081	119.098	35925798	A	G	0.03437	0.02358	-0.1029	0.03835	0.002295	-0.13727
10	rs7895100	177.098	87683328	A	G	-0.06423	0.02968	0.1036	0.04637	0.002297	0.16783
18	rs7238078	31.666	56384192	C	A	0.02152	0.0233	-0.1131	0.03752	0.002298	-0.13462
6	rs10947580	10.3882	35939688	A	G	0.03579	0.02356	-0.1014	0.03834	0.002298	-0.13719
5	rs4866941	41.3555	42617492	A	G	-0.004607	0.02309	0.1261	0.03612	0.002302	0.130707
8	rs12716634	80.7816	573646	A	G	0.02771	0.0229	-0.1046	0.03688	0.002305	-0.13231
11	rs11217913	31.7857	120417553	G	A	0.03181	0.02159	-0.09231	0.03454	0.002307	-0.12412
6	rs6456190	80.7946	170554601	A	G	-0.06932	0.02652	0.08265	0.04223	0.002307	0.15197
22	rs738142	12.5189	39196937	A	G	0.06336	0.02528	-0.08259	0.04067	0.002308	-0.14595
21	rs4501026	101.045	29447212	C	A	-0.02854	0.02056	0.09043	0.03319	0.00231	0.11897
2	rs2901807	73.3918	66082215	A	G	0.02218	0.02822	-0.1417	0.04578	0.002313	-0.16388
5	rs3763120	137.936	141049407	A	G	0.04196	0.0199	-0.07204	0.03169	0.002316	-0.114
10	rs11187665	24.3074	95542677	A	G	-0.03278	0.01953	0.07995	0.03143	0.002318	0.11273
7	rs9648119	87.5476	9334068	G	A	0.03515	0.02195	-0.09055	0.03496	0.002325	-0.1257
9	rs4977467	88.6406	18927177	C	A	0.02472	0.02756	-0.1338	0.04414	0.002325	-0.15852
10	rs11251793	11.2907	3282738	G	A	0.001557	0.0225	0.1319	0.0364	0.002327	0.130343
12	rs10879357	10.0067	72414563	A	G	-0.0003145	0.01997	0.1136	0.03163	0.002332	0.1139145
12	rs12366669	162.82	26591898	A	G	0.05567	0.02018	-0.06118	0.03265	0.002332	-0.11685
3	rs16835753	28.0545	124349120	A	G	-0.02471	0.02053	0.09655	0.03413	0.002332	0.12126
9	rs1806664	172.148	108626502	G	A	-0.09597	0.04341	0.154	0.06971	0.002332	0.24997
6	rs9399258	95.7881	139167579	A	G	-0.002356	0.01951	-0.1151	0.03149	0.002337	-0.112744
12	rs10879312	215.659	72074735	A	C	-0.08996	0.03448	0.1061	0.05443	0.00234	0.19606
4	rs11943937	108.09	190292844	A	G	-0.007666	0.02343	0.1255	0.03697	0.00234	0.133166
13	rs6490765	68.0275	23575968	G	A	0.03308	0.02581	-0.1159	0.04161	0.002341	-0.14898
20	rs4809773	54.2313	48884531	G	A	0.04958	0.02031	-0.06729	0.0326	0.002341	-0.11687
17	rs7215971	67.5078	9242118	A	G	0.05123	0.02316	-0.08189	0.03712	0.002345	-0.13312
13	rs4773783	19.7684	94929371	A	G	-0.05376	0.03396	0.1341	0.05156	0.002346	0.18786
7	rs11768067	55.9286	29136284	A	G	-0.06898	0.02603	0.08065	0.04172	0.002346	0.14963
14	rs12433428	1.97361	56885925	G	A	0.01156	0.02776	-0.143	0.04255	0.002347	-0.15456
20	rs6036204	13.5737	22725487	G	A	0.0121	0.02073	-0.1074	0.03335	0.002349	-0.1195
15	rs1553893	121.731	26114658	G	A	-0.09322	0.03709	0.1195	0.05929	0.00235	0.21272
21	rs2096462	34.6735	33522718	A	G	-0.251	0.08614	0.2138	0.1262	0.002354	0.4648
11	rs4758405	172.421	6324634	A	G	-0.02026	0.01977	0.09539	0.03249	0.002357	0.11565
17	rs16955023	100.201	5636209	G	A	0.06802	0.02333	-0.06559	0.03723	0.002357	-0.13361
9	rs4242594	30.83	92310657	A	C	-0.03482	0.02016	0.08049	0.03212	0.002357	0.11531
14	rs1552126	85.2697	97994090	G	A	-0.03592	0.0197	0.07875	0.03215	0.002358	0.11467
1	rs269093	160.729	112639472	C	A	0.02776	0.0214	-0.09777	0.0353	0.002358	-0.12553
1	rs16825687	83.56	186617717	C	A	-0.01487	0.0292	0.1509	0.04603	0.002361	0.16577
1	rs1094653	110.162	231794794	A	C	-0.03751	0.01989	0.07649	0.03178	0.002362	0.114
21	rs2829775	99.3032	26860307	C	A	0.05876	0.03388	-0.1339	0.05356	0.002368	-0.19266
2	rs10932715	80.12	218259783	G	A	0.01898	0.02612	-0.129	0.0411	0.002368	-0.14798
2	rs1955086	21.9095	222692046	G	A	0.04669	0.0238	-0.08885	0.03771	0.002368	-0.13554
11	rs16910295	66.4478	12009569	A	G	-0.08624	0.04011	0.1414	0.06327	0.002371	0.22764
14	rs225890	134.758	30468542	C	A	0.02838	0.02574	-0.1204	0.04163	0.002372	-0.14878
13	rs1336846	254.902	23682836	C	A	-0.0425	0.0254	0.1025	0.04039	0.002374	0.145
1	rs504775	172.885	15649031	A	G	-0.03488	0.0206	0.08335	0.033	0.002374	0.11823
20	rs6061373	55.2577	59993899	G	A	0.01155	0.02187	0.1371	0.03505	0.002376	0.12555
18	rs2215502	96.3725	25784019	A	G	-0.03851	0.02126	0.08458	0.03449	0.002381	0.12309
9	rs4144534	42.1661	82361923	C	A	-0.04136	0.01969	0.07184	0.03164	0.002386	0.1132
15	rs1919360	36.2863	33043455	A	G	-0.05614	0.02557	0.08976	0.04066	0.002388	0.1459
18	rs9964652	99.5648	25155323	G	A	-0.0165	0.03076	0.1586	0.04876	0.002389	0.1751
6	rs9388133	21.2245	123075986	G	A	-0.06053	0.02795	0.09789	0.04404	0.002389	0.15842
18	rs9953011	46.14	25156448	A	G	-0.01582	0.03103	0.1609	0.04923	0.00239	0.17672
11	rs509882	174.477	55321055	A	G	-0.0322	0.02263	0.0983	0.03654	0.002395	0.1305
13	rs10507384	148.403	28979480	C	A	0.07064	0.03685	-0.1355	0.05703	0.002397	-0.20614
3	rs9681121	107.939	31664171	A	G	-0.07165	0.02672	0.07654	0.04085	0.002397	0.14819
11	rs7107863	111.706	134411391	G	A	-0.02293	0.02293	0.1085	0.03672	0.002398	0.13143
1	rs12047135	4.19109	204777269	A	G	-0.04201	0.03284	0.1447	0.05199	0.002399	0.18671
9	rs4617217	108.285	95988968	G	A	0.03484	0.02662	-0.1179	0.0427	0.0024	-0.15274
16	rs9922459	163.258	83968805	G	A	0.00451	0.02163	-0.1203	0.03498	0.002402	-0.12481
17	rs7226359	62.4213	79158006	A	G	0.0451	0.04401	-0.2067	0.07032	0.002403	-0.2518
1	rs4658489	118.39	242767951	A	G	0.04991	0.01967	-0.06301	0.03158	0.002404	-0.11292
1	rs2036444	92.02	77558358	A	G	-0.01403	0.02511	0.1309	0.04061	0.002405	0.14493
7	rs10250763	153.72	52622294	A	C	-0.06326	0.03147	0.1191	0.05118	0.002407	0.18236
9	rs11789176	15.7899	96196166	G	A	-0.0152	0.01985	0.09888	0.03193	0.002409	0.11408
1	rs4951182	22.8115	205236233	C	A	0.02826	0.01963	-0.08506	0.03177	0.00241	-0.11332
20	rs11907108	58.3278	22732148	A	G	0.01356	0.0219	-0.1111	0.03475	0.002415	-0.12466
7	rs7801922	117.541	90269990	A	G	-0.02443	0.01969	0.08852	0.0316	0.002416	0.11295
17	rs8077299	51.7238	17103251	G	A	-0.02451	0.01989	0.08947	0.03189	0.002421	0.11398
7	rs6583458	117.344	48279970	A	G	-0.03208	0.01966	0.08104	0.0317	0.002421	0.11312
11	rs1470254	77.2499	20121234	A	G	0.03189	0.02289	-0.1022	0.03784	0.002427	-0.13409
18	rs6506416	6.33376	6638382	C	A	0.0835	0.03275	-0.1101	0.05482	0.002432	-0.1936
8	rs2514933	113.534	119300988	G	A	-0.06553	0.03551	0.1363	0.0563	0.002432	0.20183
1	rs12137320	52.1627	246116352	A	G	-0.05689	0.02307	0.07409	0.03653	0.002433	0.13098
1	rs6694109	25.5674	29801397	C	A	-0.02916	0.02069	0.08995	0.03341	0.002437	0.11911
1	rs9887805	52.795	120085131	G	A	0.01665	0.02125	-0.1065	0.03463	0.002437	-0.12315
2	rs2382558	71.5422	1752229	G	A	0.05909	0.02173	-0.06587	0.03504	0.002437	-0.12496
8	rs13248650	161.705	75946695	C	A	-0.02365	0.02167	0.09922	0.03426	0.002439	0.12287
11	rs1470253	277.196	20121457	G	A	0.03321	0.02267	-0.09944	0.03745	0.002445	-0.13265
9	rs10739948	72.85	96150272	A	G	0.03327	0.01955	-0.07972	0.03176	0.002446	-0.11299
17	rs4328484	51.2001	69116230	A	G	0.02046	0.02047	-0.09643	0.0327	0.002447	-0.11689
13	rs1199894	109.072	22041045	A	C	0.01206	0.02066	-0.1071	0.03346	0.002449	-0.11916
15	rs8028561	165.929	51453635	G	A	0.08703	0.02782	-0.0748	0.04561	0.002454	-0.16183
10	rs1063119	100.998	81145535	A	G	-0.0335	0.02008	0.08161	0.03227	0.002456	0.11511
4	rs6448037	127.758	21215907	G	A	0.04316	0.02044	-0.07297	0.03244	0.002456	-0.11613
4	rs932100	165.871	108506584	A	G	0.02025	0.01979	-0.09242	0.03152	0.002467	-0.11267
11	rs17134219	51.2708	99566782	G	A	0.09988	0.03467	-0.09337	0.0536	0.00247	-0.19325
10	rs6601952	64.27	5413634	C	A	-0.01479	0.02178	0.1114	0.03556	0.002471	0.12619
6	rs9351814	80.3633	72193707	C	A	-0.05461	0.02	0.06014	0.03221	0.002473	0.11475
6	rs12197358	85.1393	138967387	G	A	0.01414	0.02486	0.1541	0.03899	0.002474	0.13996
2	rs17838576	88.442	155222220	A	G	0.03899	0.02242	-0.08866	0.03573	0.002475	-0.12765
2	rs7602048	53.4275	199453491	G	A	0.07971	0.06346	-0.2974	0.1073	0.002476	-0.37711
11	rs11030104	33.098	27684517	G	A	-0.02176	0.02453	0.1167	0.03861	0.002477	0.13846
6	rs12193414	51.6492	2293020	C	A	0.09247	0.02531	-0.04909	0.03934	0.002478	-0.14156
6	rs7755431	85.9401	43937518	G	A	-0.03011	0.02534	0.1137	0.04019	0.002478	0.14381
8	rs2935791	178.47	109733537	G	A	-0.02183	0.02072	0.0969	0.03332	0.002479	0.11873
13	rs9550895	0	23587273	G	A	-0.009421	0.02557	0.1375	0.04128	0.00248	0.146921
9	rs2226111	70.9237	75637712	A	C	-0.07396	0.04654	0.187	0.07263	0.00248	0.26096
8	rs2168053	155.087	4998837	G	A	-0.01365	0.02044	0.1035	0.03287	0.002481	0.11715
5	rs2548278	88.9849	100165117	A	G	-0.05273	0.0203	0.06116	0.0317	0.002483	0.11389
13	rs7327546	184.55	81138313	G	A	-0.03709	0.03759	0.1933	0.06624	0.002486	0.23039
3	rs526100	49.9569	16407973	G	A	0.05565	0.02037	-0.06106	0.03276	0.002486	-0.11671
8	rs2410092	36.5021	13435046	G	A	0.02078	0.02104	-0.0987	0.03344	0.00249	-0.11948
11	rs4936325	129.287	115125119	G	A	-0.087	0.02908	0.07528	0.0451	0.002492	0.16228
7	rs2428936	6.03576	77668942	G	A	0.05177	0.03451	-0.1426	0.05425	0.002496	-0.19437
13	rs9573234	43.2766	74104736	G	A	-0.2183	0.09387	0.2934	0.1408	0.002497	0.5117
11	rs7130530	15.18	115149728	G	A	-0.06985	0.0256	0.07607	0.04091	0.002498	0.14592
21	rs182694	98.0853	43698815	A	G	-0.04608	0.02036	0.07062	0.03279	0.002499	0.1167
4	rs1962363	53.9623	169428546	A	G	0.01338	0.01991	-0.09817	0.03107	0.002499	-0.11155
12	rs6487887	89.2509	30372257	A	G	-0.04786	0.02017	0.06598	0.0318	0.0025	0.11384
16	rs12923922	180.185	56931321	G	A	-0.02907	0.02606	0.1227	0.04291	0.002502	0.15177
9	rs12554810	105.658	129850075	A	G	0.2127	0.05396	-0.1111	0.09256	0.002509	-0.3238
17	rs280048	68.92	31983452	A	G	-0.09364	0.0254	0.05114	0.04062	0.002511	0.14478
11	rs11601717	59.9212	2492629	G	A	-0.06205	0.02047	0.05599	0.03327	0.002513	0.11804
3	rs2578309	81.7849	81036085	C	A	-0.03939	0.02178	0.08326	0.03425	0.002513	0.12265
10	rs4531389	166.445	95541735	A	G	0.02339	0.01954	-0.08772	0.03115	0.002515	-0.11111
1	rs12083988	89.5671	16089356	A	G	-0.09246	0.0223	0.03423	0.03551	0.002516	0.12669
10	rs7911956	160.236	93365015	G	A	-0.0558	0.03402	0.1331	0.05248	0.002517	0.1889
10	rs12772391	53.4515	26883359	A	C	0.01399	0.02343	-0.1189	0.03724	0.002518	-0.13289
2	rs2254066	114.302	29889019	C	A	0.03217	0.0252	-0.1144	0.04145	0.002519	-0.14657
11	rs1044269	166.216	47487740	G	A	-0.04856	0.02783	0.1117	0.04515	0.002521	0.16026
12	rs11048521	27.6825	26593677	G	A	0.05418	0.0208	-0.06577	0.03382	0.002521	-0.11995
1	rs12568599	87.0159	24667300	A	G	-0.03796	0.02297	0.09437	0.0373	0.002521	0.13233
5	rs13185585	8.24887	5614515	A	C	-0.04588	0.0229	0.08243	0.03578	0.002523	0.12831
16	rs223862	5.55412	57483867	A	G	-0.06935	0.05509	0.252	0.09102	0.002525	0.32135
8	rs7845004	63.4371	6170683	A	G	0.03754	0.02056	-0.07993	0.03302	0.002525	-0.11747
11	rs11031688	139.624	32296109	A	G	-0.02484	0.02853	0.1363	0.04508	0.002529	0.16114
1	rs11122319	141.035	231808282	G	A	-0.03707	0.01989	0.07604	0.03174	0.002531	0.11311
8	rs16880778	57.7477	111539106	G	A	0.01247	0.04199	0.2632	0.07166	0.002537	0.25073
12	rs2283339	80.4852	12015706	A	C	0.02381	0.02483	-0.1182	0.03997	0.002538	-0.14201
5	rs1864511	86.0934	38799793	A	G	-0.03587	0.02226	0.09235	0.03618	0.002539	0.12822
5	rs4703503	81.1127	35162762	A	G	0.05435	0.02231	-0.07113	0.03508	0.002542	-0.12548
17	rs7226196	122.559	53448249	A	G	-0.02991	0.02049	0.08781	0.03319	0.002546	0.11772
19	rs10423754	69.4684	54604822	A	G	0.03249	0.01973	-0.08011	0.03168	0.002554	-0.1126
13	rs1539563	23.103	36138952	G	A	-0.05829	0.01962	0.05467	0.0319	0.002555	0.11296
3	rs6809002	203.602	80461424	A	C	-0.04573	0.02048	0.06818	0.03173	0.002556	0.11391
16	rs3915787	139.605	77808705	A	G	-0.04797	0.0203	0.06828	0.03276	0.002558	0.11625
12	rs10877183	151.327	59280828	A	G	-0.1192	0.04606	0.1334	0.06995	0.002559	0.2526
3	rs3821719	81.7	154863088	A	G	-0.03604	0.02648	0.1154	0.04265	0.00256	0.15144
1	rs10927852	124.866	16098866	A	G	-0.09073	0.02226	0.03562	0.03549	0.002561	0.12635
4	rs982887	0	122475832	G	A	0.03959	0.01958	-0.07214	0.03145	0.002561	-0.11173
10	rs2944529	46.0784	132958926	A	G	-0.003019	0.01998	-0.1165	0.03189	0.002565	-0.113481
14	rs7142232	50.0045	50847492	A	G	0.0002993	0.02027	0.1157	0.03244	0.002565	0.1154007
5	rs6898211	63.7969	140688728	A	C	-0.06798	0.05379	0.2315	0.0835	0.002569	0.29948
5	rs12658379	67.4223	106428845	A	G	-0.01603	0.01983	0.09736	0.03195	0.00257	0.11339
1	rs2810616	55.88	203982102	G	A	0.03824	0.02883	-0.1213	0.04439	0.002571	-0.15954
2	rs7597074	45.2068	66062059	G	A	0.02924	0.02809	-0.1329	0.04586	0.002572	-0.16214
4	rs10013589	120.522	42583029	G	A	-0.03466	0.02125	0.08762	0.03455	0.002574	0.12228
7	rs1880129	73.9729	39913870	G	A	0.007669	0.02109	-0.1124	0.03377	0.002575	-0.120069
3	rs17061792	5.4192	60000052	A	G	-0.001846	0.02799	0.1572	0.04474	0.002576	0.159046
18	rs11152027	189.394	55342509	A	G	0.01354	0.03435	-0.1768	0.05298	0.002577	-0.19034
19	rs10415347	13.1268	48520517	A	G	0.04186	0.02856	-0.1171	0.04434	0.002577	-0.15896
1	rs6669498	46.4218	79131805	G	A	0.06548	0.01983	-0.04729	0.03173	0.002579	-0.11277
9	rs16925492	132.137	109201514	A	G	-0.03085	0.02415	0.1092	0.03971	0.002582	0.14005
16	rs12102475	128.746	13688453	G	A	-0.04914	0.04158	0.1843	0.06537	0.002588	0.23344
16	rs12922483	42.8166	67282234	G	A	-0.02383	0.05111	0.2695	0.08287	0.002588	0.29333
8	rs6999630	51.2924	28935001	A	G	-0.01996	0.0199	0.09463	0.03242	0.002591	0.11459
11	rs1009448	194.98	33706353	G	A	0.06461	0.04124	-0.175	0.06801	0.002593	-0.23961
5	rs10036981	66.3667	150048067	G	A	0.0657	0.04779	-0.202	0.07492	0.002594	-0.2677
3	rs262993	58.9578	183476685	A	G	0.01765	0.01993	-0.09591	0.032	0.002595	-0.11356
17	rs8074248	102.56	14522101	A	G	-0.001101	0.02328	-0.1329	0.03705	0.002599	-0.131799
12	rs7131889	50.436	12460071	A	G	0.03978	0.02697	-0.1093	0.04152	0.0026	-0.14908
1	rs6680810	60.5761	34177219	A	G	-0.05658	0.02063	0.06208	0.03357	0.0026	0.11866
5	rs460881	78.3058	146034749	G	A	-0.03234	0.0284	0.1325	0.0468	0.002603	0.16484
1	rs4282783	93.5832	4190685	A	C	-0.103	0.03387	0.08846	0.05381	0.002604	0.19146
3	rs1553977	115.645	145660362	G	A	0.0198	0.02443	-0.1167	0.03821	0.002604	-0.1365
10	rs2359536	93.0726	20899608	G	A	0.01278	0.02102	-0.107	0.03379	0.002606	-0.11978
2	rs3791406	69.1472	240030484	G	A	-0.04066	0.02107	0.07851	0.03351	0.002606	0.11917
10	rs10994507	123.243	52559634	G	A	0.05093	0.03873	-0.1701	0.06237	0.00261	-0.22103
3	rs838269	99.62	189848916	A	C	0.04163	0.02773	-0.1174	0.04496	0.002611	-0.15903
11	rs11221232	57.3285	128144864	A	C	-0.09025	0.05034	0.1893	0.07803	0.002612	0.27955
17	rs4890008	113.987	78305619	A	C	0.1579	0.04893	-0.1228	0.07943	0.002618	-0.2807
16	rs17674570	134.252	11805866	G	A	-0.08874	0.03706	0.1297	0.06242	0.00262	0.21844
1	rs4384244	97.858	220068681	A	G	-0.05465	0.03773	0.1595	0.06034	0.002621	0.21415
11	rs10500833	38.4836	18638853	G	A	0.05592	0.03604	-0.1524	0.0591	0.002623	-0.20832
12	rs972183	24.1764	17692722	A	G	-0.04198	0.02072	0.07399	0.0325	0.002625	0.11597
10	rs151551	14.0207	80337464	A	C	-0.04025	0.03629	0.17	0.05975	0.002629	0.21025
15	rs11638414	143.698	101725233	C	A	-0.0432	0.02834	0.1156	0.04454	0.002629	0.1588
2	rs4234121	179.942	241769281	C	A	0.05257	0.01997	-0.05966	0.03153	0.002635	-0.11223
4	rs11936472	68.9	81653826	A	C	-0.05637	0.02972	0.1101	0.04671	0.002637	0.16647
18	rs12457275	47.6044	8912044	A	G	0.001692	0.02127	-0.1195	0.03423	0.002638	-0.121192
1	rs2301022	172.915	94372878	A	G	0.03441	0.02123	-0.08561	0.0338	0.002638	-0.12002
16	rs8060393	70.4368	77526473	G	A	-0.07568	0.05614	0.2377	0.08781	0.002643	0.31338
19	rs4805296	148.244	29378806	A	G	-0.04862	0.02003	0.06399	0.03165	0.002645	0.11261
5	rs9324766	1.11147	153531842	A	G	0.02677	0.02293	-0.1041	0.03699	0.002646	-0.13087
10	rs2397839	102.374	4769379	A	G	0.006877	0.02006	-0.1068	0.03207	0.002647	-0.113677
10	rs11258918	62.6103	14218291	G	A	-0.01992	0.02034	0.09283	0.03151	0.002649	0.11275
3	rs12485813	75.4169	85515031	G	A	-0.02588	0.0733	0.3867	0.1161	0.002655	0.41258
7	rs10276315	117.456	68037870	A	G	0.02418	0.02207	-0.1012	0.03541	0.002657	-0.12538
9	rs10821144	80.4923	96265258	A	G	-0.02066	0.01976	0.09211	0.0319	0.002657	0.11277
10	rs2583026	95.7	56108631	C	A	0.02932	0.01991	-0.08501	0.03244	0.002664	-0.11433
2	rs906864	58.646	30482099	A	G	-0.02634	0.02306	0.1025	0.03618	0.002664	0.12884
17	rs4985828	25.0499	20994235	A	C	0.04151	0.01982	-0.07119	0.03185	0.002665	-0.1127
7	rs4718480	16.2476	66671807	A	G	0.1124	0.04788	-0.1742	0.08251	0.002665	-0.2866
11	rs10831870	151.274	12623871	G	A	0.03741	0.02402	-0.09802	0.03816	0.002668	-0.13543
11	rs1118137	189.15	130890970	A	G	-0.03299	0.01965	0.07829	0.03142	0.00267	0.11128
18	rs3763494	73.5082	39848336	A	G	-0.02553	0.03105	-0.2005	0.04931	0.00267	-0.17497
6	rs2247385	101.546	33421577	G	A	-0.008118	0.01992	0.1051	0.03199	0.00267	0.113218
1	rs6693264	147.171	48556937	C	A	-0.0423	0.06448	0.3224	0.1029	0.002672	0.3647
11	rs526941	44.0128	125567539	A	C	-0.0605	0.02669	0.09291	0.04357	0.002678	0.15341
18	rs1786818	69.3742	35014046	A	G	0.04192	0.01983	-0.07081	0.03189	0.002679	-0.11273
21	rs2829764	45.9242	26834749	A	G	0.05266	0.03399	-0.1388	0.05394	0.002679	-0.19146
3	rs678058	120.09	109642716	C	A	-0.02644	0.02239	0.1009	0.03601	0.002682	0.12734
2	rs2708138	45.0443	221348373	G	A	0.04408	0.02521	-0.09592	0.03924	0.002684	-0.14
3	rs12491975	197.72	31687232	G	A	-0.07046	0.02659	0.07475	0.04041	0.002684	0.14521
6	rs6570084	171.18	136904235	G	A	-0.02894	0.02847	0.1286	0.04408	0.002684	0.15754
1	rs10924235	140.953	245697260	G	A	0.04995	0.02367	-0.08236	0.03719	0.002685	-0.13231
12	rs7296839	7.39371	80324801	A	G	-0.03865	0.05866	0.2932	0.09371	0.002687	0.33185
2	rs2570500	132.756	104481325	A	C	0.05619	0.02403	-0.07739	0.03746	0.002688	-0.13358
5	rs10071116	57.4506	159696554	G	A	0.08166	0.04596	-0.1828	0.07519	0.00269	-0.26446
7	rs6966201	110.578	42789194	A	G	-0.03193	0.02078	0.08524	0.03305	0.002691	0.11717
20	rs13043784	124.785	54075162	G	A	0.06942	0.0211	-0.04943	0.03352	0.002693	-0.11885
11	rs763583	120.704	32320110	A	G	0.06376	0.02154	-0.05801	0.0344	0.002695	-0.12177
20	rs13036740	2.61238	22724499	C	A	0.01306	0.02185	-0.1101	0.03477	0.002695	-0.12316
7	rs10487358	101.046	116790493	A	G	-0.02844	0.02548	0.1183	0.04174	0.002695	0.14674
10	rs6602713	73.938	14230235	A	C	-0.019	0.02038	0.09414	0.03173	0.002697	0.11314
1	rs7520316	67.361	205245880	A	G	-0.09509	0.08595	0.3867	0.1356	0.002698	0.48179
2	rs10204566	37.3252	58999505	G	A	-0.00498	0.01972	0.1075	0.0319	0.002701	0.11248
2	rs1192375	41.019	85008373	A	G	0.04388	0.02899	-0.124	0.04785	0.002701	-0.16788
14	rs7158255	82.5919	25922458	A	G	0.03209	0.02091	-0.08625	0.03346	0.002704	-0.11834
3	rs7614859	68.3925	80463682	A	C	-0.04454	0.02046	0.06858	0.03168	0.002707	0.11312
6	rs1209198	246.488	46017626	A	G	0.02843	0.01946	-0.0834	0.0318	0.002707	-0.11183
7	rs2190146	23.4464	10074972	A	G	-0.0781	0.03619	0.1307	0.05949	0.002709	0.2088
13	rs2576138	42.569	54679373	A	G	0.1138	0.04669	-0.1509	0.07492	0.00271	-0.2647
22	rs2858500	162.412	49681231	A	G	-0.02332	0.02005	0.08757	0.03107	0.00271	0.11089
14	rs7160686	45.021	42706983	G	A	0.04601	0.04545	-0.2087	0.07175	0.002711	-0.25471
7	rs12532327	89.4522	65535419	A	G	0.1058	0.04925	-0.1879	0.08466	0.002712	-0.2937
2	rs613166	169.415	50433751	A	G	-0.01345	0.01994	0.09934	0.03191	0.002718	0.11279
4	rs4422449	13.3178	182105473	A	C	-0.07096	0.04874	0.1992	0.0758	0.00272	0.27016
4	rs6846198	129.4	77517128	A	G	0.01112	0.01981	-0.09915	0.03101	0.002726	-0.11027
2	rs4666453	101.293	20855176	G	A	-0.003831	0.01988	0.1095	0.03216	0.002729	0.113331
8	rs393613	115.18	86990451	G	A	0.04866	0.02071	-0.06786	0.03292	0.002732	-0.11652
9	rs7022880	59.9658	76886080	A	G	0.03988	0.02079	-0.07755	0.03322	0.002732	-0.11743
13	rs9315215	55.0776	34043750	A	G	0.01454	0.01993	-0.09807	0.03187	0.002733	-0.11261
19	rs11569429	81.1605	6709074	A	G	-0.08288	0.02731	0.07944	0.04679	0.002735	0.16232
8	rs4875441	27.5809	5000769	A	G	-0.01455	0.02008	0.09964	0.03241	0.002742	0.11419
3	rs13324412	109.751	42497914	A	G	0.06698	0.03747	-0.1387	0.05754	0.002743	-0.20568
18	rs1595350	62.4909	28630904	C	A	-0.02967	0.01989	0.08293	0.03191	0.002747	0.1126
16	rs404619	99.6354	83777757	G	A	-0.003791	0.02016	0.11	0.03221	0.002748	0.113791
14	rs8005903	173.383	69746891	A	G	0.01475	0.02086	-0.1028	0.03325	0.002749	-0.11755
1	rs2477582	169.31	111748325	G	A	0.02766	0.0211	-0.09392	0.03469	0.002749	-0.12158
4	rs1033118	159.002	26032228	A	C	-0.2078	0.09422	0.3252	0.151	0.002751	0.533
22	rs5764899	31.3484	44930465	C	A	0.007898	0.01959	-0.1032	0.03151	0.002759	-0.111098
5	rs279109	55.41	100082233	G	A	-0.03966	0.02188	0.08271	0.03453	0.002759	0.12237
21	rs2838540	70.9602	45687581	A	G	-0.02081	0.02202	0.1046	0.03563	0.00276	0.12541
2	rs1013363	46.595	20863286	G	A	0.004592	0.01992	-0.1072	0.03158	0.002761	-0.111792
15	rs2573647	112.801	100473698	A	G	-0.04905	0.0251	0.09176	0.03979	0.002764	0.14081
7	rs11972231	36.22	25402437	G	A	0.006531	0.02127	-0.1138	0.03413	0.002764	-0.120331
1	rs4920502	36.922	18815334	G	A	-0.04014	0.028	0.118	0.04483	0.002766	0.15814
3	rs7615467	36.6394	100539887	A	G	0.02279	0.02882	-0.1399	0.04609	0.002768	-0.16269
4	rs12649695	65.5487	19111493	G	A	-0.04348	0.04477	0.2148	0.07379	0.002769	0.25828
8	rs17624592	65.3158	32122424	G	A	-0.06298	0.03698	0.139	0.05646	0.002769	0.20198
14	rs17104800	252.742	68420779	G	A	0.05694	0.02609	-0.09052	0.04181	0.00277	-0.14746
8	rs2028556	144.883	135648040	G	A	0.04555	0.01972	-0.06588	0.03159	0.00277	-0.11143
15	rs6576523	99.4182	23844725	A	G	0.06017	0.02464	-0.07453	0.0377	0.002778	-0.1347
1	rs11805025	71.9167	57850717	C	A	-0.001999	0.02448	0.1342	0.03838	0.002779	0.136199
2	rs11651	48.3096	216229692	G	A	-0.02783	0.02112	0.09302	0.03445	0.002784	0.12085
1	rs7513642	60.7676	205195831	A	G	0.05951	0.02501	-0.08411	0.041	0.002785	-0.14362
17	rs9895159	1.33494	12134186	A	G	-0.068	0.04371	0.1903	0.07453	0.002792	0.2583
1	rs4657277	225.181	163416975	C	A	-0.07398	0.02594	0.07185	0.04131	0.002794	0.14583
1	rs963550	142.254	205330243	A	C	0.02298	0.02179	-0.09836	0.03425	0.002798	-0.12134
2	rs6760859	25.7829	59812464	G	A	0.03789	0.0198	-0.07261	0.03122	0.002799	-0.1105
11	rs11608012	83.0539	21617059	G	A	0.02945	0.01973	-0.08214	0.0317	0.002804	-0.11159
11	rs7118193	67.7065	33202539	A	G	0.04447	0.02162	-0.07765	0.03467	0.002805	-0.12212
15	rs12902476	72.1	30004084	A	G	0.08313	0.02132	-0.0382	0.03455	0.002806	-0.12133
8	rs1825367	89.1485	77754326	A	G	0.03482	0.02014	-0.0782	0.03202	0.002808	-0.11302
5	rs10077832	52.3635	135216503	A	G	-0.1983	0.08016	0.2927	0.1435	0.002809	0.491
9	rs7868531	96.1299	1685315	G	A	0.01176	0.04127	0.2412	0.06476	0.002809	0.22944
8	rs4732976	98.07	29453239	A	G	-0.05384	0.01983	0.05807	0.03178	0.002812	0.11191
12	rs11063560	100.601	5304204	A	G	-0.0131	0.06668	0.3929	0.1184	0.002818	0.406
14	rs17103412	78.0915	66725775	A	G	0.08299	0.04295	-0.147	0.0639	0.002818	-0.22999
7	rs1388543	75.75	154216346	G	A	0.03385	0.02407	-0.103	0.039	0.002821	-0.13685
19	rs6509109	106.099	29382978	G	A	-0.04823	0.02004	0.06355	0.03162	0.002825	0.11178
19	rs4480928	144.71	20129877	C	A	0.09929	0.05947	-0.242	0.09761	0.002826	-0.34129
15	rs12912369	22.1544	70506816	G	A	-0.003913	0.02038	0.111	0.03263	0.002828	0.114913
2	rs13429746	75.2445	206812263	A	G	-0.05125	0.02402	0.08216	0.03767	0.002828	0.13341
14	rs225964	84.9313	30514667	A	G	0.04212	0.02237	-0.08491	0.03619	0.00283	-0.12703
19	rs1799258	1.87258	48977019	G	A	0.06272	0.0342	-0.1235	0.05217	0.00283	-0.18622
4	rs17064315	129.326	178041034	G	A	-0.03585	0.03241	0.1495	0.05299	0.002839	0.18535
3	rs2056123	86.9572	157570795	C	A	0.02527	0.0204	-0.09	0.0328	0.00284	-0.11527
4	rs6832586	30.8188	177334892	A	G	-0.04766	0.03475	0.1466	0.05504	0.002843	0.19426
11	rs1459892	104.111	21617550	C	A	0.02864	0.01972	-0.08309	0.03184	0.002846	-0.11173
22	rs736334	65.3281	51139178	A	G	-0.0191	0.02441	0.1205	0.03993	0.00285	0.1396
13	rs17329180	106.002	24027213	A	C	0.02052	0.02087	-0.09774	0.03371	0.002856	-0.11826
3	rs7623774	79.3221	117093435	G	A	-0.1233	0.0578	0.1978	0.09083	0.00286	0.3211
8	rs1465164	65.5215	103087322	A	G	0.02809	0.03204	-0.1519	0.05115	0.002862	-0.17999
2	rs10930151	54.5901	165972903	G	A	0.03209	0.02352	-0.09935	0.03727	0.002863	-0.13144
16	rs4784991	161.897	58898185	A	C	0.06034	0.02205	-0.06435	0.03553	0.002865	-0.12469
12	rs11613206	59.0099	40609581	A	G	-0.09726	0.04739	0.1771	0.07888	0.002866	0.27436
12	rs1108453	30.8194	9814019	G	A	0.002942	0.0282	-0.1561	0.0453	0.002868	-0.159042
5	rs10065813	142.116	152940405	A	G	-0.02953	0.03011	0.1391	0.0479	0.00287	0.16863
2	rs4148328	45.8922	234677659	A	G	-0.002242	0.02028	-0.1169	0.03267	0.002873	-0.114658
11	rs7941665	48.4596	83548648	A	C	0.02605	0.02051	-0.08931	0.03282	0.002878	-0.11536
10	rs12770855	113.176	31120198	A	G	0.0007343	0.03704	0.212	0.06044	0.002884	0.2112657
4	rs12505562	32.6348	5541650	A	G	-0.05274	0.03323	0.1354	0.05369	0.002886	0.18814
6	rs17085762	85.3103	155194880	C	A	-0.01515	0.02494	0.1225	0.03888	0.002888	0.13765
1	rs4657284	67.3991	163440717	G	A	-0.0765	0.02559	0.06538	0.04017	0.00289	0.14188
14	rs4983122	158.157	26136246	C	A	0.008727	0.02298	0.139	0.0372	0.002892	0.130273
7	rs10277160	105.212	77675129	G	A	-0.0451	0.01982	0.06567	0.03146	0.002893	0.11077
6	rs9348682	150.015	9305544	G	A	0.04328	0.01985	-0.06772	0.03154	0.002895	-0.111
22	rs2688098	155.778	49682956	G	A	-0.02358	0.02012	0.08644	0.03098	0.002896	0.11002
18	rs8182392	101.973	35027184	G	A	-0.04552	0.02155	0.07467	0.03412	0.002898	0.12019
11	rs666165	55.4457	48457439	G	A	-0.02102	0.02407	0.1182	0.04009	0.002899	0.13922
11	rs7101919	137.945	5510688	G	A	-0.004194	0.02099	0.1141	0.03372	0.002899	0.118294
4	rs580091	270.656	172750974	A	G	-0.03486	0.01994	0.07744	0.032	0.002899	0.1123
18	rs170286	169.713	55067109	A	G	0.06073	0.03202	-0.1182	0.05086	0.002901	-0.17893
16	rs12918421	47.3242	83165027	A	G	-0.0006865	0.02121	-0.1203	0.03411	0.002903	-0.1196135
1	rs1556017	57.39	198315934	G	A	-0.05412	0.03019	0.1121	0.04694	0.002903	0.16622
9	rs13287066	74.8437	96178967	A	G	-0.03157	0.02001	0.08128	0.03218	0.002904	0.11285
6	rs9394963	57.0514	43719391	A	C	0.01792	0.02047	-0.09761	0.03296	0.002905	-0.11553
10	rs12413892	191.755	126236581	G	A	-0.03687	0.02127	0.08283	0.03411	0.002906	0.1197
16	rs2716566	156.609	74027248	A	G	-0.02488	0.02031	0.08977	0.03273	0.002915	0.11465
13	rs3858749	9.46163	22008438	G	A	0.02673	0.02091	-0.09376	0.03466	0.002918	-0.12049
6	rs11969769	35.2279	39874875	A	C	-0.1303	0.08273	0.3369	0.1334	0.002918	0.4672
8	rs13255589	102.563	5408130	A	C	0.02561	0.02086	-0.09028	0.03289	0.002919	-0.11589
6	rs1202309	76.0593	19919986	A	G	0.0523	0.0218	-0.0707	0.03512	0.002926	-0.123
9	rs10117696	146.609	20533643	G	A	0.04725	0.02024	-0.06547	0.03203	0.002929	-0.11272
6	rs9351817	51.9331	72203005	A	G	-0.05564	0.01997	0.05711	0.03221	0.002933	0.11275
5	rs11133999	215.87	3643741	G	A	-0.02305	0.02014	0.09	0.03224	0.002935	0.11305
10	rs7893773	114.38	52916173	A	G	0.007945	0.0199	-0.1022	0.03125	0.002936	-0.110145
2	rs971651	57.0815	120498760	G	A	0.05385	0.02137	-0.06966	0.0356	0.002936	-0.12351
3	rs13061181	53.1515	190519325	C	A	-0.04038	0.0319	0.1367	0.05026	0.002936	0.17708
6	rs9472812	53.9775	46612653	G	A	-0.08611	0.04145	0.1504	0.06786	0.002937	0.23651
7	rs12699065	114.24	71196604	A	G	-0.07542	0.02506	0.06665	0.04069	0.002947	0.14207
5	rs10071377	175.423	159696951	G	A	0.08463	0.04592	-0.1777	0.07533	0.002948	-0.26233
5	rs887343	118.291	149548823	A	G	0.02972	0.02126	-0.08984	0.03414	0.00295	-0.11956
12	rs4762060	187.622	52574780	A	G	-0.01305	0.02076	0.1032	0.03315	0.002951	0.11625
1	rs4658132	71.3294	89799068	A	C	0.04348	0.01985	-0.06722	0.03151	0.002952	-0.1107
9	rs1332488	9.66407	16207279	G	A	0.06354	0.03346	-0.1288	0.0554	0.002952	-0.19234
7	rs7788320	201.5	116660803	A	G	0.04477	0.02024	-0.06923	0.03258	0.002955	-0.114
13	rs7318611	91.9826	81143590	A	G	-0.05208	0.03891	0.1798	0.06761	0.002956	0.23188
3	rs13079048	5.68896	190514985	G	A	-0.04027	0.03191	0.1367	0.05026	0.002956	0.17697
13	rs7490083	52.69	114585454	A	G	-0.02916	0.02073	0.08747	0.03332	0.002959	0.11663
1	rs17120526	130.856	99951627	A	G	0.1443	0.04067	-0.08019	0.06365	0.00296	-0.22449
5	rs11133943	210.105	246152	G	A	-0.02469	0.02283	0.1039	0.03677	0.002961	0.12859
17	rs410157	149.294	598240	A	G	-0.03125	0.02053	0.08522	0.03339	0.002963	0.11647
22	rs5758064	57.0519	41153879	G	A	-0.03324	0.01981	0.0784	0.03193	0.002963	0.11164
5	rs11956256	140.148	177875446	A	C	-0.06564	0.02899	0.09713	0.04647	0.002963	0.16277
16	rs9933247	119.11	86799674	A	G	-0.2172	0.05065	0.0625	0.07936	0.002966	0.2797
10	rs10795269	94.6297	5421135	G	A	-0.01022	0.02005	0.1041	0.03282	0.002967	0.11432
3	rs326305	126.056	96152471	G	A	0.02146	0.02055	-0.09402	0.033	0.002972	-0.11548
3	rs7652006	29.9562	122377999	A	G	0.03236	0.03076	-0.1364	0.04777	0.002972	-0.16876
12	rs861070	105.891	126005488	G	A	0.0267	0.02035	-0.08499	0.03162	0.002973	-0.11169
5	rs10038115	0.664832	150044701	G	A	0.06131	0.04778	-0.2027	0.07494	0.002974	-0.26401
14	rs17126012	61.3025	53467860	A	C	0.0686	0.03344	-0.1173	0.05293	0.002986	-0.1859
3	rs16835749	51.0549	124348999	A	G	-0.02365	0.02054	0.09455	0.0341	0.002986	0.1182
8	rs2517124	168.327	17333462	A	G	-0.05748	0.03112	0.1313	0.05545	0.002986	0.18878
1	rs12022530	77.5	94175909	G	A	0.01648	0.01966	-0.09295	0.03117	0.002989	-0.10943
4	rs2723298	125.868	111608485	A	G	0.05112	0.02255	-0.07733	0.03693	0.00299	-0.12845
12	rs10848359	28.9058	131836281	A	G	-0.02124	0.01968	0.09007	0.03193	0.002998	0.11131
6	rs287810	87.5736	83416600	G	A	0.04158	0.02101	-0.07762	0.03423	0.002998	-0.1192
10	rs10904450	62.39	588406	G	A	0.1036	0.02854	-0.05515	0.04524	0.003002	-0.15875
10	rs6602354	24.082	6012301	A	G	-0.05247	0.06179	0.2759	0.09178	0.003002	0.32837
11	rs353587	43.24	35122661	A	G	-0.0241	0.0203	0.09085	0.03299	0.003005	0.11495
12	rs974453	109.725	20889942	A	G	-0.06818	0.03592	0.1335	0.0577	0.003005	0.20168
4	rs6830905	119.438	38443544	A	G	-0.07542	0.04486	0.1802	0.07356	0.003005	0.25562
4	rs2309692	85.1148	183454812	A	G	-0.02347	0.02778	0.1316	0.04428	0.003008	0.15507
5	rs3096089	156.055	145978224	A	G	-0.03111	0.02137	0.08935	0.03453	0.003013	0.12046
5	rs1946758	149.66	30659568	A	G	-0.01863	0.04089	0.214	0.06695	0.003016	0.23263
12	rs10841528	148.332	20597486	G	A	-0.0361	0.01992	0.07621	0.03221	0.003023	0.11231
1	rs17496172	64.5177	67302410	A	G	-0.06627	0.03577	0.131	0.05612	0.003028	0.19727
3	rs16832027	176.533	180523951	A	C	0.128	0.04397	-0.1351	0.07706	0.003028	-0.2631
5	rs7722813	135.724	142951947	A	C	0.02202	0.02223	-0.103	0.03582	0.00303	-0.12502
2	rs1401841	78.0012	76654561	A	G	0.008668	0.0196	-0.1008	0.03128	0.003033	-0.109468
19	rs17271272	173.609	46543566	A	G	-0.04304	0.02758	0.1068	0.04237	0.003034	0.14984
7	rs4728198	93.4013	130399691	A	G	0.04106	0.02891	-0.1245	0.0478	0.003039	-0.16556
4	rs1503535	124.361	120898509	G	A	-0.04137	0.02059	0.07412	0.03309	0.003043	0.11549
5	rs6875836	187.082	31206701	G	A	0.0657	0.04219	-0.1704	0.06757	0.003043	-0.2361
1	rs947103	140.615	245766651	A	G	-0.03397	0.02003	0.07763	0.0319	0.003044	0.1116
2	rs6728724	76.0968	7598525	A	G	-0.03601	0.02096	0.08127	0.03357	0.003044	0.11728
16	rs9921430	88.1383	13694048	G	A	-0.0481	0.04084	0.1777	0.06433	0.003046	0.2258
11	rs1939029	61.927	101653644	A	G	-0.03465	0.01983	0.07655	0.03186	0.003047	0.1112
5	rs7731125	127.286	112428869	A	G	-0.02995	0.05946	0.3013	0.09467	0.003047	0.33125
6	rs945131	68.9206	43715994	G	A	0.01571	0.01962	-0.09396	0.03139	0.003048	-0.10967
17	rs12937378	113.59	14522841	G	A	-0.001197	0.02328	-0.1308	0.03703	0.00305	-0.129603
10	rs1904696	27.8198	52911474	A	G	-0.003692	0.02003	-0.1145	0.03161	0.003051	-0.110808
6	rs13202030	56.4188	163768368	G	A	-0.02418	0.02123	0.09369	0.03365	0.003051	0.11787
1	rs10754199	72.3169	196670839	A	G	-0.02103	0.02052	0.09552	0.03357	0.003052	0.11655
19	rs414402	150.169	44492568	G	A	-0.0001512	0.02209	0.1233	0.03534	0.003057	0.1234512
6	rs311684	242.637	74126084	G	A	-0.06967	0.01976	0.04139	0.03187	0.003059	0.11106
19	rs12985572	184.28	28769462	C	A	-0.04001	0.02124	0.07969	0.03438	0.00306	0.1197
10	rs10823356	170.209	71146874	A	G	-0.03933	0.02012	0.07467	0.03281	0.003061	0.114
10	rs531790	147.597	115129261	G	A	0.04968	0.03093	-0.1262	0.05072	0.003061	-0.17588
5	rs12522553	88.4514	5601744	A	G	-0.0355	0.02217	0.08671	0.03481	0.003061	0.12221
6	rs362871	128.911	146672103	A	G	0.01388	0.02002	-0.09684	0.03158	0.003062	-0.11072
13	rs9533817	56.653	44884745	G	A	0.02492	0.02007	-0.08729	0.03214	0.003066	-0.11221
13	rs9555306	45.5157	107635040	A	G	0.02346	0.02027	-0.08849	0.03191	0.003066	-0.11195
9	rs880242	146.67	132629832	G	A	0.03414	0.01991	-0.07809	0.03226	0.003071	-0.11223
4	rs11736419	9.09312	56677652	A	G	0.0419	0.02287	-0.08501	0.03626	0.003074	-0.12691
3	rs12489521	28.0971	30384065	A	G	-0.02851	0.02405	0.1067	0.03883	0.003076	0.13521
12	rs10859481	85.77	93706256	A	G	-0.05038	0.01972	0.06138	0.0322	0.003077	0.11176
3	rs13062230	118.913	190515906	G	A	-0.0385	0.03196	0.1382	0.05042	0.003078	0.1767
3	rs9869035	152.152	136938031	G	A	-0.02343	0.02027	0.0899	0.03249	0.003079	0.11333
8	rs13273027	232.061	3502719	G	A	0.04004	0.02015	-0.07197	0.03204	0.00308	-0.11201
13	rs9317446	93.3403	65428142	A	C	-0.02447	0.02	0.08893	0.03268	0.003081	0.1134
14	rs2693694	258.772	99679775	G	A	-0.02848	0.02236	0.09493	0.0352	0.003083	0.12341
1	rs1329424	153.889	196646176	A	C	-0.0212	0.02038	0.09386	0.03311	0.003083	0.11506
9	rs7469786	146.653	82558699	A	G	0.05939	0.06168	-0.2697	0.09257	0.003089	-0.32909
6	rs453590	54.21	33403422	A	G	-0.006792	0.01993	0.1047	0.03198	0.003094	0.111492
3	rs11923504	59.9914	65638248	A	G	0.07231	0.02642	-0.07938	0.04395	0.003096	-0.15169
4	rs13120833	40.75	77471116	A	G	-0.02961	0.01994	0.08014	0.03131	0.003108	0.10975
11	rs652689	59.13	56608758	G	A	-0.0438	0.02376	0.08906	0.03814	0.003109	0.13286
1	rs4454493	174.969	80567175	A	G	-0.01181	0.02494	-0.1495	0.03933	0.003113	-0.13769
3	rs11711637	81.2717	148550827	G	A	0.05256	0.02243	-0.07191	0.03563	0.003113	-0.12447
1	rs4653935	50.8471	228474817	A	G	-0.06634	0.02636	0.0793	0.04162	0.003115	0.14564
19	rs6510612	45.3487	1517292	G	A	0.02634	0.02106	-0.0914	0.03381	0.003116	-0.11774
3	rs492748	30.2286	172394890	G	A	-0.01411	0.02115	0.1052	0.03436	0.003116	0.11931
4	rs1476086	113.539	108593062	A	G	0.02254	0.01984	-0.08765	0.03156	0.003116	-0.11019
7	rs12536818	35.5423	65969602	A	G	0.1146	0.04946	-0.1766	0.08519	0.003117	-0.2912
13	rs17054332	42.2339	37261530	G	A	-0.08952	0.0431	0.1624	0.07353	0.003119	0.25192
17	rs4795430	56.206	26700470	A	G	-0.07293	0.03981	0.1499	0.06403	0.003119	0.22283
15	rs17703883	26.6334	51530097	G	A	0.06548	0.02262	-0.06214	0.03678	0.00312	-0.12762
12	rs2277323	91.2146	58009372	A	G	0.02086	0.02301	-0.1057	0.03615	0.003128	-0.12656
18	rs2846834	86.1975	871268	A	G	-0.0398	0.02426	0.09686	0.03938	0.003128	0.13666
7	rs17570297	70.572	68385861	C	A	0.05052	0.02093	-0.06645	0.0336	0.00313	-0.11697
11	rs7389	178.073	118528466	C	A	-0.06767	0.02152	0.05031	0.03364	0.003132	0.11798
16	rs16944061	55.579	77529953	A	G	-0.06984	0.05588	0.2377	0.08781	0.003134	0.30754
16	rs4075601	166.117	86929282	G	A	0.01446	0.02922	-0.1492	0.04708	0.003134	-0.16366
11	rs7118159	104.872	46160551	A	G	0.03291	0.01948	-0.07648	0.03149	0.003137	-0.10939
19	rs17639568	148.907	13157540	A	G	0.04599	0.02162	-0.07699	0.03559	0.003141	-0.12298
21	rs2830110	144.404	27571925	C	A	-0.0483	0.02031	0.06439	0.0323	0.003144	0.11269
6	rs311683	87.7225	74126941	G	A	-0.07005	0.01972	0.04064	0.03188	0.003149	0.11069
12	rs328733	214.89	72197574	G	A	-0.0427	0.03153	0.1285	0.04864	0.003151	0.1712
9	rs10491794	91.1341	82168805	A	C	0.03245	0.0222	-0.08981	0.03495	0.003151	-0.12226
1	rs12131286	117.317	77697582	G	A	0.01932	0.02052	-0.09362	0.03228	0.003154	-0.11294
13	rs626904	255.836	39984946	A	G	-0.06404	0.02109	0.05299	0.03357	0.003155	0.11703
10	rs6481273	69.1	52226886	A	G	0.05976	0.03594	-0.1365	0.05594	0.003158	-0.19626
8	rs17089732	90.9757	23777081	C	A	-0.2311	0.09299	0.395	0.1906	0.003158	0.6261
10	rs11187076	43.9396	94336963	G	A	-0.04206	0.02001	0.06732	0.03119	0.00316	0.10938
11	rs2340324	19.3228	5413551	G	A	-0.05176	0.02499	0.08934	0.04075	0.003161	0.1411
13	rs576105	92.7478	32040778	A	C	0.07809	0.02928	-0.08289	0.04603	0.003166	-0.16098
17	rs9911319	26.9587	5415623	A	G	0.0112	0.01997	-0.1002	0.03203	0.00317	-0.1114
11	rs5024042	19.281	5373562	A	C	-0.002541	0.02198	-0.127	0.03602	0.003171	-0.124459
17	rs5862	127.289	5402957	G	A	0.02542	0.01991	-0.08538	0.03184	0.003171	-0.1108
1	rs12026840	151.845	112617049	A	G	-0.05372	0.02842	0.1054	0.04584	0.003171	0.15912
11	rs4237648	55.4015	44732574	A	G	-0.01115	0.02464	0.1301	0.04104	0.003172	0.14125
14	rs12433887	0	53322999	G	A	0.01502	0.02165	-0.1054	0.03461	0.003172	-0.12042
21	rs2832917	76.1103	31872319	A	G	0.0465	0.01992	-0.06505	0.03213	0.003174	-0.11155
4	rs10005243	8.4132	185845735	G	A	0.008907	0.02012	-0.1039	0.03253	0.003175	-0.112807
15	rs234505	54.1557	97583046	A	G	-0.08513	0.05656	0.2253	0.08872	0.003176	0.31043
4	rs17005004	52.1178	81842668	G	A	-0.03174	0.03363	0.1604	0.0558	0.003179	0.19214
6	rs3823118	193.529	73883238	A	G	-0.09619	0.03711	0.1199	0.06314	0.003179	0.21609
1	rs6541281	55.41	231813134	A	G	0.03995	0.01987	-0.06868	0.03101	0.00318	-0.10863
9	rs2927567	37.6135	96096243	C	A	-0.02753	0.01956	0.08349	0.03215	0.00318	0.11102
3	rs12485376	58.6253	188381903	A	G	-0.02504	0.01972	0.08652	0.03228	0.003183	0.11156
19	rs4804554	153.895	11083210	A	C	-0.05553	0.02288	0.07232	0.03682	0.003185	0.12785
22	rs9628588	26.3642	49059082	A	G	-0.03198	0.02299	0.09551	0.03662	0.003189	0.12749
4	rs1488299	98.6884	27261443	A	G	-0.03717	0.01993	0.07314	0.03166	0.00319	0.11031
1	rs12068202	68.0444	7961294	G	A	-0.05837	0.07324	0.3363	0.112	0.003192	0.39467
4	rs536002	30.8321	57134800	G	A	0.05871	0.02186	-0.06334	0.03515	0.003192	-0.12205
17	rs2278637	7.89641	8062102	C	A	-0.02769	0.02161	0.09099	0.03396	0.003194	0.11868
3	rs17827807	47.497	36008561	G	A	-0.09215	0.03453	0.09738	0.05422	0.003196	0.18953
8	rs10503225	79.5927	3813731	G	A	0.0415	0.03036	-0.1284	0.049	0.003196	-0.1699
6	rs1864750	113.59	36704807	G	A	-0.02264	0.02315	-0.1528	0.03759	0.003201	-0.13016
14	rs10138279	66.3693	43064028	G	A	-0.04727	0.03643	0.1589	0.05973	0.003204	0.20617
14	rs1275749	53.3872	70138937	A	G	0.05388	0.04591	-0.2046	0.07471	0.003204	-0.25848
11	rs10768907	73.02	5411580	A	G	-0.05122	0.02499	0.08974	0.04078	0.003205	0.14096
5	rs10213971	87.1461	27532751	A	C	-0.04354	0.02084	0.0713	0.03292	0.003205	0.11484
17	rs4790348	77.3775	2553836	A	G	-0.03824	0.04424	0.2236	0.07704	0.003211	0.26184
12	rs10879304	74.6289	71974843	A	G	-0.08689	0.03656	0.1144	0.0577	0.003212	0.20129
11	rs10791599	56.26	102760015	G	A	-0.04599	0.02055	0.06928	0.03329	0.003216	0.11527
1	rs1864346	167.245	158736445	A	G	0.01766	0.02086	-0.1004	0.03421	0.003217	-0.11806
12	rs7307294	72.0582	43119592	A	G	0.01039	0.03307	-0.1727	0.05262	0.003219	-0.18309
1	rs10914894	127.128	34734066	A	G	0.007158	0.01971	-0.1035	0.032	0.003221	-0.110658
20	rs4815670	33.5454	4216864	A	G	-0.05858	0.01981	0.05139	0.03164	0.003222	0.10997
2	rs4673991	87.8532	216212089	A	G	-0.027	0.02115	0.09223	0.03451	0.003227	0.11923
1	rs2273166	170.057	94341137	A	G	-0.04438	0.02007	0.06753	0.03227	0.003229	0.11191
16	rs903880	51.9235	16130514	A	C	-0.04622	0.02383	0.08496	0.03763	0.003231	0.13118
1	rs1353341	196.391	4372992	A	G	0.02865	0.04102	-0.1867	0.06055	0.003232	-0.21535
5	rs10434776	137.785	125310154	A	C	0.0547	0.06359	-0.2747	0.09202	0.003232	-0.3294
12	rs10774922	127.072	117880281	G	A	0.05951	0.01973	-0.05118	0.03199	0.003234	-0.11069
8	rs16938710	53.4435	74550628	C	A	0.03344	0.02411	-0.09937	0.03813	0.003236	-0.13281
11	rs2252648	64.019	120415557	C	A	0.03127	0.02167	-0.0895	0.03483	0.00324	-0.12077
9	rs10116422	77.8983	96357739	C	A	-0.0303	0.02045	0.0842	0.03308	0.00324	0.1145
20	rs11696501	0	44124523	G	A	0.05597	0.02487	-0.08196	0.03971	0.003242	-0.13793
2	rs2252087	66.3038	5876302	A	C	0.01467	0.02187	-0.1085	0.03568	0.003242	-0.12317
16	rs13338647	271.25	83157302	G	A	-0.01138	0.02022	-0.1232	0.03216	0.003244	-0.11182
1	rs6428989	125.35	237248703	A	G	-0.004676	0.04928	0.2673	0.07816	0.003244	0.271976
5	rs3776170	173.645	100210995	G	A	-0.04846	0.02029	0.06233	0.0317	0.003246	0.11079
13	rs9578183	11.2921	31107818	G	A	0.06728	0.02299	-0.0591	0.03627	0.003248	-0.12638
16	rs12447971	60.8245	7538601	A	G	0.02956	0.01977	-0.08136	0.03208	0.003248	-0.11092
14	rs2273913	75.4859	24617238	A	G	0.004022	0.02432	-0.13	0.03851	0.003249	-0.134022
14	rs11159287	91.1258	25890366	G	A	0.06543	0.03505	-0.1268	0.05514	0.00325	-0.19223
7	rs10240008	187.973	1331920	C	A	0.01356	0.02	0.1248	0.03209	0.00325	0.11124
1	rs7547365	0	80377618	A	C	-0.05307	0.03347	0.1318	0.05314	0.003251	0.18487
2	rs16987069	141.635	19971625	A	G	0.01147	0.06417	0.3909	0.1118	0.003251	0.37943
16	rs11646521	124.773	58884175	G	A	0.05853	0.02202	-0.06459	0.03558	0.003256	-0.12312
5	rs4590196	117.32	95997285	A	C	0.03689	0.02387	-0.09495	0.03792	0.003256	-0.13184
12	rs4913384	89.32	68362819	A	G	-0.04681	0.04486	0.2002	0.07097	0.003261	0.24701
16	rs7205804	133.51	57004889	A	G	0.006742	0.01996	-0.1029	0.03149	0.003266	-0.109642
1	rs10923142	128.499	116204661	A	G	0.06971	0.02596	-0.07657	0.04242	0.003266	-0.14628
1	rs17110749	158.219	55048190	A	G	0.1255	0.04577	-0.1274	0.0728	0.003266	-0.2529
3	rs13059541	8.10728	117465114	A	G	-0.03492	0.02814	0.1206	0.04475	0.003266	0.15552
3	rs16857741	139.014	145732933	A	G	-0.009166	0.02092	0.1055	0.03288	0.003266	0.114666
13	rs12858133	75.3694	51051374	A	G	-0.02046	0.03273	0.161	0.05231	0.003268	0.18146
16	rs7188833	34.3242	83414018	G	A	0.03124	0.02206	-0.09107	0.03525	0.003271	-0.12231
17	rs4792538	66.5611	14575589	A	G	0.02488	0.03006	-0.1445	0.04913	0.003271	-0.16938
15	rs698455	109.943	37229316	C	A	0.03976	0.02251	-0.08585	0.0363	0.003272	-0.12561
1	rs10917052	71.762	22154987	A	G	0.03186	0.02167	-0.08734	0.03425	0.003273	-0.1192
10	rs11598219	253.389	69900240	G	A	-0.02081	0.01973	0.09129	0.03262	0.003275	0.1121
20	rs2327206	44.98	9881109	G	A	-0.04022	0.02926	0.1256	0.04819	0.003275	0.16582
16	rs11075440	15.81	61883401	C	A	0.01822	0.02658	-0.1289	0.04241	0.003276	-0.14712
16	rs11639762	35.4651	83417177	A	G	0.06214	0.02675	-0.08639	0.04284	0.003278	-0.14853
1	rs1061147	111.956	196654324	A	C	-0.02117	0.02039	0.09319	0.03312	0.003278	0.11436
7	rs1167795	2.7582	75173135	A	G	-0.04846	0.01967	0.06032	0.03133	0.003278	0.10878
6	rs1321820	107.862	24420113	G	A	-0.009357	0.0226	0.1149	0.03574	0.003287	0.124257
9	rs6475120	8.57691	1732880	A	G	0.03718	0.01978	-0.07191	0.0314	0.003288	-0.10909
6	rs311685	37.373	74125888	A	G	-0.07039	0.01973	0.03972	0.03185	0.003296	0.11011
6	rs311686	28.0429	74125875	A	G	-0.07039	0.01973	0.03972	0.03185	0.003296	0.11011
8	rs12708003	30.8919	61151150	C	A	-0.03731	0.02095	0.07705	0.0328	0.003299	0.11436
5	rs3776019	164.878	130850938	G	A	-0.02588	0.02554	0.1186	0.04204	0.003301	0.14448
9	rs1396634	36.3739	1094973	G	A	-0.01988	0.02203	0.1024	0.0353	0.003302	0.12228
9	rs7872945	107.224	120162325	A	G	-0.02108	0.02012	0.08851	0.03141	0.003302	0.10959
8	rs7816300	185.898	109787856	A	G	-0.02468	0.02135	0.09327	0.034	0.003303	0.11795
11	rs12419834	65.5935	35941082	A	C	0.03247	0.02401	-0.1025	0.03916	0.003306	-0.13497
13	rs3803261	17.5993	53613081	G	A	0.07157	0.02877	-0.08967	0.04674	0.003306	-0.16124
20	rs1028539	118.094	16445463	A	G	0.02919	0.02411	-0.1053	0.03893	0.003307	-0.13449
3	rs11921615	87.8349	25454666	G	A	-0.06216	0.03504	0.1366	0.0579	0.003309	0.19876
10	rs1247278	34.4885	120706950	G	A	-0.008694	0.03206	0.1786	0.05511	0.00331	0.187294
19	rs11878377	3.92928	10965270	A	G	-0.05524	0.02165	0.06311	0.03398	0.003313	0.11835
17	rs7225029	108.092	78297779	A	G	0.1277	0.03953	-0.09505	0.06471	0.003314	-0.22275
2	rs13021967	84.5142	77780227	A	G	0.04187	0.032	-0.1347	0.05092	0.003317	-0.17657
7	rs7807514	54.1723	91017896	G	A	-0.02334	0.01986	0.08766	0.03216	0.003317	0.111
4	rs10016992	27.1882	127378114	G	A	-0.04332	0.02217	0.07853	0.03507	0.003318	0.12185
1	rs10801553	47.2659	196655743	A	C	-0.02061	0.02039	0.09364	0.03314	0.003319	0.11425
11	rs1498469	54.4006	5411239	A	G	-0.051	0.02498	0.08934	0.04075	0.003324	0.14034
6	rs3963	132.11	55204017	A	G	0.0476	0.02081	-0.0679	0.03339	0.003329	-0.1155
11	rs11606499	38.6949	56409603	A	G	-0.05326	0.02866	0.1055	0.04585	0.00333	0.15876
20	rs2003017	49.9037	5716015	A	G	-0.06705	0.03236	0.1132	0.05219	0.00333	0.18025
2	rs6717256	28.9575	77772143	G	A	-0.03528	0.02798	0.1226	0.04593	0.003331	0.15788
4	rs4691215	66.55	166606890	G	A	0.007718	0.02029	0.1192	0.0321	0.003331	0.111482
4	rs10012732	119.596	30005434	A	G	-0.04865	0.0226	0.07849	0.03696	0.003338	0.12714
12	rs470894	85.2794	129440055	A	G	-0.008058	0.03198	0.1695	0.05136	0.003339	0.177558
12	rs7953943	9.10212	94430328	G	A	0.02487	0.02394	-0.1077	0.0383	0.003343	-0.13257
5	rs13167049	33.6759	27308663	A	G	-0.07631	0.03047	0.08939	0.04755	0.003345	0.1657
12	rs7959985	25.8332	95729526	A	G	-0.005145	0.01999	0.1058	0.03209	0.003346	0.110945
2	rs2116026	265.808	128310381	A	C	-0.007826	0.0275	0.1476	0.04529	0.003347	0.155426
10	rs1750737	75.5205	11155332	G	A	-0.02174	0.03412	0.1605	0.05189	0.003348	0.18224
5	rs255257	145.421	67964088	A	G	-0.03284	0.02574	0.1108	0.04166	0.003348	0.14364
11	rs2077173	159.827	118492591	A	G	-0.06686	0.02152	0.0503	0.03364	0.003349	0.11716
5	rs7704485	16.345	173232541	A	G	-0.01643	0.02665	0.1327	0.04328	0.003349	0.14913
6	rs1326156	41.1297	125181691	C	A	-0.01732	0.02016	0.09701	0.03335	0.003351	0.11433
11	rs4757536	100.767	17515143	G	A	0.04223	0.02989	-0.1242	0.04824	0.003353	-0.16643
17	rs3182380	154.138	26519204	A	G	-0.06108	0.0399	0.1604	0.06411	0.003353	0.22148
2	rs9308704	58.9848	115627410	A	G	0.02912	0.0197	-0.0808	0.03188	0.003354	-0.10992
20	rs8123267	7.69332	14169136	G	A	-0.01965	0.04422	0.227	0.07154	0.003356	0.24665
4	rs6833755	143.269	122030864	G	A	0.05574	0.02517	-0.08481	0.04078	0.003356	-0.14055
20	rs7262725	142.653	22711424	A	G	0.0127	0.02184	-0.1078	0.03478	0.003359	-0.1205
2	rs6546952	54.8439	75301763	G	A	0.02632	0.01978	-0.08308	0.03162	0.003359	-0.1094
9	rs1604856	41.4312	73909625	G	A	-0.04037	0.0268	0.1053	0.04183	0.003362	0.14567
1	rs266825	76.5339	167251016	G	A	0.0747	0.03761	-0.1398	0.06277	0.003368	-0.2145
2	rs1124200	81.9161	1778558	G	A	0.05265	0.02235	-0.07095	0.03574	0.003368	-0.1236
10	rs17133974	174.586	5075366	G	A	0.05158	0.0265	-0.093	0.04159	0.00337	-0.14458
11	rs12277767	57.5964	12624678	G	A	0.03588	0.02401	-0.09652	0.03825	0.00337	-0.1324
11	rs12804345	37.5405	115156628	A	C	-0.06849	0.02572	0.07346	0.04102	0.003371	0.14195
5	rs2173525	44.3055	52070084	C	A	-0.1677	0.07705	0.2708	0.1282	0.003371	0.4385
14	rs11623355	49.0265	68510317	G	A	0.05729	0.02678	-0.09124	0.04301	0.003372	-0.14853
14	rs150786	0	79360094	A	G	-0.0463	0.02331	0.08224	0.03714	0.003372	0.12854
20	rs6094888	205.828	46483476	G	A	-0.1171	0.0436	0.1386	0.07553	0.003372	0.2557
7	rs6944414	115.007	71152622	A	G	-0.04696	0.02115	0.06996	0.03381	0.003372	0.11692
3	rs4568101	71.4809	24951858	A	C	0.03015	0.02106	-0.08555	0.03338	0.003373	-0.1157
11	rs10839598	201.967	6729493	A	C	0.06242	0.02004	-0.0497	0.03258	0.003376	-0.11212
12	rs4408387	23.7826	14261873	A	G	0.0053	0.02354	-0.1256	0.03794	0.003378	-0.1309
12	rs2362411	103.524	94388945	A	G	0.008646	0.02081	-0.1064	0.03327	0.003379	-0.115046
4	rs16890501	101.562	14453452	G	A	-0.04572	0.0225	0.0797	0.0364	0.003379	0.12542
22	rs2111400	41.4989	47143853	A	G	0.1228	0.05236	-0.1569	0.07984	0.003386	-0.2797
5	rs1054174	148.874	204952	A	G	-0.01824	0.02296	0.1093	0.03697	0.003386	0.12754
2	rs12692662	67.5735	163815994	C	A	-0.04464	0.02724	0.1069	0.04395	0.003387	0.15154
1	rs34645579	128.07	14972976	A	G	0.01867	0.02395	-0.1149	0.03877	0.003388	-0.13357
12	rs12310799	22.2495	72181306	G	A	-0.06302	0.02898	0.09486	0.04543	0.00339	0.15788
1	rs12121718	106.147	216205110	A	G	0.06238	0.02422	-0.06953	0.03795	0.00339	-0.13191
11	rs12796185	175.848	120446830	G	A	0.044	0.02131	-0.07362	0.03403	0.003392	-0.11762
3	rs6773772	96.905	31851726	G	A	-0.03372	0.02139	0.08396	0.034	0.003392	0.11768
12	rs972862	10.5891	94428108	G	A	0.02406	0.02395	-0.1083	0.0383	0.003395	-0.13236
18	rs642510	29.4671	8856633	A	C	-0.009793	0.02064	0.1035	0.03272	0.003395	0.113293
1	rs12041975	231.818	94336935	A	G	-0.04438	0.02007	0.06696	0.03228	0.003396	0.11134
2	rs7574579	44.98	98814054	G	A	-0.04323	0.0211	0.07463	0.03426	0.0034	0.11786
10	rs11010743	108	36919907	A	G	-0.09534	0.0376	0.1169	0.06193	0.003401	0.21224
20	rs444594	63.4367	14466618	A	G	0.03442	0.02763	-0.1127	0.04195	0.003404	-0.14712
4	rs1385890	121.038	81535393	G	A	-0.04701	0.0236	0.08307	0.03762	0.003405	0.13008
12	rs4767134	106.159	114256945	A	G	-0.03129	0.02739	0.1201	0.04384	0.003406	0.15139
18	rs17736134	24.63	70665806	G	A	-0.1161	0.07838	0.3098	0.1225	0.003406	0.4259
12	rs7963083	14.9088	77067412	G	A	0.06973	0.02492	-0.06965	0.04055	0.003408	-0.13938
7	rs2285444	111.742	88426836	A	G	0.1416	0.06457	-0.2016	0.09782	0.003408	-0.3432
5	rs7709237	89.6334	91942698	G	A	-0.03441	0.02171	0.08636	0.03507	0.00341	0.12077
19	rs1688021	32.2685	35608148	A	G	0.01375	0.02	-0.09544	0.03149	0.003423	-0.10919
21	rs2826694	52.4527	22512344	G	A	0.05096	0.02121	-0.06551	0.03367	0.003423	-0.11647
11	rs2199234	79.6404	21616465	G	A	0.02937	0.01973	-0.0799	0.03169	0.003424	-0.10927
4	rs17366966	106.842	94994695	G	A	-0.07028	0.03292	0.1178	0.0552	0.003424	0.18808
5	rs10805563	77.0026	31229741	C	A	-0.07354	0.03236	0.1109	0.05409	0.003424	0.18444
1	rs12035199	8.50145	120062933	A	G	0.01565	0.02258	-0.1111	0.03697	0.003425	-0.12675
3	rs717463	140.941	59372700	G	A	-0.03598	0.02762	0.119	0.0452	0.003426	0.15498
14	rs10498647	67.3579	96381342	A	G	0.2595	0.08248	-0.1818	0.1262	0.003432	-0.4413
7	rs7802070	13.0695	27508585	C	A	-0.06311	0.03069	0.1085	0.04997	0.003432	0.17161
13	rs17066011	125.898	76868251	A	G	0.0546	0.03945	-0.163	0.06303	0.003435	-0.2176
17	rs8081521	9.82345	14937078	A	G	0.03384	0.02377	-0.0965	0.03769	0.00344	-0.13034
21	rs1571662	25.0715	28503077	A	C	0.05071	0.02042	-0.06046	0.03205	0.003441	-0.11117
12	rs17022749	20.1952	94955603	A	G	-0.04445	0.04419	0.2002	0.07099	0.003442	0.24465
9	rs1547288	64.8618	9310461	G	A	0.04127	0.02018	-0.06839	0.03159	0.003442	-0.10966
7	rs12702428	112.163	48106209	G	A	0.07	0.03443	-0.1168	0.05378	0.003444	-0.1868
12	rs17322627	12.5149	108737031	G	A	0.04678	0.02174	-0.07276	0.0346	0.003445	-0.11954
15	rs4924339	52.4545	35185603	A	G	0.06501	0.02229	-0.05688	0.03521	0.003445	-0.12189
2	rs1527865	6.71071	155213618	G	A	0.04527	0.02236	-0.0778	0.03564	0.003445	-0.12307
9	rs7023568	175.391	29326375	A	C	0.02728	0.02338	-0.1022	0.03759	0.003445	-0.12948
11	rs6592657	193.881	76377819	A	G	-0.05097	0.01992	0.05827	0.03159	0.003446	0.10924
10	rs11187648	60.7645	95526044	C	A	0.02484	0.02399	-0.1108	0.03968	0.003447	-0.13564
22	rs107140	126.435	40334927	G	A	0.03354	0.01986	-0.07525	0.03146	0.003448	-0.10879
3	rs10513264	17.7039	145572381	A	G	-0.04842	0.02184	0.07249	0.0351	0.003448	0.12091
21	rs8131980	51.7016	34810007	A	G	-0.03677	0.02178	0.08074	0.03377	0.003449	0.11751
3	rs10866009	174.382	57523831	G	A	0.02117	0.0203	-0.0903	0.03225	0.003449	-0.11147
5	rs282416	47.2448	67953100	G	A	-0.03986	0.02503	0.1001	0.04082	0.003454	0.13996
7	rs7793529	102.485	153069111	C	A	-0.02767	0.02042	0.08505	0.0327	0.003455	0.11272
12	rs228609	84.212	72203210	G	A	-0.04518	0.0292	0.1135	0.04574	0.003458	0.15868
22	rs735848	52.9711	27997290	A	G	0.007641	0.02921	-0.1522	0.04621	0.003458	-0.159841
3	rs4279055	105.084	80487479	G	A	-0.03898	0.02134	0.07723	0.03354	0.00346	0.11621
6	rs495191	134.173	125528974	G	A	-0.007368	0.02669	0.1439	0.04435	0.003462	0.151268
10	rs7902063	74.8351	14276664	G	A	-0.03792	0.02256	0.08423	0.03518	0.003467	0.12215
11	rs11032342	74.6971	33708184	A	G	0.05967	0.04535	-0.1943	0.07412	0.003467	-0.25397
12	rs328730	17.38	72201706	G	A	-0.04405	0.02917	0.1145	0.04576	0.00347	0.15855
12	rs10745722	85.42	95731336	A	G	-0.004431	0.02	0.1061	0.03211	0.003471	0.110531
16	rs6498309	105.863	12564951	A	G	0.06698	0.01996	-0.04255	0.03172	0.003471	-0.10953
11	rs12801394	183.763	7687715	A	G	0.05733	0.0235	-0.07293	0.03787	0.003473	-0.13026
14	rs2884345	15.7657	53323211	G	A	0.01383	0.02166	-0.1053	0.03452	0.003475	-0.11913
6	rs1388930	116.23	50406575	G	A	-0.0225	0.02346	0.109	0.03841	0.003476	0.1315
5	rs7700977	178.54	142904949	A	C	-0.03499	0.01965	0.07296	0.03128	0.003477	0.10795
3	rs152295	50.32	64113795	A	C	-0.01245	0.02089	0.1019	0.03308	0.003479	0.11435
4	rs7677282	90.7969	53582065	A	G	-0.003128	0.03304	-0.1802	0.05082	0.003479	-0.177072
8	rs13263724	17.9445	105769530	A	G	0.07446	0.02761	-0.07715	0.04394	0.00348	-0.15161
14	rs2067060	73.369	95058737	A	G	-0.1249	0.05515	0.174	0.08618	0.003482	0.2989
3	rs3772497	200.427	59973302	A	G	0.004	0.02002	-0.1038	0.03099	0.003482	-0.1078
9	rs702223	93.9446	23813840	A	C	0.0397	0.02026	-0.07258	0.03266	0.003483	-0.11228
10	rs1904683	52.0945	52949162	A	C	0.007384	0.01993	-0.102	0.03171	0.003484	-0.109384
9	rs12336965	70.7993	138515929	A	C	0.03124	0.02311	-0.09721	0.03742	0.00349	-0.12845
10	rs7080355	209.807	12006358	G	A	-0.005275	0.03032	0.1609	0.04816	0.003493	0.166175
5	rs2455377	14.0975	55920691	A	G	-0.01856	0.01998	0.09002	0.03135	0.003493	0.10858
1	rs12088130	22.4452	200161148	G	A	0.03865	0.02037	-0.07367	0.03262	0.003495	-0.11232
6	rs9405166	90.4859	2390151	A	G	0.1143	0.03963	-0.1057	0.06403	0.003495	-0.22
11	rs2513195	180.174	101470545	G	A	0.05014	0.03617	-0.1554	0.06037	0.003499	-0.20554
11	rs10752579	34.5267	69214531	A	G	-0.1287	0.045	0.1223	0.07323	0.003501	0.251
2	rs1563021	74.7826	50296401	G	A	0.02114	0.01997	-0.08886	0.03194	0.003501	-0.11
3	rs2629123	34.9514	10817070	A	G	-0.05002	0.02041	0.06084	0.03202	0.003501	0.11086
18	rs11877837	75.4199	23043454	G	A	0.03485	0.03584	-0.1604	0.05643	0.003503	-0.19525
19	rs4804561	64.3722	11140144	G	A	-0.04721	0.02277	0.07877	0.03665	0.003505	0.12598
2	rs12623780	37.4438	71999008	A	G	0.03058	0.03404	-0.1594	0.05546	0.003505	-0.18998
18	rs1566819	41.0589	26120737	C	A	-0.03029	0.02204	0.0943	0.03655	0.003509	0.12459
1	rs10917931	76.18	164100378	A	G	-0.04094	0.01966	0.06757	0.03155	0.003509	0.10851
1	rs17537035	62.8085	34161789	A	G	-0.04348	0.02051	0.07081	0.03336	0.003518	0.11429
2	rs529002	19.9338	169703896	A	C	-0.03168	0.02017	0.07707	0.03133	0.003518	0.10875
9	rs12351067	39.6494	103968906	G	A	-0.04641	0.03056	0.1196	0.04798	0.003519	0.16601
13	rs17252048	129.045	51758352	G	A	-0.0267	0.0252	0.1136	0.04094	0.003523	0.1403
2	rs17016741	33.047	79537278	A	C	-0.06445	0.03372	0.1165	0.05205	0.003523	0.18095
15	rs4072680	238.281	81584389	A	G	0.00848	0.0201	-0.1008	0.0316	0.003525	-0.10928
9	rs7848024	113.59	105573037	A	G	-0.0364	0.02242	0.08706	0.0359	0.003536	0.12346
14	rs1294573	42.3045	91008804	A	G	0.01073	0.01988	-0.09865	0.03179	0.003538	-0.10938
12	rs10876432	155.674	53731891	G	A	0.0414	0.02202	-0.07996	0.0353	0.003539	-0.12136
8	rs12676674	119.55	77792343	G	A	0.04849	0.02996	-0.1111	0.04578	0.00354	-0.15959
7	rs427508	14.2747	138067176	G	A	0.0436	0.03029	-0.1199	0.04719	0.003541	-0.1635
8	rs1269693	46.6668	103073460	G	A	-0.02933	0.02048	0.08425	0.03312	0.003541	0.11358
6	rs10498870	164.468	70586332	A	G	-0.04575	0.02079	0.07075	0.03411	0.003542	0.1165
11	rs904551	32.9037	36096165	A	G	-0.06902	0.02387	0.06169	0.03794	0.003543	0.13071
13	rs967958	149.859	65432790	G	A	-0.02627	0.02001	0.08555	0.03271	0.003545	0.11182
19	rs350146	257.488	931523	G	A	0.02679	0.02018	-0.0853	0.03271	0.003545	-0.11209
11	rs1945569	115.037	21605753	A	G	0.01618	0.01972	-0.09431	0.03236	0.003547	-0.11049
12	rs10844656	131.312	9893079	A	G	0.03205	0.0273	-0.1155	0.04261	0.003548	-0.14755
2	rs1922772	171.334	221364518	G	A	0.0431	0.02508	-0.09281	0.03929	0.003548	-0.13591
3	rs4685841	43.7081	4927281	A	G	0.03527	0.02058	-0.07729	0.03266	0.003551	-0.11256
11	rs4910755	38.9084	5372751	C	A	-0.00136	0.02197	-0.1244	0.03603	0.003555	-0.12304
5	rs30400	68.8383	86483920	A	G	-0.0483	0.03825	0.1631	0.06162	0.003556	0.2114
6	rs852953	66.1492	72143093	A	G	0.0405	0.02107	-0.07421	0.03324	0.003557	-0.11471
13	rs9520398	103.57	108002249	C	A	0.04361	0.02082	-0.06969	0.03282	0.003559	-0.1133
9	rs7022441	61.6812	75136789	A	G	0.0465	0.01973	-0.06232	0.0317	0.00356	-0.10882
16	rs11646275	66.1785	13600342	A	G	0.02734	0.02429	-0.1068	0.03908	0.003561	-0.13414
7	rs6971362	261.822	88615862	G	A	-0.0592	0.02459	0.07517	0.03899	0.003563	0.13437
7	rs12537931	42.2742	51057161	A	G	-0.04205	0.03067	0.1287	0.04991	0.003564	0.17075
9	rs10901179	58.1905	135378948	A	G	0.0275	0.0302	-0.1371	0.04773	0.003572	-0.1646
14	rs729733	16.2268	99483941	A	C	0.06045	0.04299	-0.1701	0.06644	0.003577	-0.23055
4	rs1440588	147.07	162764014	G	A	-0.07036	0.02229	0.05233	0.03573	0.003579	0.12269
2	rs2541194	135.981	29947235	A	G	0.008151	0.025	-0.1333	0.04163	0.003581	-0.141451
2	rs11892349	125.963	79526043	G	A	-0.0633	0.03376	0.1184	0.05244	0.003582	0.1817
4	rs11734148	37.7393	147964933	G	A	-0.06311	0.05069	0.2266	0.08558	0.003583	0.28971
12	rs887357	183.207	3474645	C	A	-0.07556	0.02786	0.08023	0.04566	0.003584	0.15579
20	rs6048283	49.4066	22701120	C	A	0.01238	0.0207	-0.1024	0.03352	0.003589	-0.11478
7	rs2030779	128.577	110365453	C	A	-0.04494	0.02389	0.08755	0.03873	0.003594	0.13249
7	rs3735474	71.3451	44713264	G	A	0.05183	0.03934	-0.1606	0.06144	0.003597	-0.21243
8	rs10958022	56.9712	82334430	C	A	0.0492	0.02315	-0.07945	0.03764	0.003598	-0.12865
12	rs1114334	67.3262	73687930	A	G	-0.0264	0.02328	0.1014	0.03721	0.003599	0.1278
1	rs11240657	128.743	204041346	A	G	-0.03125	0.02838	0.1211	0.04398	0.0036	0.15235
20	rs856431	47.2168	51249816	G	A	0.02396	0.03589	-0.1733	0.05748	0.0036	-0.19726
12	rs10774925	126.009	117882412	G	A	0.05582	0.01974	-0.05351	0.03195	0.003602	-0.10933
18	rs9953270	14.8208	24687371	G	A	-0.02178	0.02147	0.09806	0.03512	0.003602	0.11984
6	rs1408064	103.96	133188860	G	A	-0.03372	0.01981	0.07578	0.03198	0.003603	0.1095
2	rs11886565	85.2553	241898520	A	G	0.00259	0.02066	-0.1096	0.03256	0.003605	-0.11219
17	rs11655548	132.893	1283998	G	A	-0.05684	0.022	0.06286	0.03475	0.003609	0.1197
4	rs6840875	40.5504	53604587	A	G	-0.004532	0.03381	-0.1847	0.05184	0.003611	-0.180168
17	rs4128644	47.6629	10082159	G	A	0.04598	0.03122	-0.1263	0.05032	0.003613	-0.17228
16	rs209456	120.273	22849941	G	A	0.03418	0.02093	-0.0808	0.03351	0.003614	-0.11498
21	rs1888495	39.6457	41448053	G	A	0.08893	0.03191	-0.0896	0.0524	0.003614	-0.17853
15	rs12591800	72.1052	36209896	A	G	-0.04226	0.02038	0.06968	0.03262	0.003615	0.11194
2	rs3739005	65.8158	101566070	A	G	0.02288	0.01988	-0.08519	0.03137	0.003616	-0.10807
8	rs7011696	29.2912	5964052	A	G	-0.01622	0.02063	0.0968	0.03291	0.003618	0.11302
10	rs7913727	103.775	14683648	G	A	-0.0626	0.05728	0.249	0.09048	0.003622	0.3116
17	rs2684	33.3552	65052605	A	G	-0.01336	0.01962	0.09578	0.03198	0.003625	0.10914
9	rs12345598	50.8709	35855218	A	C	0.04118	0.02442	-0.09204	0.03874	0.003628	-0.13322
5	rs11241390	8.58	115756397	A	G	0.03241	0.02926	-0.1332	0.04884	0.00363	-0.16561
16	rs11075236	123.886	14464656	C	A	-0.05116	0.02055	0.06272	0.03334	0.003638	0.11388
2	rs707039	56.678	155226644	G	A	0.04063	0.02141	-0.07686	0.03427	0.003644	-0.11749
4	rs6811377	101.371	41656630	A	G	-0.02531	0.01997	0.08392	0.03182	0.003646	0.10923
5	rs1423380	34.0817	100221189	G	A	-0.0494	0.02031	0.06002	0.03168	0.003646	0.10942
3	rs6550987	61.4109	25775356	A	C	0.04273	0.02735	-0.1075	0.04384	0.003649	-0.15023
11	rs4936934	31.5037	124335917	A	C	0.06065	0.03138	-0.1095	0.04942	0.003651	-0.17015
9	rs9298904	68.0864	29248171	A	G	-0.07067	0.05139	0.201	0.07806	0.003651	0.27167
11	rs1502076	47.4054	115542933	A	G	-0.05185	0.03118	0.1223	0.05117	0.003656	0.17415
14	rs8014764	113.539	29126355	A	G	0.05957	0.02508	-0.0764	0.03949	0.003656	-0.13597
11	rs3019593	90.36	68538939	G	A	-0.1041	0.04016	0.123	0.06704	0.003659	0.2271
[truncated: 558,712 more rows]
