# Supplementary material for: Genome-wide interaction study of a proxy for stress-sensitivity and its prediction of major depressive disorder
Source: PLoS One. 2018 Dec 20;13(12):e0209160. doi: 10.1371/journal.pone.0209160 (PMC6301766; doi:10.1371/journal.pone.0209160)
Supplement: S1 Table — (XLSX) [file pone.0209160.s011.xlsx]

## Sheet: Sheet1
S1 Table. EPQN comparison between MDD cases and healthy controls
	GS:SFHS (N = 7 155)
	Unmatched samples			Matched samples
	Controls	MDD cases	p value	Controls	MDD cases	p value
n	5 145	2 010	-	2 010	2 010	-
Sex = females (%)	2095 (40.7)	1340 (66.7)	< 0.001	1 329 (66.1)	1 340 (66.7)	0.738
Age mean (s.d.)	51.80 (11.78)	46.99 (12.06)	< 0.001	47.52 (11.90)	46.99 (12.06)	0.155
PRSD mean (s.d.)	-0.04 (0.68)	0.09 (0.69)	< 0.001	0.09 (0.66)	0.09 (0.69)	0.99
EPQN mean (s.d.)	3.16 (2.89)	6.42 (3.32)	< 0.001	3.56 (3.00)	6.42 (3.32)	< 0.001
	UKB (N = 23 092)
	Unmatched samples			Matched samples
	Controls	MDD cases	p value	Controls	MDD cases	p value
n	15 258	7 834	-	7 834	7 834	-
Sex = females (%)	6 654 (43.6)	4 856 (62.0)	< 0.001	4 857 (62.0)	4 856 (62.0)	1
Age mean (s.d.)	58.30 (8.06)	56.64 (7.92)	< 0.001	56.71 (8.23)	56.64 (7.92)	0.631
PRSD mean (s.d.)	-0.06 (0.99)	0.11 (1.00)	< 0.001	0.11 (0.98)	0.11 (1.00)	0.542
EPQN mean (s.d.)	2.79 (2.62)	5.64 (3.30)	< 0.001	2.97 (2.66)	5.64 (3.30)	< 0.001
Matched samples: cases and controls were matched for PRS weighted by MDD-PGC GWAS (PRSD), sex and age.
