# Supplementary material for: Genome-wide interaction study of a proxy for stress-sensitivity and its prediction of major depressive disorder
Source: PLoS One. 2018 Dec 20;13(12):e0209160. doi: 10.1371/journal.pone.0209160 (PMC6301766; doi:10.1371/journal.pone.0209160)
Supplement: S2 File — (CSV) [file pone.0209160.s003.csv]

##########################################################################
#
#	BP Base pair position (GRCh37/hg19)
#	A1 minor allele.
#	A2 major allele.
#	BETA1 SNP effect in neuroticism score (EPQN) within MDD controls.
#	SE1 Standard error BETA1.
#	BETA2 SNP effect in EPQN within MDD cases.
#	SE2 Standard error BETA2.
#	P reflects significance of BETA coefficient.
#	BETA stress-sensitivity effect (i.e. differential allelic effect in EPQN between MDD cases and controls; BETA2 effect minus BETA1 effect).
#
##########################################################################
CHR	SNP	GenDist	BP	A1	A2	BETA1	SE1	BETA2	SE2	P	BETA
11	rs2221540	0	132716369	G	A	-0.1362	0.06346	0.5033	0.1096	4.41e-07	0.6395
6	rs319924	0	64487247	G	A	0.08516	0.03036	-0.2229	0.05302	4.619e-07	-0.30806
10	rs2256220	0	24856314	C	T	-0.07145	0.03121	0.2416	0.05459	6.427e-07	0.31305
16	rs4783107	0	84996447	T	C	-0.1134	0.04602	0.3404	0.08248	1.551e-06	0.4538
10	rs2265265	0	24854876	T	G	-0.06464	0.03012	0.2206	0.05277	2.682e-06	0.28524
19	rs1078734	0	39308874	C	T	0.08035	0.03003	-0.2066	0.05328	2.713e-06	-0.28695
11	rs4575282	0	132719646	C	T	-0.1084	0.06247	0.4692	0.107	3.159e-06	0.5776
6	rs1057530	0	64427095	T	C	0.0948	0.03001	-0.1876	0.05283	3.336e-06	-0.2824
6	rs10485358	0	64386060	T	C	0.09146	0.03004	-0.1902	0.05277	3.514e-06	-0.28166
5	rs3913723	0	41560079	G	A	0.1371	0.06798	-0.4449	0.1153	1.365e-05	-0.582
19	rs2075588	0	39306425	C	A	0.07358	0.0301	-0.1915	0.05335	1.507e-05	-0.26508
16	rs7199110	0	78790765	C	T	-0.06797	0.03135	0.2061	0.05543	1.683e-05	0.27407
11	rs10894606	0	132671611	C	A	-0.1572	0.07794	0.5109	0.1351	1.834e-05	0.6681
5	rs3851448	0	41625892	T	C	0.1456	0.06973	-0.4398	0.118	1.955e-05	-0.5854
7	rs222238	0	10187111	C	A	-0.06359	0.04744	0.3445	0.08371	2.222e-05	0.40809
1	rs11576947	0	152758519	C	T	-0.08881	0.03	0.167	0.05259	2.389e-05	0.25581
4	rs2202258	0	27779332	G	A	0.04042	0.02962	-0.215	0.05284	2.479e-05	-0.25542
6	rs7767473	0	64355159	T	C	0.1036	0.03047	-0.1562	0.05378	2.631e-05	-0.2598
4	rs6812305	0	16396682	A	G	0.07238	0.03107	-0.1932	0.05515	2.719e-05	-0.26558
15	rs16975754	0	96419749	A	G	-0.05835	0.03783	0.2595	0.06566	2.737e-05	0.31785
13	rs7994886	0	21674899	C	T	-0.06246	0.03187	0.2041	0.0553	2.958e-05	0.26656
16	rs2305691	0	57171397	C	T	0.08997	0.04684	-0.3093	0.08337	2.982e-05	-0.39927
4	rs10014448	0	27760141	A	G	-0.03324	0.02975	0.219	0.05273	3.089e-05	0.25224
9	rs1980888	0	91900556	A	G	0.07782	0.04531	-0.3088	0.08117	3.198e-05	-0.38662
4	rs13110484	0	27757391	C	T	0.05505	0.03085	-0.2065	0.05481	3.206e-05	-0.26155
7	rs222271	0	10205398	G	T	-0.05484	0.04336	0.3068	0.07548	3.254e-05	0.36164
5	rs246565	0	71809247	T	G	0.04208	0.0392	-0.2844	0.06821	3.324e-05	-0.32648
16	rs8054554	0	84981974	T	C	-0.08695	0.04007	0.2503	0.07084	3.415e-05	0.33725
1	rs1034109	0	152759678	C	T	-0.07986	0.02986	0.1688	0.05217	3.53e-05	0.24866
11	rs4245110	0	132698715	A	C	-0.1017	0.06631	0.448	0.116	3.914e-05	0.5497
7	rs10267816	0	22129599	C	T	-0.2952	0.09541	0.4589	0.1571	4.1e-05	0.7541
7	rs6462495	0	1034574	G	A	0.01976	0.03132	-0.2406	0.05527	4.158e-05	-0.26036
4	rs13133104	0	25309815	A	G	-0.1041	0.0523	0.3373	0.09426	4.23e-05	0.4414
20	rs2426725	0	56007659	A	G	0.03395	0.03981	0.3632	0.06988	4.244e-05	0.32925
10	rs10508695	0	25764413	T	C	-0.1276	0.04307	0.2266	0.07515	4.329e-05	0.3542
4	rs13144861	0	27797571	C	T	0.04995	0.03175	-0.2134	0.05604	4.354e-05	-0.26335
16	rs2665311	0	86345298	G	A	0.08425	0.03438	-0.1979	0.05992	4.43e-05	-0.28215
5	rs33419	0	71846721	G	A	0.03264	0.03609	-0.2637	0.06315	4.622e-05	-0.29634
5	rs9293292	0	71696942	T	C	0.02129	0.04229	-0.3236	0.07343	4.702e-05	-0.34489
4	rs7677623	0	27763567	G	A	0.03484	0.02971	-0.2113	0.05296	5.053e-05	-0.24614
3	rs4455277	0	192614308	T	C	-0.02204	0.02979	0.2199	0.05183	5.176e-05	0.24194
1	rs7518038	0	76154430	A	G	0.08714	0.03247	-0.1769	0.05669	5.322e-05	-0.26404
13	rs9509508	0	21625473	C	T	-0.05598	0.03329	0.2142	0.05803	5.378e-05	0.27018
1	rs211718	0	76106675	T	C	0.08754	0.0324	-0.1751	0.05655	5.587e-05	-0.26264
9	rs1021879	0	73923082	A	G	0.08607	0.04383	-0.2704	0.07698	5.731e-05	-0.35647
11	rs404509	0	114114377	A	G	-0.0516	0.05081	0.3638	0.08999	5.824e-05	0.4154
13	rs9543366	0	73984451	T	C	0.1908	0.07362	-0.4076	0.1297	5.993e-05	-0.5984
1	rs11205102	0	152747126	A	G	-0.08803	0.02989	0.1526	0.05213	6.222e-05	0.24063
13	rs4770094	0	21612791	G	A	-0.06259	0.03359	0.2086	0.05887	6.294e-05	0.27119
1	rs4845322	0	152747890	A	G	-0.08775	0.02989	0.1525	0.05211	6.348e-05	0.24025
1	rs10925648	0	238588516	C	T	0.2383	0.08438	-0.4371	0.1464	6.42e-05	-0.6754
10	rs2339794	0	53375420	C	T	0.09064	0.04558	-0.2746	0.07923	6.447e-05	-0.36524
9	rs13285368	0	91801585	T	C	0.07708	0.04449	-0.2858	0.0792	6.462e-05	-0.36288
6	rs6910880	0	105845906	A	G	0.009588	0.03223	-0.2491	0.05618	6.499e-05	-0.258688
8	rs6990507	0	96732452	A	C	-0.07594	0.03258	0.1869	0.05717	6.499e-05	0.26284
2	rs10168780	0	223836467	G	T	0.1406	0.05105	-0.2692	0.08919	6.678e-05	-0.4098
1	rs7549149	0	24385997	G	T	0.06018	0.03618	-0.2317	0.0638	6.891e-05	-0.29188
10	rs1556398	0	24851663	A	G	-0.03744	0.03367	0.2284	0.05768	6.907e-05	0.26584
1	rs11811060	0	24388417	G	A	0.05569	0.03886	-0.2537	0.06737	6.937e-05	-0.30939
3	rs1865396	0	10666716	C	T	0.1637	0.05272	-0.2641	0.09372	6.958e-05	-0.4278
4	rs11736535	0	146139896	G	A	-0.0226	0.03188	-0.2788	0.05613	7.221e-05	-0.2562
1	rs11249061	0	24386125	T	C	0.05792	0.03618	-0.2326	0.06383	7.518e-05	-0.29052
16	rs4887979	0	78787891	T	C	-0.08432	0.03415	0.1893	0.06024	7.768e-05	0.27362
2	rs4673509	0	200711563	C	A	-0.1775	0.07631	0.4386	0.136	7.801e-05	0.6161
19	rs799184	0	16961869	C	T	-0.07974	0.0309	0.1663	0.0541	7.83e-05	0.24604
9	rs1331190	0	91720619	C	T	0.06204	0.0484	-0.3255	0.0855	7.991e-05	-0.38754
2	rs6715108	0	37938132	G	A	-0.06988	0.02995	0.1679	0.05233	8.014e-05	0.23778
5	rs13358894	0	71803446	C	T	0.03623	0.03893	-0.272	0.06784	8.134e-05	-0.30823
20	rs6046151	0	19487535	G	A	0.03298	0.03214	-0.2242	0.05683	8.164e-05	-0.25718
5	rs6862221	0	71754962	C	T	0.04799	0.03888	-0.2577	0.06732	8.4e-05	-0.30569
1	rs11582179	0	97838887	C	T	-0.03368	0.03503	0.2451	0.06164	8.404e-05	0.27878
20	rs8118494	0	37228659	T	G	-0.1293	0.08372	0.5414	0.1486	8.428e-05	0.6707
5	rs9293289	0	71683885	A	G	0.01103	0.03412	-0.2577	0.05927	8.511e-05	-0.26873
11	rs7106576	0	132682455	G	A	-0.06111	0.04965	0.3358	0.08806	8.613e-05	0.39691
5	rs887344	0	149549022	T	C	-0.03989	0.03013	0.1969	0.05235	8.831e-05	0.23679
4	rs7680585	0	139530310	A	C	-0.101	0.04449	0.2574	0.07991	8.9e-05	0.3584
11	rs2012223	0	132624887	C	T	-0.1332	0.06367	0.3609	0.109	9.082e-05	0.4941
1	rs10875080	0	97849296	A	G	-0.03642	0.03309	0.2257	0.05833	9.269e-05	0.26212
1	rs2152878	0	97853443	C	T	-0.03507	0.03454	0.2384	0.06084	9.275e-05	0.27347
1	rs11586125	0	24377326	C	T	0.06266	0.03735	-0.2323	0.06595	9.954e-05	-0.29496
4	rs17781702	0	145984839	A	C	-0.01965	0.03101	-0.2625	0.05422	0.000101	-0.24285
2	rs12465679	0	67935402	A	G	0.08034	0.04004	-0.2354	0.07073	0.0001024	-0.31574
4	rs3733449	0	90572322	T	C	-0.08793	0.02652	0.1204	0.04664	0.0001034	0.20833
6	rs7762059	0	64521068	G	A	0.05446	0.03201	-0.194	0.05562	0.0001081	-0.24846
6	rs10944520	0	91793109	T	C	-0.281	0.08215	0.3488	0.1404	0.0001086	0.6298
1	rs6689049	0	152729136	C	T	-0.08546	0.03004	0.1478	0.05232	0.0001101	0.23326
3	rs6441802	0	42470438	A	G	-0.04021	0.03535	0.2351	0.06183	0.0001107	0.27531
9	rs10987199	0	128968987	T	C	0.07672	0.04912	-0.313	0.08806	0.000111	-0.38972
5	rs17082472	0	92020006	C	T	-0.07847	0.05273	0.3307	0.09193	0.000113	0.40917
6	rs1482458	0	64646239	G	A	0.08306	0.03066	-0.155	0.05353	0.000114	-0.23806
1	rs351625	0	4365471	T	G	-0.06774	0.03099	0.1735	0.05445	0.0001176	0.24124
16	rs2696819	0	86347358	A	G	0.07444	0.03428	-0.1907	0.05975	0.0001184	-0.26514
18	rs1943555	0	28271382	G	A	-0.04077	0.08373	0.6033	0.1457	0.0001264	0.64407
12	rs1485404	0	30282870	C	A	-0.1171	0.03695	0.1709	0.06543	0.0001265	0.288
17	rs9908294	0	29884773	T	C	-0.1104	0.03078	0.1278	0.0542	0.0001328	0.2382
9	rs11787606	0	118649073	A	C	0.1927	0.06267	-0.2991	0.1126	0.0001355	-0.4918
13	rs12870778	0	73991684	T	C	0.2	0.07517	-0.3763	0.131	0.0001357	-0.5763
1	rs2485662	0	156083468	T	C	0.05155	0.03423	-0.211	0.0598	0.0001389	-0.26255
18	rs4797352	0	9066790	T	G	-0.05024	0.03114	0.1878	0.05422	0.0001403	0.23804
1	rs3909721	0	80877080	A	G	0.01986	0.04161	-0.3036	0.07406	0.0001405	-0.32346
6	rs7773617	0	168673955	T	G	-0.0694	0.03457	0.2008	0.06199	0.0001408	0.2702
1	rs11163924	0	76132070	A	C	0.0846	0.03256	-0.165	0.05694	0.0001412	-0.2496
2	rs999672	0	123760784	C	A	0.08572	0.04024	-0.226	0.07135	0.0001414	-0.31172
4	rs6535746	0	151637268	C	A	-0.04599	0.0303	0.1879	0.05354	0.000143	0.23389
2	rs960246	0	223937559	T	G	0.1305	0.04828	-0.2485	0.08724	0.0001443	-0.379
2	rs12623591	0	104421572	C	T	0.2053	0.079	-0.4079	0.1407	0.000145	-0.6132
9	rs2417008	0	128970219	A	G	0.06557	0.0488	-0.3142	0.08722	0.000145	-0.37977
2	rs10496149	0	67929132	G	A	0.07816	0.04001	-0.2308	0.0708	0.0001452	-0.30896
1	rs1332506	0	152724053	T	C	-0.08412	0.03007	0.1452	0.05239	0.0001465	0.22932
4	rs1430961	0	90552920	G	A	-0.09388	0.02676	0.1133	0.04756	0.000147	0.20718
1	rs7534754	0	76185308	A	G	0.08723	0.03248	-0.1603	0.05659	0.0001485	-0.24753
10	rs10733849	0	53393629	C	T	0.07749	0.04404	-0.2582	0.07686	0.0001507	-0.33569
6	rs9371687	0	153627062	C	T	-0.08852	0.0315	0.1541	0.05574	0.0001511	0.24262
13	rs17242647	0	39161716	G	A	0.1329	0.04995	-0.2525	0.08864	0.000152	-0.3854
12	rs11061029	0	131092122	A	G	0.03154	0.03005	-0.1986	0.05282	0.0001525	-0.23014
10	rs4917737	0	98168154	C	T	0.0266	0.03244	-0.222	0.05712	0.000154	-0.2486
9	rs7021461	0	128972210	C	A	0.06376	0.04878	-0.3143	0.08726	0.0001559	-0.37806
18	rs1942710	0	62677867	T	C	-0.08382	0.03058	0.1511	0.0541	0.0001564	0.23492
12	rs12310861	0	102968473	A	C	0.05274	0.03882	-0.2445	0.06844	0.0001587	-0.29724
2	rs159395	0	123582223	A	G	0.08546	0.03924	-0.2157	0.06945	0.0001596	-0.30116
10	rs12763436	0	25757095	T	G	-0.1342	0.04557	0.2122	0.07981	0.0001632	0.3464
1	rs2281164	0	14130628	G	A	0.006252	0.03303	-0.243	0.05734	0.0001654	-0.249252
1	rs1146581	0	76213024	G	T	0.06351	0.03174	-0.1764	0.05529	0.0001679	-0.23991
4	rs10000875	0	90538108	C	T	-0.1417	0.09036	0.5504	0.1602	0.000168	0.6921
2	rs6752467	0	102855241	A	G	-0.07604	0.04284	0.2448	0.07375	0.0001684	0.32084
5	rs10042132	0	71789021	T	C	0.03727	0.0384	-0.2529	0.06695	0.0001704	-0.29017
12	rs2075258	0	109661979	C	T	0.0587	0.03598	-0.2139	0.06303	0.000173	-0.2726
22	rs5766743	0	46607378	G	A	0.06888	0.03578	-0.2055	0.06376	0.0001743	-0.27438
8	rs7000560	0	16993943	C	A	0.05392	0.03252	-0.1923	0.05707	0.0001774	-0.24622
4	rs7686302	0	27805588	C	A	0.04242	0.03039	-0.1891	0.05378	0.0001785	-0.23152
8	rs448852	0	131865742	A	G	-0.07555	0.03764	0.2083	0.06583	0.0001819	0.28385
10	rs1227779	0	71687211	T	C	0.01634	0.03167	-0.2226	0.05555	0.0001867	-0.23894
11	rs3181261	0	118212671	T	C	0.1981	0.05511	-0.2173	0.09655	0.0001868	-0.4154
6	rs12214565	0	148066394	T	C	0.1257	0.0498	-0.2458	0.08611	0.0001877	-0.3715
20	rs2876536	0	19521422	G	A	0.0215	0.032	-0.2224	0.05692	0.0001878	-0.2439
17	rs7218952	0	26196172	A	C	0.06005	0.03223	-0.1817	0.05618	0.0001894	-0.24175
5	rs10043659	0	71781839	C	T	0.03119	0.03778	-0.2528	0.0661	0.0001913	-0.28399
14	rs4344631	0	52201376	T	G	-0.02017	0.03108	0.2152	0.05499	0.0001939	0.23537
9	rs12337910	0	139929435	G	A	-0.07799	0.05274	0.3187	0.0925	0.000195	0.39669
7	rs16873582	0	138596001	A	G	-0.1269	0.05628	0.2899	0.09681	0.0001972	0.4168
9	rs2094763	0	128975311	G	A	0.06331	0.04882	-0.3095	0.08751	0.0001991	-0.37281
8	rs11782884	0	8397785	A	C	-0.02241	0.03105	0.2116	0.05471	0.0001994	0.23401
5	rs16888239	0	50280687	T	C	-0.02324	0.04327	0.2996	0.07534	0.0002023	0.32284
3	rs7622411	0	43807124	T	G	0.1121	0.03511	-0.1488	0.06084	0.0002045	-0.2609
10	rs7079618	0	53404013	A	C	0.07924	0.04336	-0.2428	0.07515	0.0002056	-0.32204
1	rs1341573	0	74896816	C	T	-0.08436	0.03411	0.1707	0.05965	0.0002057	0.25506
10	rs3762096	0	98136250	A	G	0.06166	0.03155	-0.1764	0.0559	0.000208	-0.23806
19	rs706760	0	16953880	G	A	-0.07969	0.03082	0.1505	0.05387	0.0002081	0.23019
13	rs4411360	0	21688063	C	T	-0.1082	0.05868	0.3421	0.1063	0.0002093	0.4503
1	rs11161510	0	76210289	T	C	0.08386	0.03257	-0.1586	0.05684	0.0002145	-0.24246
7	rs10488388	0	130901669	T	C	0.0154	0.05366	-0.386	0.09429	0.0002161	-0.4014
10	rs2930121	0	127874740	G	A	-0.1578	0.05966	0.2969	0.1076	0.0002191	0.4547
10	rs2927510	0	127874820	A	G	-0.1513	0.06013	0.3074	0.1086	0.0002195	0.4587
10	rs7921016	0	20301670	G	A	0.0613	0.02988	-0.1631	0.05289	0.0002208	-0.2244
6	rs7741545	0	105841041	C	T	0.01456	0.03166	-0.2223	0.05578	0.0002215	-0.23686
22	rs4253730	0	46610409	G	A	0.07162	0.03572	-0.1975	0.06354	0.0002221	-0.26912
15	rs1568717	0	61362447	A	C	-0.08164	0.03361	0.1732	0.06034	0.0002247	0.25484
9	rs10990270	0	105503295	C	T	0.05113	0.03264	-0.1925	0.05743	0.0002253	-0.24363
22	rs4823613	0	46598307	G	A	0.07141	0.03609	-0.2003	0.06422	0.0002257	-0.27171
7	rs2888567	0	88387997	G	A	-0.004103	0.03522	0.2542	0.06053	0.000226	0.258303
2	rs10170110	0	8070689	A	G	-0.03805	0.07565	0.5322	0.1349	0.0002262	0.57025
1	rs4845488	0	152778576	A	G	0.0709	0.03014	-0.1521	0.05243	0.0002263	-0.223
10	rs10821759	0	62176933	T	G	-0.001372	0.04165	-0.3086	0.07217	0.0002269	-0.307228
11	rs10770136	0	10715124	T	C	-0.1031	0.03333	0.1448	0.05851	0.0002315	0.2479
6	rs9497852	0	148049016	G	A	0.1583	0.04591	-0.1797	0.07956	0.0002337	-0.338
9	rs13287491	0	10457788	C	T	0.06344	0.04495	-0.2649	0.07711	0.0002343	-0.32834
18	rs12969149	0	22130823	T	C	-0.2018	0.06912	0.3033	0.1188	0.0002375	0.5051
10	rs4962633	0	126181395	A	C	-0.1054	0.03003	0.1191	0.05319	0.0002379	0.2245
20	rs6030739	0	41890453	T	C	0.05182	0.04695	-0.2983	0.08294	0.000239	-0.35012
1	rs1251079	0	76189445	T	C	0.05124	0.03055	-0.1749	0.05345	0.0002394	-0.22614
3	rs4682737	0	42484782	A	G	-0.0378	0.03513	0.222	0.06151	0.0002442	0.2598
19	rs10414737	0	49171593	C	T	-0.04652	0.04392	0.2771	0.07655	0.0002457	0.32362
4	rs7674517	0	16411704	T	C	-0.04199	0.03048	0.1839	0.05359	0.0002485	0.22589
3	rs6799976	0	175008948	A	G	0.06561	0.03197	-0.1718	0.05638	0.0002494	-0.23741
2	rs296039	0	123574925	A	G	0.0852	0.03936	-0.2078	0.06972	0.0002526	-0.293
15	rs12907002	0	44347500	C	T	-0.187	0.06334	0.2785	0.1104	0.0002546	0.4655
5	rs4703855	0	71693899	T	C	0.01639	0.03403	-0.2336	0.05931	0.0002555	-0.24999
6	rs535479	0	163529076	C	T	-0.03853	0.03049	0.1865	0.05347	0.000256	0.22503
9	rs1999377	0	11919732	C	T	0.07074	0.06425	-0.4116	0.1153	0.0002565	-0.48234
13	rs9565770	0	82974961	C	A	-0.04826	0.03085	0.1792	0.05406	0.0002572	0.22746
9	rs4743577	0	105507920	G	A	0.08459	0.03089	-0.1445	0.05458	0.0002591	-0.22909
13	rs9596054	0	31607186	A	G	-0.05122	0.03022	0.171	0.05288	0.0002644	0.22222
10	rs7098224	0	50162809	T	G	0.0801	0.0305	-0.1449	0.05363	0.0002653	-0.225
10	rs3829206	0	50165128	G	A	0.0792	0.03049	-0.1458	0.05363	0.0002659	-0.225
17	rs208015	0	46252346	T	C	-0.1056	0.05857	0.327	0.1037	0.0002811	0.4326
7	rs38545	0	81804220	A	G	0.0203	0.0405	-0.2779	0.07141	0.0002812	-0.2982
22	rs5768108	0	48281630	C	T	0.05428	0.05004	-0.3114	0.0874	0.0002828	-0.36568
6	rs9347781	0	164155654	T	C	-0.05849	0.03922	0.2299	0.0691	0.000283	0.28839
5	rs1019457	0	71763154	T	G	0.0238	0.03609	-0.2405	0.06324	0.0002833	-0.2643
2	rs6724312	0	123556174	T	C	0.09725	0.04098	-0.2048	0.07246	0.0002851	-0.30205
10	rs11815649	0	34218093	G	T	0.02688	0.03138	-0.2034	0.05518	0.0002863	-0.23028
2	rs486981	0	169782149	A	G	0.06942	0.03087	-0.1579	0.05455	0.0002875	-0.22732
13	rs9507671	0	26700180	G	A	-0.03235	0.03379	0.2124	0.05844	0.0002882	0.24475
8	rs3102480	0	96738171	C	A	-0.03977	0.03704	0.2351	0.06621	0.0002912	0.27487
13	rs1322736	0	66794838	A	G	0.05973	0.03072	-0.1647	0.05379	0.0002914	-0.22443
20	rs11696394	0	19507731	G	T	0.02389	0.03222	-0.213	0.05692	0.0002917	-0.23689
5	rs6894855	0	111149480	C	A	-0.01157	0.03463	0.2446	0.06168	0.0002937	0.25617
7	rs4716535	0	157823810	T	C	-0.05652	0.03551	0.2022	0.06203	0.0002946	0.25872
6	rs2496637	0	41455056	C	T	-0.1129	0.03908	0.1755	0.06945	0.0002947	0.2884
6	rs317795	0	159085005	A	G	-0.1514	0.04215	0.155	0.07342	0.0002956	0.3064
10	rs2503870	0	43796180	T	C	0.05578	0.03492	-0.1992	0.06123	0.0002978	-0.25498
11	rs10899363	0	76928929	A	G	-0.06574	0.03132	0.1646	0.05548	0.0002993	0.23034
20	rs6046160	0	19507573	C	T	0.02512	0.03222	-0.2114	0.05694	0.0002996	-0.23652
13	rs9300812	0	104038402	A	G	-0.0387	0.04691	0.3078	0.0836	0.0003006	0.3465
22	rs4253728	0	46610067	A	G	0.05914	0.03569	-0.2044	0.06357	0.000301	-0.26354
13	rs1887894	0	21607600	A	G	-0.06884	0.03442	0.1831	0.06062	0.0003011	0.25194
12	rs10772890	0	16197432	T	C	-0.1393	0.03664	0.1307	0.06511	0.0003021	0.27
2	rs10196493	0	57921232	T	C	-0.01756	0.03409	0.2321	0.06013	0.0003036	0.24966
2	rs3769825	0	202111380	A	G	-0.07748	0.03015	0.1421	0.05278	0.0003036	0.21958
4	rs203438	0	16242215	A	G	0.08047	0.03284	-0.1604	0.05805	0.0003042	-0.24087
5	rs10061494	0	121376031	A	G	-0.4877	0.1937	0.847	0.3148	0.0003045	1.3347
7	rs6961372	0	111776779	G	A	0.1615	0.08185	-0.4366	0.144	0.0003048	-0.5981
11	rs10734656	0	10719454	G	A	-0.1029	0.03348	0.141	0.05869	0.0003063	0.2439
18	rs12458817	0	8900317	G	A	0.09826	0.03902	-0.1864	0.06854	0.0003066	-0.28466
12	rs6490111	0	117565281	G	T	0.04851	0.02992	-0.1719	0.05328	0.0003088	-0.22041
12	rs9971688	0	30279566	A	G	-0.08729	0.03418	0.1607	0.05965	0.0003096	0.24799
18	rs3912267	0	8893922	C	A	0.09845	0.0331	-0.1427	0.05812	0.0003111	-0.24115
11	rs7114199	0	10732967	T	C	-0.1103	0.03349	0.1338	0.05883	0.0003114	0.2441
6	rs942132	0	134142660	C	T	-0.08972	0.03741	0.1806	0.06501	0.0003134	0.27032
13	rs9509495	0	21611791	C	T	-0.04499	0.0427	0.2644	0.07463	0.0003204	0.30939
10	rs10829489	0	130555220	G	A	0.04382	0.03221	-0.1885	0.05597	0.0003214	-0.23232
16	rs1424083	0	74304865	A	G	0.08942	0.03345	-0.1522	0.05833	0.0003271	-0.24162
11	rs420234	0	114107966	C	T	-0.06565	0.06162	0.3861	0.1096	0.0003283	0.45175
12	rs2300453	0	109655154	G	T	0.08457	0.04061	-0.2082	0.07069	0.0003286	-0.29277
15	rs3097437	0	27872136	C	A	0.01588	0.08611	-0.5936	0.1462	0.000329	-0.60948
7	rs2519910	0	88373596	A	G	-0.01716	0.03347	0.223	0.05797	0.0003335	0.24016
6	rs6913021	0	92229590	G	T	-0.0458	0.03813	0.2327	0.06761	0.0003342	0.2785
6	rs9356135	0	164109438	T	G	-0.04121	0.0414	0.2579	0.0724	0.000335	0.29911
11	rs11602469	0	10538816	T	C	-0.04615	0.05835	0.3751	0.1019	0.0003358	0.42125
2	rs494874	0	169789306	T	C	0.06278	0.03125	-0.1643	0.05508	0.0003359	-0.22708
3	rs1447840	0	192706711	C	T	0.03957	0.03012	-0.1779	0.05268	0.000339	-0.21747
1	rs10782582	0	76383297	A	G	-0.0497	0.03049	0.1716	0.05371	0.0003398	0.2213
9	rs10979978	0	112406744	T	C	0.0873	0.03246	-0.1485	0.05731	0.0003434	-0.2358
2	rs11685642	0	182855636	A	G	-0.1233	0.03461	0.126	0.06042	0.0003435	0.2493
11	rs4936805	0	123298088	A	G	0.08073	0.03234	-0.1545	0.05722	0.0003447	-0.23523
2	rs10928190	0	144376033	T	C	-0.06806	0.03048	0.1529	0.05369	0.0003459	0.22096
13	rs9539066	0	61810785	C	A	-0.04097	0.03276	0.1939	0.05693	0.0003494	0.23487
1	rs6673491	0	94693145	T	C	-0.1109	0.05481	0.2934	0.09892	0.0003501	0.4043
13	rs9540682	0	66783412	C	T	0.0631	0.03103	-0.1602	0.05423	0.0003528	-0.2233
12	rs11056758	0	16181423	T	C	-0.08077	0.03237	0.1542	0.05728	0.0003551	0.23497
5	rs2455253	0	36483040	G	A	0.2209	0.07127	-0.2955	0.1261	0.0003623	-0.5164
1	rs17399290	0	81048650	A	C	0.02495	0.04326	-0.2822	0.07448	0.0003624	-0.30715
6	rs520741	0	163507487	G	A	-0.04904	0.03517	0.2011	0.06071	0.000363	0.25014
6	rs9497839	0	148007144	G	A	-0.08754	0.03497	0.1651	0.06163	0.0003637	0.25264
7	rs39415	0	25099673	T	C	-0.06496	0.04903	0.2819	0.08406	0.0003639	0.34686
18	rs2109616	0	9807167	G	A	-0.1106	0.03056	0.1122	0.05457	0.000368	0.2228
2	rs4971358	0	933573	G	T	0.01887	0.03026	-0.1991	0.05323	0.0003719	-0.21797
8	rs1697632	0	16704939	A	C	-0.03102	0.05328	0.3546	0.09437	0.0003732	0.38562
1	rs17390593	0	80876340	A	C	0.04214	0.04143	-0.258	0.07351	0.0003751	-0.30014
12	rs7295089	0	2440464	C	T	0.08337	0.04045	-0.2068	0.07087	0.0003757	-0.29017
13	rs7317471	0	21620085	T	C	-0.04242	0.04166	0.2555	0.07272	0.0003788	0.29792
17	rs11870926	0	26202223	A	G	0.05822	0.03487	-0.1915	0.06101	0.0003792	-0.24972
6	rs13216525	0	64470069	G	A	0.06586	0.03347	-0.1723	0.05812	0.0003827	-0.23816
5	rs2216712	0	37918703	T	C	-0.08975	0.0441	0.2306	0.07871	0.0003838	0.32035
2	rs12469824	0	6070009	G	A	-0.006303	0.03767	-0.2771	0.06634	0.0003862	-0.270797
18	rs3892214	0	47271009	A	G	-0.09546	0.03585	0.1641	0.06373	0.0003865	0.25956
6	rs1723527	0	64101818	G	A	0.004626	0.05914	-0.4197	0.1039	0.0003866	-0.424326
6	rs568619	0	163530425	T	C	-0.0511	0.03299	0.1838	0.05737	0.0003867	0.2349
17	rs12941504	0	72478313	C	T	0.05108	0.03498	-0.1987	0.06108	0.0003875	-0.24978
2	rs17371490	0	228527799	T	C	0.1187	0.04328	-0.1917	0.07607	0.0003893	-0.3104
6	rs6912246	0	64619150	G	A	0.06494	0.03109	-0.1569	0.05426	0.0003893	-0.22184
8	rs4840986	0	8394877	T	C	-0.02675	0.03055	0.1916	0.05345	0.0003905	0.21835
6	rs7754461	0	101688127	G	A	-0.1817	0.06348	0.2825	0.1145	0.0003919	0.4642
5	rs3805452	0	71495041	C	T	0.07076	0.0341	-0.1774	0.06113	0.0003925	-0.24816
2	rs6757951	0	223355051	G	A	0.07638	0.02995	-0.139	0.05288	0.0003931	-0.21538
13	rs2312972	0	31605117	C	T	-0.04904	0.03024	0.1668	0.05286	0.0003942	0.21584
9	rs13290614	0	128780293	T	C	0.06778	0.05196	-0.3098	0.09305	0.000395	-0.37758
9	rs13290624	0	128780313	T	C	0.06778	0.05196	-0.3098	0.09305	0.000395	-0.37758
5	rs1124188	0	113645899	A	G	-0.003105	0.03318	-0.2374	0.05721	0.000396	-0.234295
12	rs7132044	0	130628973	G	A	-0.09326	0.03552	0.1623	0.06284	0.0003991	0.25556
6	rs524763	0	163530507	T	C	-0.05133	0.03284	0.1822	0.0572	0.0003993	0.23353
5	rs16870224	0	40692940	A	G	0.08925	0.04822	-0.2483	0.08224	0.0003995	-0.33755
12	rs7306935	0	103037430	C	A	0.08661	0.04157	-0.2124	0.07354	0.0004018	-0.29901
3	rs2572690	0	5891648	C	T	-0.1529	0.06413	0.3077	0.1134	0.0004067	0.4606
8	rs6989429	0	93535437	T	C	0.01858	0.0336	-0.221	0.05885	0.0004068	-0.23958
1	rs7520333	0	41090250	G	A	-0.0796	0.03026	0.1382	0.05372	0.00041	0.2178
13	rs9509529	0	21667474	C	T	-0.03592	0.04272	0.2701	0.07536	0.0004118	0.30602
5	rs7723734	0	71717605	C	A	0.08752	0.03366	-0.1516	0.05874	0.0004124	-0.23912
1	rs11583145	0	237547355	C	T	0.06975	0.04445	-0.2483	0.07833	0.000413	-0.31805
2	rs10177148	0	87032574	C	T	-0.03275	0.1558	1.097	0.2793	0.0004133	1.12975
18	rs647241	0	8413996	A	G	-0.1135	0.04627	0.2191	0.08205	0.0004137	0.3326
3	rs2630811	0	21867628	G	T	-0.06086	0.03644	0.1962	0.06305	0.0004143	0.25706
16	rs4787763	0	25806206	C	T	-0.06172	0.03092	0.1563	0.05345	0.0004153	0.21802
9	rs12343404	0	31021638	T	G	0.1058	0.04533	-0.2142	0.07849	0.0004161	-0.32
11	rs7120717	0	22537674	A	G	-0.08516	0.03433	0.1582	0.05982	0.0004189	0.24336
5	rs3776082	0	149544045	A	G	-0.03302	0.03023	0.1807	0.05256	0.0004227	0.21372
2	rs2279990	0	28636740	G	A	0.08297	0.03107	-0.1374	0.05427	0.0004251	-0.22037
7	rs1007766	0	1034903	G	A	-0.03123	0.03007	0.1822	0.05262	0.0004298	0.21343
6	rs1208252	0	134131421	C	A	-0.09879	0.03757	0.1663	0.06533	0.0004352	0.26509
12	rs2188942	0	47852788	G	A	0.07014	0.03192	-0.1587	0.05669	0.0004354	-0.22884
3	rs7629936	0	49836707	A	G	-0.04971	0.0345	0.1966	0.06096	0.000438	0.24631
9	rs12685120	0	112107196	G	T	0.02292	0.03408	-0.2205	0.06032	0.0004411	-0.24342
19	rs892034	0	39368998	C	T	0.03345	0.0296	-0.1782	0.0525	0.0004442	-0.21165
17	rs733136	0	31676491	A	G	-0.03929	0.03298	0.192	0.05699	0.0004445	0.23129
3	rs6770532	0	94131059	T	G	-0.01047	0.03023	0.204	0.0531	0.0004469	0.21447
2	rs17015347	0	128266533	G	A	0.1685	0.07061	-0.3253	0.1217	0.0004472	-0.4938
15	rs11858405	0	96331346	T	C	-0.08412	0.05848	0.3285	0.102	0.0004499	0.41262
6	rs573070	0	163507051	T	C	-0.04542	0.03519	0.2009	0.06076	0.0004505	0.24632
10	rs4636557	0	20312209	T	C	0.06364	0.03578	-0.1922	0.06357	0.0004523	-0.25584
5	rs17074634	0	171756937	G	A	0.06032	0.05003	-0.2971	0.08878	0.0004525	-0.35742
13	rs1535650	0	95374451	T	C	-0.03801	0.03747	0.2324	0.06741	0.0004539	0.27041
6	rs9497581	0	146944056	G	A	0.02445	0.03697	-0.2378	0.06508	0.0004589	-0.26225
20	rs962349	0	8891686	C	T	-0.02321	0.03074	0.1931	0.05356	0.0004618	0.21631
10	rs2505883	0	43185875	G	A	0.06421	0.04078	-0.226	0.07216	0.0004622	-0.29021
16	rs16957557	0	10788556	T	C	0.01242	0.1107	0.8051	0.1975	0.000463	0.79268
2	rs508506	0	169784955	A	C	0.06077	0.03096	-0.1591	0.05464	0.0004634	-0.21987
5	rs29910	0	93753017	T	C	-0.05869	0.03272	0.1712	0.05696	0.0004663	0.22989
13	rs7997540	0	21650501	G	T	-0.0378	0.04139	0.2557	0.07297	0.0004676	0.2935
20	rs2179798	0	8891346	A	G	-0.02159	0.03076	0.1945	0.05357	0.0004678	0.21609
5	rs952664	0	93798480	C	T	0.07079	0.04039	-0.2107	0.06961	0.000468	-0.28149
6	rs321498	0	64579224	T	C	0.0489	0.03181	-0.1733	0.05498	0.0004681	-0.2222
12	rs2141855	0	104894707	A	G	0.004918	0.03057	-0.2132	0.05436	0.0004682	-0.218118
6	rs1208242	0	134100937	C	T	-0.09469	0.03744	0.1672	0.06484	0.0004691	0.26189
8	rs2407278	0	37399290	G	A	0.1057	0.08536	-0.5006	0.1508	0.0004693	-0.6063
6	rs12664614	0	40345698	C	A	0.1095	0.04218	-0.1843	0.07264	0.0004703	-0.2938
12	rs4930999	0	32122213	G	A	0.03236	0.03699	-0.2269	0.06428	0.0004726	-0.25926
2	rs579060	0	169783039	G	T	0.07168	0.03088	-0.1474	0.05452	0.0004726	-0.21908
6	rs1746015	0	134152181	G	A	-0.07804	0.03612	0.1757	0.06298	0.0004743	0.25374
10	rs17479671	0	98132016	C	T	0.01746	0.02997	-0.1945	0.05272	0.0004743	-0.21196
5	rs12054750	0	71729221	A	G	0.08256	0.02995	-0.1279	0.05226	0.0004751	-0.21046
2	rs2139011	0	123688145	A	G	0.09588	0.04374	-0.2143	0.07725	0.000476	-0.31018
6	rs2022988	0	162288538	C	T	-0.02816	0.05035	0.3288	0.08894	0.0004787	0.35696
2	rs552976	0	169791438	A	G	0.05468	0.03125	-0.1664	0.05507	0.0004798	-0.22108
10	rs7090877	0	130553741	A	C	0.1097	0.05764	-0.3007	0.1025	0.0004841	-0.4104
22	rs17694640	0	48344761	T	G	0.07678	0.05045	-0.2743	0.08706	0.0004842	-0.35108
9	rs3211703	0	91932309	C	T	0.04616	0.03849	-0.2273	0.06832	0.0004878	-0.27346
11	rs11216631	0	117795679	T	G	0.1439	0.06345	-0.2931	0.1081	0.0004894	-0.437
5	rs388910	0	125137593	C	T	0.08212	0.04073	-0.2085	0.07274	0.0004899	-0.29062
14	rs17224847	0	63779111	C	T	-0.08675	0.04824	0.2538	0.08496	0.000491	0.34055
6	rs1538196	0	86750307	A	C	0.07734	0.1073	-0.7232	0.2031	0.000493	-0.80054
11	rs1793675	0	126808123	A	G	0.08226	0.04187	-0.2181	0.07534	0.0004937	-0.30036
6	rs1214752	0	43396325	C	T	0.0854	0.02971	-0.1256	0.05278	0.0004945	-0.211
15	rs2055853	0	36280268	T	G	-0.04608	0.04175	0.2478	0.07331	0.0004961	0.29388
6	rs2622274	0	64240516	T	G	0.07265	0.03019	-0.1384	0.0526	0.0005025	-0.21105
21	rs225440	0	43653053	T	C	0.0606	0.0309	-0.1566	0.05428	0.000506	-0.2172
2	rs483234	0	169782574	C	T	-0.07451	0.03229	0.1528	0.05686	0.0005093	0.22731
15	rs7176113	0	92003651	A	C	0.07626	0.04165	-0.2162	0.07313	0.0005102	-0.29246
21	rs4148118	0	43666070	A	G	0.03939	0.03177	-0.1846	0.05608	0.0005108	-0.22399
6	rs2274825	0	155574427	G	A	0.1191	0.07474	-0.404	0.1307	0.0005113	-0.5231
7	rs7790821	0	88550219	A	G	-0.01908	0.03603	0.2305	0.06217	0.0005145	0.24958
2	rs193931	0	8107435	G	A	0.04884	0.02991	-0.1629	0.05314	0.0005167	-0.21174
6	rs1482463	0	64589465	T	C	0.04959	0.03169	-0.1701	0.05483	0.0005228	-0.21969
21	rs2839478	0	43667082	A	G	0.04044	0.03194	-0.1848	0.05656	0.0005259	-0.22524
15	rs896052	0	37259697	G	A	-0.08199	0.0321	0.1439	0.05671	0.0005262	0.22589
2	rs17007761	0	123225623	A	C	0.06609	0.06646	-0.3894	0.1134	0.0005288	-0.45549
12	rs10851033	0	119197995	A	G	0.07789	0.03359	-0.157	0.05889	0.0005319	-0.23489
10	rs12765810	0	20216174	A	G	-0.06821	0.03241	0.1585	0.05687	0.0005341	0.22671
5	rs13357659	0	44432885	G	A	0.05693	0.03046	-0.1559	0.05337	0.0005342	-0.21283
8	rs4909385	0	138723448	T	C	-0.07712	0.02981	0.1325	0.05268	0.0005348	0.20962
10	rs2292585	0	50186317	A	G	0.07091	0.02998	-0.1393	0.05279	0.000536	-0.21021
7	rs222315	0	10222003	G	A	-0.05231	0.03549	0.1941	0.06171	0.0005383	0.24641
19	rs17800789	0	45015020	C	T	-0.04538	0.04	0.2363	0.07091	0.00054	0.28168
16	rs1622135	0	12778076	C	A	0.03892	0.02994	-0.1706	0.05265	0.0005405	-0.20952
14	rs1753430	0	23102969	A	G	-0.07854	0.03005	0.13	0.05229	0.0005435	0.20854
10	rs2764804	0	17754812	G	A	0.05768	0.03276	-0.169	0.05685	0.0005488	-0.22668
22	rs9615322	0	48842336	G	A	0.08043	0.03043	-0.1316	0.05329	0.0005501	-0.21203
10	rs912739	0	45357291	C	T	-0.08372	0.04926	0.2614	0.08691	0.0005504	0.34512
20	rs7270760	0	8913264	T	C	-0.01918	0.03271	0.2085	0.05723	0.000553	0.22768
6	rs6457736	0	33564412	C	T	0.03803	0.03283	-0.1931	0.05834	0.0005546	-0.23113
9	rs11998995	0	135841420	T	C	-0.067	0.03155	0.1528	0.05528	0.0005553	0.2198
1	rs1986902	0	82899747	A	G	-0.07838	0.03173	0.1439	0.05606	0.0005578	0.22228
2	rs6707186	0	128303364	A	G	0.1401	0.0671	-0.3202	0.1153	0.0005596	-0.4603
11	rs2276118	0	67288594	C	T	-0.01057	0.02992	0.1976	0.0524	0.00056	0.20817
10	rs7077535	0	20309308	T	C	-0.1168	0.03213	0.1076	0.05653	0.0005601	0.2244
1	rs2391472	0	94737583	C	T	-0.1007	0.05557	0.2947	0.1003	0.0005648	0.3954
22	rs4253725	0	46608918	A	T	0.06234	0.03593	-0.1902	0.06386	0.0005672	-0.25254
22	rs4820127	0	34395171	T	C	-0.09462	0.03009	0.116	0.05321	0.0005695	0.21062
8	rs11777119	0	29932284	G	A	-0.07315	0.04021	0.2034	0.06952	0.000573	0.27655
10	rs922324	0	100292627	A	C	-0.05299	0.02999	0.1544	0.05223	0.0005731	0.20739
4	rs12644119	0	90603419	A	C	-0.08729	0.02514	0.08773	0.04419	0.0005764	0.17502
2	rs11681159	0	103180864	C	T	-0.02798	0.03142	0.1916	0.05552	0.0005769	0.21958
9	rs10821224	0	96564575	C	A	-0.06013	0.03274	0.1685	0.05782	0.0005786	0.22863
3	rs7620614	0	104057483	G	A	0.051	0.03031	-0.1587	0.05291	0.000583	-0.2097
5	rs2455258	0	36520578	G	A	0.1232	0.0555	-0.2606	0.09682	0.0005841	-0.3838
12	rs4767713	0	119197086	T	C	0.07596	0.0336	-0.1572	0.05892	0.000587	-0.23316
1	rs6541343	0	94689027	A	G	-0.122	0.05567	0.2742	0.101	0.0005886	0.3962
2	rs6747870	0	135469769	G	A	-0.05798	0.02497	0.1145	0.04358	0.0005936	0.17248
10	rs11017701	0	132878541	A	G	0.1686	0.06313	-0.2654	0.1094	0.0005938	-0.434
7	rs13232525	0	154208824	G	A	-0.1043	0.03958	0.1678	0.06866	0.0005959	0.2721
19	rs7254083	0	23255154	A	G	-0.1697	0.0628	0.2702	0.1117	0.0005965	0.4399
9	rs13297915	0	10459930	G	A	0.06216	0.04415	-0.2398	0.07608	0.0005983	-0.30196
22	rs134864	0	46074258	G	A	0.06106	0.03188	-0.1578	0.05523	0.0005991	-0.21886
1	rs12725266	0	97869199	T	C	-0.05534	0.03074	0.1601	0.05473	0.0005997	0.21544
16	rs11643790	0	57261146	A	C	0.07975	0.04595	-0.2395	0.08096	0.0006036	-0.31925
4	rs11098551	0	120843895	G	A	0.08066	0.03212	-0.1428	0.05668	0.0006039	-0.22346
8	rs10283387	0	37366861	C	T	-0.1882	0.1104	0.5538	0.1861	0.0006047	0.742
7	rs11769099	0	2926448	G	T	0.06451	0.03536	-0.18	0.06195	0.0006094	-0.24451
6	rs1014664	0	155596700	C	T	0.1375	0.0687	-0.3394	0.1211	0.0006131	-0.4769
16	rs7201546	0	29020294	T	C	-0.1051	0.04862	0.2369	0.08723	0.0006151	0.342
6	rs12210064	0	148053476	A	G	0.1512	0.05189	-0.2002	0.08853	0.0006168	-0.3514
3	rs7615782	0	11860940	C	T	0.03568	0.03252	-0.1913	0.05776	0.0006168	-0.22698
4	rs13112218	0	27812345	C	T	0.02877	0.02942	-0.1766	0.05226	0.0006169	-0.20537
22	rs4253776	0	46629479	G	A	0.09522	0.04712	-0.2313	0.08291	0.0006175	-0.32652
11	rs7124613	0	74820158	T	C	-0.1956	0.07971	0.3513	0.1385	0.0006189	0.5469
3	rs4011965	0	187050471	T	C	-0.03895	0.0364	0.2145	0.06449	0.0006193	0.25345
13	rs9509502	0	21621558	C	T	-0.05901	0.03856	0.2064	0.06729	0.0006201	0.26541
8	rs4922265	0	16996435	A	C	0.02658	0.03136	-0.1907	0.05526	0.0006259	-0.21728
11	rs2046768	0	46396479	C	T	0.06909	0.03961	-0.2064	0.07016	0.0006275	-0.27549
16	rs3749527	0	86351318	A	G	0.03712	0.04509	-0.2703	0.07778	0.0006281	-0.30742
6	rs9384302	0	155545107	A	G	0.02437	0.0665	-0.4364	0.1172	0.0006286	-0.46077
6	rs487083	0	102026932	G	T	-0.007404	0.05482	-0.3923	0.09835	0.0006294	-0.384896
11	rs2000971	0	126819397	C	A	0.08671	0.04259	-0.2131	0.07667	0.0006314	-0.29981
6	rs11751732	0	26044064	A	G	-0.04413	0.04151	0.2465	0.07428	0.0006359	0.29063
6	rs1208260	0	134108701	A	G	-0.09379	0.03735	0.1614	0.06471	0.0006373	0.25519
2	rs7560738	0	135419163	A	G	-0.05558	0.02486	0.1152	0.0434	0.0006373	0.17078
1	rs1591077	0	152734796	A	G	0.07335	0.03038	-0.1352	0.05298	0.0006396	-0.20855
4	rs4502650	0	94011311	G	A	-0.03529	0.0311	0.1802	0.05492	0.0006404	0.21549
21	rs2776402	0	47360761	C	T	-0.06643	0.03411	0.1714	0.06075	0.0006417	0.23783
10	rs12257109	0	62184600	C	T	-0.01531	0.04144	-0.2978	0.07166	0.0006427	-0.28249
9	rs12348881	0	139911983	G	T	-0.06267	0.04987	0.2826	0.08804	0.0006438	0.34527
10	rs10159685	0	72485801	T	C	-0.08127	0.0351	0.1613	0.0618	0.0006442	0.24257
4	rs9993229	0	151502267	G	A	-0.03261	0.03025	0.1755	0.05301	0.0006502	0.20811
14	rs1010461	0	21153788	C	A	-0.02488	0.03027	0.1815	0.05244	0.0006545	0.20638
1	rs490285	0	182705001	A	C	0.09867	0.03122	-0.1162	0.05481	0.0006579	-0.21487
10	rs10762400	0	72484943	A	C	-0.07974	0.03508	0.1623	0.0618	0.0006587	0.24204
10	rs10764242	0	20807211	G	A	0.01737	0.0314	-0.1965	0.05438	0.0006591	-0.21387
6	rs9384296	0	155530844	A	G	0.0205	0.04281	-0.2768	0.07611	0.0006628	-0.2973
1	rs515513	0	244448353	C	A	-0.05568	0.03026	0.1559	0.05431	0.0006643	0.21158
9	rs35902749	0	139917595	A	G	-0.1119	0.05735	0.2812	0.1003	0.0006674	0.3931
21	rs1389995	0	19024565	C	A	0.07144	0.03779	-0.1874	0.06607	0.0006716	-0.25884
10	rs7093656	0	50189949	G	T	0.06897	0.03005	-0.1378	0.05285	0.0006716	-0.20677
15	rs2639197	0	96306954	C	T	-0.02693	0.03342	0.2006	0.05798	0.0006726	0.22753
3	rs9869202	0	192625190	C	T	-0.02315	0.03034	0.1847	0.05307	0.0006736	0.20785
12	rs11067009	0	114673596	T	G	0.145	0.06054	-0.2725	0.1069	0.0006792	-0.4175
2	rs4459739	0	123238843	A	G	0.1063	0.05513	-0.27	0.0961	0.0006809	-0.3763
11	rs3750919	0	1292831	A	G	0.05123	0.03531	-0.1914	0.0621	0.0006845	-0.24263
12	rs703558	0	103012080	C	T	0.07274	0.03276	-0.153	0.05786	0.0006856	-0.22574
8	rs3906913	0	26953801	T	C	0.02788	0.07372	0.5396	0.1315	0.0006863	0.51172
8	rs6983527	0	18460066	A	G	0.152	0.06515	-0.3004	0.1163	0.000688	-0.4524
8	rs7006635	0	138739706	A	G	-0.07227	0.02997	0.1341	0.05291	0.0006914	0.20637
5	rs7445013	0	71697977	G	A	0.0822	0.03064	-0.1262	0.05323	0.0006916	-0.2084
12	rs2074984	0	4779351	G	T	-0.02402	0.0331	0.2038	0.05845	0.0006942	0.22782
2	rs13403811	0	128319195	A	G	0.1455	0.06712	-0.3073	0.1154	0.0006953	-0.4528
12	rs7136618	0	101282227	T	C	-0.03868	0.03242	0.1839	0.05709	0.0006966	0.22258
3	rs1508207	0	42503482	T	C	-0.02134	0.03362	0.2074	0.05851	0.0006981	0.22874
4	rs722766	0	120776752	T	C	0.03679	0.036	-0.2104	0.06343	0.0007004	-0.24719
2	rs2078028	0	128264246	C	T	0.1694	0.07087	-0.3083	0.1219	0.0007051	-0.4777
1	rs10925390	0	237539667	G	A	0.08662	0.04298	-0.2058	0.07489	0.0007065	-0.29242
8	rs6558165	0	22473224	C	T	0.03235	0.08612	-0.549	0.1485	0.0007068	-0.58135
8	rs1568330	0	4065529	C	A	-0.004511	0.03242	0.2145	0.05596	0.0007071	0.219011
14	rs9322855	0	21153299	C	A	-0.02365	0.03032	0.1821	0.05263	0.0007072	0.20575
12	rs2259693	0	121457995	A	G	-0.08133	0.03021	0.1274	0.05376	0.0007124	0.20873
9	rs17262780	0	20304873	T	G	-0.06124	0.03142	0.1532	0.05503	0.0007127	0.21444
5	rs1384451	0	44419254	T	G	0.05463	0.03046	-0.1533	0.05334	0.0007135	-0.20793
1	rs12027548	0	94788768	G	A	-0.09852	0.05558	0.29	0.1005	0.0007138	0.38852
13	rs9285289	0	75045306	G	A	-0.07621	0.03124	0.1368	0.05465	0.0007157	0.21301
3	rs1021662	0	192727562	G	A	0.03701	0.03005	-0.1669	0.05226	0.0007169	-0.20391
6	rs12197625	0	163731502	A	G	-0.05532	0.05126	0.3017	0.0923	0.0007198	0.35702
1	rs2977272	0	17536952	T	C	0.03009	0.03104	-0.1836	0.05506	0.0007211	-0.21369
7	rs17211952	0	24823795	C	T	0.06543	0.04301	-0.233	0.07707	0.0007221	-0.29843
12	rs11109468	0	98784914	C	T	-0.01855	0.03017	0.1901	0.0539	0.000729	0.20865
1	rs6695464	0	236548122	C	T	0.01023	0.0434	0.3083	0.07684	0.0007322	0.29807
21	rs767055	0	24333621	G	A	0.04401	0.03071	-0.1656	0.05393	0.0007325	-0.20961
13	rs9509488	0	21594935	C	T	-0.05527	0.03235	0.1651	0.05667	0.0007332	0.22037
11	rs6421029	0	1384207	A	G	0.04306	0.03458	-0.1922	0.0605	0.000737	-0.23526
12	rs17123627	0	49635078	A	C	0.07948	0.08591	-0.5	0.1486	0.0007379	-0.57948
2	rs17029159	0	104432433	C	T	0.2106	0.09593	-0.4588	0.1736	0.0007381	-0.6694
7	rs10229964	0	1051776	G	A	0.05248	0.03018	-0.1522	0.05263	0.0007399	-0.20468
22	rs5998364	0	32664612	A	G	0.1444	0.06638	-0.3079	0.1165	0.0007437	-0.4523
9	rs7018678	0	14996243	G	A	-0.06106	0.03293	0.1647	0.05828	0.0007465	0.22576
2	rs853774	0	169813396	A	G	-0.0878	0.0338	0.1444	0.05998	0.0007465	0.2322
5	rs1025482	0	166893257	C	T	-0.04717	0.02981	0.1547	0.05191	0.0007468	0.20187
1	rs213765	0	41582006	T	G	0.0148	0.03179	-0.2028	0.05618	0.0007476	-0.2176
17	rs6505510	0	26179790	C	A	-0.0248	0.03017	0.1801	0.05277	0.000748	0.2049
3	rs6768356	0	42494635	G	T	-0.02506	0.03369	0.2035	0.05883	0.0007502	0.22856
7	rs3779537	0	126881029	G	A	0.0851	0.05965	-0.3254	0.1062	0.0007538	-0.4105
2	rs334162	0	128264431	T	C	0.1669	0.07039	-0.3064	0.1216	0.0007562	-0.4733
10	rs10764175	0	20178703	A	G	0.07367	0.03524	-0.1673	0.06228	0.0007586	-0.24097
11	rs10765947	0	12445357	A	G	-0.1263	0.05633	0.2578	0.0992	0.0007602	0.3841
1	rs7412523	0	80760473	G	A	0.06919	0.04777	-0.2541	0.08332	0.0007611	-0.32329
17	rs8067428	0	26267997	A	G	-0.03447	0.03648	0.2123	0.0636	0.000763	0.24677
2	rs6760047	0	30528297	G	A	-0.0522	0.03127	0.1593	0.05453	0.0007642	0.2115
4	rs1025748	0	154563897	G	T	-0.08878	0.03513	0.1512	0.06206	0.0007646	0.23998
11	rs716701	0	26390566	C	T	-0.05697	0.03093	0.1546	0.05473	0.0007654	0.21157
4	rs6845132	0	45139673	C	T	-0.0729	0.02991	0.131	0.0527	0.0007661	0.2039
6	rs756274	0	64505213	G	A	0.0653	0.03109	-0.1451	0.05426	0.0007673	-0.2104
7	rs4717992	0	63581769	G	A	0.06337	0.03021	-0.1431	0.05343	0.0007676	-0.20647
1	rs12752688	0	171151638	T	C	0.006498	0.04534	-0.3028	0.08002	0.0007713	-0.309298
1	rs10157478	0	238622443	T	C	0.195	0.09006	-0.418	0.1585	0.0007723	-0.613
3	rs6775887	0	164280365	T	C	-0.08989	0.04214	0.1943	0.07329	0.0007732	0.28419
13	rs11620200	0	95541884	T	C	0.05338	0.03723	-0.1984	0.06501	0.0007781	-0.25178
1	rs638072	0	77154319	A	G	0.02858	0.04761	-0.2957	0.08394	0.0007781	-0.32428
10	rs11245177	0	126178925	C	A	0.1212	0.03726	-0.1314	0.0653	0.0007806	-0.2526
12	rs1061627	0	21654407	G	A	-0.09639	0.03847	0.1637	0.06719	0.000782	0.26009
22	rs6006713	0	44652157	C	T	-0.1675	0.04993	0.1748	0.08885	0.0007854	0.3423
6	rs9353016	0	64186032	G	A	0.07056	0.03015	-0.1328	0.05256	0.0007886	-0.20336
2	rs7567615	0	109759168	T	C	-0.04165	0.04793	0.2823	0.08375	0.000789	0.32395
4	rs6537129	0	143779613	A	G	0.01371	0.03465	-0.2208	0.06069	0.0007916	-0.23451
11	rs10832483	0	1377230	C	T	0.04626	0.0346	-0.1878	0.06056	0.0007927	-0.23406
9	rs10982997	0	118662804	C	T	0.07675	0.04522	-0.231	0.0798	0.0007933	-0.30775
2	rs12465216	0	49184668	T	C	0.1411	0.05034	-0.1992	0.08806	0.0007952	-0.3403
4	rs4692553	0	169769793	T	C	-0.0406	0.03059	0.1666	0.05366	0.0007954	0.2072
5	rs12656049	0	171101874	G	A	0.06935	0.05049	-0.2787	0.09067	0.0007962	-0.34805
16	rs687852	0	22738683	A	G	0.03392	0.03066	-0.1743	0.054	0.0007989	-0.20822
21	rs1557368	0	28662012	T	C	-0.05359	0.03131	0.1609	0.0558	0.0008006	0.21449
11	rs5743899	0	1323564	C	T	-0.03266	0.03766	0.2234	0.06645	0.000801	0.25606
2	rs878461	0	128173417	C	T	0.147	0.06887	-0.3146	0.1193	0.0008036	-0.4616
9	rs187306	0	93587089	C	T	-0.1405	0.04633	0.1736	0.08148	0.0008057	0.3141
6	rs493632	0	102026214	G	A	-0.01301	0.05464	-0.3899	0.09832	0.0008065	-0.37689
20	rs4816023	0	832763	A	G	-0.09413	0.03039	0.1139	0.05415	0.000808	0.20803
2	rs4402760	0	86872835	T	G	-0.008887	0.1543	1.023	0.2665	0.0008093	1.031887
11	rs7109736	0	1381530	T	C	0.04435	0.03458	-0.1891	0.06052	0.0008097	-0.23345
11	rs7395465	0	1384920	C	T	0.04415	0.03471	-0.1897	0.06061	0.0008134	-0.23385
12	rs4765253	0	125930946	A	G	0.08579	0.03224	-0.131	0.05616	0.0008136	-0.21679
2	rs41005	0	8111231	C	T	0.04859	0.02996	-0.1558	0.05323	0.0008181	-0.20439
6	rs2051538	0	25991620	A	G	-0.04763	0.04146	0.2368	0.07422	0.0008217	0.28443
2	rs4676237	0	109706076	G	A	-0.03744	0.04947	0.2985	0.08743	0.0008258	0.33594
7	rs1972459	0	83287607	G	A	-0.03137	0.03119	0.1795	0.05485	0.0008302	0.21087
12	rs4765147	0	124857274	G	A	-0.0364	0.03128	0.1736	0.05452	0.0008332	0.21
13	rs7325885	0	25718283	G	T	-0.08047	0.02974	0.1212	0.05254	0.0008339	0.20167
5	rs396231	0	81012751	G	A	0.0923	0.033	-0.1293	0.05753	0.0008354	-0.2216
5	rs7721922	0	71756102	A	G	0.0886	0.03215	-0.1265	0.05578	0.0008356	-0.2151
19	rs10407613	0	16988786	A	G	0.06556	0.03068	-0.1398	0.05328	0.0008391	-0.20536
1	rs17111408	0	94788623	T	C	-0.09725	0.05554	0.286	0.1004	0.0008403	0.38325
8	rs7835922	0	25525396	A	G	-0.007249	0.03088	0.2009	0.05415	0.000841	0.208149
2	rs1962159	0	123627808	G	A	-0.1419	0.05226	0.2102	0.09168	0.0008468	0.3521
8	rs16897460	0	123813615	T	C	0.1032	0.07544	-0.4023	0.1314	0.0008478	-0.5055
6	rs10945799	0	162592807	C	A	-0.04662	0.03269	0.1754	0.05798	0.0008511	0.22202
2	rs6745812	0	223359365	C	T	-0.08034	0.03126	0.1297	0.05469	0.0008521	0.21004
7	rs559613	0	17499822	A	G	-0.02229	0.03355	0.2045	0.05915	0.0008542	0.22679
1	rs11590245	0	167869334	G	A	0.1412	0.05252	-0.2159	0.09337	0.0008573	-0.3571
9	rs2253112	0	130320119	C	T	0.06666	0.03275	-0.1572	0.05863	0.0008575	-0.22386
21	rs4148111	0	43648935	C	G	0.05268	0.03085	-0.1558	0.05442	0.0008604	-0.20848
10	rs7834	0	111624769	A	G	0.2518	0.1289	-0.6095	0.2241	0.0008631	-0.8613
4	rs17572286	0	23724215	G	A	0.07244	0.03048	-0.1328	0.05352	0.0008636	-0.20524
7	rs3735402	0	36340811	G	T	0.02837	0.03258	-0.19	0.05692	0.0008702	-0.21837
22	rs4821204	0	34392013	A	G	0.07004	0.03045	-0.1342	0.05328	0.0008767	-0.20424
3	rs1558323	0	43810452	G	A	-0.06579	0.02996	0.1344	0.05218	0.0008771	0.20019
11	rs11218700	0	122455520	C	T	-0.08218	0.03409	0.1486	0.06041	0.0008787	0.23078
5	rs17499927	0	166891209	T	C	-0.05237	0.03003	0.1478	0.05217	0.00088	0.20017
12	rs10778077	0	101193988	G	A	0.0175	0.0319	-0.1985	0.05657	0.0008808	-0.216
9	rs10761266	0	96524226	A	G	-0.0528	0.03297	0.1699	0.0583	0.0008819	0.2227
2	rs4676273	0	109937740	A	G	-0.04066	0.03007	0.1617	0.0529	0.0008819	0.20236
16	rs8047191	0	84988111	A	G	-0.08542	0.04236	0.2023	0.07543	0.0008824	0.28772
22	rs9610467	0	36649574	A	G	-0.03414	0.03866	0.2253	0.06776	0.0008835	0.25944
18	rs4121787	0	62894657	T	C	-0.02079	0.03014	0.1817	0.05292	0.0008845	0.20249
21	rs12482753	0	27513837	G	A	0.09674	0.09849	-0.5522	0.1685	0.0008849	-0.64894
12	rs11111302	0	102959705	T	C	-0.1319	0.04183	0.149	0.0734	0.0008854	0.2809
6	rs3024429	0	6198195	G	A	-0.1322	0.05912	0.2616	0.1027	0.000888	0.3938
2	rs17746486	0	95722609	T	C	-0.07168	0.07823	0.454	0.1375	0.0008881	0.52568
8	rs12678736	0	138749970	A	C	-0.06286	0.03	0.1397	0.05304	0.0008899	0.20256
9	rs11790258	0	94951235	T	C	-0.04956	0.04018	0.2171	0.06948	0.0008911	0.26666
1	rs1141108	0	202715284	G	A	0.0982	0.03583	-0.1417	0.06271	0.0008937	-0.2399
1	rs1888964	0	152750506	C	T	0.07058	0.03042	-0.1331	0.05325	0.0008942	-0.20368
9	rs7023772	0	73920359	T	C	0.08196	0.0414	-0.1947	0.07227	0.0008967	-0.27666
10	rs7342064	0	35099799	A	G	-0.1125	0.03555	0.1264	0.06258	0.0008985	0.2389
9	rs10123342	0	95087824	G	T	0.003697	0.03198	0.2182	0.05614	0.0008992	0.214503
12	rs10860654	0	101281701	G	A	-0.03754	0.03241	0.1802	0.05702	0.0008995	0.21774
9	rs7859597	0	15075185	G	A	-0.01807	0.03364	0.2101	0.05997	0.0009034	0.22817
7	rs10272099	0	1016948	C	T	-0.00717	0.03212	-0.2215	0.05607	0.0009088	-0.21433
4	rs12640417	0	27793744	G	T	-0.0273	0.042	0.2528	0.07327	0.0009114	0.2801
6	rs7746671	0	146944800	T	C	0.01908	0.03691	-0.2287	0.06498	0.000914	-0.24778
1	rs12407601	0	64870457	G	A	-0.09719	0.05634	0.2743	0.09683	0.0009144	0.37149
18	rs12959120	0	63779318	C	T	-0.05169	0.03469	0.182	0.06136	0.0009179	0.23369
21	rs12481805	0	43562899	A	G	0.06943	0.0332	-0.1535	0.0585	0.0009183	-0.22293
2	rs2111073	0	8099955	C	T	0.04871	0.03187	-0.1647	0.05594	0.0009199	-0.21341
3	rs11130237	0	50039303	G	A	0.132	0.05376	-0.2232	0.09275	0.0009229	-0.3552
1	rs6664230	0	224429078	G	A	-0.05111	0.04222	0.2344	0.07518	0.0009275	0.28551
21	rs244183	0	24342754	T	C	0.04365	0.03089	-0.1629	0.0542	0.0009315	-0.20655
5	rs11747116	0	150427285	C	T	-0.03143	0.03049	0.1716	0.05323	0.0009328	0.20303
9	rs1380	0	95147434	T	C	-0.05403	0.04756	0.2584	0.08157	0.0009355	0.31243
2	rs6753101	0	8104849	T	G	0.0482	0.03006	-0.1544	0.05335	0.0009387	-0.2026
18	rs7240472	0	63842563	T	G	-0.0495	0.03473	0.184	0.06144	0.0009395	0.2335
4	rs1457402	0	180133742	T	C	0.1426	0.05395	-0.2225	0.09629	0.0009413	-0.3651
3	rs1865395	0	10666072	T	C	0.1177	0.03691	-0.1314	0.06566	0.0009435	-0.2491
5	rs7710292	0	71741790	C	T	-0.08291	0.03067	0.1219	0.05383	0.0009443	0.20481
1	rs12756783	0	21026961	C	T	0.04786	0.08658	-0.5382	0.1546	0.0009445	-0.58606
10	rs3847452	0	89300314	G	A	0.07646	0.03903	-0.184	0.06845	0.0009486	-0.26046
15	rs11073138	0	36291093	T	C	-0.03555	0.04112	0.238	0.07182	0.0009492	0.27355
19	rs10415034	0	16945205	A	G	0.07867	0.03001	-0.1203	0.0522	0.0009494	-0.19897
13	rs1335842	0	83017730	C	T	-0.03518	0.03263	0.1819	0.057	0.0009517	0.21708
7	rs10274367	0	1117436	C	T	0.08841	0.03125	-0.1194	0.05458	0.0009526	-0.20781
7	rs10479843	0	4283769	G	A	0.05217	0.03168	-0.1605	0.05603	0.0009548	-0.21267
9	rs7848206	0	112104315	T	C	0.0238	0.03358	-0.2016	0.05943	0.000958	-0.2254
9	rs2134860	0	73920739	C	A	0.08179	0.04109	-0.1907	0.07154	0.0009581	-0.27249
8	rs17624390	0	16735361	C	T	-0.03645	0.0491	0.2938	0.08712	0.0009592	0.33025
8	rs10106054	0	16991254	G	A	0.05571	0.03325	-0.168	0.05902	0.0009602	-0.22371
22	rs714022	0	46175530	C	A	0.04382	0.03083	-0.1608	0.05376	0.0009602	-0.20462
2	rs1226993	0	230103927	A	G	0.08282	0.03197	-0.1291	0.0557	0.000966	-0.21192
1	rs1281610	0	82896475	G	A	-0.09089	0.03131	0.1188	0.05529	0.0009664	0.20969
16	rs6497608	0	22806934	A	G	0.0703	0.03693	-0.1763	0.06495	0.0009665	-0.2466
4	rs13108163	0	27742689	G	A	0.05785	0.0315	-0.154	0.05597	0.0009685	-0.21185
7	rs7792486	0	50486309	C	T	0.1602	0.07693	-0.3322	0.1279	0.0009701	-0.4924
16	rs2581322	0	86344426	C	T	0.06551	0.03216	-0.1474	0.05597	0.0009709	-0.21291
5	rs17331955	0	94108923	C	T	-0.02908	0.04985	0.3011	0.08681	0.000972	0.33018
2	rs7570609	0	128289963	C	A	0.1429	0.06707	-0.2974	0.1155	0.000975	-0.4403
13	rs2026167	0	82981685	T	C	-0.02964	0.03215	0.1835	0.05609	0.0009777	0.21314
2	rs378492	0	79293342	T	G	-0.04605	0.03118	0.1627	0.0551	0.0009779	0.20875
4	rs17590869	0	69050703	A	G	-0.112	0.0477	0.2022	0.08252	0.0009783	0.3142
1	rs2339381	0	152753798	C	T	0.07079	0.03045	-0.1315	0.05329	0.0009791	-0.20229
16	rs8056745	0	22809976	G	A	0.07228	0.03693	-0.1741	0.065	0.0009801	-0.24638
1	rs11208446	0	64868352	A	G	-0.09582	0.05229	0.248	0.09028	0.0009836	0.34382
8	rs17775880	0	62279368	A	G	-0.08044	0.02995	0.1196	0.05282	0.0009841	0.20004
18	rs4392155	0	43245684	C	T	-0.05124	0.0411	0.2243	0.07283	0.0009853	0.27554
6	rs229919	0	134229319	A	G	-0.05194	0.03512	0.1809	0.06132	0.0009856	0.23284
11	rs11219139	0	123308082	T	C	0.06208	0.03604	-0.1813	0.06451	0.0009893	-0.24338
1	rs12129523	0	76129223	A	C	-0.03256	0.03306	0.1863	0.05768	0.000992	0.21886
8	rs2658913	0	56281600	A	G	0.05531	0.04674	-0.2582	0.08295	0.0009926	-0.31351
12	rs1060126	0	21654831	G	T	-0.09375	0.03864	0.1626	0.06758	0.0009927	0.25635
6	rs17086159	0	155643733	C	T	0.07312	0.06534	-0.3649	0.1159	0.0009946	-0.43802
7	rs6461674	0	22902620	C	T	0.1031	0.03018	-0.09809	0.05314	0.0009959	-0.20119
8	rs10090988	0	29937404	G	A	-0.07161	0.04046	0.1943	0.06991	0.0009968	0.26591
21	rs225448	0	43659830	C	T	0.0532	0.03079	-0.1525	0.05438	0.0009981	-0.2057
3	rs7641978	0	160328337	C	A	-0.09767	0.04611	0.2133	0.0825	0.0009989	0.31097
5	rs16878635	0	71747448	T	C	0.02013	0.04114	-0.2526	0.07193	0.0009994	-0.27273
6	rs9353857	0	92289144	T	C	-0.05784	0.03201	0.1554	0.05635	0.0009996	0.21324
18	rs1144081	0	50087903	C	T	0.05427	0.03549	-0.1813	0.0622	0.001005	-0.23557
21	rs881395	0	43652410	T	C	0.04626	0.03173	-0.1655	0.05602	0.001005	-0.21176
16	rs9939858	0	9677897	T	C	-0.1589	0.05892	0.2338	0.1038	0.001006	0.3927
8	rs1264866	0	102859307	A	C	0.0355	0.03526	-0.1983	0.06172	0.001007	-0.2338
1	rs4345854	0	234221302	A	G	0.0691	0.04221	-0.2065	0.07242	0.001008	-0.2756
1	rs7524281	0	152783255	A	C	0.07418	0.03154	-0.1346	0.05512	0.001008	-0.20878
5	rs17062286	0	163216963	T	C	0.1507	0.1177	-0.6121	0.2	0.00101	-0.7628
15	rs2899666	0	61355256	C	T	-0.07212	0.032	0.1419	0.05667	0.00101	0.21402
7	rs3808350	0	1125893	G	A	0.06812	0.0308	-0.1349	0.05353	0.001011	-0.20302
5	rs10043368	0	71743322	G	A	-0.0832	0.03066	0.1204	0.05382	0.001012	0.2036
11	rs4319473	0	46702691	A	G	0.04486	0.04079	-0.2288	0.07258	0.001012	-0.27366
18	rs2160913	0	8716090	C	A	-0.1079	0.03408	0.1174	0.05948	0.001015	0.2253
20	rs1002762	0	58580885	G	A	0.06571	0.03764	-0.1827	0.06556	0.001016	-0.24841
12	rs1398599	0	71135522	T	G	-0.07618	0.03899	0.186	0.06961	0.001017	0.26218
4	rs12640145	0	45102488	T	C	-0.08006	0.03793	0.1743	0.0675	0.001018	0.25436
12	rs1317662	0	124867608	A	G	-0.03314	0.03027	0.1665	0.0527	0.001018	0.19964
12	rs10773802	0	131092583	A	G	0.01927	0.03546	-0.2134	0.06136	0.001025	-0.23267
5	rs11747787	0	150426868	A	C	-0.03331	0.03048	0.1682	0.05327	0.001026	0.20151
17	rs884250	0	4351640	G	A	-0.09249	0.04888	0.227	0.08414	0.001026	0.31949
11	rs3907015	0	84725828	T	C	-0.05061	0.02989	0.1488	0.05287	0.001028	0.19941
11	rs4586161	0	23816444	G	A	0.06295	0.03452	-0.1661	0.06064	0.001028	-0.22905
8	rs870002	0	62220151	T	C	-0.08132	0.03089	0.1236	0.05429	0.001036	0.20492
13	rs9634435	0	27569014	A	G	0.09111	0.03146	-0.1181	0.05547	0.001036	-0.20921
6	rs9392757	0	6204341	A	G	-0.185	0.06649	0.2522	0.1155	0.001039	0.4372
1	rs3904695	0	182740955	G	A	0.08274	0.03327	-0.138	0.0585	0.001041	-0.22074
16	rs7199337	0	78798760	T	C	-0.06014	0.03398	0.1664	0.06014	0.001042	0.22654
2	rs777567	0	128212588	T	G	0.1851	0.07934	-0.3322	0.1364	0.001042	-0.5173
5	rs11743522	0	52835755	T	C	-0.121	0.04957	0.2084	0.08739	0.001043	0.3294
8	rs7003503	0	17181772	G	T	-0.0911	0.03861	0.1695	0.06948	0.001043	0.2606
3	rs357125	0	13337476	A	G	0.06734	0.03057	-0.1366	0.0542	0.001046	-0.20394
19	rs11671121	0	16967738	T	C	0.07689	0.03003	-0.1213	0.05247	0.001047	-0.19819
12	rs2446990	0	49187450	G	A	-0.04183	0.03039	0.1619	0.05422	0.00105	0.20373
4	rs6857940	0	93998463	G	A	-0.03791	0.03178	0.1736	0.05619	0.001051	0.21151
8	rs1399058	0	9710822	G	A	0.03693	0.1316	0.9481	0.245	0.001052	0.91117
13	rs17748108	0	77408426	C	T	-0.06638	0.04384	0.2202	0.07574	0.001057	0.28658
1	rs1251567	0	76453857	T	G	-0.0402	0.03107	0.165	0.05442	0.001059	0.2052
10	rs11188410	0	97396561	A	C	-0.01677	0.05907	0.377	0.1048	0.00106	0.39377
2	rs167164	0	123564927	T	C	0.07213	0.04011	-0.1945	0.0709	0.001061	-0.26663
11	rs876701	0	46370767	G	A	0.06117	0.03935	-0.2007	0.06965	0.001061	-0.26187
6	rs9343931	0	80436297	T	C	0.08234	0.03239	-0.1302	0.05626	0.001061	-0.21254
12	rs703549	0	102945701	G	T	-0.1432	0.04394	0.1496	0.07793	0.001062	0.2928
1	rs7529169	0	106988405	G	A	0.1713	0.124	-0.6563	0.2203	0.001062	-0.8276
3	rs6549213	0	69421910	G	A	-0.1403	0.04603	0.1727	0.08381	0.001063	0.313
10	rs7086917	0	50197435	G	T	0.06273	0.02991	-0.1351	0.05253	0.001063	-0.19783
6	rs1149316	0	105756525	T	C	0.07624	0.06713	-0.3708	0.1189	0.001064	-0.44704
1	rs203848	0	167849327	A	G	0.1243	0.05339	-0.2356	0.0961	0.001064	-0.3599
3	rs4687800	0	51476387	A	G	-0.0729	0.04145	0.197	0.07128	0.001064	0.2699
4	rs7663070	0	142255485	G	A	-0.1043	0.06748	0.3371	0.1168	0.001064	0.4414
8	rs2294143	0	8413380	A	G	-0.03201	0.03021	0.1683	0.05325	0.001072	0.20031
5	rs10074999	0	111139696	C	T	-0.01731	0.03599	0.2239	0.06439	0.001074	0.24121
8	rs2001445	0	8407886	G	A	-0.02597	0.03006	0.1731	0.05294	0.001075	0.19907
11	rs494608	0	63143681	T	C	0.04937	0.03323	-0.1699	0.05823	0.001075	-0.21927
20	rs6067967	0	50466232	C	T	-0.02318	0.03134	0.1839	0.05505	0.001077	0.20708
3	rs16865892	0	190522579	C	T	-0.07211	0.04293	0.2108	0.07515	0.00108	0.28291
1	rs11811628	0	212756393	A	G	-0.07037	0.08803	0.5355	0.1631	0.001081	0.60587
2	rs6711198	0	49187452	A	C	0.1318	0.05004	-0.1974	0.08739	0.001081	-0.3292
22	rs695537	0	43769871	G	A	0.003109	0.0334	0.2257	0.05934	0.001081	0.222591
6	rs1150593	0	11661269	T	G	0.07834	0.05105	-0.2601	0.09012	0.001083	-0.33844
20	rs660526	0	19506255	A	G	0.03447	0.03742	-0.2144	0.06635	0.001084	-0.24887
4	rs4692256	0	27744718	C	T	0.03932	0.02963	-0.1592	0.05304	0.001088	-0.19852
2	rs6742013	0	136169799	C	T	-0.06182	0.02493	0.1018	0.04345	0.001089	0.16362
1	rs11164042	0	76178440	A	G	-0.03415	0.03306	0.183	0.05767	0.00109	0.21715
12	rs2141859	0	104899981	C	A	0.01129	0.02984	-0.1863	0.05263	0.001093	-0.19759
8	rs3901290	0	125702761	C	T	0.1325	0.04479	-0.1601	0.07763	0.001094	-0.2926
5	rs4866058	0	20626297	A	C	0.11	0.06378	-0.3227	0.1162	0.001095	-0.4327
6	rs9277052	0	33005932	C	T	0.08028	0.03658	-0.1612	0.06429	0.001097	-0.24148
9	rs4242599	0	91669947	A	G	0.08996	0.04604	-0.2148	0.08121	0.001098	-0.30476
8	rs11785226	0	53680808	C	T	-0.06064	0.02983	0.1375	0.05289	0.001099	0.19814
12	rs12322708	0	59305508	C	T	-0.1241	0.09539	0.5211	0.1732	0.0011	0.6452
1	rs17416878	0	16446980	G	A	-0.1134	0.03394	0.1112	0.05988	0.001101	0.2246
1	rs17047682	0	218523025	G	A	0.01673	0.06433	0.4418	0.1133	0.001102	0.42507
1	rs12090849	0	76400261	C	T	0.0848	0.03522	-0.145	0.061	0.001103	-0.2298
13	rs9556428	0	95548547	A	G	0.04775	0.03686	-0.1956	0.06484	0.001103	-0.24335
9	rs1081767	0	93586759	C	T	-0.1391	0.04632	0.1666	0.08149	0.001113	0.3057
20	rs6118380	0	8892600	T	C	-0.02597	0.03304	0.1924	0.05825	0.001114	0.21837
18	rs7232315	0	55566232	C	T	0.0663	0.03344	-0.1569	0.05974	0.001114	-0.2232
11	rs11235468	0	71923542	G	T	-0.1143	0.04694	0.194	0.08211	0.001116	0.3083
6	rs6931774	0	164142124	G	A	-0.03382	0.03043	0.1656	0.05309	0.001116	0.19942
4	rs7673358	0	150662409	A	G	-0.08005	0.05553	0.2833	0.09668	0.001118	0.36335
6	rs9383745	0	155539010	C	T	-0.02442	0.06549	-0.4526	0.1139	0.001119	-0.42818
9	rs4876968	0	91726877	A	G	0.05259	0.04519	-0.2475	0.08031	0.001128	-0.30009
9	rs11793122	0	94949715	A	G	-0.04666	0.04007	0.2138	0.06925	0.001129	0.26046
4	rs10014396	0	90712629	C	T	-0.06702	0.02597	0.1049	0.04596	0.00113	0.17192
13	rs9556427	0	95547691	A	G	0.04237	0.03551	-0.192	0.06263	0.00113	-0.23437
8	rs4739981	0	84736781	T	G	-0.04579	0.04165	0.2319	0.07445	0.001135	0.27769
2	rs2241536	0	231443924	C	T	-0.09147	0.04096	0.1764	0.0714	0.001136	0.26787
1	rs1770882	0	76411549	A	G	-0.02662	0.03387	0.1943	0.05882	0.001137	0.22092
9	rs2226014	0	1342763	T	C	-0.04585	0.03092	0.1576	0.05434	0.001137	0.20345
9	rs7034019	0	128965556	G	T	0.0801	0.06059	-0.3271	0.1095	0.001137	-0.4072
8	rs11987584	0	5410407	T	C	0.04731	0.03336	-0.1726	0.05879	0.001138	-0.21991
1	rs758518	0	117081810	G	A	0.1192	0.04901	-0.1985	0.08444	0.001139	-0.3177
12	rs17581242	0	116844438	G	T	-0.03561	0.04345	0.2479	0.07554	0.00114	0.28351
9	rs13289619	0	139936141	A	G	-0.06673	0.06304	0.3455	0.1099	0.001141	0.41223
4	rs9307257	0	102396292	G	A	-0.05611	0.03017	0.1422	0.05297	0.001144	0.19831
2	rs17741435	0	28780383	T	C	0.02261	0.03897	-0.2285	0.06667	0.001145	-0.25111
5	rs12153735	0	113788755	T	C	-0.03489	0.03109	0.1698	0.05474	0.001146	0.20469
7	rs1534151	0	45984645	G	A	0.04066	0.03206	-0.1696	0.05616	0.001146	-0.21026
7	rs7802493	0	138699590	C	T	-0.1896	0.07523	0.3089	0.1336	0.001146	0.4985
2	rs6436859	0	230197262	A	G	-0.05217	0.03755	0.1959	0.06641	0.001147	0.24807
11	rs4937722	0	132672291	G	T	-0.08406	0.03544	0.1494	0.06245	0.001148	0.23346
11	rs7123002	0	132992699	A	G	-0.1735	0.06671	0.2669	0.1179	0.001149	0.4404
21	rs2834930	0	36777974	C	T	0.06426	0.03023	-0.1332	0.05266	0.00115	-0.19746
9	rs3957512	0	96612770	G	A	-0.06327	0.03226	0.1498	0.05706	0.00115	0.21307
2	rs3761656	0	163011235	G	T	-0.02461	0.06039	0.3741	0.1067	0.001151	0.39871
10	rs716829	0	20267705	T	C	-0.1077	0.03377	0.1152	0.0597	0.001152	0.2229
1	rs6424914	0	183813858	T	G	-0.0253	0.05555	0.3367	0.09654	0.001153	0.362
7	rs17756186	0	51375461	T	C	0.01414	0.02991	-0.1843	0.05323	0.001154	-0.19844
5	rs2560302	0	121428395	G	A	-0.04167	0.03194	0.1689	0.05638	0.001154	0.21057
2	rs11673795	0	103215935	T	C	-0.01217	0.03068	0.1893	0.05389	0.001155	0.20147
10	rs10749586	0	90202441	G	T	-0.00316	0.03002	-0.2022	0.05338	0.001156	-0.19904
10	rs12571521	0	118412310	G	T	-0.07214	0.03025	0.1261	0.05298	0.001156	0.19824
18	rs2162256	0	72122611	A	G	0.006791	0.02966	0.2016	0.05212	0.001156	0.194809
11	rs4465371	0	67280620	G	A	0.005286	0.0305	0.2052	0.05344	0.001157	0.199914
9	rs7852279	0	112105331	T	C	0.0216	0.03352	-0.1999	0.05934	0.001157	-0.2215
1	rs2662918	0	225036472	G	T	0.03219	0.03866	-0.2198	0.06724	0.00116	-0.25199
2	rs1429362	0	141737664	A	C	-0.09203	0.03515	0.1411	0.06258	0.001161	0.23313
12	rs300457	0	78615141	G	A	-0.0831	0.04829	0.2354	0.08535	0.001164	0.3185
6	rs12192110	0	153640499	T	G	-0.08693	0.03249	0.1282	0.05773	0.001166	0.21513
8	rs1001812	0	131498180	T	C	0.05253	0.03036	-0.1468	0.05339	0.001168	-0.19933
7	rs2337377	0	154145593	T	C	-0.07026	0.03136	0.1363	0.05535	0.001168	0.20656
20	rs6046170	0	19527223	G	T	-0.02393	0.03091	0.1789	0.05433	0.001175	0.20283
4	rs7441080	0	13788219	A	G	-0.06795	0.0421	0.2106	0.07483	0.001176	0.27855
7	rs12719052	0	51376184	T	C	0.01239	0.02993	-0.1858	0.05327	0.00118	-0.19819
1	rs3196669	0	202733238	C	T	0.09214	0.03579	-0.1416	0.06258	0.001183	-0.23374
10	rs7083956	0	32450551	A	C	0.04958	0.04205	-0.2255	0.07365	0.001183	-0.27508
11	rs7926982	0	74404218	T	C	-0.09228	0.0311	0.1127	0.05505	0.001185	0.20498
6	rs9294508	0	92256169	T	C	-0.05734	0.0321	0.1529	0.05636	0.00119	0.21024
18	rs12605855	0	3330062	A	G	0.01312	0.03772	0.2576	0.06531	0.001191	0.24448
3	rs12054089	0	81691855	C	A	-0.1753	0.09366	0.4578	0.1716	0.001201	0.6331
18	rs1228469	0	50142425	G	A	0.06276	0.03595	-0.1723	0.06306	0.001201	-0.23506
12	rs7302664	0	4664821	T	C	0.07633	0.04792	-0.2401	0.08515	0.001203	-0.31643
20	rs6038292	0	5782124	A	C	-0.1744	0.04778	0.1407	0.08478	0.001205	0.3151
4	rs9312527	0	173637709	G	A	-0.05299	0.04723	0.258	0.08365	0.001205	0.31099
7	rs10282247	0	25078543	C	T	-0.05493	0.03847	0.1943	0.06669	0.001206	0.24923
10	rs914320	0	24848149	G	A	-0.03929	0.03208	0.1676	0.05527	0.001206	0.20689
2	rs563694	0	169774071	C	A	0.0642	0.03095	-0.1393	0.05471	0.001208	-0.2035
11	rs4589296	0	23780120	G	A	0.06231	0.02974	-0.1331	0.05257	0.001218	-0.19541
9	rs10975612	0	6508149	C	A	-0.1006	0.06101	0.2965	0.1065	0.001219	0.3971
12	rs11109469	0	98785766	T	C	-0.1128	0.05663	0.2548	0.09856	0.001219	0.3676
4	rs10012720	0	151772410	G	A	0.04241	0.0297	-0.153	0.05261	0.001221	-0.19541
11	rs11604662	0	67268048	A	G	-0.001457	0.03152	0.2044	0.05532	0.001226	0.205857
4	rs6847037	0	11507052	G	T	-0.001045	0.03244	-0.2134	0.05713	0.001226	-0.212355
6	rs6905421	0	159117018	G	A	0.059	0.03005	-0.1362	0.05238	0.001228	-0.1952
16	rs4783187	0	85415838	T	C	-0.05687	0.04625	0.2446	0.08104	0.001232	0.30147
3	rs6776560	0	21491425	A	C	-0.1582	0.05744	0.2124	0.09928	0.001232	0.3706
4	rs4916640	0	11507454	A	C	-0.0006873	0.03247	-0.213	0.05712	0.001234	-0.2123127
11	rs1128334	0	128328959	T	C	0.03077	0.05	-0.299	0.089	0.001238	-0.32977
5	rs702077	0	171214479	A	G	0.1863	0.1408	-0.7175	0.2418	0.001238	-0.9038
3	rs13067306	0	94243713	A	G	-0.0283	0.03642	0.2093	0.06393	0.00124	0.2376
4	rs17045969	0	166030858	T	C	-0.09257	0.08183	0.4373	0.1422	0.00124	0.52987
1	rs1889587	0	44005928	G	A	-0.08819	0.05597	0.2757	0.09779	0.00124	0.36389
1	rs12044865	0	14853297	G	A	-0.07626	0.0298	0.1184	0.05241	0.001241	0.19466
11	rs3781659	0	70002886	C	T	-0.0521	0.04392	0.2386	0.07858	0.001241	0.2907
10	rs4745765	0	76873606	C	T	0.112	0.06993	-0.3302	0.1177	0.001243	-0.4422
13	rs1571513	0	103689469	C	T	-0.06897	0.03943	0.19	0.06986	0.001244	0.25897
7	rs13312060	0	36547979	A	G	0.01402	0.03009	-0.1805	0.05221	0.001245	-0.19452
7	rs536299	0	83267983	A	C	-0.01693	0.03113	0.1869	0.05491	0.001245	0.20383
2	rs11888552	0	46468276	T	C	-0.04502	0.0568	0.3252	0.09964	0.001246	0.37022
14	rs2109750	0	74671256	A	G	-0.03914	0.0298	0.1548	0.05218	0.001248	0.19394
1	rs2275364	0	21938375	G	T	0.08936	0.03138	-0.1151	0.05503	0.001249	-0.20446
4	rs16879791	0	27795958	T	C	-0.04523	0.04042	0.2159	0.07008	0.00125	0.26113
12	rs2701818	0	128413153	C	T	0.2241	0.1001	-0.4274	0.1753	0.00125	-0.6515
20	rs2423566	0	11523814	G	A	-0.01439	0.03124	-0.2185	0.05501	0.001252	-0.20411
8	rs12543013	0	70542298	G	A	-0.03162	0.03072	0.168	0.0537	0.001254	0.19962
17	rs7215873	0	63734166	G	A	-0.03979	0.05234	0.3044	0.09301	0.001258	0.34419
6	rs9494868	0	138132445	G	T	0.09572	0.03606	-0.1407	0.06383	0.00126	-0.23642
4	rs11944404	0	145670871	C	T	-0.03849	0.03022	-0.235	0.05291	0.001262	-0.19651
8	rs7460543	0	980635	T	C	-0.0213	0.03526	0.2078	0.06169	0.001263	0.2291
7	rs6957048	0	30889617	G	T	-0.05907	0.04098	0.208	0.07202	0.001269	0.26707
13	rs4885981	0	53364443	C	T	-0.02838	0.03081	0.1725	0.0542	0.001272	0.20088
12	rs11058197	0	125968344	A	G	0.09263	0.03254	-0.1186	0.05693	0.001274	-0.21123
7	rs2285689	0	24874499	T	C	0.05913	0.03412	-0.1629	0.05987	0.001274	-0.22203
5	rs12658867	0	36142648	G	A	0.03855	0.03029	-0.1583	0.05306	0.001275	-0.19685
4	rs1511294	0	93994938	A	C	-0.01886	0.0312	0.1849	0.05504	0.001278	0.20376
7	rs2075067	0	44263028	A	C	0.1412	0.04584	-0.1623	0.08232	0.001278	-0.3035
1	rs10915976	0	226521979	C	A	0.03266	0.02991	-0.1621	0.05256	0.001279	-0.19476
3	rs28350	0	42418446	A	G	0.03934	0.03908	-0.2166	0.06919	0.001279	-0.25594
5	rs11742901	0	3429107	T	C	0.1364	0.04421	-0.1513	0.07763	0.001282	-0.2877
1	rs17457661	0	12436898	G	A	-0.02586	0.03801	0.2214	0.06672	0.001282	0.24726
7	rs17809941	0	77837900	A	G	0.04711	0.03481	-0.1814	0.06186	0.001283	-0.22851
11	rs1894224	0	126821306	T	C	0.09884	0.04383	-0.1915	0.07881	0.001284	-0.29034
12	rs10778078	0	101195088	A	G	0.01651	0.03187	-0.1922	0.05646	0.001287	-0.20871
1	rs7556176	0	24418768	C	T	-0.05445	0.0301	0.1408	0.05268	0.001289	0.19525
13	rs500755	0	21520471	A	G	-0.02972	0.03698	0.2119	0.06535	0.001294	0.24162
5	rs306076	0	110656694	T	G	0.09035	0.04181	-0.1781	0.07221	0.001295	-0.26845
9	rs1411381	0	27707461	T	G	0.03896	0.03314	-0.177	0.05839	0.001297	-0.21596
11	rs556730	0	63142877	A	G	0.038	0.0322	-0.171	0.05643	0.001297	-0.209
12	rs609728	0	101375646	T	C	0.04975	0.03287	-0.165	0.05812	0.001297	-0.21475
3	rs357111	0	13325922	A	G	0.06542	0.0302	-0.133	0.05379	0.001298	-0.19842
3	rs4687569	0	51432895	T	C	-0.091	0.04242	0.1789	0.0724	0.001298	0.2699
2	rs16840903	0	139394256	A	G	0.03381	0.09471	-0.5771	0.1646	0.001299	-0.61091
11	rs11228530	0	68918985	C	A	0.117	0.06272	-0.2922	0.1107	0.0013	-0.4092
3	rs1218626	0	116974370	T	C	0.005748	0.03305	0.2228	0.05883	0.001301	0.217052
12	rs2302629	0	96387621	A	G	0.0866	0.03126	-0.1154	0.05448	0.001301	-0.202
16	rs4378601	0	83084131	C	A	-0.03521	0.07078	0.4278	0.1254	0.001302	0.46301
3	rs4456888	0	104078453	G	T	0.04125	0.03019	-0.1545	0.0529	0.001309	-0.19575
22	rs9615662	0	48295349	G	A	-0.01143	0.04142	0.2556	0.07205	0.001313	0.26703
2	rs11676712	0	235646122	A	G	0.04942	0.03081	-0.15	0.05387	0.001315	-0.19942
12	rs12308699	0	39187408	C	T	0.1033	0.1123	-0.6194	0.195	0.001315	-0.7227
13	rs16968712	0	107127784	C	T	0.07892	0.03841	-0.1715	0.06783	0.001315	-0.25042
3	rs2204039	0	36694732	A	C	0.07436	0.03639	-0.164	0.06469	0.00132	-0.23836
3	rs11921628	0	149787516	G	T	0.1042	0.04173	-0.1675	0.07358	0.001321	-0.2717
6	rs17086046	0	155519888	A	G	-0.02309	0.06747	-0.4593	0.118	0.001326	-0.43621
4	rs16879845	0	27826209	G	A	-0.04189	0.05082	0.2794	0.08625	0.001328	0.32129
6	rs2207369	0	80442333	C	T	-0.02162	0.03044	0.1758	0.05344	0.001329	0.19742
4	rs1946731	0	142247487	C	A	-0.08992	0.06734	0.3409	0.1161	0.001331	0.43082
6	rs56237	0	155632762	C	T	0.1027	0.06156	-0.3016	0.1099	0.001334	-0.4043
2	rs16837959	0	202531624	G	A	-0.03219	0.04263	0.2428	0.07437	0.001335	0.27499
1	rs10493633	0	80454564	T	C	-0.04044	0.03227	0.169	0.05675	0.001336	0.20944
3	rs33500	0	42427191	C	T	0.03362	0.03837	-0.2177	0.06829	0.001338	-0.25132
6	rs6906460	0	25977361	A	T	-0.04141	0.04152	0.2315	0.07425	0.001339	0.27291
16	rs2326458	0	84987679	C	A	-0.05226	0.03431	0.1718	0.06086	0.00134	0.22406
3	rs3821733	0	21483086	A	G	-0.111	0.038	0.133	0.06591	0.00134	0.244
15	rs2567458	0	96341849	G	A	-0.01476	0.03337	0.2001	0.05808	0.001341	0.21486
3	rs13061181	0	190519325	G	T	0.003009	0.06332	-0.3958	0.107	0.001343	-0.398809
5	rs6897820	0	117919968	C	T	0.02188	0.08383	-0.524	0.1482	0.001344	-0.54588
3	rs1465365	0	187072716	C	T	-0.0664	0.04095	0.1988	0.07185	0.001345	0.2652
1	rs12024761	0	187866906	A	G	-0.07131	0.0309	0.1279	0.05392	0.001346	0.19921
7	rs10954712	0	82761117	A	G	0.08942	0.03438	-0.1325	0.06008	0.001347	-0.22192
9	rs12351676	0	96526835	T	C	-0.05125	0.03295	0.1634	0.05828	0.001347	0.21465
6	rs3734899	0	168457966	A	G	0.06701	0.03129	-0.1355	0.05489	0.001348	-0.20251
6	rs4714684	0	43396856	C	A	-0.08477	0.02972	0.1091	0.05267	0.001348	0.19387
8	rs7820620	0	136203934	C	T	-0.006058	0.03256	-0.2172	0.05725	0.001349	-0.211142
18	rs176121	0	62807636	T	C	-0.04641	0.03097	0.1546	0.05455	0.001352	0.20101
9	rs4548277	0	14993419	G	T	-0.06104	0.03289	0.1529	0.05812	0.001355	0.21394
9	rs17787855	0	79526812	T	C	0.1366	0.05019	-0.1836	0.08646	0.001358	-0.3202
10	rs7903366	0	53689774	T	C	-0.05593	0.0349	0.1689	0.06089	0.001358	0.22483
6	rs3800489	0	64411814	G	A	0.07035	0.03147	-0.1333	0.05524	0.00136	-0.20365
14	rs3762903	0	36791410	G	A	-0.0616	0.03263	0.1477	0.05663	0.001363	0.2093
18	rs1675217	0	50137957	G	T	0.06354	0.03605	-0.1695	0.06321	0.001364	-0.23304
14	rs3212247	0	24809795	G	A	-0.02467	0.05828	0.3634	0.1063	0.001364	0.38807
16	rs42295	0	83853095	G	A	0.03867	0.03132	-0.1643	0.05512	0.001365	-0.20297
20	rs637027	0	19499858	C	T	0.04228	0.03698	-0.1988	0.06558	0.001366	-0.24108
1	rs11583685	0	4232794	C	T	-0.03778	0.04066	0.2253	0.07141	0.001368	0.26308
2	rs1592	0	135722143	A	C	0.07751	0.02575	-0.08793	0.04482	0.001371	-0.16544
7	rs3808095	0	127364960	G	A	0.02463	0.03038	-0.1714	0.0532	0.001372	-0.19603
6	rs574716	0	5491723	C	T	0.02661	0.03195	-0.1799	0.05607	0.001377	-0.20651
2	rs7562875	0	105697068	G	A	0.04637	0.04175	-0.2257	0.07407	0.001377	-0.27207
3	rs10511148	0	94146460	C	T	0.01222	0.03504	0.2385	0.06145	0.001378	0.22628
2	rs955681	0	142047759	C	T	0.0569	0.03476	-0.1654	0.06016	0.001378	-0.2223
3	rs4611808	0	51469107	C	T	-0.09064	0.04394	0.1865	0.07467	0.001379	0.27714
13	rs17060867	0	40602730	C	T	0.3577	0.1413	-0.4909	0.2246	0.00138	-0.8486
10	rs10828672	0	24847361	T	C	-0.03971	0.032	0.1642	0.05515	0.001383	0.20391
7	rs12673911	0	51375641	A	G	0.01218	0.0299	-0.183	0.05321	0.001388	-0.19518
21	rs2830895	0	28753241	T	C	-0.04033	0.02975	0.1539	0.05297	0.001388	0.19423
2	rs10865489	0	88446892	G	T	-0.04702	0.03333	0.1677	0.05832	0.001389	0.21472
4	rs2615973	0	102515133	T	G	0.09043	0.03016	-0.1058	0.05347	0.001391	-0.19623
14	rs12434293	0	98503520	A	G	-0.1019	0.04869	0.2095	0.08441	0.001393	0.3114
4	rs4306991	0	45068593	T	C	-0.0818	0.03803	0.1665	0.06773	0.001393	0.2483
1	rs12094497	0	161186303	A	G	-0.01178	0.04882	0.3083	0.08748	0.001397	0.32008
4	rs1503540	0	120812306	T	C	0.03871	0.03465	-0.185	0.06084	0.001399	-0.22371
8	rs8180912	0	11639991	T	C	-0.004468	0.03804	-0.2534	0.06801	0.001399	-0.248932
6	rs483222	0	163555157	G	A	-0.03287	0.04111	0.2275	0.07039	0.001401	0.26037
11	rs7931462	0	92784203	A	G	0.2752	0.1074	-0.4267	0.1917	0.001401	-0.7019
9	rs10756657	0	15340686	C	T	0.06316	0.0403	-0.1984	0.07129	0.001402	-0.26156
18	rs7245331	0	57222484	G	A	0.1063	0.05369	-0.2357	0.09266	0.001407	-0.342
11	rs10893173	0	99220141	G	A	-0.08409	0.03987	0.1681	0.0682	0.001411	0.25219
20	rs6072814	0	41285978	C	T	0.1267	0.06225	-0.2776	0.1103	0.001411	-0.4043
13	rs9536287	0	53359412	G	A	-0.02271	0.03022	0.1724	0.05312	0.001411	0.19511
4	rs10520242	0	173598033	T	C	-0.04569	0.04895	0.2701	0.08596	0.001414	0.31579
4	rs2391031	0	127251381	A	G	-0.03274	0.0316	0.1711	0.05549	0.001414	0.20384
12	rs4761222	0	70952982	G	A	-0.03879	0.03714	0.2033	0.06613	0.001414	0.24209
2	rs10496056	0	56145270	G	A	-0.07509	0.06523	0.3448	0.1142	0.001415	0.41989
9	rs16913581	0	100942499	T	C	0.1707	0.09609	-0.4443	0.167	0.001415	-0.615
18	rs3760533	0	13760290	C	T	0.08872	0.03137	-0.1141	0.05527	0.001416	-0.20282
9	rs3996253	0	96591066	T	C	-0.06773	0.03029	0.1298	0.05397	0.001418	0.19753
2	rs6730178	0	3458400	T	C	-0.03635	0.05426	0.31	0.09401	0.001418	0.34635
10	rs6482072	0	20250530	G	A	0.06342	0.03113	-0.1359	0.05419	0.001424	-0.19932
1	rs10925994	0	240015308	T	C	0.09747	0.05158	-0.2345	0.0904	0.001425	-0.33197
2	rs4676274	0	109948720	T	C	0.02336	0.02996	-0.1702	0.05277	0.001425	-0.19356
7	rs6467366	0	130887687	T	C	0.01679	0.03792	-0.2253	0.06574	0.001425	-0.24209
12	rs11058200	0	125968891	C	T	0.08599	0.03256	-0.1232	0.05693	0.001426	-0.20919
9	rs1880013	0	14985047	C	A	-0.04472	0.03181	0.1612	0.05618	0.001428	0.20592
3	rs7630996	0	140047836	C	T	0.08689	0.03009	-0.1057	0.05238	0.001429	-0.19259
1	rs9426003	0	34602870	A	G	-0.0262	0.03296	0.187	0.05818	0.00143	0.2132
12	rs11108368	0	96386138	A	G	0.08552	0.03103	-0.1135	0.05416	0.001432	-0.19902
9	rs12337423	0	14903275	C	T	0.07982	0.03863	-0.1655	0.06656	0.001433	-0.24532
18	rs4047832	0	63747520	T	C	-0.04501	0.03449	0.1781	0.06091	0.001435	0.22311
12	rs12823249	0	129257007	A	G	-0.0873	0.07624	0.4029	0.1336	0.001438	0.4902
4	rs10003789	0	142266475	G	A	-0.09925	0.06759	0.3322	0.1173	0.001439	0.43145
4	rs1946797	0	173632325	C	T	-0.0514	0.04712	0.2534	0.08324	0.001439	0.3048
1	rs12092682	0	12166855	T	G	-0.02106	0.03569	0.2071	0.06208	0.00144	0.22816
9	rs10739927	0	95052081	T	G	-0.007729	0.03107	0.1926	0.05465	0.001443	0.200329
5	rs1835959	0	139920311	G	A	-0.07242	0.04163	0.195	0.0729	0.001444	0.26742
1	rs2236800	0	19058929	A	G	0.0744	0.02996	-0.1184	0.05258	0.001444	-0.1928
4	rs4401434	0	174631643	G	A	0.046	0.05137	-0.2827	0.08948	0.001445	-0.3287
1	rs6678540	0	24421474	A	G	-0.05562	0.03007	0.1376	0.05269	0.001445	0.19322
6	rs7757564	0	10295815	C	T	0.04746	0.03957	-0.2058	0.06895	0.001445	-0.25326
11	rs12292425	0	46644143	G	T	0.05553	0.0395	-0.2002	0.06993	0.001449	-0.25573
2	rs13415618	0	49197461	A	G	0.1197	0.04924	-0.1974	0.08653	0.00145	-0.3171
15	rs1480821	0	84597799	C	T	0.05781	0.03436	-0.1622	0.05995	0.001451	-0.22001
9	rs224016	0	20322257	T	C	-0.0775	0.03209	0.1288	0.05628	0.001453	0.2063
2	rs475612	0	169776746	T	C	0.06789	0.03099	-0.1325	0.0548	0.001455	-0.20039
2	rs10445976	0	95676438	T	C	0.1378	0.0473	-0.1661	0.08296	0.00146	-0.3039
2	rs634273	0	4474196	A	G	-0.06589	0.03382	0.1514	0.05932	0.001463	0.21729
6	rs10485271	0	102017666	C	T	-0.0276	0.05461	-0.3846	0.09807	0.001469	-0.357
5	rs2913466	0	173767508	C	A	0.07907	0.03564	-0.1508	0.06289	0.001469	-0.22987
8	rs7011901	0	144005285	A	G	0.1817	0.123	-0.5967	0.2116	0.00147	-0.7784
12	rs1523118	0	39229699	T	C	0.07023	0.02974	-0.1219	0.05258	0.001471	-0.19213
9	rs6474884	0	15060291	C	T	-0.03481	0.0329	0.1784	0.05845	0.001476	0.21321
11	rs4923127	0	23783338	G	A	0.04789	0.03061	-0.1495	0.05401	0.001477	-0.19739
7	rs1012768	0	24356504	G	T	-0.08153	0.0295	0.1088	0.05209	0.00148	0.19033
11	rs7926975	0	128335657	A	G	0.03272	0.04819	-0.2776	0.08493	0.001484	-0.31032
12	rs4765252	0	125930818	A	G	0.07995	0.03257	-0.1276	0.05662	0.001485	-0.20755
7	rs4445118	0	12708420	T	C	0.06314	0.0307	-0.1334	0.0537	0.001487	-0.19654
4	rs1511802	0	187150806	C	T	0.06971	0.03059	-0.1269	0.05378	0.001488	-0.19661
4	rs1039559	0	38831596	A	G	0.02412	0.0299	-0.1664	0.052	0.001489	-0.19052
4	rs10002181	0	142250415	G	A	-0.101	0.06766	0.3296	0.1175	0.001492	0.4306
4	rs904448	0	186663425	C	A	0.02305	0.03818	-0.2236	0.06763	0.001493	-0.24665
13	rs2585890	0	21581439	G	A	-0.0535	0.03242	0.1544	0.05689	0.001495	0.2079
12	rs10774037	0	2420526	G	A	0.07606	0.0372	-0.1621	0.06514	0.001497	-0.23816
3	rs12489386	0	49927503	T	G	0.1282	0.05403	-0.2129	0.09289	0.0015	-0.3411
13	rs542796	0	66636157	G	A	0.0689	0.0335	-0.144	0.05811	0.001504	-0.2129
5	rs17342682	0	36064980	A	G	0.04348	0.0306	-0.1525	0.05362	0.001505	-0.19598
9	rs9695734	0	96407983	T	C	-0.05332	0.03909	0.1966	0.06836	0.001507	0.24992
13	rs7987910	0	88217940	T	C	0.06408	0.0316	-0.139	0.05564	0.001508	-0.20308
7	rs2029223	0	130889128	G	A	0.01611	0.03793	-0.2247	0.06573	0.001509	-0.24081
9	rs4877068	0	91871356	A	G	0.1005	0.05001	-0.2212	0.08823	0.001511	-0.3217
11	rs7951579	0	46469900	A	G	0.05653	0.03942	-0.1974	0.06967	0.001514	-0.25393
10	rs590937	0	43149991	C	T	0.06546	0.02993	-0.1255	0.05225	0.001516	-0.19096
3	rs17749394	0	94173895	A	G	0.01671	0.03507	0.2412	0.06148	0.001518	0.22449
15	rs7165052	0	34064616	T	C	0.07095	0.03038	-0.1224	0.05288	0.001519	-0.19335
4	rs12505581	0	152948812	G	A	0.01041	0.05166	-0.3223	0.09139	0.001527	-0.33271
18	rs12454046	0	8904267	T	C	0.1097	0.04264	-0.1636	0.07497	0.001528	-0.2733
12	rs1799455	0	16309061	G	A	-0.05528	0.03117	0.1437	0.05449	0.001529	0.19898
4	rs28674488	0	128923006	G	T	0.3746	0.1719	-0.7538	0.3119	0.001531	-1.1284
1	rs10797593	0	232940953	C	T	-0.04323	0.07199	0.422	0.128	0.001533	0.46523
5	rs7703631	0	3415311	T	C	0.1363	0.04414	-0.1464	0.07754	0.001534	-0.2827
6	rs9394952	0	43401105	A	G	-0.08292	0.02972	0.1085	0.05261	0.001534	0.19142
4	rs7674486	0	161314077	G	T	0.104	0.0345	-0.1178	0.06091	0.001536	-0.2218
4	rs17865200	0	118497425	C	T	0.2271	0.1023	-0.4532	0.1888	0.001537	-0.6803
3	rs2903971	0	116935744	G	T	0.008534	0.0392	0.2626	0.06998	0.001538	0.254066
2	rs10184895	0	190080363	A	T	-0.09358	0.07264	0.3643	0.125	0.001541	0.45788
6	rs2092745	0	80454831	G	A	0.07603	0.03074	-0.1188	0.05328	0.001541	-0.19483
3	rs7631739	0	148236575	A	G	0.2234	0.04867	-0.0858	0.08463	0.001542	-0.3092
11	rs11219741	0	99262251	T	C	-0.08176	0.0411	0.1778	0.07093	0.001543	0.25956
6	rs2796051	0	73845875	A	G	0.1502	0.0718	-0.3257	0.1321	0.001543	-0.4759
2	rs12478802	0	67897708	T	C	0.05949	0.03699	-0.1766	0.06474	0.001544	-0.23609
10	rs16914968	0	62149543	T	C	-0.006731	0.04307	-0.2808	0.07509	0.001544	-0.274069
18	rs6566147	0	62613183	A	G	0.07051	0.03229	-0.1378	0.05731	0.001544	-0.20831
1	rs6681289	0	119421209	A	G	-0.01204	0.04419	0.2729	0.0784	0.001544	0.28494
3	rs6777857	0	8519329	C	T	-0.03713	0.03048	0.1571	0.05325	0.001544	0.19423
4	rs7687423	0	164250797	A	G	0.08492	0.03083	-0.111	0.05363	0.001544	-0.19592
1	rs12562229	0	41105238	G	A	-0.08957	0.03465	0.1344	0.06169	0.001548	0.22397
2	rs2293649	0	173352103	T	C	-0.03515	0.0368	0.203	0.06562	0.001549	0.23815
19	rs11665933	0	56588096	T	C	0.1457	0.04643	-0.1461	0.07966	0.00155	-0.2918
9	rs3893387	0	86796094	C	T	0.1064	0.1142	-0.6288	0.2023	0.001551	-0.7352
12	rs6538289	0	92064178	T	C	-0.05389	0.03056	0.143	0.05418	0.001551	0.19689
18	rs12959586	0	63779608	C	T	-0.04369	0.03456	0.1784	0.06109	0.001552	0.22209
13	rs7999346	0	21650467	A	C	-0.05171	0.03126	0.1488	0.05512	0.001554	0.20051
5	rs4869558	0	37922362	T	C	-0.08427	0.03291	0.1257	0.05763	0.001556	0.20997
9	rs10992322	0	95159196	G	A	-0.00842	0.0312	0.1913	0.05491	0.001561	0.19972
2	rs4359651	0	88464840	G	T	-0.04445	0.03345	0.1689	0.05858	0.001561	0.21335
9	rs717373	0	17699909	C	T	-0.02736	0.02997	0.1648	0.05285	0.001561	0.19216
3	rs3772904	0	81719425	A	G	-0.187	0.093	0.4197	0.1678	0.001566	0.6067
20	rs4925253	0	59963109	G	A	-0.1439	0.03745	0.09807	0.06674	0.001566	0.24197
17	rs4794776	0	36480609	C	T	-0.08692	0.05632	0.2779	0.1007	0.001568	0.36482
1	rs1250880	0	76196602	T	C	-0.02962	0.03158	0.1718	0.05535	0.001569	0.20142
11	rs327483	0	25826554	T	C	0.0466	0.03448	-0.1733	0.0604	0.001569	-0.2199
1	rs7536191	0	152783560	G	A	0.04161	0.03365	-0.1739	0.05928	0.001571	-0.21551
21	rs2837992	0	42620520	T	C	-0.08737	0.03084	0.1108	0.05459	0.001575	0.19817
1	rs12033709	0	80768813	T	C	0.06303	0.04766	-0.2395	0.08305	0.001579	-0.30253
12	rs10161219	0	45941969	A	G	0.0214	0.06493	-0.3884	0.1123	0.00158	-0.4098
4	rs6532382	0	93786775	A	G	-0.05005	0.03256	0.1577	0.05713	0.001583	0.20775
15	rs8035543	0	39397325	A	G	0.09153	0.04438	-0.1898	0.07722	0.001583	-0.28133
2	rs7564654	0	173357401	A	G	-0.03468	0.03681	0.203	0.06562	0.001584	0.23768
10	rs9633666	0	1836595	G	T	0.0351	0.04043	-0.2194	0.0697	0.001584	-0.2545
10	rs10509550	0	90219298	C	T	0.01289	0.03363	-0.2022	0.05921	0.001587	-0.21509
7	rs258723	0	81772396	G	A	-0.003079	0.03094	0.1932	0.05391	0.001587	0.196279
22	rs4253772	0	46627603	T	C	0.08761	0.04783	-0.218	0.08413	0.00159	-0.30561
1	rs2473355	0	15750217	G	A	-0.06401	0.03072	0.1309	0.05355	0.001593	0.19491
11	rs1514084	0	22551767	G	A	-0.05565	0.03311	0.1545	0.05775	0.001596	0.21015
6	rs6927753	0	108001844	G	A	0.2688	0.09238	-0.3097	0.1583	0.001596	-0.5785
6	rs10484434	0	26031613	A	G	-0.03467	0.04252	0.2399	0.0759	0.001599	0.27457
22	rs1005500	0	48495932	C	T	0.04561	0.04112	-0.2136	0.0711	0.0016	-0.25921
2	rs2894610	0	227595233	G	A	0.2634	0.07511	-0.2153	0.1318	0.0016	-0.4787
3	rs9859813	0	49902553	A	G	0.124	0.05401	-0.2156	0.09306	0.001601	-0.3396
6	rs11755492	0	26046158	C	T	-0.03794	0.04246	0.2362	0.07578	0.001602	0.27414
4	rs1587734	0	120809455	C	T	0.01546	0.03378	-0.1996	0.0592	0.001603	-0.21506
9	rs7026361	0	95138564	T	G	-0.009519	0.03107	0.1886	0.05457	0.001603	0.198119
22	rs9626814	0	46637254	A	G	0.09337	0.048	-0.213	0.08439	0.001603	-0.30637
10	rs11189556	0	100096995	C	T	-0.08412	0.1166	0.6633	0.2063	0.001606	0.74742
7	rs11766651	0	1161646	T	C	-0.04363	0.03156	0.1583	0.05567	0.001606	0.20193
2	rs10469562	0	144463315	A	G	-0.04342	0.03366	0.1704	0.05882	0.001607	0.21382
7	rs11763757	0	71327836	T	C	0.07705	0.03285	-0.1327	0.05782	0.001607	-0.20975
18	rs4892018	0	70302321	T	C	-0.1011	0.03564	0.1276	0.06314	0.001607	0.2287
10	rs17099657	0	84005517	G	A	0.08427	0.0804	-0.4097	0.1344	0.001608	-0.49397
10	rs2358660	0	20315373	T	C	0.05959	0.03501	-0.1648	0.06193	0.001609	-0.22439
3	rs2008239	0	69406469	A	G	-0.1509	0.05302	0.1921	0.09494	0.001611	0.343
13	rs9524596	0	95368839	G	A	0.04651	0.03031	-0.1466	0.05322	0.001611	-0.19311
5	rs10737963	0	40716153	C	A	-0.1015	0.03406	0.1155	0.0598	0.001617	0.217
6	rs2747688	0	163576293	C	T	0.06768	0.03234	-0.1373	0.05643	0.001621	-0.20498
7	rs3801595	0	83630714	C	A	0.2694	0.1079	-0.4252	0.1922	0.001623	-0.6946
7	rs1502948	0	25653642	C	A	-0.008277	0.04449	0.2748	0.07803	0.001624	0.283077
12	rs1727387	0	119871702	T	C	0.01812	0.03986	-0.2337	0.06925	0.001624	-0.25182
7	rs16879765	0	37989095	T	C	-0.02084	0.04905	-0.3382	0.08795	0.001625	-0.31736
1	rs4654947	0	21805048	C	T	-0.01255	0.03497	0.214	0.06283	0.001625	0.22655
12	rs11178323	0	70996186	A	G	0.03484	0.0394	-0.2135	0.06827	0.001626	-0.24834
2	rs557462	0	169777595	C	T	0.06369	0.03102	-0.135	0.05491	0.001628	-0.19869
11	rs3019862	0	132614490	G	A	-0.03808	0.06067	0.3432	0.1047	0.001631	0.38128
8	rs17743495	0	117652242	T	C	0.1166	0.04632	-0.1791	0.08167	0.001635	-0.2957
11	rs2129930	0	38002718	G	A	-0.05003	0.0382	0.1903	0.06609	0.001639	0.24033
7	rs741599	0	127339415	G	T	0.02622	0.03032	-0.1668	0.05327	0.00164	-0.19302
8	rs4840991	0	8429687	A	G	0.03241	0.02979	-0.1574	0.05244	0.001647	-0.18981
9	rs10820964	0	95041636	A	G	-0.007612	0.03107	0.1901	0.05461	0.001648	0.197712
13	rs9590101	0	95543945	G	A	0.03836	0.03663	-0.1944	0.06426	0.001649	-0.23276
1	rs12135449	0	249149486	C	T	-0.0706	0.04238	0.1964	0.07352	0.001651	0.267
2	rs3900115	0	202050677	A	G	-0.09056	0.0299	0.09873	0.0522	0.001651	0.18929
4	rs17058802	0	173643640	C	A	-0.0522	0.0474	0.2513	0.08401	0.001652	0.3035
5	rs10482634	0	142750449	G	A	0.06645	0.03639	-0.1686	0.06524	0.001655	-0.23505
21	rs3787966	0	43648423	G	A	0.04867	0.03095	-0.1483	0.05443	0.001656	-0.19697
2	rs4953926	0	135472847	C	T	-0.07497	0.02431	0.07905	0.04249	0.001656	0.15402
4	rs1841587	0	73674780	C	T	-0.04649	0.03116	0.151	0.05451	0.001657	0.19749
1	rs4648931	0	24389213	T	G	0.08076	0.05496	-0.2605	0.09354	0.001659	-0.34126
10	rs10904445	0	5275762	T	G	-0.1095	0.05186	0.2196	0.0909	0.001661	0.3291
6	rs1208254	0	134132516	C	A	-0.08102	0.03678	0.1503	0.0637	0.001662	0.23132
3	rs9878774	0	176238310	T	C	0.004402	0.04581	0.2965	0.08082	0.001663	0.292098
1	rs10489858	0	19947256	C	T	0.07405	0.04896	-0.2392	0.08677	0.001664	-0.31325
3	rs7632590	0	194612501	G	A	0.09917	0.04495	-0.1871	0.07917	0.001664	-0.28627
9	rs16928802	0	128991622	T	C	0.08689	0.05358	-0.264	0.0979	0.001665	-0.35089
10	rs2339893	0	53688297	C	A	-0.05819	0.03454	0.1608	0.06047	0.001665	0.21899
15	rs4633660	0	53807399	C	T	0.05422	0.09128	-0.5268	0.1607	0.001669	-0.58102
5	rs17343598	0	36103905	A	G	0.03391	0.03026	-0.158	0.05304	0.00167	-0.19191
1	rs2281237	0	19953165	A	G	0.0802	0.04917	-0.2347	0.08729	0.00167	-0.3149
20	rs2426103	0	47394490	A	C	-0.02258	0.0517	0.3164	0.09465	0.00167	0.33898
13	rs9521941	0	111445104	A	G	-0.1037	0.03226	0.1034	0.05744	0.00167	0.2071
12	rs11106135	0	91803099	G	A	-0.08344	0.04449	0.1988	0.078	0.001671	0.28224
8	rs11203841	0	12688558	C	A	0.08673	0.03454	-0.1302	0.05977	0.001671	-0.21693
6	rs1608530	0	148002142	T	C	0.08966	0.04731	-0.2073	0.08179	0.001673	-0.29696
3	rs987558	0	148220105	C	T	0.2192	0.04867	-0.08781	0.08468	0.001673	-0.30701
16	rs10500459	0	62049939	G	A	0.1061	0.1474	-0.8397	0.2624	0.001675	-0.9458
9	rs1353223	0	14842557	C	T	0.2088	0.06126	-0.1736	0.1052	0.001675	-0.3824
6	rs3823231	0	93959361	C	T	-0.06761	0.02974	0.1223	0.05262	0.001675	0.18991
9	rs10820230	0	105446609	A	G	0.02721	0.03896	-0.2171	0.06728	0.001679	-0.24431
2	rs1427587	0	137492648	T	C	0.06079	0.04595	-0.2327	0.08135	0.001679	-0.29349
1	rs10802607	0	237516073	C	T	0.1074	0.03674	-0.1284	0.06547	0.001684	-0.2358
2	rs537183	0	169774646	C	T	0.06373	0.03105	-0.1344	0.05491	0.001687	-0.19813
3	rs11719995	0	51593827	C	T	-0.07046	0.04146	0.1886	0.07133	0.001691	0.25906
1	rs10910625	0	232940447	G	A	-0.03966	0.07239	0.4238	0.1287	0.001693	0.46346
8	rs10108910	0	8419612	T	C	-0.0238	0.03014	0.1674	0.05292	0.001694	0.1912
8	rs2912498	0	69943681	A	G	-0.01838	0.03639	0.2134	0.06425	0.001699	0.23178
1	rs1770489	0	19945189	G	A	0.06165	0.03651	-0.1727	0.06514	0.0017	-0.23435
9	rs17341528	0	83111466	G	A	0.09809	0.06016	-0.2823	0.1053	0.001704	-0.38039
19	rs3746319	0	44612231	A	G	0.0693	0.04035	-0.186	0.07065	0.001704	-0.2553
10	rs1536452	0	130552334	T	G	0.06163	0.0312	-0.1356	0.05457	0.001705	-0.19723
15	rs493301	0	58066561	G	T	-0.05256	0.03042	0.1395	0.05314	0.001705	0.19206
15	rs2575423	0	96368106	A	G	-0.007869	0.03333	0.2022	0.0581	0.001706	0.210069
13	rs570061	0	21599824	A	G	-0.04996	0.03442	0.1693	0.06082	0.001707	0.21926
12	rs1514796	0	101180986	T	C	0.02951	0.03283	-0.1802	0.05824	0.001709	-0.20971
22	rs11704508	0	46638540	G	A	0.09127	0.04784	-0.2127	0.08427	0.00171	-0.30397
7	rs10274964	0	1019784	T	C	0.04423	0.03045	-0.1467	0.05271	0.001712	-0.19093
7	rs6943934	0	1189178	C	T	0.1752	0.0684	-0.2612	0.1212	0.001714	-0.4364
2	rs12476718	0	137493598	G	T	0.07023	0.04457	-0.214	0.07895	0.001718	-0.28423
7	rs12668298	0	123614911	A	G	-0.08006	0.04606	0.2122	0.08105	0.001718	0.29226
1	rs3845590	0	15138738	A	G	-0.04899	0.03164	0.1521	0.05578	0.001718	0.20109
13	rs3002216	0	25681106	A	G	0.04007	0.03396	-0.175	0.05963	0.001722	-0.21507
16	rs33120	0	83854596	T	C	-0.02942	0.03045	0.1635	0.05351	0.001723	0.19292
5	rs10475431	0	8447327	G	T	-0.002474	0.06435	0.4128	0.1158	0.001725	0.415274
3	rs11925758	0	159557538	T	C	0.03373	0.04314	-0.2387	0.07549	0.001725	-0.27243
3	rs1948721	0	192629447	T	C	-0.0207	0.03036	0.1716	0.05333	0.001728	0.1923
9	rs817827	0	110156279	T	C	0.01603	0.03044	-0.1783	0.05404	0.001729	-0.19433
7	rs916654	0	88150798	T	G	0.09544	0.05602	-0.2622	0.09948	0.001731	-0.35764
10	rs6480547	0	53650135	A	C	0.05934	0.03333	-0.151	0.05828	0.001733	-0.21034
2	rs12692423	0	11075317	A	G	0.0738	0.03359	-0.1366	0.05817	0.001737	-0.2104
8	rs261572	0	97022165	G	T	-0.00666	0.04725	-0.303	0.08198	0.001737	-0.29634
12	rs10846900	0	125959440	C	T	0.0851	0.03259	-0.1204	0.05694	0.001739	-0.2055
6	rs13196546	0	13464827	T	C	0.06046	0.04216	-0.2045	0.07337	0.001739	-0.26496
17	rs7215278	0	75215103	T	G	-0.1051	0.06091	0.2933	0.1117	0.001739	0.3984
5	rs17209251	0	142669223	G	A	0.06319	0.03628	-0.1699	0.06498	0.001741	-0.23309
4	rs4337775	0	66359577	A	G	-0.06187	0.03033	0.1308	0.05354	0.001741	0.19267
4	rs2132845	0	140587125	T	A	0.04851	0.06161	-0.3419	0.1084	0.001742	-0.39041
13	rs11620165	0	105581852	A	C	0.07451	0.0355	-0.1494	0.06211	0.00175	-0.22391
2	rs2602374	0	234568964	T	C	-0.04144	0.03334	0.1686	0.05824	0.00175	0.21004
2	rs6430529	0	135433023	G	T	-0.07089	0.02508	0.08788	0.0441	0.00175	0.15877
9	rs887807	0	123050797	C	T	0.1646	0.06581	-0.2605	0.1188	0.001751	-0.4251
10	rs927821	0	104207799	C	A	0.003679	0.03958	-0.2472	0.06971	0.001752	-0.250879
11	rs2046735	0	45565539	A	G	-0.004406	0.03649	0.2274	0.06445	0.001753	0.231806
2	rs10188246	0	190171008	C	T	-0.09157	0.07297	0.3611	0.1249	0.001754	0.45267
4	rs12647911	0	16146149	C	T	0.09769	0.03507	-0.1246	0.06178	0.001754	-0.22229
17	rs7218395	0	26241477	G	A	-0.02358	0.03174	0.1771	0.05572	0.001754	0.20068
1	rs2154317	0	41785792	G	A	0.005714	0.03139	-0.1932	0.05531	0.001756	-0.198914
13	rs4907674	0	112852673	G	T	0.08024	0.03911	-0.1675	0.06884	0.001756	-0.24774
6	rs11961044	0	164672324	T	C	0.08969	0.05976	-0.2903	0.1058	0.001757	-0.37999
9	rs10961817	0	14982751	A	G	-0.04336	0.03162	0.1576	0.05591	0.001759	0.20096
4	rs11737767	0	153879878	T	C	0.02762	0.03071	0.2226	0.05423	0.001759	0.19498
10	rs10904173	0	462885	A	G	0.03678	0.0301	-0.1535	0.05286	0.001763	-0.19028
11	rs7484002	0	46640503	G	A	0.05635	0.0395	-0.195	0.07	0.001763	-0.25135
11	rs2249031	0	105800066	G	A	0.1172	0.06985	-0.327	0.1237	0.001765	-0.4442
14	rs11623704	0	30040254	T	C	-0.03548	0.07537	0.4338	0.1298	0.001768	0.46928
14	rs17408765	0	34164471	G	A	-0.03952	0.04718	0.2594	0.08315	0.001768	0.29892
2	rs6707974	0	30429330	G	A	0.1039	0.04103	-0.1536	0.07139	0.001768	-0.2575
3	rs1159882	0	148234314	C	T	0.2198	0.04871	-0.08542	0.08463	0.00177	-0.30522
5	rs406292	0	80961822	C	T	0.1024	0.03131	-0.09444	0.05464	0.001771	-0.19684
7	rs12536378	0	154058474	C	T	-0.07346	0.03087	0.1214	0.05415	0.001772	0.19486
9	rs2252968	0	130321117	C	T	0.03739	0.03218	-0.1679	0.05724	0.001772	-0.20529
9	rs10992765	0	96270954	A	C	-0.06299	0.04646	0.2297	0.08128	0.001773	0.29269
2	rs17036039	0	47229953	C	T	-0.1141	0.07292	0.3455	0.1278	0.001785	0.4596
4	rs1512320	0	45077656	G	T	-0.0801	0.03788	0.1614	0.06739	0.001786	0.2415
2	rs16822570	0	227599533	G	T	0.2609	0.07504	-0.2128	0.1318	0.001788	-0.4737
1	rs12023196	0	152783724	C	T	0.04751	0.03407	-0.1672	0.05971	0.001789	-0.21471
19	rs11672791	0	16996200	C	T	0.06043	0.03099	-0.1339	0.05395	0.001792	-0.19433
12	rs4931593	0	32144856	C	A	0.009967	0.03171	-0.1888	0.0552	0.001793	-0.198767
11	rs17134821	0	76104085	T	C	0.08129	0.05731	-0.2844	0.1021	0.001795	-0.36569
8	rs2609983	0	57385366	A	G	0.01843	0.03011	-0.1717	0.05295	0.001796	-0.19013
6	rs6914269	0	148024669	A	G	-0.05665	0.03467	0.1615	0.06067	0.001799	0.21815
8	rs7832549	0	4205477	A	G	-0.03353	0.0303	0.1595	0.05392	0.001799	0.19303
19	rs7248584	0	39258110	T	C	-0.07291	0.02979	0.1145	0.05214	0.0018	0.18741
8	rs11783334	0	25529106	T	C	-0.02592	0.03131	0.1706	0.05463	0.001801	0.19652
6	rs1525361	0	64094892	C	T	0.01653	0.0588	-0.352	0.1024	0.001801	-0.36853
6	rs9502425	0	6226147	G	A	-0.1355	0.06096	0.2463	0.1061	0.001801	0.3818
11	rs17149775	0	68909579	G	A	-0.06316	0.04144	0.1999	0.07341	0.001804	0.26306
19	rs2015	0	39369369	G	T	0.05176	0.03141	-0.147	0.05544	0.00181	-0.19876
7	rs3800654	0	137439592	A	C	-0.07765	0.03591	0.1466	0.06229	0.001812	0.22425
6	rs750811	0	164111361	A	G	-0.01858	0.03723	0.2167	0.0656	0.001814	0.23528
6	rs9353368	0	64648161	C	T	0.05939	0.03262	-0.1444	0.05661	0.001815	-0.20379
12	rs6539284	0	79592680	C	T	0.02662	0.03019	-0.1642	0.05321	0.001816	-0.19082
3	rs2141670	0	160358462	T	C	-0.06155	0.04159	0.2008	0.07311	0.001817	0.26235
20	rs6100476	0	58093429	G	A	0.09822	0.03112	-0.09816	0.05475	0.001818	-0.19638
6	rs9384297	0	155537311	G	T	0.007633	0.03888	-0.2392	0.06896	0.001818	-0.246833
14	rs149678	0	72625861	A	G	-0.09315	0.05471	0.2536	0.0968	0.00182	0.34675
4	rs6820391	0	54414696	A	C	-0.09036	0.03357	0.1216	0.0591	0.001821	0.21196
1	rs11578927	0	152728472	C	A	0.06613	0.03059	-0.1261	0.05353	0.001822	-0.19223
1	rs17436212	0	80816962	G	A	0.05871	0.04894	-0.2499	0.08605	0.001822	-0.30861
7	rs6465744	0	98843919	C	T	-0.07807	0.05505	0.2767	0.09961	0.001822	0.35477
7	rs1543985	0	1213127	A	G	-0.04669	0.03124	0.1514	0.05534	0.001823	0.19809
15	rs3098545	0	27871414	A	C	-0.003337	0.1026	-0.6452	0.1786	0.00183	-0.641863
11	rs7949225	0	13800622	A	G	-0.07082	0.03076	0.1235	0.05423	0.00183	0.19432
6	rs1208228	0	134091966	G	T	-0.08131	0.03851	0.1595	0.06699	0.001832	0.24081
6	rs9349256	0	43404511	A	G	-0.08191	0.02973	0.1064	0.05262	0.001836	0.18831
7	rs4716881	0	157817047	A	G	-0.04313	0.0323	0.1605	0.05684	0.001838	0.20363
1	rs11162854	0	80351989	C	T	-0.04172	0.04062	0.2113	0.07033	0.001841	0.25302
4	rs17470661	0	45083659	A	G	-0.1227	0.04392	0.155	0.07761	0.001844	0.2777
22	rs4925414	0	49156238	A	G	0.06426	0.03375	-0.1478	0.05915	0.001844	-0.21206
4	rs17294646	0	175433709	T	C	-0.1445	0.0616	0.2421	0.1078	0.001845	0.3866
4	rs10021126	0	150678416	C	A	-0.07757	0.05551	0.2698	0.09677	0.001846	0.34737
1	rs1053074	0	160009121	C	A	-0.01078	0.03108	0.1849	0.05463	0.001846	0.19568
2	rs6709104	0	176979396	A	G	-0.0145	0.03403	0.2016	0.06049	0.001846	0.2161
5	rs10044900	0	157451580	G	A	-0.1037	0.03902	0.1447	0.06958	0.001847	0.2484
16	rs11150416	0	81863593	A	G	0.05179	0.0318	-0.1464	0.05515	0.001847	-0.19819
6	rs12681	0	152443389	T	C	0.05291	0.03626	-0.1765	0.06413	0.001849	-0.22941
3	rs2244503	0	64945871	G	A	0.02098	0.03753	-0.2169	0.06654	0.001849	-0.23788
10	rs10827940	0	20349877	C	T	0.07461	0.03648	-0.1566	0.06469	0.001853	-0.23121
7	rs6973318	0	130668383	T	C	-0.05564	0.03365	0.1563	0.05919	0.001853	0.21194
2	rs13013629	0	5372402	C	T	0.07348	0.045	-0.2147	0.08091	0.001854	-0.28818
3	rs17074351	0	42433305	C	T	-0.0001962	0.03507	0.2213	0.06193	0.001856	0.2214962
11	rs4601775	0	23784536	T	G	0.04908	0.03058	-0.1438	0.0539	0.001856	-0.19288
11	rs12577048	0	24699102	T	C	-0.03631	0.04236	0.2268	0.07317	0.001857	0.26311
11	rs7112918	0	1690969	C	T	0.003212	0.03115	-0.1951	0.05559	0.001857	-0.198312
1	rs10925374	0	237504759	C	T	0.09748	0.04241	-0.1691	0.07442	0.001861	-0.26658
1	rs1930212	0	104324819	G	A	-0.07226	0.0376	0.1683	0.06756	0.001861	0.24056
2	rs841443	0	137351216	C	T	-0.07553	0.1066	0.5852	0.1837	0.001861	0.66073
3	rs11928764	0	23698252	C	T	-0.04655	0.03888	0.2024	0.06993	0.001862	0.24895
14	rs17127484	0	92102759	G	A	-0.0259	0.03613	0.202	0.0637	0.001862	0.2279
22	rs136890	0	45044681	A	G	0.06109	0.03243	-0.1417	0.05652	0.001863	-0.20279
7	rs1017607	0	127814357	G	A	0.03566	0.02986	-0.1508	0.05197	0.001866	-0.18646
12	rs6488810	0	16156604	T	C	-0.1122	0.03442	0.105	0.06073	0.001866	0.2172
1	rs17418461	0	57536582	C	T	0.04005	0.05586	-0.318	0.1006	0.001867	-0.35805
5	rs13164296	0	116772093	G	A	-0.09184	0.05986	0.2794	0.1033	0.001869	0.37124
2	rs2363731	0	88521793	T	C	-0.1334	0.0476	0.1704	0.08531	0.001869	0.3038
7	rs706021	0	16605357	A	G	0.09457	0.03053	-0.09836	0.054	0.001871	-0.19293
13	rs9566935	0	42767185	G	T	0.07831	0.1027	-0.5676	0.1805	0.001873	-0.64591
16	rs12447912	0	49934695	A	G	-0.06568	0.04099	0.192	0.07205	0.001877	0.25768
18	rs8090073	0	70880006	G	A	0.08378	0.05198	-0.2448	0.09205	0.001883	-0.32858
5	rs17731499	0	167764600	C	A	0.03744	0.04142	-0.2206	0.07196	0.001887	-0.25804
13	rs7332705	0	108215893	G	T	0.0964	0.05128	-0.2259	0.09018	0.00189	-0.3223
2	rs11891642	0	28421381	T	C	0.07263	0.03629	-0.1524	0.06267	0.001891	-0.22503
12	rs3213545	0	121471337	A	G	-0.08935	0.0344	0.128	0.06092	0.001891	0.21735
9	rs7851250	0	4796225	C	T	-0.05061	0.04049	0.2013	0.07026	0.001892	0.25191
18	rs2930996	0	76485531	T	G	-0.08807	0.0395	0.1577	0.06854	0.001894	0.24577
2	rs2419986	0	124336412	A	G	-0.02003	0.05363	0.3175	0.0945	0.001896	0.33753
8	rs7844164	0	135014817	C	T	-0.01698	0.03054	0.1743	0.05347	0.001896	0.19128
5	rs250430	0	139941228	A	G	-0.07115	0.04218	0.193	0.07384	0.001898	0.26415
11	rs7937618	0	1647110	T	C	0.05697	0.03931	-0.1917	0.06977	0.001898	-0.24867
1	rs1041705	0	80463537	G	T	-0.01591	0.03116	0.1796	0.0547	0.001899	0.19551
12	rs10860653	0	101279712	G	A	-0.05646	0.0347	0.1606	0.06068	0.001899	0.21706
8	rs10505473	0	128417936	T	C	-0.04629	0.04352	0.2231	0.07506	0.0019	0.26939
1	rs755181	0	102404247	C	T	0.06227	0.03065	-0.1289	0.0534	0.0019	-0.19117
10	rs12221212	0	100086671	T	C	-0.08317	0.1169	0.6562	0.2074	0.001901	0.73937
4	rs10517464	0	38009782	G	A	0.04473	0.03646	-0.1823	0.06339	0.001902	-0.22703
22	rs2001080	0	48845039	A	G	0.07494	0.032	-0.1265	0.05644	0.001903	-0.20144
3	rs17361695	0	63020787	G	A	0.02928	0.03648	-0.2005	0.06441	0.001906	-0.22978
7	rs12670377	0	96786625	A	C	-0.02652	0.03464	-0.2438	0.06081	0.001907	-0.21728
6	rs9399238	0	96259105	G	A	-0.03421	0.03055	0.1584	0.05401	0.001908	0.19261
20	rs6012245	0	36084782	G	A	0.07103	0.03265	-0.1345	0.0576	0.00191	-0.20553
12	rs12371268	0	117523873	G	A	0.07891	0.04668	-0.215	0.08239	0.001911	-0.29391
6	rs12199955	0	24531450	T	G	-0.06577	0.03026	0.1241	0.05316	0.001913	0.18987
21	rs417214	0	15630812	T	G	-0.01497	0.03002	0.1729	0.05258	0.001913	0.18787
19	rs4804629	0	11770579	C	T	-0.01729	0.03054	0.1735	0.05337	0.001913	0.19079
19	rs231597	0	36236120	A	G	-0.09683	0.06178	0.296	0.1105	0.001914	0.39283
2	rs11689995	0	109939843	T	C	0.02251	0.02996	-0.1659	0.05282	0.001915	-0.18841
3	rs11929028	0	51754424	T	G	0.1288	0.05511	-0.2158	0.09644	0.001916	-0.3446
6	rs4380756	0	18072657	A	G	0.02323	0.03483	-0.1944	0.06087	0.001916	-0.21763
9	rs2767770	0	126914307	T	G	0.06999	0.03013	-0.119	0.05294	0.00192	-0.18899
13	rs9571556	0	66778661	G	A	-0.06381	0.03038	0.1272	0.05356	0.001921	0.19101
13	rs9542109	0	70480174	A	G	0.07424	0.04281	-0.1984	0.07675	0.001922	-0.27264
15	rs12899324	0	58555709	T	C	-0.05797	0.03359	0.1553	0.06	0.001924	0.21327
2	rs3922303	0	107812973	C	T	0.004251	0.03749	-0.2336	0.06691	0.001925	-0.237851
8	rs899427	0	21752742	A	G	-0.05758	0.04763	0.2404	0.08346	0.001927	0.29798
7	rs12701348	0	1039457	A	G	0.03663	0.0363	-0.1917	0.06407	0.001929	-0.22833
15	rs2681962	0	54898587	A	G	0.05533	0.04662	-0.2384	0.08245	0.001929	-0.29373
5	rs393766	0	81049187	C	T	0.06771	0.03017	-0.1214	0.05304	0.001935	-0.18911
20	rs6093792	0	41881829	C	A	0.03295	0.0388	-0.2118	0.06877	0.001935	-0.24475
22	rs5997917	0	31621792	A	G	0.06744	0.04764	-0.2314	0.0838	0.001938	-0.29884
18	rs12327010	0	2173323	G	A	-0.06046	0.03147	0.1359	0.055	0.001941	0.19636
6	rs7745923	0	148080434	T	C	-0.08582	0.04257	0.1792	0.07417	0.001941	0.26502
7	rs10243935	0	13697970	G	A	0.03776	0.02996	-0.1512	0.0531	0.001942	-0.18896
6	rs9482958	0	96164110	T	C	-0.004422	0.03258	0.1988	0.05692	0.001942	0.203222
1	rs6677309	0	117080166	C	A	0.09555	0.04566	-0.1875	0.07912	0.001944	-0.28305
16	rs8060595	0	51083636	A	G	0.0688	0.03194	-0.131	0.056	0.001945	-0.1998
2	rs11678328	0	30522830	G	A	-0.04541	0.03204	0.1538	0.05576	0.001947	0.19921
9	rs10821166	0	96351923	A	G	0.04118	0.03019	-0.1503	0.05395	0.001953	-0.19148
1	rs16853610	0	179039055	T	C	0.116	0.06149	-0.2713	0.1089	0.001954	-0.3873
16	rs3751702	0	57206637	A	G	-0.05523	0.03064	0.138	0.05433	0.001954	0.19323
11	rs7481312	0	46596674	T	C	0.05604	0.03952	-0.1931	0.07005	0.001955	-0.24914
3	rs1055429	0	51570508	T	C	-0.09119	0.04384	0.1768	0.07462	0.001957	0.26799
10	rs12783109	0	107455498	A	C	0.009881	0.04047	-0.2428	0.07084	0.001957	-0.252681
7	rs17634488	0	50497131	A	C	0.1361	0.07447	-0.3153	0.1253	0.001963	-0.4514
8	rs13262005	0	18309074	G	A	0.04846	0.02994	-0.1389	0.05262	0.001965	-0.18736
3	rs1154766	0	140054568	T	G	0.0867	0.03002	-0.1003	0.05245	0.001967	-0.187
1	rs12048236	0	232942251	G	A	-0.05336	0.07343	0.4109	0.1308	0.001967	0.46426
3	rs12497205	0	139781025	C	T	0.1179	0.04322	-0.1558	0.07714	0.001967	-0.2737
16	rs6499869	0	57226476	A	C	0.07654	0.06468	-0.3337	0.1157	0.001968	-0.41024
2	rs4246561	0	1152434	C	T	-0.09	0.07495	0.3732	0.1296	0.001971	0.4632
2	rs7602129	0	46235359	C	T	-0.06057	0.03786	0.1762	0.06649	0.001972	0.23677
9	rs13291454	0	128773388	A	G	-0.003405	0.03031	0.1892	0.05436	0.001974	0.192605
5	rs16871658	0	3382263	T	G	0.06772	0.03906	-0.1763	0.06853	0.001975	-0.24402
1	rs10785826	0	108090429	T	C	-0.05491	0.0308	0.1377	0.05412	0.001979	0.19261
7	rs6957511	0	130668618	C	T	-0.05392	0.03164	0.1441	0.05565	0.00198	0.19802
11	rs7125907	0	46622392	T	C	0.05548	0.0395	-0.1932	0.07004	0.001985	-0.24868
1	rs923877	0	83094954	G	A	-0.09748	0.04192	0.1649	0.07379	0.00199	0.26238
7	rs296913	0	138376184	A	C	-0.008562	0.03045	0.1833	0.05409	0.001991	0.191862
7	rs325446	0	127464386	G	A	0.02466	0.03025	-0.1644	0.05316	0.001992	-0.18906
3	rs4974104	0	51383354	G	A	-0.06735	0.0413	0.1869	0.07114	0.001993	0.25425
12	rs1922117	0	63789836	G	T	0.0003572	0.03225	0.2027	0.05694	0.001994	0.2023428
6	rs4710948	0	10305925	A	G	-0.06349	0.0322	0.1387	0.05693	0.001995	0.20219
22	rs2071751	0	48840707	C	T	0.05083	0.03151	-0.1457	0.05521	0.001996	-0.19653
8	rs3133539	0	101850212	A	G	-0.1283	0.06125	0.2576	0.1088	0.001996	0.3859
11	rs16938506	0	46454313	C	A	0.05766	0.03937	-0.1896	0.06963	0.001997	-0.24726
6	rs2797089	0	73851242	T	G	0.1453	0.07205	-0.3226	0.1331	0.001997	-0.4679
14	rs1554116	0	90570376	C	A	0.02189	0.03012	-0.1674	0.05333	0.001999	-0.18929
5	rs10040449	0	20623637	T	C	0.07061	0.073	-0.3911	0.1304	0.002001	-0.46171
7	rs2949170	0	1216438	A	G	-0.03841	0.0312	0.1576	0.05522	0.002002	0.19601
11	rs35623865	0	46631181	T	C	0.06997	0.04139	-0.1904	0.07342	0.002004	-0.26037
20	rs6030749	0	41902254	T	C	0.03078	0.04276	-0.238	0.07575	0.002006	-0.26878
2	rs11126123	0	67606326	G	T	-0.07458	0.03019	0.1139	0.05302	0.002012	0.18848
7	rs4723534	0	36547889	T	G	0.01561	0.033	-0.1895	0.05762	0.002012	-0.20511
4	rs3857050	0	90625419	C	T	-0.06579	0.04624	0.2236	0.08148	0.002013	0.28939
3	rs9854001	0	152762462	C	T	-0.03702	0.04358	0.2358	0.07685	0.002013	0.27282
21	rs1888523	0	44525219	A	G	-0.04146	0.0297	0.1458	0.05285	0.002014	0.18726
18	rs16954483	0	8894977	C	T	0.1086	0.04273	-0.1579	0.07499	0.002015	-0.2665
6	rs9378848	0	4177527	C	T	-0.0614	0.03477	0.1544	0.06065	0.002021	0.2158
2	rs12478824	0	28731702	C	T	0.03023	0.03431	0.2426	0.05961	0.002022	0.21237
8	rs13249144	0	8394297	C	T	-0.0196	0.03017	0.1683	0.05288	0.002023	0.1879
5	rs10941665	0	44398696	G	A	0.05052	0.03173	-0.1465	0.05538	0.002024	-0.19702
11	rs10769677	0	6300016	T	C	-0.06068	0.03405	0.1499	0.05912	0.002028	0.21058
5	rs10482655	0	142705895	G	T	0.06227	0.03646	-0.1682	0.06518	0.002032	-0.23047
7	rs1343646	0	96724452	A	C	-0.03146	0.03615	-0.2575	0.06373	0.002039	-0.22604
11	rs10501273	0	41639836	A	G	-0.2982	0.09439	0.2685	0.1576	0.002041	0.5667
2	rs4563275	0	30549428	A	G	0.07932	0.03094	-0.1125	0.05396	0.002042	-0.19182
1	rs12752037	0	205661614	C	A	0.1154	0.03234	-0.086	0.05672	0.002043	-0.2014
9	rs10964389	0	20022425	C	T	0.1188	0.06186	-0.2593	0.1058	0.002044	-0.3781
8	rs2670068	0	2763334	G	A	-0.02957	0.03726	0.2066	0.06689	0.002045	0.23617
11	rs4488202	0	62185598	G	A	0.01914	0.0351	-0.1976	0.06091	0.002045	-0.21674
3	rs3749314	0	104078692	A	G	0.03881	0.03012	-0.1486	0.05281	0.002049	-0.18741
2	rs10205233	0	227614005	T	C	0.2421	0.07459	-0.2217	0.1307	0.002053	-0.4638
1	rs16830648	0	202595153	G	A	0.06519	0.03305	-0.1409	0.05812	0.002054	-0.20609
6	rs11752464	0	152625963	A	G	0.0355	0.03723	-0.197	0.06559	0.002056	-0.2325
6	rs7751527	0	106937904	T	C	-0.1214	0.04119	0.1363	0.07275	0.002057	0.2577
10	rs10904935	0	17401207	C	A	-0.04483	0.03946	0.2005	0.06914	0.002059	0.24533
5	rs1000590	0	121826721	A	G	0.0527	0.03131	-0.1432	0.05532	0.002062	-0.1959
12	rs12367859	0	14264114	G	A	-0.05778	0.03021	0.1308	0.05323	0.002065	0.18858
8	rs4875568	0	3157117	A	G	-0.1617	0.06827	0.2503	0.115	0.002069	0.412
4	rs4956372	0	142268897	A	G	-0.09236	0.06767	0.3255	0.1176	0.00207	0.41786
7	rs604013	0	63752903	G	A	-0.09833	0.03055	0.09487	0.05478	0.002071	0.1932
19	rs749981	0	35339966	A	G	-0.009904	0.03108	0.1838	0.05467	0.002072	0.193704
10	rs7923873	0	20342316	A	G	0.04894	0.03851	-0.1912	0.0678	0.002073	-0.24014
5	rs10471476	0	59569640	C	A	-0.05985	0.03519	0.1603	0.06222	0.002075	0.22015
1	rs10920333	0	202081212	A	C	0.03452	0.03426	-0.1811	0.06108	0.002076	-0.21562
19	rs17695224	0	52324216	A	G	0.01938	0.03359	-0.1893	0.05888	0.002077	-0.20868
11	rs11819869	0	46560680	T	C	0.06009	0.03939	-0.1864	0.06969	0.002078	-0.24649
1	rs4950791	0	202702353	T	C	0.1312	0.04267	-0.1339	0.07476	0.002078	-0.2651
17	rs9899891	0	14629746	G	A	0.05746	0.03252	-0.1454	0.05729	0.002078	-0.20286
2	rs948583	0	135483413	A	G	-0.06003	0.02475	0.09319	0.04319	0.002085	0.15322
13	rs213615	0	31449156	T	C	0.04025	0.03075	-0.1508	0.05394	0.002086	-0.19105
7	rs4236375	0	1144527	C	T	-0.03271	0.0297	0.1544	0.05308	0.002091	0.18711
11	rs12287339	0	121474025	C	T	0.1902	0.09965	-0.4304	0.1754	0.002093	-0.6206
5	rs3806830	0	140796099	G	A	0.08781	0.07299	-0.3632	0.1271	0.002094	-0.45101
18	rs4800600	0	22416940	G	A	-0.1025	0.0401	0.1466	0.07034	0.002097	0.2491
4	rs16870878	0	21344139	C	A	0.06132	0.04462	-0.2167	0.0786	0.002101	-0.27802
16	rs12599485	0	57194788	C	T	0.06859	0.06466	-0.3391	0.1157	0.002103	-0.40769
11	rs835768	0	44909493	G	A	0.03604	0.03031	-0.1522	0.0532	0.002105	-0.18824
2	rs7578712	0	194217082	A	G	-0.04445	0.03265	0.1596	0.05778	0.002106	0.20405
11	rs3825054	0	118234191	A	G	0.09158	0.04253	-0.1705	0.07387	0.002107	-0.26208
1	rs4926749	0	49203349	C	A	-0.1202	0.03342	0.08917	0.05931	0.002107	0.20937
10	rs4881466	0	5542109	A	G	-0.0484	0.0343	0.1636	0.05981	0.002108	0.212
1	rs10874105	0	80452152	G	A	-0.01935	0.03136	0.1761	0.05532	0.002114	0.19545
20	rs6091060	0	48459362	G	A	-0.06588	0.06209	0.3134	0.1066	0.002116	0.37928
16	rs4888211	0	74276961	C	A	0.07662	0.0314	-0.1179	0.05498	0.002122	-0.19452
14	rs7147255	0	104662014	A	G	0.02651	0.05932	-0.3404	0.1037	0.002122	-0.36691
10	rs12415532	0	25747511	C	T	-0.1091	0.0463	0.1772	0.08088	0.002124	0.2863
20	rs6123960	0	58552125	C	T	0.02342	0.04249	-0.2411	0.07487	0.002125	-0.26452
22	rs5997930	0	31664697	C	T	0.2107	0.0719	-0.2263	0.1227	0.002127	-0.437
3	rs732190	0	197063308	T	G	-0.1563	0.08008	0.3336	0.1379	0.002128	0.4899
1	rs2357331	0	232947295	G	A	-0.05007	0.07358	0.4109	0.1308	0.002129	0.46097
14	rs12881815	0	64604595	A	G	-0.1351	0.06361	0.2624	0.1127	0.002134	0.3975
5	rs17209258	0	142673397	G	A	0.06842	0.03635	-0.1605	0.06508	0.002134	-0.22892
2	rs4420715	0	194243822	G	T	-0.03626	0.03247	0.166	0.05731	0.002137	0.20226
8	rs2912500	0	69944403	T	C	-0.01753	0.0364	0.2093	0.06431	0.002138	0.22683
3	rs9812718	0	157313589	A	G	-0.04589	0.03257	0.1539	0.05634	0.002142	0.19979
3	rs2041376	0	42439589	G	A	-0.03616	0.0326	0.1667	0.0575	0.002143	0.20286
9	rs4744244	0	96242455	T	C	-0.06599	0.05505	0.2797	0.09827	0.002147	0.34569
6	rs4382270	0	96159101	A	G	-0.005967	0.03271	0.1961	0.05714	0.002148	0.202067
5	rs4986593	0	142693846	G	A	0.06558	0.03641	-0.1634	0.06514	0.002148	-0.22898
11	rs2081612	0	12453041	T	C	-0.12	0.05793	0.2394	0.1018	0.002149	0.3594
5	rs17141747	0	116759655	G	A	-0.08435	0.06029	0.2832	0.1035	0.00215	0.36755
21	rs2837851	0	42205525	G	A	0.07942	0.0467	-0.2106	0.08218	0.002155	-0.29002
14	rs719572	0	89375600	T	C	0.07874	0.02996	-0.1066	0.05245	0.002157	-0.18534
5	rs4597914	0	53729982	A	G	-0.04873	0.03085	0.1426	0.05423	0.002158	0.19133
8	rs6558756	0	3153093	G	A	-0.1603	0.06725	0.2435	0.1132	0.002159	0.4038
11	rs2615043	0	15844653	C	T	-0.03737	0.033	0.1656	0.05738	0.002162	0.20297
1	rs4950740	0	202695165	A	G	0.1294	0.04266	-0.1347	0.07482	0.002167	-0.2641
10	rs2093558	0	98140048	A	C	0.01124	0.0304	-0.1773	0.05346	0.00217	-0.18854
17	rs6504452	0	64731402	A	G	-0.05793	0.03151	0.1383	0.05571	0.00217	0.19623
5	rs13167369	0	53772796	T	G	-0.02744	0.03988	0.2203	0.0703	0.002172	0.24774
6	rs9361779	0	64159064	C	A	0.0659	0.03023	-0.1201	0.05262	0.002174	-0.186
15	rs527834	0	34273277	A	G	-0.0268	0.06635	0.3841	0.1165	0.002177	0.4109
11	rs500112	0	100870494	G	A	0.06697	0.03166	-0.1285	0.05538	0.002179	-0.19547
3	rs789856	0	194329805	T	C	0.116	0.04565	-0.1708	0.08167	0.002179	-0.2868
11	rs1433897	0	4941904	A	G	0.09862	0.03049	-0.09202	0.05423	0.002182	-0.19064
2	rs4952242	0	32018734	C	T	0.06429	0.06462	-0.3356	0.1134	0.002187	-0.39989
11	rs10834426	0	24700655	A	G	-0.01346	0.04057	0.2349	0.07019	0.002188	0.24836
5	rs17209237	0	142657212	G	A	0.06247	0.03467	-0.1548	0.06185	0.002188	-0.21727
10	rs7905804	0	132852826	T	C	-0.00817	0.03294	-0.2111	0.05748	0.002188	-0.20293
3	rs792746	0	157375233	G	A	0.04633	0.03406	-0.1648	0.05991	0.002188	-0.21113
2	rs472614	0	169792421	A	G	0.08732	0.03001	-0.0992	0.05298	0.002189	-0.18652
2	rs3886740	0	135483960	T	G	-0.06008	0.02474	0.09229	0.04316	0.00219	0.15237
18	rs17084113	0	68948009	G	A	0.06529	0.03718	-0.1658	0.06565	0.002192	-0.23109
1	rs2300747	0	117104215	G	A	0.08214	0.04505	-0.1926	0.07759	0.002195	-0.27474
5	rs2963156	0	142758496	T	C	0.06334	0.03651	-0.1661	0.06544	0.002197	-0.22944
15	rs2673103	0	39520813	G	A	0.1077	0.03328	-0.09775	0.05827	0.002198	-0.20545
4	rs317903	0	16138165	T	C	-0.01246	0.02998	0.1729	0.05258	0.002198	0.18536
1	rs3863840	0	82934401	G	A	-0.05004	0.03272	0.1539	0.05803	0.002198	0.20394
16	rs4784390	0	54485833	G	T	0.04535	0.03349	-0.1632	0.05932	0.002198	-0.20855
14	rs7157953	0	33474811	C	T	-0.0605	0.03254	0.1425	0.05777	0.0022	0.203
1	rs10910427	0	234539157	T	C	-0.04701	0.03018	0.1407	0.05336	0.002202	0.18771
1	rs1340675	0	80386626	C	T	-0.125	0.06116	0.2482	0.1054	0.002202	0.3732
2	rs7593685	0	43215855	C	T	0.05407	0.03033	-0.1339	0.05339	0.002205	-0.18797
14	rs17098059	0	99406138	A	G	0.2271	0.07748	-0.2469	0.1341	0.002207	-0.474
12	rs2519540	0	119916900	G	A	0.02371	0.03972	-0.2203	0.06916	0.002214	-0.24401
21	rs2850147	0	44508718	C	T	0.04914	0.03051	-0.1414	0.05428	0.002216	-0.19054
11	rs585730	0	77880704	T	C	-0.1082	0.04559	0.1783	0.08183	0.002221	0.2865
5	rs12658017	0	36336334	C	A	0.08416	0.07028	-0.3516	0.1239	0.002225	-0.43576
11	rs4121881	0	63139493	A	G	0.06032	0.03074	-0.1294	0.05387	0.002225	-0.18972
6	rs9451856	0	92616418	G	A	0.03977	0.03078	-0.1508	0.05419	0.002227	-0.19057
6	rs1539403	0	112661896	T	G	0.04733	0.03226	-0.1529	0.05699	0.002232	-0.20023
12	rs11613784	0	109649012	A	G	0.02749	0.0383	-0.21	0.06757	0.002234	-0.23749
11	rs954237	0	62064715	T	C	-0.05182	0.03219	0.1464	0.0563	0.002234	0.19822
9	rs2296667	0	95274338	G	A	-0.004187	0.03088	0.1866	0.05423	0.002236	0.190787
22	rs2072711	0	37268555	A	G	0.04707	0.04022	-0.203	0.07127	0.002243	-0.25007
2	rs6430612	0	137006198	C	T	0.09805	0.03128	-0.09598	0.05525	0.002243	-0.19403
2	rs16985176	0	18697952	A	C	0.01767	0.04202	-0.2389	0.07269	0.002244	-0.25657
13	rs10507814	0	74024492	T	C	0.2008	0.07318	-0.2447	0.1261	0.002248	-0.4455
2	rs13415550	0	144352423	T	C	0.08676	0.03742	-0.1421	0.0649	0.002248	-0.22886
22	rs5768350	0	48494758	A	G	0.03198	0.04034	-0.2156	0.07028	0.002248	-0.24758
7	rs10274622	0	131942949	T	C	0.04459	0.04204	-0.2178	0.07487	0.002249	-0.26239
4	rs11731583	0	146061560	G	A	-0.01691	0.02996	-0.2027	0.05292	0.00225	-0.18579
11	rs1920667	0	15847373	T	G	-0.03544	0.03296	0.1666	0.05734	0.002254	0.20204
2	rs4148325	0	234673309	T	C	-0.05194	0.03206	0.1464	0.05649	0.002256	0.19834
11	rs7124169	0	2040997	C	T	-0.07153	0.03935	0.1706	0.06882	0.002257	0.24213
16	rs399943	0	84509700	T	G	-0.08661	0.03466	0.1261	0.06041	0.00226	0.21271
10	rs16914062	0	61511703	C	A	-0.06895	0.05925	0.3001	0.1053	0.002261	0.36905
2	rs841435	0	137340497	A	G	-0.1575	0.1217	0.5907	0.2127	0.002263	0.7482
13	rs9592096	0	61807409	T	C	-0.0487	0.0336	0.1568	0.05831	0.002264	0.2055
11	rs10160701	0	46551918	T	C	0.06047	0.03929	-0.1835	0.06959	0.002266	-0.24397
9	rs224025	0	20309831	T	C	-0.0754	0.03125	0.118	0.0551	0.002266	0.1934
1	rs10747410	0	102289362	A	G	0.06501	0.0311	-0.1258	0.05421	0.002267	-0.19081
20	rs16980954	0	19624373	C	T	0.1094	0.05807	-0.2498	0.1023	0.002267	-0.3592
13	rs4770118	0	21700503	A	C	-0.02067	0.02993	0.163	0.05221	0.002267	0.18367
21	rs3787968	0	43650387	G	A	0.03258	0.03025	-0.1552	0.05355	0.002268	-0.18778
15	rs7164080	0	34064798	A	G	0.06416	0.03038	-0.122	0.05288	0.00227	-0.18616
6	rs4710256	0	64368449	T	C	0.06813	0.03178	-0.1286	0.05606	0.002272	-0.19673
18	rs9966042	0	6184092	G	A	0.06679	0.05574	-0.2776	0.0981	0.002272	-0.34439
21	rs225446	0	43658508	T	C	0.04267	0.03022	-0.1442	0.05326	0.002273	-0.18687
9	rs7034070	0	28503578	G	A	-0.05405	0.0348	0.162	0.06166	0.002274	0.21605
7	rs7793336	0	1162222	T	C	-0.02923	0.03012	0.1584	0.05359	0.002274	0.18763
1	rs4650447	0	80484171	A	G	-0.0138	0.03124	0.1797	0.05516	0.002275	0.1935
2	rs6742078	0	234672639	T	G	-0.05137	0.03207	0.1468	0.05651	0.002282	0.19817
1	rs6664254	0	76235084	T	G	-0.02549	0.0336	0.1802	0.05846	0.002288	0.20569
9	rs12551145	0	133343744	A	G	-0.05666	0.06268	0.3342	0.1118	0.00229	0.39086
3	rs808725	0	44083188	T	C	-0.1012	0.03196	0.09392	0.05542	0.00229	0.19512
1	rs1887536	0	166962678	C	T	0.1099	0.05753	-0.2459	0.1015	0.002291	-0.3558
5	rs411840	0	81014958	C	T	-0.09686	0.03056	0.09167	0.05374	0.002291	0.18853
6	rs10945761	0	162065367	C	T	-0.07399	0.03311	0.1315	0.05871	0.002293	0.20549
7	rs1881116	0	1053958	T	C	0.005721	0.03215	-0.1938	0.05699	0.002294	-0.199521
1	rs6668200	0	179121280	A	G	0.0604	0.05157	-0.2576	0.09066	0.002295	-0.318
2	rs13033373	0	135520534	C	T	-0.05823	0.0283	0.1172	0.05008	0.002296	0.17543
17	rs12945508	0	49168871	G	T	-0.003658	0.03028	0.1836	0.05342	0.002297	0.187258
2	rs4148324	0	234672722	G	T	-0.05066	0.03207	0.1474	0.05651	0.002297	0.19806
8	rs13251967	0	24778956	C	T	-0.04511	0.03283	0.1572	0.05768	0.002298	0.20231
10	rs6480545	0	53648350	A	G	0.05506	0.03345	-0.1502	0.05844	0.002303	-0.20526
9	rs6415721	0	14964952	C	T	-0.04799	0.03207	0.1514	0.05701	0.002305	0.19939
13	rs12584909	0	42650632	A	G	0.04245	0.03933	-0.2036	0.07052	0.002307	-0.24605
21	rs225406	0	43699230	A	G	-0.07282	0.04921	0.2321	0.08712	0.00231	0.30492
6	rs28895187	0	32424380	A	G	0.09488	0.04104	-0.1571	0.07178	0.002311	-0.25198
2	rs4953938	0	135694848	G	A	0.07204	0.02575	-0.08529	0.04476	0.002312	-0.15733
10	rs953093	0	20827105	T	C	0.0496	0.05437	-0.287	0.09618	0.002312	-0.3366
2	rs7576306	0	202074528	G	A	0.08337	0.02988	-0.09989	0.0522	0.002313	-0.18326
14	rs17127615	0	54980192	A	G	-0.04741	0.05072	0.2717	0.09164	0.002315	0.31911
8	rs2205264	0	117011944	C	A	-0.06933	0.03036	0.1166	0.05293	0.002315	0.18593
13	rs235786	0	53359285	T	C	-0.01974	0.03034	0.167	0.05327	0.00232	0.18674
6	rs7745524	0	80432965	A	G	0.05779	0.03125	-0.1344	0.05481	0.002323	-0.19219
6	rs28895171	0	32423021	A	G	0.101	0.04111	-0.1512	0.0719	0.002326	-0.2522
15	rs17595461	0	91857951	G	A	-0.04271	0.03141	0.1504	0.05511	0.002327	0.19311
17	rs1860199	0	33129926	T	C	0.001243	0.02973	-0.1822	0.05241	0.002329	-0.183443
22	rs9615889	0	48843119	C	T	0.08796	0.03162	-0.1062	0.05538	0.00233	-0.19416
12	rs12820095	0	91833310	C	T	-0.09108	0.03557	0.1306	0.06353	0.002333	0.22168
10	rs6480911	0	80694189	G	A	-0.06953	0.03055	0.119	0.05388	0.002333	0.18853
6	rs6927596	0	105854300	A	C	0.02282	0.03164	-0.1709	0.05522	0.002335	-0.19372
10	rs942423	0	89323177	A	G	0.07007	0.02995	-0.1132	0.05224	0.002339	-0.18327
11	rs948256	0	127999326	C	A	0.0151	0.03205	-0.1833	0.05678	0.00234	-0.1984
3	rs3845227	0	116968649	T	C	-0.001269	0.03361	0.2073	0.05972	0.002341	0.208569
5	rs4957623	0	111197930	C	T	-0.021	0.03813	0.2143	0.06726	0.002342	0.2353
15	rs7176737	0	84651290	T	C	0.06119	0.03584	-0.158	0.06249	0.002342	-0.21919
16	rs11645986	0	25127645	G	A	0.03486	0.03621	-0.1882	0.06375	0.002345	-0.22306
3	rs4974255	0	60743058	A	C	-0.07382	0.03092	0.1163	0.0543	0.002346	0.19012
18	rs7243799	0	68843062	T	C	0.06442	0.04138	-0.1924	0.07359	0.002346	-0.25682
7	rs834100	0	137263481	T	C	0.2023	0.1437	-0.6279	0.2319	0.002346	-0.8302
3	rs4687721	0	51598254	G	A	-0.09068	0.04387	0.1724	0.07451	0.002347	0.26308
10	rs4397784	0	125840222	T	G	-0.09125	0.03729	0.1397	0.06615	0.00235	0.23095
2	rs4536641	0	222013644	A	G	0.1412	0.06901	-0.2897	0.1237	0.002352	-0.4309
1	rs628177	0	59869604	T	C	-0.05951	0.03299	0.1429	0.05778	0.002352	0.20241
1	rs5745325	0	76269460	A	G	-0.02743	0.03364	0.1776	0.05842	0.002354	0.20503
13	rs9515282	0	111439938	T	C	-0.1006	0.03518	0.1193	0.06315	0.002356	0.2199
5	rs6887452	0	148783767	G	T	0.07544	0.03216	-0.1222	0.05649	0.002357	-0.19764
9	rs2428003	0	136803249	T	C	-0.07918	0.07061	0.3546	0.1239	0.002358	0.43378
1	rs5744329	0	86940715	A	G	0.08706	0.03582	-0.1354	0.06379	0.00236	-0.22246
1	rs1931565	0	94596867	A	G	0.03379	0.03125	-0.1574	0.05455	0.002361	-0.19119
8	rs4870903	0	125570144	G	A	-0.05145	0.03435	0.1599	0.06045	0.002364	0.21135
14	rs798790	0	62037996	T	C	-0.04954	0.05528	0.2799	0.09321	0.002364	0.32944
10	rs7092615	0	30862180	T	C	0.0303	0.04838	-0.2661	0.08464	0.002365	-0.2964
4	rs12506519	0	94014156	C	A	-0.03113	0.03132	0.1625	0.05547	0.002373	0.19363
9	rs7026239	0	112419244	A	G	0.09082	0.03374	-0.1177	0.05975	0.002374	-0.20852
2	rs9288616	0	227603355	A	G	0.2581	0.07512	-0.2027	0.1317	0.002375	-0.4608
10	rs10887406	0	86704691	T	C	-0.08971	0.04199	0.1669	0.07329	0.002377	0.25661
1	rs12410046	0	23098982	A	G	-0.08198	0.05235	0.2403	0.09224	0.002379	0.32228
9	rs611698	0	4136715	C	T	0.0164	0.03402	-0.1928	0.05988	0.00238	-0.2092
6	rs6456614	0	24451256	A	G	-0.0599	0.03497	0.16	0.06339	0.002386	0.2199
7	rs7780081	0	30894983	C	T	-0.006166	0.03551	0.2098	0.06158	0.002386	0.215966
21	rs3787970	0	43651556	T	C	0.03331	0.0303	-0.1535	0.05354	0.002389	-0.18681
9	rs8067	0	95218829	T	G	0.0008102	0.03096	0.1911	0.05449	0.002389	0.1902898
21	rs3787972	0	43651705	C	T	0.03189	0.03027	-0.1548	0.0535	0.00239	-0.18669
1	rs743195	0	233127416	A	G	0.003218	0.03646	0.2266	0.06388	0.002392	0.223382
7	rs10235270	0	30894229	C	T	-0.05433	0.04102	0.1976	0.07213	0.002397	0.25193
3	rs579638	0	152778561	G	A	-0.04265	0.04221	0.2174	0.07454	0.002399	0.26005
16	rs33123	0	83852200	C	T	0.04035	0.03117	-0.151	0.0548	0.002406	-0.19135
9	rs10992471	0	95559505	A	G	-0.02404	0.03046	0.1618	0.05313	0.00241	0.18584
9	rs2147060	0	95160477	T	C	-0.03415	0.02984	0.1495	0.05265	0.002414	0.18365
5	rs6860990	0	81009067	A	G	-0.07402	0.04803	0.2205	0.08435	0.002414	0.29452
1	rs4661351	0	16414088	A	G	-0.05343	0.03218	0.1456	0.05717	0.002417	0.19903
4	rs12508689	0	120847421	G	A	0.05351	0.0315	-0.1406	0.05571	0.002419	-0.19411
20	rs282162	0	586955	G	T	-0.01527	0.0337	-0.2228	0.05955	0.00242	-0.20753
10	rs7897283	0	35075817	G	T	-0.1032	0.0356	0.115	0.06251	0.00242	0.2182
2	rs6724274	0	220334821	A	G	0.04998	0.02977	-0.1342	0.05294	0.002421	-0.18418
16	rs933716	0	57192149	C	T	-0.04033	0.03127	0.152	0.05517	0.002421	0.19233
1	rs3789422	0	94566311	T	C	-0.171	0.07857	0.313	0.1389	0.002423	0.484
8	rs666336	0	16714318	G	A	-0.01807	0.05386	0.3128	0.09488	0.002426	0.33087
8	rs7834004	0	26910150	T	C	0.04056	0.07228	0.4871	0.1283	0.002426	0.44654
5	rs13175020	0	40610506	G	T	-0.06096	0.03781	0.1724	0.06703	0.002429	0.23336
2	rs3811549	0	105153544	T	C	-0.2308	0.0946	0.3558	0.1688	0.002429	0.5866
18	rs512007	0	60568428	T	G	-0.04809	0.03064	0.1405	0.05414	0.002432	0.18859
21	rs2838008	0	42685044	T	C	0.06617	0.0325	-0.132	0.0567	0.002434	-0.19817
21	rs1501813	0	18632671	T	C	-0.03429	0.03422	0.1762	0.06042	0.002435	0.21049
9	rs12343846	0	8283676	C	T	-0.1823	0.0909	0.3824	0.1626	0.002436	0.5647
21	rs2839050	0	47326666	G	A	-0.04803	0.03324	0.1587	0.05957	0.002436	0.20673
20	rs4339026	0	31671599	G	A	-0.002944	0.03698	0.2226	0.06459	0.002438	0.225544
3	rs4234283	0	126935726	C	A	-0.1271	0.04171	0.1264	0.07252	0.00244	0.2535
9	rs16914315	0	112418293	A	G	0.09024	0.03374	-0.1177	0.05975	0.002443	-0.20794
10	rs7085454	0	125803303	C	T	-0.07791	0.03364	0.1301	0.05984	0.00245	0.20801
1	rs960603	0	205812614	T	C	-0.07777	0.03215	0.1185	0.05623	0.002451	0.19627
1	rs1010470	0	80454235	A	G	-0.02888	0.03231	0.1691	0.05684	0.002454	0.19798
3	rs4269071	0	10632832	G	A	0.1457	0.0516	-0.1758	0.09274	0.002456	-0.3215
8	rs1002142	0	131489046	C	A	0.03679	0.02989	-0.1458	0.05238	0.002461	-0.18259
5	rs2431097	0	159890885	T	C	-0.003638	0.03045	-0.191	0.05387	0.002462	-0.187362
10	rs1903950	0	54995173	T	C	-0.05047	0.03022	0.1343	0.05303	0.002464	0.18477
4	rs4974648	0	2307466	C	T	-0.03791	0.0344	0.174	0.06096	0.002468	0.21191
2	rs16822633	0	227646959	G	A	0.2561	0.07508	-0.2013	0.1312	0.002472	-0.4574
1	rs6593803	0	147205770	T	C	-0.01423	0.0339	0.1943	0.05996	0.002472	0.20853
15	rs8031045	0	52144304	A	G	-0.06201	0.04131	0.1931	0.07346	0.002474	0.25511
11	rs1441323	0	13129539	G	A	0.03922	0.04219	-0.2175	0.07359	0.002475	-0.25672
17	rs12453501	0	10110617	A	G	-0.05651	0.03858	0.1806	0.06818	0.002478	0.23711
1	rs17119433	0	59877775	A	G	-0.1145	0.05082	0.2015	0.09124	0.002478	0.316
3	rs2364910	0	158550968	G	A	0.01404	0.03021	-0.1706	0.05301	0.002483	-0.18464
7	rs1525079	0	14716865	A	G	-0.06931	0.03243	0.13	0.05735	0.002485	0.19931
9	rs1576587	0	112370353	T	G	0.01702	0.03051	0.2027	0.05327	0.002485	0.18568
10	rs4935027	0	53838761	A	G	0.008802	0.03196	-0.1867	0.05616	0.002485	-0.195502
21	rs4148107	0	43644331	C	T	0.05373	0.03094	-0.1356	0.05439	0.002486	-0.18933
2	rs7588418	0	173127669	C	T	-0.02769	0.03119	0.1638	0.05507	0.002486	0.19149
18	rs729964	0	47740938	G	A	0.06555	0.03	-0.1206	0.05373	0.002487	-0.18615
16	rs13329773	0	89023572	T	G	0.05854	0.03313	-0.1446	0.05841	0.002488	-0.20314
18	rs9676094	0	74227095	G	A	-0.05428	0.03324	0.1503	0.05891	0.002488	0.20458
2	rs11692549	0	194228442	A	G	-0.03488	0.03219	0.1629	0.05693	0.002492	0.19778
7	rs1468594	0	8122313	A	C	0.01272	0.03626	-0.2101	0.06413	0.002492	-0.22282
4	rs13138899	0	76232965	A	G	0.0572	0.0435	-0.207	0.07578	0.002494	-0.2642
9	rs4740826	0	5870703	C	T	-0.1195	0.04525	0.1575	0.07965	0.002495	0.277
7	rs10950195	0	62729224	G	A	-0.05809	0.03092	0.1311	0.05438	0.002497	0.18919
2	rs2177483	0	36120755	C	T	-0.07621	0.03258	0.1246	0.05788	0.002499	0.20081
13	rs2770909	0	61551100	T	C	0.02195	0.03966	-0.2235	0.07084	0.002499	-0.24545
20	rs6012755	0	48466166	A	G	-0.0493	0.06291	0.3277	0.1077	0.002502	0.377
3	rs6810326	0	140071249	T	C	-0.07896	0.02984	0.1033	0.05239	0.002502	0.18226
6	rs9494677	0	96246431	C	A	-0.03085	0.03045	0.1563	0.05391	0.002502	0.18715
5	rs153470	0	150598381	T	C	-0.02281	0.03871	0.2089	0.06618	0.002504	0.23171
5	rs586971	0	17193856	T	C	0.04505	0.03142	-0.1481	0.05563	0.002508	-0.19315
9	rs12686281	0	38713081	T	C	0.09016	0.05433	-0.2457	0.09697	0.002511	-0.33586
3	rs7355803	0	29441020	G	A	-0.007326	0.03161	0.1846	0.05509	0.002512	0.191926
6	rs9457437	0	159118978	C	T	0.05239	0.03005	-0.1299	0.05232	0.002513	-0.18229
7	rs10488129	0	10361188	T	C	0.07014	0.03186	-0.1243	0.05592	0.002516	-0.19444
9	rs4743489	0	104550927	G	A	-0.1098	0.08682	0.4211	0.1528	0.002517	0.5309
6	rs9368249	0	10316035	T	C	0.05134	0.03447	-0.1596	0.06074	0.002521	-0.21094
11	rs984783	0	38017896	T	C	-0.0406	0.03849	0.191	0.06632	0.002524	0.2316
13	rs1013545	0	73971803	C	T	0.04666	0.03555	-0.1697	0.06219	0.002525	-0.21636
11	rs1565224	0	45575697	A	C	0.01993	0.03326	0.2226	0.05828	0.002528	0.20267
18	rs17087084	0	70866907	T	C	0.09101	0.06024	-0.2828	0.1081	0.002529	-0.37381
13	rs2801749	0	19452658	G	A	-0.0482	0.07153	0.3903	0.1264	0.002533	0.4385
15	rs4410020	0	59723253	A	G	0.02431	0.03044	-0.1622	0.05374	0.002534	-0.18651
12	rs7969863	0	24318555	T	G	-0.04623	0.03982	-0.2876	0.06931	0.002534	-0.24137
1	rs3818788	0	32158374	T	C	0.04944	0.03094	-0.1407	0.05488	0.002537	-0.19014
12	rs7969091	0	49464449	G	A	0.04418	0.03014	-0.1409	0.05337	0.002537	-0.18508
1	rs7516108	0	152542229	T	C	0.0706	0.03309	-0.132	0.05842	0.00254	-0.2026
3	rs13095534	0	22594900	C	T	0.1005	0.0345	-0.11	0.0606	0.002541	-0.2105
18	rs2167240	0	68906842	T	G	0.06606	0.03937	-0.1761	0.0699	0.002541	-0.24216
2	rs579275	0	169780366	T	C	0.08646	0.02985	-0.0964	0.05272	0.002541	-0.18286
6	rs4870268	0	154472327	C	T	-0.008007	0.03038	0.1786	0.05385	0.002542	0.186607
20	rs6079602	0	14884301	G	A	0.01572	0.04505	-0.258	0.0787	0.002543	-0.27372
1	rs4385705	0	14876032	A	G	0.07727	0.02993	-0.1058	0.05276	0.002544	-0.18307
8	rs6558868	0	4206548	A	G	-0.04361	0.03025	0.142	0.05357	0.002549	0.18561
17	rs4796190	0	26203119	C	T	-0.02045	0.03082	0.1689	0.05465	0.00255	0.18935
22	rs739018	0	43826267	G	A	-0.0293	0.03031	0.1554	0.0532	0.002551	0.1847
3	rs2127655	0	51398958	A	G	-0.08658	0.04365	0.1734	0.0743	0.002553	0.25998
10	rs11596890	0	105794855	T	C	0.007122	0.05843	-0.3445	0.1009	0.002555	-0.351622
12	rs11168758	0	49245630	G	A	-0.05552	0.0333	0.1482	0.05875	0.002556	0.20372
11	rs11821838	0	89065017	T	C	0.0196	0.06643	-0.3844	0.1163	0.002561	-0.404
18	rs747699	0	54742664	G	A	-0.05924	0.0311	0.1294	0.05427	0.002564	0.18864
10	rs2369932	0	30860535	T	C	0.02847	0.04839	-0.2659	0.08479	0.00257	-0.29437
12	rs11051065	0	30919149	G	A	-0.1577	0.05508	0.1825	0.0985	0.002575	0.3402
13	rs1334952	0	19505180	G	A	-0.04012	0.07093	0.3934	0.1251	0.002575	0.43352
1	rs12354333	0	202604386	G	A	0.05569	0.0319	-0.139	0.05618	0.002578	-0.19469
13	rs9583266	0	109250314	A	G	-0.1332	0.03834	0.1005	0.06741	0.002584	0.2337
6	rs17760780	0	101988727	T	C	-0.002308	0.03721	-0.2315	0.06633	0.002585	-0.229192
3	rs1826351	0	97787260	C	A	-0.05151	0.03408	0.1535	0.05891	0.002586	0.20501
21	rs425232	0	47346525	T	G	-0.05164	0.0332	0.1535	0.05945	0.002589	0.20514
5	rs10039269	0	111143961	T	C	-0.009732	0.03575	0.2106	0.06382	0.002591	0.220332
6	rs210134	0	33540209	A	G	0.01198	0.03205	-0.1826	0.05608	0.002591	-0.19458
1	rs562580	0	77162485	T	C	0.008329	0.04675	-0.2787	0.08302	0.002591	-0.287029
21	rs2839634	0	44515685	C	T	-0.04036	0.02974	0.1423	0.05285	0.002596	0.18266
21	rs2838046	0	42898366	A	G	-0.06188	0.03029	0.1222	0.05311	0.002597	0.18408
13	rs1974254	0	104616045	G	A	-0.02294	0.03088	0.167	0.05498	0.002598	0.18994
1	rs4659660	0	236552530	A	G	0.02378	0.04898	0.3245	0.08702	0.002598	0.30072
8	rs16932129	0	66377699	A	G	-0.05676	0.04528	0.222	0.08072	0.0026	0.27876
4	rs990695	0	90441242	A	G	0.1213	0.04164	-0.1322	0.07317	0.002601	-0.2535
10	rs7072606	0	49933974	C	T	-0.1028	0.05931	0.2659	0.1071	0.002602	0.3687
3	rs1488762	0	119893257	G	A	0.05892	0.05544	-0.2778	0.09712	0.002604	-0.33672
2	rs1881881	0	123176322	C	T	0.08192	0.03053	-0.1041	0.05371	0.002605	-0.18602
3	rs11924760	0	31955806	G	A	0.06133	0.03076	0.2476	0.05368	0.002606	0.18627
2	rs4668598	0	9207028	G	T	0.01153	0.04716	-0.2727	0.08177	0.002607	-0.28423
3	rs13078019	0	80785415	A	C	-0.00388	0.03483	0.2083	0.06127	0.002611	0.21218
11	rs7124060	0	121435966	T	G	-0.1228	0.05726	0.2358	0.1045	0.002613	0.3586
19	rs8111766	0	51540228	C	A	-0.09291	0.03395	0.1147	0.06005	0.002614	0.20761
5	rs11739531	0	40629347	C	T	-0.07579	0.0318	0.117	0.05562	0.002617	0.19279
2	rs887829	0	234668570	T	C	-0.05104	0.03206	0.1444	0.05649	0.002617	0.19544
18	rs900968	0	43336920	A	G	-0.2549	0.07901	0.2462	0.1466	0.002618	0.5011
9	rs10435834	0	111640631	T	C	-0.05441	0.03147	0.1381	0.05569	0.002619	0.19251
11	rs3136456	0	46745861	A	C	0.07962	0.0578	-0.2817	0.1053	0.00262	-0.36132
9	rs2149002	0	112519888	G	A	-0.0668	0.03209	0.1294	0.05677	0.002623	0.1962
4	rs17058736	0	173598461	A	C	-0.05072	0.0492	0.2484	0.08638	0.002625	0.29912
11	rs3851173	0	84680391	G	A	-0.04222	0.02983	0.1397	0.05259	0.002626	0.18192
2	rs496550	0	169779712	T	C	0.08902	0.02983	-0.09305	0.05267	0.00263	-0.18207
18	rs8099090	0	71106985	C	T	0.06895	0.03041	-0.1159	0.05341	0.00263	-0.18485
3	rs11715829	0	146957166	C	T	0.05618	0.06015	-0.3068	0.1046	0.002632	-0.36298
11	rs17125523	0	121474239	G	A	0.182	0.09998	-0.4276	0.1763	0.002633	-0.6096
21	rs369977	0	16611077	T	C	-0.0398	0.03055	0.1468	0.05398	0.002633	0.1866
15	rs7168418	0	84655733	C	T	0.04891	0.03515	-0.1636	0.06131	0.002633	-0.21251
10	rs10509722	0	100278017	C	T	0.1149	0.05785	-0.2329	0.1001	0.002635	-0.3478
13	rs2287254	0	113891359	G	A	0.003231	0.03045	-0.182	0.05354	0.002635	-0.185231
9	rs10970061	0	31030836	A	G	0.1115	0.04516	-0.1609	0.07853	0.002637	-0.2724
10	rs7907793	0	20319192	A	G	0.05188	0.03723	-0.1752	0.06571	0.002638	-0.22708
6	rs9341791	0	80483731	A	G	0.03972	0.03033	-0.1429	0.05261	0.002639	-0.18262
7	rs34154333	0	45679021	G	A	0.1625	0.04489	-0.1077	0.07786	0.00264	-0.2702
4	rs6837219	0	139300738	C	T	-0.06433	0.03378	0.1414	0.05949	0.00264	0.20573
9	rs10761280	0	96569343	G	A	-0.03321	0.0316	0.1597	0.05586	0.002642	0.19291
12	rs4764629	0	101284899	T	G	-0.03997	0.03449	0.1684	0.06012	0.002642	0.20837
4	rs3843409	0	94034683	T	C	-0.03286	0.03109	0.1567	0.05484	0.002643	0.18956
4	rs10015978	0	79883086	T	G	0.06431	0.04695	-0.2245	0.08384	0.002649	-0.28881
4	rs2723054	0	102492986	G	A	0.08269	0.03008	-0.1013	0.05332	0.002649	-0.18399
6	rs6925255	0	80466124	A	G	-0.02849	0.03003	0.1539	0.05273	0.00265	0.18239
7	rs1357869	0	14636250	A	C	-0.08401	0.03003	0.09958	0.0532	0.002655	0.18359
7	rs12540123	0	1121188	T	C	0.07787	0.03308	-0.1214	0.05748	0.002657	-0.19927
15	rs8041896	0	96121944	A	G	0.1238	0.04983	-0.1756	0.0863	0.002659	-0.2994
13	rs9561731	0	95566676	T	C	0.03685	0.03583	-0.1809	0.06302	0.002661	-0.21775
22	rs452579	0	18495470	A	G	0.09102	0.03398	-0.1176	0.06057	0.002662	-0.20862
17	rs4790654	0	4495682	A	G	0.04218	0.0396	-0.1967	0.06895	0.002662	-0.23888
7	rs17809684	0	77831075	T	C	0.0513	0.03426	-0.1571	0.06031	0.002663	-0.2084
12	rs3782530	0	16163383	C	T	-0.1069	0.03382	0.09901	0.05961	0.002663	0.20591
22	rs2413398	0	36730947	T	G	-0.05989	0.03159	0.1332	0.05596	0.002664	0.19309
11	rs1440708	0	15848847	T	C	-0.03568	0.033	0.1632	0.0574	0.002665	0.19888
8	rs7829693	0	102842872	T	G	0.04516	0.03557	-0.1695	0.06197	0.002665	-0.21466
17	rs7213686	0	67453474	C	T	0.004283	0.03432	-0.2055	0.06082	0.002668	-0.209783
5	rs10075302	0	140682958	A	C	0.07205	0.06776	-0.3285	0.1149	0.002671	-0.40055
2	rs7574002	0	173124183	C	T	-0.02607	0.03114	0.1637	0.05497	0.002671	0.18977
17	rs2692343	0	10860619	C	A	-0.07017	0.03103	0.1178	0.05438	0.002674	0.18797
21	rs373267	0	47343320	A	C	-0.05175	0.03324	0.153	0.05954	0.002675	0.20475
8	rs7827110	0	68773513	G	T	-0.01067	0.03944	0.2319	0.07049	0.002675	0.24257
6	rs13213519	0	13452404	C	T	0.05915	0.04218	-0.1949	0.07333	0.002676	-0.25405
14	rs17185649	0	25556501	T	C	-0.1164	0.04152	0.1342	0.07242	0.002677	0.2506
3	rs814756	0	65753414	T	C	0.06631	0.03678	-0.1561	0.06429	0.002678	-0.22241
3	rs3851993	0	148188630	G	A	0.2222	0.04959	-0.07787	0.08677	0.002679	-0.30007
4	rs11941340	0	139550075	C	A	-0.006059	0.05924	-0.3712	0.1062	0.00268	-0.365141
5	rs512983	0	152895409	T	C	0.09115	0.03645	-0.1311	0.06443	0.002681	-0.22225
17	rs9894096	0	49180862	G	A	0.002937	0.03024	0.1876	0.05355	0.002681	0.184663
5	rs1379560	0	113645426	T	C	0.002842	0.03765	-0.2223	0.06485	0.002682	-0.225142
11	rs2513513	0	76261533	A	G	0.1223	0.03052	-0.06252	0.05347	0.002684	-0.18482
11	rs12576803	0	24668637	T	C	-0.04967	0.04268	0.204	0.07295	0.002686	0.25367
10	rs1555871	0	20179337	T	C	0.0786	0.03539	-0.1367	0.06238	0.002686	-0.2153
3	rs10936990	0	178800879	G	T	0.0572	0.03064	-0.1274	0.05332	0.002687	-0.1846
7	rs6973331	0	6652740	G	T	0.04867	0.07913	-0.4154	0.1328	0.002689	-0.46407
4	rs11734405	0	146081096	C	T	-0.0172	0.02991	-0.1994	0.05282	0.00269	-0.1822
3	rs4298011	0	80984958	G	A	-0.03035	0.03161	0.1598	0.05491	0.00269	0.19015
9	rs10979838	0	112112634	C	T	0.05119	0.05238	-0.2726	0.09434	0.002691	-0.32379
5	rs384943	0	160517753	C	T	0.04422	0.03423	-0.164	0.06038	0.002694	-0.20822
7	rs38555	0	81880696	T	G	-0.03666	0.0332	0.1646	0.05829	0.002694	0.20126
10	rs2249911	0	24837715	C	A	0.04131	0.03163	-0.1506	0.05558	0.002695	-0.19191
21	rs3787687	0	33247735	G	T	0.1319	0.08258	-0.3637	0.143	0.002695	-0.4956
3	rs6551405	0	89248023	T	C	0.1128	0.07048	-0.3153	0.1241	0.002696	-0.4281
14	rs871608	0	34157086	G	A	-0.03253	0.04249	0.223	0.07383	0.002699	0.25553
10	rs10776658	0	50143591	T	C	0.0681	0.03086	-0.1199	0.05453	0.002701	-0.188
7	rs1917939	0	96716864	T	C	-0.04299	0.03485	-0.2547	0.06137	0.002704	-0.21171
14	rs6574177	0	25559823	C	A	-0.03955	0.03347	0.1625	0.05847	0.002705	0.20205
11	rs7943194	0	84669998	C	T	-0.04706	0.03118	0.1426	0.05502	0.002705	0.18966
1	rs6661054	0	102294507	T	C	0.06456	0.03143	-0.1251	0.05486	0.002708	-0.18966
6	rs9459056	0	158411364	T	C	0.05477	0.03102	-0.1316	0.05384	0.002708	-0.18637
1	rs11165870	0	97895762	C	T	-0.01846	0.03021	0.1657	0.05347	0.002709	0.18416
11	rs11216067	0	116504377	G	A	-0.09891	0.04361	0.173	0.07951	0.00271	0.27191
13	rs2875680	0	74887058	G	A	0.05916	0.04238	-0.1973	0.07426	0.00271	-0.25646
5	rs16901305	0	1844498	T	C	0.1025	0.0503	-0.2095	0.09109	0.002713	-0.312
5	rs2936952	0	173806760	A	G	-0.05219	0.04647	0.2332	0.08305	0.002715	0.28539
13	rs9316060	0	21575001	G	T	-0.04899	0.03258	0.1479	0.05704	0.002716	0.19689
10	rs10764002	0	35053262	C	A	-0.1004	0.03392	0.1051	0.05961	0.002719	0.2055
12	rs12317689	0	67556780	A	G	0.1237	0.05546	-0.2144	0.09817	0.002719	-0.3381
15	rs4906933	0	25124705	A	C	0.01772	0.03308	0.2195	0.05861	0.002719	0.20178
6	rs679670	0	138137551	C	T	0.06233	0.03225	-0.1321	0.05626	0.002719	-0.19443
3	rs1386897	0	112105769	C	A	-0.05636	0.09	0.4773	0.1536	0.002721	0.53366
4	rs1354296	0	94075263	A	G	-0.01238	0.03026	0.1716	0.0534	0.002724	0.18398
11	rs2856244	0	114115641	A	G	-0.02107	0.03164	0.1727	0.05638	0.002726	0.19377
5	rs4151700	0	140782160	T	G	0.08737	0.07278	-0.3511	0.1269	0.002726	-0.43847
6	rs9322361	0	152459143	G	A	0.08004	0.03999	-0.1632	0.07061	0.002726	-0.24324
7	rs12532786	0	51377189	T	C	0.003341	0.02992	-0.1795	0.05318	0.002728	-0.182841
14	rs7143061	0	100100164	A	G	0.06113	0.0336	-0.1438	0.05956	0.002732	-0.20493
18	rs17686332	0	62683556	T	C	-0.05963	0.02983	0.1212	0.05246	0.002736	0.18083
15	rs4483799	0	59723265	G	T	0.02377	0.03043	-0.1612	0.05373	0.002738	-0.18497
10	rs11003466	0	54982181	T	G	-0.06114	0.03011	0.1212	0.05292	0.00274	0.18234
12	rs896513	0	130240775	T	C	0.07838	0.03101	-0.1078	0.05387	0.002743	-0.18618
4	rs4697275	0	22237340	G	T	0.02014	0.02982	-0.1619	0.05295	0.002744	-0.18204
1	rs12127587	0	88090813	A	G	-0.07515	0.04296	0.1849	0.07546	0.002745	0.26005
9	rs17256174	0	83100591	G	A	0.09204	0.06	-0.2689	0.1045	0.002745	-0.36094
2	rs17027263	0	86687088	T	C	-0.128	0.0827	0.3588	0.1399	0.002746	0.4868
6	rs9400467	0	111424015	C	T	0.06005	0.0331	-0.1395	0.05782	0.002746	-0.19955
2	rs478333	0	169779156	G	A	0.0849	0.0299	-0.09675	0.05278	0.002749	-0.18165
20	rs6046168	0	19522665	T	C	0.009767	0.02978	-0.172	0.05289	0.002751	-0.181767
6	rs9369686	0	47379843	T	C	0.04941	0.03616	-0.1708	0.06404	0.002752	-0.22021
10	rs2275038	0	121190846	A	G	-0.09729	0.1109	0.5875	0.2001	0.002756	0.68479
1	rs1050036	0	167887436	C	A	0.1228	0.05202	-0.1947	0.09241	0.002757	-0.3175
1	rs10918798	0	167887642	T	C	0.1228	0.05202	-0.1947	0.09241	0.002757	-0.3175
4	rs7677987	0	58020760	A	G	0.02298	0.03447	-0.1872	0.06116	0.002759	-0.21018
17	rs8067877	0	64731178	C	T	-0.05405	0.03095	0.1334	0.05445	0.002761	0.18745
3	rs7432792	0	70482080	G	A	0.04261	0.03025	-0.1393	0.05273	0.002763	-0.18191
5	rs2407209	0	121826941	A	G	0.05085	0.0313	-0.139	0.05517	0.002765	-0.18985
9	rs10858265	0	137543874	C	T	-0.01211	0.03043	-0.1985	0.05433	0.00277	-0.18639
1	rs4660187	0	41799160	A	G	0.005617	0.03126	-0.1838	0.05504	0.002771	-0.189417
2	rs497692	0	169789016	T	C	0.08554	0.0298	-0.09539	0.05261	0.002771	-0.18093
4	rs1114531	0	183044054	C	T	-0.008499	0.04996	0.2924	0.08726	0.002772	0.300899
8	rs982330	0	56298109	T	C	0.02213	0.03019	-0.1621	0.05366	0.002773	-0.18423
18	rs1612736	0	47744743	C	T	0.06275	0.02995	-0.1209	0.05358	0.002775	-0.18365
10	rs2146544	0	112658964	T	G	0.09797	0.07131	-0.3333	0.1253	0.002775	-0.43127
13	rs2183456	0	66798610	T	G	-0.05467	0.02997	0.1282	0.05328	0.002775	0.18287
22	rs9609025	0	31032076	A	G	0.02806	0.09055	-0.5197	0.1591	0.002775	-0.54776
4	rs1369355	0	54446860	A	G	-0.09382	0.03511	0.1188	0.06182	0.002778	0.21262
6	rs1322422	0	95176359	C	T	0.05453	0.03053	-0.13	0.05359	0.002779	-0.18453
6	rs9349215	0	42039487	C	T	0.1054	0.03079	-0.08131	0.05431	0.002779	-0.18671
19	rs9419	0	39322087	T	G	0.05901	0.02989	-0.1236	0.05323	0.00278	-0.18261
4	rs10516298	0	16164230	C	T	0.07983	0.0366	-0.1427	0.06479	0.002781	-0.22253
10	rs11818884	0	29081724	T	C	-0.05926	0.05355	0.2625	0.0933	0.002781	0.32176
6	rs6941397	0	133980726	A	G	0.02955	0.04157	-0.2219	0.07309	0.002782	-0.25145
5	rs10942150	0	25962632	G	A	-0.01021	0.03253	-0.2061	0.05685	0.002788	-0.19589
3	rs9868399	0	55789724	T	C	-0.09172	0.03338	0.1125	0.05961	0.002794	0.20422
14	rs9805891	0	37457827	G	A	-0.06547	0.0376	0.1612	0.06585	0.002798	0.22667
16	rs11642698	0	74073632	C	T	-0.1324	0.03373	0.07244	0.05966	0.002805	0.20484
10	rs1255372	0	42991780	T	C	-0.07958	0.03068	0.107	0.05439	0.002809	0.18658
3	rs10865656	0	70857460	C	T	0.03361	0.03087	-0.1523	0.05403	0.00281	-0.18591
11	rs329654	0	133852608	C	T	0.1093	0.04983	-0.1876	0.08599	0.002811	-0.2969
4	rs1365162	0	75993726	A	G	0.08768	0.0322	-0.1063	0.05641	0.002819	-0.19398
1	rs6604915	0	83066525	C	T	-0.04583	0.03094	0.1418	0.05469	0.00282	0.18763
2	rs6754115	0	109962344	T	C	-0.001862	0.03097	-0.1904	0.05499	0.002821	-0.188538
9	rs10821131	0	96228822	T	C	0.03808	0.02993	-0.1434	0.05289	0.002822	-0.18148
10	rs10996325	0	53009688	A	G	-0.07398	0.06264	0.3072	0.1112	0.002823	0.38118
1	rs876740	0	3037613	T	C	0.03799	0.03112	-0.1493	0.05446	0.002823	-0.18729
3	rs6437403	0	194059425	G	A	0.03717	0.03507	-0.1745	0.06159	0.002825	-0.21167
2	rs3768751	0	46346716	C	T	-0.06213	0.03479	0.1474	0.06093	0.002826	0.20953
6	rs4713731	0	33945921	G	A	-0.08468	0.03408	0.1213	0.05998	0.002826	0.20598
11	rs3136435	0	46742426	A	G	0.07439	0.05767	-0.2836	0.1051	0.002827	-0.35799
2	rs551754	0	169787686	C	T	0.08976	0.02984	-0.09105	0.05271	0.002833	-0.18081
6	rs4870302	0	150449865	A	G	0.1781	0.0593	-0.1682	0.09969	0.002835	-0.3463
3	rs4856953	0	66636185	C	T	-0.08034	0.05738	0.2605	0.09876	0.002841	0.34084
2	rs631922	0	224643391	G	A	0.1156	0.04697	-0.1639	0.08103	0.002842	-0.2795
5	rs2067096	0	111820871	T	C	0.05298	0.03801	-0.1774	0.06718	0.002844	-0.23038
10	rs10764038	0	19769651	G	A	-0.1118	0.03844	0.1192	0.06721	0.002845	0.231
4	rs17028403	0	152943626	A	G	0.0705	0.05504	-0.2668	0.09873	0.002847	-0.3373
3	rs17799480	0	159259124	G	A	0.1182	0.0514	-0.1881	0.08886	0.002847	-0.3063
3	rs6551408	0	89270738	C	T	0.1128	0.07048	-0.3128	0.124	0.002847	-0.4256
15	rs12324117	0	29238202	C	T	0.05723	0.04701	-0.2223	0.08104	0.002848	-0.27953
14	rs7150733	0	99461932	A	C	-0.08697	0.045	0.18	0.07734	0.002848	0.26697
9	rs7023577	0	96336993	T	C	-0.04622	0.03025	0.1378	0.05375	0.002849	0.18402
1	rs1863618	0	81450244	G	A	0.01708	0.03071	-0.1681	0.05395	0.00285	-0.18518
15	rs7171889	0	94576182	G	T	0.002772	0.05499	0.3306	0.09511	0.00285	0.327828
14	rs974845	0	25566203	T	C	-0.03768	0.03348	0.1636	0.05857	0.002851	0.20128
18	rs11081148	0	4771550	G	A	0.0477	0.07296	-0.3974	0.1301	0.002852	-0.4451
5	rs9314117	0	93891091	C	T	0.02528	0.0315	-0.1647	0.05536	0.002852	-0.18998
8	rs2211704	0	37381976	G	A	0.119	0.07646	-0.3466	0.1361	0.002855	-0.4656
4	rs1907155	0	155361244	T	G	-0.02302	0.03021	0.1601	0.05345	0.002858	0.18312
2	rs16866884	0	9227762	T	G	-0.01086	0.03721	-0.2343	0.06501	0.002859	-0.22344
3	rs13085694	0	20023990	G	A	-0.03175	0.03187	0.1605	0.05602	0.002861	0.19225
10	rs11814112	0	1694750	T	C	-0.1422	0.05662	0.1955	0.09808	0.002863	0.3377
7	rs2949192	0	1203841	G	A	-0.04596	0.03099	0.1418	0.05482	0.002866	0.18776
7	rs13224488	0	1052353	A	C	0.03702	0.0363	-0.1825	0.06406	0.002867	-0.21952
15	rs4306482	0	92487758	A	G	-0.03618	0.03194	0.1579	0.05673	0.002868	0.19408
3	rs17435554	0	104106742	T	C	0.1512	0.07717	-0.2918	0.127	0.00287	-0.443
6	rs2033530	0	40347918	G	A	-0.01749	0.03044	0.1682	0.05435	0.00287	0.18569
7	rs12668777	0	123633233	G	A	-0.07264	0.04792	0.2158	0.08406	0.002875	0.28844
7	rs2288651	0	150825492	G	A	0.0568	0.03151	-0.1332	0.05539	0.002875	-0.19
14	rs7161544	0	21623648	G	A	-0.04539	0.03207	0.1463	0.05577	0.002883	0.19169
1	rs4330872	0	24476370	C	T	0.05496	0.0443	-0.2145	0.07883	0.002887	-0.26946
8	rs4875592	0	3168573	T	C	-0.1705	0.07069	0.2387	0.1178	0.002888	0.4092
10	rs7906425	0	18299628	G	A	0.01925	0.03017	-0.1619	0.05279	0.002889	-0.18115
10	rs10996331	0	53010887	A	G	-0.07522	0.0626	0.3048	0.1112	0.00289	0.38002
1	rs11800726	0	226523560	T	C	0.06071	0.03387	-0.1429	0.05935	0.002891	-0.20361
6	rs1889508	0	6535234	A	G	-0.04839	0.03248	0.1477	0.05724	0.002891	0.19609
1	rs12035525	0	85529523	A	C	0.1893	0.07153	-0.2308	0.1215	0.002892	-0.4201
6	rs4445042	0	64139997	G	A	0.07614	0.02997	-0.1037	0.0524	0.002893	-0.17984
14	rs8008501	0	90584281	C	T	0.0125	0.03025	-0.1698	0.05319	0.002895	-0.1823
11	rs4757365	0	15815555	T	C	0.04907	0.03306	-0.1504	0.05825	0.002896	-0.19947
2	rs2268359	0	49205110	A	G	0.1233	0.04921	-0.1729	0.08642	0.002897	-0.2962
7	rs739627	0	24853496	T	C	0.03704	0.03116	-0.1508	0.05483	0.002897	-0.18784
7	rs7791484	0	154156519	A	G	0.005955	0.03064	-0.1782	0.05369	0.002897	-0.184155
14	rs3809461	0	105058498	A	G	0.06115	0.04415	-0.2067	0.07835	0.002899	-0.26785
2	rs503931	0	169785449	A	C	0.08361	0.02988	-0.09705	0.05279	0.002899	-0.18066
15	rs2567440	0	96276516	G	T	-0.01581	0.03368	0.1856	0.05865	0.002904	0.20141
12	rs11044710	0	19756366	C	A	-0.1481	0.06196	0.2215	0.1075	0.002905	0.3696
10	rs1561439	0	80698200	C	A	-0.08182	0.03045	0.1023	0.0538	0.002906	0.18412
3	rs1374679	0	63075267	C	T	0.03258	0.03046	-0.15	0.05322	0.002907	-0.18258
1	rs2152391	0	80508854	A	G	-0.01565	0.03124	0.1731	0.05516	0.002907	0.18875
9	rs10156461	0	18818890	T	C	0.1312	0.04661	-0.1524	0.08308	0.002908	-0.2836
2	rs10195724	0	104549992	A	G	0.1195	0.1276	-0.7047	0.2457	0.002911	-0.8242
16	rs33125	0	83851073	T	C	0.03845	0.03119	-0.1493	0.0548	0.002912	-0.18775
7	rs42019	0	83248171	T	C	-0.008307	0.03158	0.1825	0.05577	0.002912	0.190807
9	rs4837752	0	123056637	A	G	0.1593	0.06605	-0.2459	0.1191	0.002916	-0.4052
11	rs11227700	0	66899180	A	G	0.2071	0.1287	-0.5474	0.2184	0.002917	-0.7545
9	rs10960278	0	11820083	G	A	-0.04674	0.03384	0.1561	0.05915	0.002919	0.20284
18	rs11151547	0	67600991	C	T	0.06601	0.03067	-0.1179	0.05368	0.002923	-0.18391
4	rs4147045	0	18795330	C	T	-0.1304	0.04691	0.1526	0.08271	0.002924	0.283
19	rs11672155	0	30357635	G	A	0.05637	0.03222	-0.1358	0.056	0.002928	-0.19217
2	rs519887	0	169780885	T	C	0.08815	0.02988	-0.09222	0.05275	0.002931	-0.18037
14	rs11621043	0	26438059	C	A	0.1294	0.04819	-0.1647	0.08634	0.002933	-0.2941
7	rs17172499	0	45251293	A	C	0.08018	0.03415	-0.1251	0.05997	0.002936	-0.20528
14	rs8009967	0	95510787	A	G	0.0002922	0.0337	0.2028	0.05917	0.002936	0.2025078
19	rs10421500	0	49186717	C	T	-0.02778	0.04416	0.2367	0.07719	0.002938	0.26448
2	rs41002	0	8113921	C	T	0.03594	0.02993	-0.1448	0.05287	0.002939	-0.18074
17	rs4889782	0	78640510	C	T	0.07481	0.03103	-0.113	0.055	0.002939	-0.18781
9	rs11791761	0	112394924	G	T	0.0669	0.04434	-0.2	0.07802	0.002942	-0.2669
4	rs13144344	0	185776616	A	G	0.04397	0.03076	-0.1422	0.05454	0.002943	-0.18617
10	rs7072257	0	86712634	C	T	-0.08362	0.04198	0.1674	0.07325	0.002943	0.25102
1	rs1597181	0	105111413	A	G	0.04873	0.03058	-0.1351	0.05373	0.002945	-0.18383
8	rs2705215	0	17000463	A	C	-0.03707	0.03117	0.1518	0.05534	0.002945	0.18887
12	rs4765914	0	2420377	T	C	0.07491	0.03711	-0.1477	0.06504	0.002947	-0.22261
3	rs865235	0	55472156	A	G	0.006312	0.0332	-0.1925	0.05803	0.002947	-0.198812
17	rs7219095	0	1710592	T	C	0.04683	0.03706	-0.1769	0.06548	0.002949	-0.22373
7	rs8591	0	1036799	A	G	0.03896	0.03641	-0.1804	0.06417	0.002952	-0.21936
6	rs9350824	0	80438871	T	G	-0.02942	0.03039	0.1521	0.05297	0.002952	0.18152
3	rs4553961	0	2636747	G	A	0.04337	0.0329	-0.1541	0.05772	0.002954	-0.19747
10	rs12269573	0	81670414	A	G	-0.04577	0.04792	0.2387	0.08284	0.002957	0.28447
6	rs199048	0	23497530	T	C	-0.06256	0.03381	0.1407	0.05945	0.002957	0.20326
20	rs4813361	0	19488952	G	A	0.01782	0.03738	-0.2066	0.06559	0.002958	-0.22442
10	rs12779447	0	6364754	A	G	-0.03922	0.03887	0.1956	0.0688	0.00296	0.23482
8	rs7826532	0	53488242	A	G	-0.06617	0.02978	0.1137	0.05268	0.00296	0.17987
2	rs3769827	0	202102685	A	G	-0.07922	0.03006	0.1009	0.05265	0.002962	0.18012
12	rs12424214	0	97769705	A	G	-0.02469	0.04109	0.2225	0.07232	0.002965	0.24719
5	rs7704730	0	110478926	A	G	0.1031	0.05294	-0.2133	0.09242	0.002965	-0.3164
4	rs9884442	0	142291626	C	T	-0.09177	0.06717	0.3068	0.1161	0.002965	0.39857
11	rs7114844	0	116496187	A	G	0.05937	0.0351	-0.1526	0.0621	0.002967	-0.21197
8	rs10956533	0	131502886	G	A	0.02672	0.03039	-0.1549	0.05303	0.002968	-0.18162
10	rs11596680	0	20208483	G	A	-0.06491	0.03265	0.1319	0.05763	0.002968	0.19681
8	rs6997195	0	131480540	G	A	0.05253	0.03034	-0.13	0.05343	0.002968	-0.18253
21	rs2830841	0	28667108	G	A	-0.02991	0.02998	0.1518	0.05334	0.002974	0.18171
3	rs2117046	0	448527	T	C	-0.2648	0.09866	0.3347	0.1761	0.002975	0.5995
10	rs16920624	0	20810525	G	T	0.07734	0.06686	-0.3214	0.1164	0.002976	-0.39874
17	rs3785617	0	64219015	C	T	-0.09672	0.0306	0.08651	0.05357	0.002976	0.18323
1	rs4650503	0	81448130	A	G	0.01752	0.03075	-0.167	0.05397	0.002976	-0.18452
17	rs17673578	0	66657636	A	G	-0.06815	0.04821	0.221	0.08459	0.002977	0.28915
6	rs2477831	0	41443689	T	C	-0.02709	0.04315	0.2319	0.07578	0.002977	0.25899
22	rs9620654	0	27430724	A	G	-0.01298	0.05113	-0.3194	0.0896	0.002979	-0.30642
14	rs7159694	0	85864692	C	T	-0.06311	0.03129	0.1246	0.05492	0.002981	0.18771
5	rs12659150	0	25931434	T	C	-0.01055	0.0325	-0.2048	0.05676	0.002983	-0.19425
15	rs2414428	0	56007695	C	T	0.09351	0.0495	-0.2027	0.08662	0.002983	-0.29621
8	rs2360235	0	53729375	C	A	-0.063	0.03	0.1178	0.05298	0.002984	0.1808
18	rs11873008	0	71104597	C	T	0.07302	0.03044	-0.1097	0.05347	0.002986	-0.18272
17	rs3816754	0	33433849	T	G	-0.03502	0.07642	0.4218	0.1336	0.002994	0.45682
11	rs5743867	0	1328351	G	A	0.01322	0.05725	0.3557	0.1002	0.002995	0.34248
9	rs12553961	0	11891381	T	G	0.02846	0.09904	-0.5836	0.1809	0.002996	-0.61206
7	rs17503262	0	146043176	G	A	0.05371	0.03763	-0.1726	0.06633	0.002996	-0.22631
10	rs7895907	0	50177420	A	C	0.09488	0.05275	-0.2203	0.09216	0.002998	-0.31518
18	rs8097175	0	47742104	A	G	0.06544	0.03003	-0.1174	0.05379	0.002998	-0.18284
8	rs11776162	0	135506830	C	T	-0.08748	0.03277	0.1078	0.05706	0.002999	0.19528
4	rs13108102	0	79198744	G	A	-0.01075	0.03126	0.1776	0.05525	0.003	0.18835
9	rs7866259	0	1350453	T	C	-0.04471	0.03111	0.1424	0.05486	0.003	0.18711
7	rs9655107	0	13725443	T	C	-0.01552	0.03029	0.1687	0.05419	0.003004	0.18422
6	rs6458238	0	41717705	A	G	-0.1416	0.05707	0.1994	0.09975	0.003006	0.341
9	rs10121384	0	36968880	T	C	0.006208	0.0355	-0.206	0.06208	0.003007	-0.212208
5	rs2060214	0	137958314	C	T	0.178	0.06312	-0.1966	0.1093	0.003007	-0.3746
1	rs2817178	0	3047252	C	T	0.02254	0.03189	-0.1672	0.05545	0.003007	-0.18974
18	rs1183856	0	62817889	A	G	-0.0607	0.03018	0.1214	0.05344	0.003009	0.1821
3	rs13068024	0	68728821	A	G	0.09823	0.03831	-0.1292	0.06638	0.003009	-0.22743
1	rs2749418	0	41509674	T	C	0.001144	0.02999	-0.1796	0.05304	0.003011	-0.180744
17	rs11655080	0	64281193	G	A	-0.08047	0.03016	0.09997	0.05282	0.003013	0.18044
2	rs1474407	0	141757246	T	C	-0.1059	0.03409	0.09837	0.05986	0.003017	0.20427
10	rs3818833	0	97442308	C	T	-0.01195	0.05873	0.3434	0.1044	0.003019	0.35535
1	rs7519343	0	158403819	T	C	0.3155	0.1316	-0.4565	0.2246	0.003019	-0.772
10	rs7072441	0	81684075	G	T	-0.03759	0.03524	0.1712	0.06094	0.00302	0.20879
1	rs1864570	0	68604773	G	A	-0.4507	0.1559	0.394	0.2384	0.003022	0.8447
7	rs12531029	0	4293056	G	A	0.06682	0.03475	-0.1424	0.0614	0.003024	-0.20922
15	rs8029144	0	29238573	A	G	0.07023	0.04766	-0.211	0.08201	0.003024	-0.28123
11	rs7114792	0	101137948	T	C	0.05378	0.0342	-0.151	0.05999	0.003025	-0.20478
18	rs2457971	0	47739631	C	T	0.0619	0.03002	-0.1205	0.0537	0.003027	-0.1824
2	rs6432083	0	10414143	G	A	-0.1013	0.04773	0.1883	0.08524	0.003032	0.2896
17	rs1914367	0	36180717	A	C	0.04357	0.03374	-0.1572	0.05874	0.003033	-0.20077
10	rs1426621	0	90095729	G	T	0.02718	0.03185	-0.1635	0.0559	0.003034	-0.19068
11	rs11235465	0	71914145	G	A	-0.04391	0.06072	0.3175	0.1057	0.003035	0.36141
1	rs2132177	0	4283315	C	A	0.2385	0.09776	-0.3502	0.1729	0.003036	-0.5887
18	rs1158869	0	70843010	T	C	0.1025	0.05394	-0.223	0.09563	0.003037	-0.3255
12	rs1732664	0	79747487	T	C	0.04623	0.0338	-0.1557	0.05915	0.003037	-0.20193
1	rs6424682	0	80514544	G	T	-0.01385	0.03127	0.1742	0.05521	0.003037	0.18805
1	rs10915975	0	226521192	T	C	0.02486	0.0298	-0.154	0.05246	0.00304	-0.17886
7	rs6968714	0	67556056	A	G	-0.03702	0.0335	-0.2376	0.0588	0.00304	-0.20058
16	rs7203042	0	25106359	C	T	0.05931	0.03014	-0.1204	0.05264	0.00304	-0.17971
14	rs9323803	0	87783023	T	C	0.07439	0.03009	-0.1064	0.05306	0.00304	-0.18079
21	rs2839444	0	43454614	T	C	-0.07846	0.03572	0.1379	0.06367	0.003042	0.21636
11	rs7111524	0	25841229	G	T	0.04524	0.03555	-0.1673	0.0623	0.003042	-0.21254
12	rs7953710	0	115667118	T	C	-0.05182	0.02977	0.1269	0.05246	0.003043	0.17872
10	rs17462455	0	34525999	C	T	0.1108	0.0517	-0.198	0.09049	0.003045	-0.3088
8	rs3019920	0	108068283	T	C	-0.1005	0.03693	0.1208	0.06492	0.003045	0.2213
11	rs4754642	0	99619383	C	T	0.05634	0.03854	-0.1747	0.06779	0.003047	-0.23104
8	rs7001375	0	125594916	G	A	-0.05638	0.03198	0.1353	0.05624	0.003048	0.19168
9	rs17256298	0	83104358	A	C	0.09567	0.05996	-0.2613	0.1045	0.003049	-0.35697
6	rs6568729	0	112610724	G	A	-0.04346	0.02993	0.1352	0.05236	0.003055	0.17866
5	rs2929711	0	17194395	G	A	0.04536	0.03148	-0.1445	0.05583	0.003058	-0.18986
14	rs1006888	0	93418952	C	T	-0.03619	0.03898	0.1976	0.06864	0.003059	0.23379
17	rs4790207	0	4502310	G	T	0.03763	0.03244	-0.1565	0.05695	0.00306	-0.19413
12	rs11106143	0	91820821	T	C	-0.06362	0.04379	0.1988	0.07702	0.003061	0.26242
14	rs2022730	0	37459015	C	T	-0.06414	0.03754	0.1601	0.06577	0.003062	0.22424
7	rs2686528	0	22340865	A	G	-0.05547	0.03573	0.1599	0.06334	0.003062	0.21537
1	rs4949953	0	97904780	C	T	-0.01958	0.03018	0.1619	0.05334	0.003064	0.18148
4	rs12511715	0	173686773	T	C	-0.04211	0.0483	0.2487	0.08551	0.003066	0.29081
8	rs12550311	0	125707677	T	C	0.03462	0.03573	-0.1774	0.06204	0.003067	-0.21202
3	rs789857	0	194330250	C	T	0.1192	0.0455	-0.1568	0.08138	0.003067	-0.276
2	rs1912196	0	215050520	T	G	-0.05148	0.03374	0.1514	0.05965	0.003069	0.20288
5	rs2246518	0	164942881	A	G	0.09971	0.05825	-0.2511	0.1032	0.003071	-0.35081
13	rs17752530	0	28406251	A	G	-0.0984	0.03632	0.1233	0.0655	0.003074	0.2217
13	rs4770114	0	21682068	T	C	-0.07318	0.03056	0.1104	0.05397	0.003074	0.18358
6	rs2647405	0	76450023	C	T	0.1155	0.04146	-0.1275	0.07085	0.003077	-0.243
3	rs11926232	0	55936417	G	A	-0.1668	0.0692	0.2411	0.1192	0.003078	0.4079
4	rs6857026	0	80773461	T	C	-0.095	0.03301	0.1025	0.05802	0.003086	0.1975
15	rs7177611	0	61372759	A	G	-0.07114	0.03368	0.1315	0.05964	0.003086	0.20264
2	rs17034279	0	67962437	A	G	0.05824	0.03656	-0.1589	0.06363	0.003088	-0.21714
2	rs1896477	0	137508544	T	C	0.07216	0.04684	-0.2075	0.08209	0.003091	-0.27966
3	rs6548823	0	82558381	C	T	0.03201	0.03012	-0.1489	0.05321	0.003093	-0.18091
5	rs10064364	0	121372369	T	C	-0.3562	0.1622	0.5674	0.2668	0.003095	0.9236
6	rs2813544	0	152425582	G	A	0.06598	0.03662	-0.155	0.06512	0.003095	-0.22098
9	rs4360376	0	92074429	C	A	0.02437	0.03638	-0.1941	0.06426	0.003097	-0.21847
11	rs10839563	0	6434317	C	A	0.05454	0.03579	-0.1596	0.06291	0.003098	-0.21414
18	rs2215503	0	25890637	G	A	0.03184	0.03108	-0.155	0.05498	0.003098	-0.18684
18	rs12604169	0	59583446	A	G	0.05042	0.03228	-0.1417	0.05637	0.003109	-0.19212
5	rs6887435	0	161454458	G	A	-0.0445	0.05405	0.2752	0.09367	0.003111	0.3197
10	rs10509549	0	90214993	C	T	0.01166	0.0334	-0.1886	0.05892	0.003113	-0.20026
2	rs4954159	0	135426782	A	G	-0.05818	0.02556	0.09434	0.04481	0.003113	0.15252
2	rs853785	0	169802594	C	T	0.08643	0.0303	-0.09538	0.05352	0.003114	-0.18181
1	rs1417609	0	119977806	G	A	0.06272	0.04745	-0.2202	0.08311	0.003115	-0.28292
4	rs4253308	0	187174363	C	A	0.06835	0.03072	-0.1153	0.05399	0.003115	-0.18365
20	rs11698208	0	31985883	T	C	0.1966	0.08623	-0.3132	0.1494	0.003116	-0.5098
8	rs7010684	0	4194916	A	G	-0.04803	0.03019	0.1333	0.05342	0.003118	0.18133
6	rs9388125	0	123059586	T	C	-0.02646	0.03005	0.1527	0.05265	0.003118	0.17916
8	rs1435446	0	131826621	A	G	-0.04802	0.03495	0.161	0.06148	0.003124	0.20902
13	rs9567399	0	44857869	C	A	0.06648	0.03167	-0.1233	0.05585	0.003125	-0.18978
17	rs17568408	0	73255808	T	C	-0.05036	0.03602	0.167	0.06416	0.003129	0.21736
15	rs2567452	0	96366704	T	C	-0.01371	0.03163	0.1732	0.05477	0.003129	0.18691
3	rs9864154	0	43247753	C	T	0.06856	0.03353	-0.1315	0.05883	0.003129	-0.20006
4	rs6825690	0	142296923	G	A	-0.0898	0.06715	0.3064	0.1161	0.003138	0.3962
6	rs3861401	0	143015405	A	G	0.1361	0.05552	-0.1988	0.09888	0.003141	-0.3349
13	rs9521755	0	111073710	C	T	-0.01062	0.03092	0.1739	0.05428	0.003144	0.18452
15	rs16974510	0	85278404	C	T	0.06374	0.05817	-0.2898	0.1046	0.003146	-0.35354
4	rs10010118	0	79176094	C	T	-0.007939	0.03125	0.1795	0.05527	0.003148	0.187439
11	rs17737150	0	101066080	C	T	0.04944	0.03384	-0.1517	0.05912	0.003151	-0.20114
2	rs11895724	0	4494928	C	T	-0.11	0.05928	0.245	0.1046	0.003152	0.355
2	rs10166200	0	33722854	G	A	0.06051	0.03449	-0.1462	0.06092	0.003153	-0.20671
11	rs12577704	0	12148250	C	T	0.03322	0.05926	-0.3175	0.103	0.003154	-0.35072
2	rs17009207	0	30421533	T	G	0.0649	0.03282	-0.1313	0.05781	0.003161	-0.1962
7	rs2529190	0	101341246	T	C	0.05801	0.03508	-0.1503	0.06122	0.003161	-0.20831
13	rs1924812	0	74001257	T	C	0.2094	0.07323	-0.2214	0.1263	0.003162	-0.4308
15	rs955651	0	94084236	T	C	-0.1487	0.07711	0.3129	0.1361	0.003164	0.4616
9	rs10987895	0	130909329	T	C	0.07897	0.03295	-0.1172	0.05773	0.003169	-0.19617
10	rs16915897	0	53012950	C	T	-0.06824	0.06221	0.3069	0.1108	0.003169	0.37514
4	rs4446276	0	169889068	T	C	-0.02836	0.03067	0.1555	0.05423	0.00317	0.18386
6	rs2842556	0	76447204	T	C	0.1163	0.04146	-0.126	0.07086	0.003171	-0.2423
8	rs7008510	0	56082824	A	G	0.05237	0.03072	-0.1279	0.05281	0.003171	-0.18027
11	rs10897407	0	63137384	A	G	0.05859	0.03083	-0.125	0.05405	0.003172	-0.18359
12	rs7980205	0	32794959	G	T	-0.02054	0.03201	0.1708	0.05639	0.003172	0.19134
4	rs2725256	0	89050998	G	A	-0.02786	0.03062	0.1538	0.05343	0.003177	0.18166
10	rs11000178	0	53692081	T	C	-0.04355	0.03524	0.1651	0.06133	0.003178	0.20865
20	rs2210046	0	14880327	C	T	0.01773	0.04502	-0.2494	0.07857	0.003178	-0.26713
9	rs2476923	0	99021661	A	G	-0.06915	0.02974	0.1096	0.0528	0.003178	0.17875
14	rs10137275	0	97170185	T	G	-0.1303	0.08259	0.3552	0.1424	0.003185	0.4855
2	rs216618	0	80805144	C	T	0.05867	0.05676	-0.2785	0.09923	0.003185	-0.33717
21	rs4148105	0	43644009	C	T	0.04702	0.03086	-0.1371	0.05429	0.003185	-0.18412
1	rs4655956	0	87868540	G	A	-0.07634	0.03609	0.1415	0.06443	0.003186	0.21784
5	rs324059	0	40962547	G	A	-0.04304	0.03324	0.1542	0.05803	0.003187	0.19724
11	rs7934611	0	134613171	T	C	-0.1773	0.06394	0.1959	0.1092	0.003188	0.3732
19	rs2900969	0	13680764	C	T	0.1574	0.08355	-0.352	0.1512	0.003189	-0.5094
2	rs2272499	0	173332115	A	G	-0.03891	0.03271	0.1564	0.05761	0.00319	0.19531
15	rs1434232	0	100103823	G	A	0.01485	0.03459	-0.1917	0.06091	0.003192	-0.20655
3	rs6770257	0	34184505	C	T	-0.08114	0.04654	0.1972	0.08212	0.003192	0.27834
6	rs2253957	0	105771520	C	T	0.07442	0.06573	-0.3172	0.1154	0.003194	-0.39162
14	rs8185	0	75408789	C	T	0.08334	0.04045	-0.1589	0.07153	0.003195	-0.24224
12	rs2131377	0	91730776	T	G	-0.05205	0.03597	0.1614	0.06285	0.003196	0.21345
5	rs17252737	0	111458013	T	C	-0.04899	0.03211	0.1415	0.05608	0.003198	0.19049
7	rs2268569	0	44227020	T	G	0.1109	0.05579	-0.2221	0.09821	0.003198	-0.333
3	rs601204	0	42528031	T	C	-0.01253	0.03347	0.185	0.05804	0.003198	0.19753
12	rs7315271	0	39164731	G	A	0.04116	0.03017	-0.1393	0.05327	0.003199	-0.18046
6	rs9346673	0	168664184	A	G	-0.06999	0.03623	0.1489	0.06483	0.003202	0.21889
15	rs2683082	0	36035244	C	T	0.1523	0.06596	-0.2328	0.1128	0.003204	-0.3851
10	rs11254900	0	6993426	A	G	0.03862	0.04187	-0.214	0.0748	0.003206	-0.25262
6	rs4507587	0	43775838	C	T	0.03478	0.0334	-0.1634	0.05839	0.003208	-0.19818
18	rs9964979	0	12331501	T	C	-0.01049	0.04073	0.2309	0.07107	0.00321	0.24139
17	rs2661611	0	71708855	G	T	-0.02473	0.03577	0.1876	0.06257	0.003213	0.21233
4	rs6531673	0	38847917	C	T	0.0345	0.02993	-0.143	0.05228	0.003214	-0.1775
3	rs7619872	0	43116170	T	C	0.0007698	0.03956	-0.2349	0.06952	0.003218	-0.2356698
14	rs12884591	0	86179337	C	T	-0.09222	0.04512	0.1759	0.07904	0.003219	0.26812
9	rs4642743	0	11936751	G	A	0.04533	0.09877	-0.5631	0.1814	0.00322	-0.60843
6	rs11155758	0	151254080	T	C	-0.06764	0.03528	0.1439	0.06256	0.003221	0.21154
2	rs17011943	0	32621143	C	T	0.03099	0.05826	-0.324	0.1055	0.003221	-0.35499
9	rs1929412	0	11951222	A	C	0.04139	0.09823	-0.5642	0.1806	0.003222	-0.60559
10	rs10994386	0	62260544	G	A	0.04376	0.04662	-0.234	0.08198	0.003225	-0.27776
14	rs974074	0	30001675	T	C	0.01806	0.03632	0.2354	0.06422	0.003226	0.21734
8	rs478917	0	102889127	A	G	0.04025	0.03711	-0.1793	0.06466	0.00323	-0.21955
20	rs6066791	0	47251687	A	G	-0.02869	0.03359	0.1734	0.05984	0.00323	0.20209
8	rs10957500	0	70542444	C	T	0.009793	0.03328	-0.1876	0.0582	0.003232	-0.197393
18	rs321858	0	48974344	T	C	-0.01425	0.03054	0.1682	0.05392	0.003233	0.18245
7	rs273136	0	41503620	T	C	-0.01615	0.03456	0.1906	0.06113	0.003235	0.20675
9	rs7856684	0	83701931	A	G	0.07901	0.03393	-0.1236	0.05987	0.003237	-0.20261
8	rs1521154	0	119641169	C	T	0.006491	0.03518	-0.2032	0.06193	0.003238	-0.209691
20	rs4295085	0	8889613	A	C	-0.01261	0.03052	0.1681	0.05323	0.003238	0.18071
16	rs8054651	0	51096971	A	G	-0.1371	0.1015	0.472	0.1803	0.003239	0.6091
16	rs175366	0	74225324	C	A	0.06245	0.02996	-0.1153	0.05244	0.00324	-0.17775
1	rs10875064	0	97778724	T	C	0.06988	0.03108	-0.1154	0.05473	0.003241	-0.18528
1	rs1181875	0	3681831	C	T	0.01944	0.0538	-0.2998	0.09414	0.003241	-0.31924
7	rs1882526	0	25639031	C	T	0.009584	0.0368	0.2295	0.06502	0.003242	0.219916
3	rs2004107	0	149101811	C	T	0.09287	0.04095	-0.1487	0.07113	0.003243	-0.24157
9	rs2774237	0	93558346	T	G	-0.2158	0.06624	0.1832	0.1183	0.003243	0.399
6	rs806374	0	88857320	C	T	0.0602	0.03134	-0.1282	0.05579	0.003244	-0.1884
6	rs1132643	0	123047016	C	T	-0.03559	0.03017	0.1435	0.05285	0.00325	0.17909
10	rs2358398	0	19751780	T	C	-0.1087	0.03844	0.1194	0.0673	0.00325	0.2281
12	rs10735467	0	84024462	G	A	-0.09366	0.03811	0.1356	0.06793	0.003252	0.22926
13	rs9578453	0	22843286	T	C	-0.02463	0.03881	0.2088	0.06918	0.003252	0.23343
9	rs3118850	0	90290816	A	G	-0.02942	0.03828	0.1963	0.06646	0.003256	0.22572
18	rs900973	0	43235882	T	G	-0.01916	0.03901	0.2152	0.06944	0.003257	0.23436
16	rs12920161	0	83122828	T	G	0.06101	0.03068	-0.1209	0.05368	0.00326	-0.18191
[truncated: 555,827 more rows]
