# Supplementary material for: Genome-wide interaction study of a proxy for stress-sensitivity and its prediction of major depressive disorder
Source: PLoS One. 2018 Dec 20;13(12):e0209160. doi: 10.1371/journal.pone.0209160 (PMC6301766; doi:10.1371/journal.pone.0209160)
Supplement: S2 Table — (XLSX) [file pone.0209160.s012.xlsx]

## Sheet: Sheet1
S2 Table. Top 10 SNPs from GWIS on UK Biobank
CHR	SNP	BP	A1	BETA1	SE1	BETA2	SE2	BETA	p value	P.TYPE	GENE	G.POSITION
11	rs2221540	132716369	G	-0.1362	0.06346	0.5033	0.1096	0.6395	4.41e-07	intronic	OPCML	-
6	rs319924	64487247	G	0.08516	0.03036	-0.2229	0.05302	-0.30806	4.619e-07	intronic	EYS	-
10	rs2256220	24856314	C	-0.07145	0.03121	0.2416	0.05459	0.31305	6.427e-07	intergenic	ARHGAP21	16224
16	rs4783107	84996447	T	-0.1134	0.04602	0.3404	0.08248	0.4538	1.551e-06	intergenic	ZDHHC7	13502
10	rs2265265	24854876	T	-0.06464	0.03012	0.2206	0.05277	0.28524	2.682e-06	intergenic	ARHGAP21	17662
19	rs1078734	39308874	C	0.08035	0.03003	-0.2066	0.05328	-0.28695	2.713e-06	intronic	ECH1/HNRNPL	-
11	rs4575282	132719646	C	-0.1084	0.06247	0.4692	0.107	0.5776	3.159e-06	intronic	OPCML	-
6	rs1057530	64427095	T	0.0948	0.03001	-0.1876	0.05283	-0.2824	3.336e-06	intergenic	PHF3	-3491
6	rs10485358	64386060	T	0.09146	0.03004	-0.1902	0.05277	-0.28166	3.514e-06	intronic	PHF3	-
5	rs3913723	41560079	G	0.1371	0.06798	-0.4449	0.1153	-0.582	1.365e-05	intergenic	PLCXD3	-49451
A1 minor allele, BETA1 SNP effect in neuroticism score (EPQN) within MDD controls, BETA2 SNP effect in EPQN within MDD cases, BETA stress-sensitivity effect (i.e. differential allelic effect in EPQN between MDD cases and controls; BETA2 effect minus BETA1 effect), p value reflects significance of BETA coefficient, P.TYPE SNP's position type, GENE closest gene within 100kb, G.POSITION position of …
