# Supplementary material for: Genome-wide interaction study of a proxy for stress-sensitivity and its prediction of major depressive disorder
Source: PLoS One. 2018 Dec 20;13(12):e0209160. doi: 10.1371/journal.pone.0209160 (PMC6301766; doi:10.1371/journal.pone.0209160)
Supplement: S3 Table — (XLSX) [file pone.0209160.s013.xlsx]

## Sheet: Sheet1
S3 Table. Top 10 SNPs from GWIS on Generation Scotland: Scottish Family Health Study
CHR	SNP	BP	A1	BETA1	SE1	BETA2	SE2	BETA	p value	P.TYPE	GENE	G.POSITION
3	rs10510908	63762994	A	-0.07792	0.02704	0.1588	0.04224	0.23672	2.36x10-6	intergenic	THOC7	56302
11	rs7934698	134412739	A	-0.0633	0.03157	0.2141	0.04959	0.2774	2.37x10-6	intergenic	-	-
2	rs7606549	115490198	A	0.02374	0.02006	-0.154	0.03187	-0.17774	2.37x10-6	intronic	DPP10	-
4	rs6851779	45487679	A	0.09384	0.03685	-0.2235	0.05645	-0.31734	2.51x10-6	intergenic	-	-
2	rs319858	115530841	G	0.05248	0.01983	-0.1204	0.03181	-0.17288	4.00x10-6	intronic	DPP10	-
3	rs13098181	63749405	A	-0.07987	0.02695	0.1452	0.04225	0.22507	7.11x10-6	intergenic	THOC7	13358
3	rs12108177	63673795	G	-0.07852	0.0261	0.1383	0.04087	0.21682	7.76x10-6	intergenic	SNTN	-9349
20	rs6063840	51208949	G	0.06519	0.02116	-0.1145	0.03416	-0.17969	7.77x10-6	intergenic	LINC01524	28178
12	rs4765723	3352543	C	-0.04887	0.02382	0.1471	0.03699	0.19597	8.39x10-6	intronic	TSPAN9	-
20	rs6068235	51167169	A	0.06096	0.02135	-0.1195	0.03443	-0.18046	8.42x10-6	intergenic	LINC01524	69958
A1 minor allele, P.TYPE SNP's position type, GENE closest gene within 100kb, G.POSITION position of the closest gene (bp). In bold hits from intragenic SNPs.
