# Supplementary material for: Genome-wide interaction study of a proxy for stress-sensitivity and its prediction of major depressive disorder
Source: PLoS One. 2018 Dec 20;13(12):e0209160. doi: 10.1371/journal.pone.0209160 (PMC6301766; doi:10.1371/journal.pone.0209160)
Supplement: S4 Table — The closest genes to SNPs associated with stress-sensitivity at suggestive significance levels have prior evidence of association in dbGAP with a wide range of neuropsychiatric traits such as schizophrenia, bipolar disorder, attention deficit disorder with hyperactivity, mental competency, intuition, sleep or alcohol drinking. (XLSX) [file pone.0209160.s014.xlsx]

## Sheet: Sheet1
S4 Table. Traits with significant evidence of association with closest gene to suggestive stress-sensitive hits
The closest genes to SNPs associated with stress-sensitivity at suggestive significance levels have prior evidence of association in dbGAP with a wide range of neuropsychiatric traits such as schizophrenia, bipolar disorder, attention deficit disorder with hyperactivity, mental competency, intuition, sleep or alcohol drinking.
Trait	SNP	Chr	Location	Context	Gene	p value	Source	PubMed
Cholesterol, LDL	rs10515153	5	71989150	intergenic	ZNF366	2.18 x10-25	dbGaP	17903299
Alcohol Drinking	rs10515153	5	71989150	intergenic	ZNF366	3.50 x10-15	dbGaP	0
Cholesterol, LDL	rs10515153	5	71989150	intergenic	ZNF366	9.38 x10-12	dbGaP	17903299
Echocardiography	rs10515153	5	71989150	intergenic	ZNF366	4.78 x10-08	dbGaP	17903301
Mental Competency	rs3858216	10	24689550	intron	KIAA1217	7.72 x10-16	dbGaP	17903295
Respiratory Function Tests	rs1941212	11	133288335	intron	OPCML	4.91 x10-10	dbGaP	17903307
Respiratory Function Tests	rs1941212	11	133288335	intron	OPCML	8.44 x10-10	dbGaP	17903307
Respiratory Function Tests	rs1941212	11	133288335	intron	OPCML	4.58 x10-08	dbGaP	17903307
Respiratory Function Tests	rs1941211	11	133288419	intron	OPCML	5.78 x10-12	dbGaP	17903307
Respiratory Function Tests	rs1941211	11	133288419	intron	OPCML	1.18 x10-11	dbGaP	17903307
Exercise Test	rs1941211	11	133288419	intron	OPCML	4.56 x10-11	dbGaP	17903301
Body Mass Index	rs1941211	11	133288419	intron	OPCML	3.22 x10-10	dbGaP	17903300
Cardiovascular Diseases	rs1941211	11	133288419	intron	OPCML	6.05 x10-10	dbGaP	17903304
Cardiovascular Diseases	rs1941211	11	133288419	intron	OPCML	9.36 x10-10	dbGaP	17903304
Body Mass Index	rs1941211	11	133288419	intron	OPCML	1.27 x10-09	dbGaP	17903300
Angiography	rs1941211	11	133288419	intron	OPCML	2.65 x10-09	dbGaP	17903301
Cardiovascular Diseases	rs1941211	11	133288419	intron	OPCML	2.81 x10-09	dbGaP	17903304
Angiography	rs1941211	11	133288419	intron	OPCML	1.54 x10-08	dbGaP	17903301
Body Mass Index	rs1941211	11	133288419	intron	OPCML	2.03 x10-08	dbGaP	17903300
Respiratory Function Tests	rs1941211	11	133288419	intron	OPCML	2.08 x10-08	dbGaP	17903307
Respiratory Function Tests	rs1941211	11	133288419	intron	OPCML	3.05 x10-08	dbGaP	17903307
Cholesterol, HDL	rs10507129	12	101478127	intron	ANO4	1.44 x10-10	dbGaP	17903299
Cardiovascular Diseases	rs2278075	16	78291173	intron	WWOX	5.32 x10-09	dbGaP	17903304
Body Mass Index	rs9319533	16	79088978	intron	WWOX	3.56 x10-11	dbGaP	17903300
C-Reactive Protein	rs9319533	16	79088978	intron	WWOX	6.00 x10-11	dbGaP	17903293
Insulin	rs9319533	16	79088978	intron	WWOX	6.89 x10-10	dbGaP	17903298
Body Weight	rs9319533	16	79088978	intron	WWOX	9.54 x10-10	dbGaP	17903300
Body Mass Index	rs9319533	16	79088978	intron	WWOX	2.82 x10-09	dbGaP	17903300
Trait	SNP	CHR	BP	Context	Gene	p value	Source	PubMed
Mental Competency	rs3858216	10	24689550	intron	KIAA1217	7.72 x10-16	dbGaP	17903295
Cardiovascular Diseases	rs1941211	11	133288419	intron	OPCML	6.05 x10-10	dbGaP	17903304
Sleep	rs1939966	11	132297204	intron	OPCML	7.82 x10-06	dbGaP	17903308
Diabetes Mellitus	rs7927989	11	133356488	intron	OPCML	7.89 x10-06	dbGaP	0
Schizophrenia	rs7125438	11	132402910	intron	OPCML	2.08 x10-05	dbGaP	0
Attention Deficit Disorder with Hyperactivity	rs10786284	10	98135505	intron	TLL2	2.00 x10-06	NHGRI	18839057
Cardiovascular Diseases	rs2278075	16	78291173	intron	WWOX	5.32 x10-09	dbGaP	17903304
Intuition	rs17706989	16	78569957	intron	WWOX	1.00 x10-06	NHGRI	21107309
Diabetes Mellitus	rs414723	16	79228250	intron	WWOX	2.34 x10-05	dbGaP	0
Bipolar Disorder	rs8047442	16	78764097	intron	WWOX	2.97 x10-05	dbGaP	0
Schizophrenia	rs7200634	16	79176337	intron	WWOX	7.11 x10-05	dbGaP	0
Alcohol Drinking	rs10515153	5	71989150	intergenic	ZNF366	3.50 x10-15	dbGaP	0
dbGaP database of Genotypes and Phenotypes, NHGRI National Human Genome Research Institute; Data shown are compiled from both NHGRI GWAS Catalog (Source = NHGRI) and from most significant hits across analyses submitted to dbGaP. Top table: any trait with p value < 5x10-8, bottom table any depression related trait with p value < 1x10-5.
