# Supplementary material for: Genome-wide interaction study of a proxy for stress-sensitivity and its prediction of major depressive disorder
Source: PLoS One. 2018 Dec 20;13(12):e0209160. doi: 10.1371/journal.pone.0209160 (PMC6301766; doi:10.1371/journal.pone.0209160)
Supplement: S5 Table — (XLSX) [file pone.0209160.s015.xlsx]

## Sheet: Sheet1
S5 Table. Top 25 hits from gene-based analysis of GWIS meta-analysis
SYMBOL	CHR	START	STOP	NSNPS	p value
ZNF366	5	71728479	71813554	22	1.48x10-7
PHF3	6	64335725	64499229	13	1.02x10-5
ANO4	12	101101304	101532419	142	1.81x10-5
ABCC10	6	43385104	43428168	15	1.02x10-4
LATS2	13	21537171	21645686	24	1.04x10-4
ABCA2	9	139891686	139933367	4	1.06x10-4
PRKG1	10	52740945	54068110	378	1.27x10-4
PPARA	22	46536424	46649653	40	1.50x10-4
C9orf139	9	139911916	139941234	8	1.73x10-4
AMBRA1	11	46407964	46625675	10	1.83x10-4
ZFYVE28	4	2261309	2430390	36	2.76x10-4
C4orf22	4	81246874	81894910	54	2.86x10-4
ATG13	11	46628826	46706368	9	2.9x10-4
CBR4	4	169774921	169941426	20	3.42x10-4
MDK	11	46392306	46415375	1	3.6x10-4
ABCG1	21	43609799	43727354	77	5.49x10-4
F2	11	46730730	46771056	5	5.57x10-4
PRKCD	3	53180025	53236733	10	6.54x10-4
SMARCA4	19	11061598	11186071	17	6.76x10-4
PTPN3	9	112127746	112270590	34	6.98x10-4
FUT7	9	139914626	139937462	6	7.36x10-4
DGKZ	11	46344455	46412104	3	7.48x10-4
MYOM3	1	24372525	24448665	37	7.8x10-4
LCE3D	1	152541857	152562980	4	7.9x10-4
LIMK2	22	31598225	31686066	9	8.09x10-4
START/STOP the annotation boundaries of the gene including 10kb window on each side. NSNPS the number of SNPs annotated to that gene that were found in the meta-analysis summary statistics.
