# Supplementary material for: Genome-wide interaction study of a proxy for stress-sensitivity and its prediction of major depressive disorder
Source: PLoS One. 2018 Dec 20;13(12):e0209160. doi: 10.1371/journal.pone.0209160 (PMC6301766; doi:10.1371/journal.pone.0209160)
Supplement: S7 Table — (XLSX) [file pone.0209160.s017.xlsx]

## Sheet: Sheet1
S7 Table. MDD stratification
		MDD quintiles			Stress-sensitivity quintile			MDD*Stress-sensitivity quintiles interaction
Stratifier	Sample size	effect	SE	p value	effect	SE	p value	effect	SE	p value	mean	median	standard deviation	variance
SPQ	1 093	0.181	0.223	0.416	0.189	0.218	0.387	-0.054	0.067	0.419	5.89661	5	4.46879	19.9701
MDQ	1 022	-0.079	0.179	0.659	0.002	0.177	0.99	0.037	0.054	0.496	3.8454	3	3.56053	12.6774
EPQN	2 010	0.265	0.121	0.028	0.09	0.12	0.453	-0.051	0.036	0.162	6.42139	7	3.31506	10.9896
MDD course	2 016	0.044	0.275	0.875	0.013	0.275	0.964	-0.029	0.083	0.726	1.49256	1	0.500069	0.250069
Age of onset	1 964	-0.419	0.375	0.264	-0.572	0.377	0.129	0.127	0.114	0.264	32.5947	32	12.3955	153.648
Episode count	2 016	-0.332	0.381	0.384	-0.258	0.379	0.496	0.121	0.115	0.295	6.18502	1	10.4526	109.258
Sex	2 016	0.008	0.017	0.626	0.01	0.017	0.545	-0.005	0.005	0.33	1.66716	2	0.471346	0.222167
SPQ Schizotypal Personality Questionnaire score, MDQ Mood Disorder Questionnaire score, EPQN Eysenck Personality Questionnaire-Revised Short Form’s Neuroticism Scale. Model: Stratifier ~ MDD quintile + Stress-sensitivity quintile + MDD*SS quintiles interaction + Age + Sex.
